# Supplementary material
Source: publisher site journal article supplement (https://www.dovepress.com/get_supplementary_file.php?f=201871.xlsx)
Supplement: Supplementary file 1 [file get_supplementary_file.php]

## Sheet: Supplementary Table 1
Supplementary Table 1. Lists of 2088 proteins quantified in this study. N: normal control; A: GnRH antagonist treated group (GnRH-a); La: GnRH agonist treated group (GnRH-a);FC: fold change
IPI number	Gene_Symbol	Protein names	N1	N2	N4	N5	N6	A1	A3	A4	A5	A6	La1	La2	La4	La5	La6	P value by anova	p.t.test-N Vs A	FC-N Vs A	p.t.test-N Vs La	FC-N Vs La
IPI00029111.3	DPYSL3	dihydropyrimidinase-related protein 3 isoform 1 1	0.253648	0.247551	0.457676	0.705247	0.59514	0.391206	0.326013	0.226723	0.543593	0.304413	0.393381	0.650942	0.221841	0.516665	0.355445	0.660682	0.407357	0.793156	0.841143	0.946448
IPI00176903.2	PTRF	Isoform 1 of Polymerase I and transcript release factor I	0.568606	0.506558	0.346878	0.458756	0.622782	8.73738	4.24157	8.17943	3.67285	11.5274	8.32183	9.54801	5.22127	4.86621	2.70701	0.00217144	0.0099531	14.5227	0.0103623	12.2482
IPI00304840.4	COL6A2	Isoform 2C2 of Collagen alpha-2(VI) chain alpha-2(VI)	11.8729	8.35419	15.2211	16.5138	9.83006	21.6066	25.0025	21.6351	37.818	28.1702	43.1503	35.3221	30.1649	30.1921	31.9026	0.000113934	0.00516756	2.17232	0.000155956	2.76301
IPI00011619.4	PAPSS1	Bifunctional 3-phosphoadenosine 5-phosphosulfate synthase 1 1	28.2171	18.4762	30.4042	32.7699	39.5224	11.5787	19.7749	12.3343	20.9445	11.3956	7.7093	14.0685	18.0835	8.06962	14.2837	0.000973945	0.00895541	0.508923	0.003864	0.416458
IPI00298994.6	TLN1	Talin-1	34.2279	36.6388	34.9447	36.3227	41.2122	81.5888	62.6829	53.7167	91.6524	82.5044	99.8922	80.0262	72.1836	89.8097	48.8572	0.00113994	0.00510484	2.02974	0.00825016	2.13132
IPI00291136.4	COL6A1	Collagen alpha-1(VI) chain	31.7679	18.5121	33.2573	40.8029	28.1059	44.4035	48.614	46.4466	101.062	66.1239	136.921	101.146	54.5459	64.111	68.2899	0.0135862	0.0415569	2.01153	0.0209439	2.78796
IPI00163684.1	LGALS9	Uncharacterized protein	0.330129	0.116226	0.219136	0.414717	0.463069	0.221396	0.698001	0.315782	0.465903	0.216915	0.425874	0.281362	0.5208	0.227258	0.389961	0.734601	0.519518	1.24281	0.484158	1.19567
IPI00012119.1	DCN	Isoform A of Decorin	4.81154	5.46795	7.64544	7.70182	6.59924	18.6655	16.3011	17.0819	26.9647	21.1253	53.5495	38.2132	19.5677	18.5919	26.8286	0.0028876	0.00133809	3.10738	0.0189151	4.86411
IPI00022977.1	CKB	Creatine kinase B-type	189.086	175.156	221.521	209.281	184.439	203.94	178.082	260.71	220.098	173.934	196.679	252.878	170.946	78.4336	71.9938	0.256499	0.54623	1.05848	0.303414	0.787079
IPI00945254.1	PALLD	palladin isoform 3	0.172205	0.172588	0.351525	0.288431	0.472636	0.173692	0.252141	0.333579	0.835725	0.364806	0.38374	0.17421	0.342838	0.112695	0.17007	0.412216	0.466499	1.34483	0.502123	0.812108
IPI00220701.6	COL6A3	Isoform 2 of Collagen alpha-3(VI) chain alpha-3(VI)	105.573	54.5913	70.3803	87.6754	60.8675	122.811	120.71	135.383	220.724	169.883	278.764	208.471	142.518	153.309	140.692	0.00561297	0.0104977	2.0299	0.0119131	2.43678
IPI01022906.1	PPP1CC	Uncharacterized protein	0.192336	0.470837	0.442485	0.361433	0.360807	0.333579	0.304772	0.29264	0.533663	0.266998	0.462588	0.414804	0.456409	0.343814	0.220875	0.882859	0.785121	0.947346	0.836389	1.03862
IPI00289499.3	ATIC	Bifunctional purine biosynthesis protein PURH PURH	13.3327	12.2482	11.3286	14.1517	14.2531	5.8381	5.8018	7.11913	7.31319	5.46151	10.9049	5.06724	7.209	9.36449	5.63885	8.10973e-05	2.20522e-05	0.4828	0.00480444	0.584626
IPI00896474.3	TPD52	Isoform 2 of Tumor protein D52 protein	5.0799	5.89871	6.25582	4.77268	8.05453	1.77166	3.45001	4.15774	2.94793	2.86851	3.10566	4.25188	4.55863	4.05696	2.70776	0.00142916	0.00366809	0.505489	0.0129958	0.621419
IPI01012383.1	OTUB1	Uncharacterized protein	3.42404	6.24932	4.15486	1.87436	2.42402	1.76101	1.68109	1.87618	2.49874	1.5696	0.121464	0.295125	0.152491	0.472439	0.313166	0.000798365	0.0836489	0.517837	0.0116342	0.0747347
IPI00784154.1	HSPD1	60 kDa heat shock prote prote	97.7483	86.3725	98.6126	109.927	113.811	94.9437	120.142	101.195	138.256	101.864	109.099	84.5539	95.936	87.0939	71.4024	0.100556	0.321395	1.09858	0.181214	0.88472
IPI00026268.3	GNB1	Guanine nucleotide-binding protein G(I)/G(S)/G(T) subunit beta-1 subunit	9.28692	6.36826	5.48541	7.02063	8.28097	10.1831	12.0855	12.1131	14.6863	10.1415	26.0895	16.2391	13.6488	16.2492	14.0276	0.00146932	0.0030955	1.62475	0.00972442	2.36688
IPI01010766.1	BSG	Uncharacterized protein	3.04998	4.18173	10.8754	8.69087	6.62353	3.56895	3.15426	5.69383	6.83907	5.32507	4.69492	4.39146	3.4926	4.50148	6.41656	0.309978	0.310082	0.735489	0.247151	0.70305
IPI01011823.1	IGFBP7	cDNA FLJ56737, highly similar to Insulin-like growth factor-binding protein 7 to	0.527119	0.19963	0.151974	0.251564	0.30338	5.11275	1.59715	0.815185	5.57356	1.47959	6.21347	3.39521	2.55602	4.50492	3.97292	0.00534217	0.0585129	10.1685	0.00314026	14.3984
IPI00026663.2	ALDH1A3	Aldehyde dehydrogenase family 1 member A3 member	5.57859	2.97915	6.026	7.38245	0.476649	7.211	16.9123	10.9102	19.812	20.4227	48.6578	15.3408	2.68198	16.7757	5.29379	0.184185	0.0110924	3.35377	0.181863	3.95449
IPI00418234.4	MECP2	Isoform A of Methyl-CpG-binding protein 2 protein	0.270875	0.194953	0.287513	0.381168	0.238953	0.69366	0.306891	0.207689	0.389879	0.564013	0.21132	0.268743	0.144246	0.553786	0.441627	0.29372	0.150666	1.57422	0.57198	1.1793
IPI00021405.3	LMNA	Isoform A of Prelamin-A/C	72.5297	68.3088	69.4499	100.204	84.0456	157.761	77.3806	87.7788	94.5038	105.69	126.553	125.435	128.516	95.4915	107.642	0.0451629	0.14892	1.32589	0.00275372	1.47929
IPI00302592.2	FLNA	Isoform 2 of Filamin-A	160.653	143.142	139.305	186.018	116.825	311.567	176.13	150.05	265.469	277.242	304.395	225.471	233.148	315.326	194.807	0.0175794	0.0460236	1.58251	0.00734826	1.70676
IPI00027223.2	IDH1	IDH1 Isocitrate dehydrogenase [NADP] cytoplasmic	171.041	161.893	156.184	161.949	192.939	43.3242	80.0983	140.683	68.1291	85.4021	49.2073	65.0195	70.4535	27.6805	61.3036	2.29651e-05	0.00375279	0.494826	3.84535e-06	0.324244
IPI00550239.4	H1F0	Histone H1.0	18.1488	10.1387	9.21702	14.432	10.8265	33.1974	14.4741	25.0268	16.4134	16.9123	29.0487	30.0772	17.5415	18.313	26.0498	0.0265034	0.0691698	1.68927	0.00795172	1.92837
IPI00020986.2	LUM	Lumican	11.8918	17.2928	15.8488	18.6655	14.3711	41.1865	31.7856	30.5309	48.4996	45.7595	38.5324	47.1178	45.8294	41.2751	21.9234	0.000415991	0.00170368	2.53314	0.00540667	2.49363
IPI00013683.2	TUBB3	Tubulin beta-3 chain	0.160885	0.077471	0.277623	0.261412	0.194926	1.33774	0.223818	0.200198	0.379692	0.63653	3.39191	1.85369	1.23243	0.491887	0.295453	0.0623835	0.162033	2.85707	0.0870913	7.47222
IPI00479242.1	HLA-B	HLA class I histocompatibility antigen, B-8 alpha chain	0.337252	0.171955	1.45902	0.719068	0.777492	13.6592	7.22902	8.82747	11.5362	19.9511	8.48844	10.4679	20.532	18.2623	8.70051	0.00105588	0.00629358	17.6643	0.00753446	19.179
IPI00294578.1	TGM2	Isoform 1 of Protein-glutamine gamma-glutamyltransferase 2 gamma-glutamyltransferase	37.2896	16.6413	41.5507	32.695	24.7559	83.4824	74.5016	37.9493	119.18	126.641	159.013	93.1381	84.0805	209.935	78.7605	0.00865866	0.0205201	2.88856	0.0202141	4.08629
IPI00027230.3	HSP90B1	Endoplasmin	149.946	130.337	152.472	161.344	155.892	117.727	133.528	142.488	172.733	156.281	136.107	100.253	107.099	120.961	77.0167	0.00900682	0.631273	0.963688	0.00977774	0.721925
IPI00013508.5	ACTN1	Isoform 1 of Alpha-actinin-1	12.1754	21.5035	18.5263	14.9441	18.1739	25.6111	20.4255	14.1311	22.0224	30.278	16.7003	17.1448	24.6275	31.9291	13.2507	0.367026	0.129754	1.31814	0.364417	1.21482
IPI00867560.2	TNC	Uncharacterized protein	0.174948	0.432059	0.275782	0.199326	0.329215	0.430863	0.610558	0.152957	0.554939	0.368082	0.768811	0.191418	0.326601	0.647836	0.312407	0.342166	0.175162	1.50029	0.216301	1.59217
IPI01022164.1	TUBB	Uncharacterized protein	340.804	249.155	272.706	286.323	350.143	239.935	232.293	240.668	281.892	228.698	275.613	216.197	203.051	250.28	189.677	0.0158837	0.0462635	0.81613	0.021076	0.756984
IPI00646773.2	GSN	Isoform 2 of Gelsolin	156.011	126.378	139.131	216.212	194.133	74.7447	81.7417	105.442	125.062	85.9485	85.657	113.614	76.5855	55.139	50.7347	0.000813291	0.00919103	0.568529	0.00306377	0.458886
IPI00014898.3	PLEC	Isoform 1 of Plectin	18.7355	24.2112	32.6905	40.5463	13.0783	69.6523	54.6481	40.1214	68.4605	62.6959	80.4544	69.8022	76.1093	73.7208	62.0561	3.42672e-05	0.00193977	2.28666	0.000105503	2.80162
IPI00247063.3	MME	MME Neprilysin	5.34393	6.00765	6.21261	5.74059	1.82564	14.6355	7.37682	9.71356	6.65667	4.96468	5.10815	4.39237	2.66143	2.60124	7.52609	0.0578132	0.0999557	1.72489	0.653808	0.886944
IPI00020999.6	ENPP3	Ectonucleotide pyrophosphatase/phosphodiesterase famil	5.996	10.176	41.4184	36.358	54.8531	0.197141	0.435215	10.4201	1.69466	2.5062	1.34434	5.42115	0.301243	0.666187	0.521341	0.00581185	0.0450113	0.102508	0.0395631	0.0554717
IPI00719622.1	RPS28	40S ribosomal protein S28	0.298003	0.104763	0.217562	3.97733	0.430475	9.00484	6.69693	6.95042	12.2678	5.3026	16.317	11.2816	5.71122	5.94345	9.17368	0.00199762	0.00191361	7.9995	0.00845268	9.63119
IPI00302944.3	COL12A1	Isoform 4 of Collagen alpha-1(XII) chain alpha-1(XII)	0.1944	0.265411	0.250451	0.256672	0.563896	0.147737	0.309433	0.321458	0.472505	0.547412	1.34108	0.172851	0.357744	0.188888	0.259643	0.724033	0.591037	1.17488	0.526889	1.51565
IPI00218493.7	HPRT1	Hypoxanthine-guanine phosphoribosyltransferase	17.1282	8.39424	10.5707	7.74358	7.48084	2.31578	5.75454	8.30914	8.03557	6.08181	3.90034	5.39566	4.09794	1.32271	4.22104	0.0112582	0.0902942	0.594277	0.0193352	0.36903
IPI00024870.1	MYH11	myosin-11 isoform SM2A	0.245008	0.196759	0.462107	0.441964	0.317318	1.96088	0.504351	0.389852	0.646938	2.5463	0.591234	0.173668	0.163448	0.191087	0.119452	0.0412024	0.115737	3.63665	0.431685	0.744902
IPI00021290.5	ACLY	ATP-citrate synthase	10.6834	6.83291	4.17304	7.44463	7.47048	4.81956	2.98328	7.39833	7.67252	8.27753	6.22339	4.92936	4.66507	4.19538	5.50331	0.228794	0.471521	0.851022	0.0996701	0.697087
IPI00847322.1	SOD2	superoxide dismutase [Mn], mitochondrial isoform isoform	3.5108	4.30795	12.6109	20.6304	7.56531	44.2038	34.1876	16.1885	30.6709	35.7086	34.6888	30.7177	72.2687	87.1181	33.1537	0.00671123	0.00478549	3.3102	0.0210756	5.30479
IPI00555734.3	ASRGL1	Isoform 1 of L-asparaginase	30.6773	22.7517	23.8068	35.8823	39.8305	12.067	17.7827	22.7438	16.9745	17.0169	18.1048	27.5446	16.5127	7.07976	19.4946	0.0100049	0.0121271	0.566105	0.0249629	0.580172
IPI00008599.3	EBP	3-beta-hydroxysteroid-Delta(8),Delta(7)-isomerase	1.47294	1.62744	1.02605	1.62293	1.28014	0.233226	0.235811	0.170507	0.0954904	0.339175	0.756284	0.343361	0.322864	0.332978	0.152576	1.42124e-06	0.000189122	0.152814	0.000157363	0.271437
IPI00297646.5	COL1A1	Collagen alpha-1(I) chain	31.2763	23.7738	8.50317	15.2507	11.2324	15.7983	75.2125	112.767	102.041	61.461	227.796	221.967	189.362	90.3342	121.28	0.000342638	0.0294124	4.07923	0.00476694	9.44883
IPI00005585.5	TAX1BP3	Tax1-binding protein 3	0.163097	0.204631	0.259589	0.241635	0.295412	0.413999	0.585362	0.265245	1.02491	0.173475	0.355939	0.292884	0.608825	0.642158	0.107626	0.24772	0.159521	2.11531	0.169747	1.72406
IPI00177728.3	CNDP2	Isoform 1 of Cytosolic non-specific dipeptidase non-specific	245.265	198.391	340.663	264.239	297.367	139.199	169.542	247.674	188.406	171.243	92.2195	157.674	165.513	91.875	127.028	0.000848191	0.0226086	0.68062	0.00170419	0.471281
IPI00465352.2	CAPS	Calcyphosin	43.4324	22.1694	30.7945	41.542	43.6255	26.1366	12.8857	19.1238	19.2062	9.37878	26.1167	39.1082	19.9097	11.5602	14.8182	0.0174042	0.00769775	0.477689	0.0627271	0.614181
IPI00015018.1	PPA1	Inorganic pyrophosphatase	28.6785	44.9859	23.1269	36.5475	25.0441	12.3805	16.9934	16.7966	19.8106	8.8073	14.6193	15.18	18.0797	13.488	16.1493	0.000972557	0.0105428	0.4722	0.0149344	0.489423
IPI00219365.3	MSN	Moesin	31.5879	20.0677	22.1986	30.9657	25.5845	38.7682	29.1697	24.6514	45.1514	34.5497	59.8758	37.3051	44.0753	50.6433	35.6221	0.00782026	0.0910101	1.3212	0.0083948	1.74474
IPI00853220.1	SEC31A	Isoform 6 of Protein transport protein Sec31A transport	4.06428	2.3033	1.69702	2.67104	3.16236	0.154192	0.895522	0.694044	0.940761	0.237105	2.40461	2.32286	1.74279	1.33904	2.14593	0.000375314	0.00325292	0.210219	0.129459	0.716307
IPI01010887.1	STOM	cDNA FLJ52062, highly similar to Erythrocyte band 7 integral membrane protein to	0.312472	0.051793	0.338681	0.486867	0.917068	2.20595	2.92027	1.74908	4.26073	2.47409	2.71358	3.23575	2.32447	2.31354	2.7198	9.38122e-05	0.00409694	6.45984	9.36777e-06	6.31604
IPI00026781.3	FASN	Fatty acid synthase	34.4039	33.5793	30.438	26.0751	21.8506	5.76292	11.3664	23.007	3.48317	8.99361	3.17598	2.75108	2.56774	1.67052	10.0547	3.9818e-05	0.0025785	0.359509	5.00395e-05	0.138165
IPI00789037.1	NR2F2	COUP transcription factor 2 isoform b isoform	0.141787	0.173836	0.181734	0.363997	0.384112	0.293656	0.454641	0.289493	0.324435	0.505576	0.24936	0.113739	0.221857	0.240515	0.228791	0.0432769	0.106183	1.49968	0.529535	0.846479
IPI00106687.4	LXN	Latexin	0.24936	0.242474	0.300242	0.338423	0.201716	0.331068	0.225876	0.530344	0.913768	0.239467	0.389582	0.254247	0.0929694	0.315017	0.329488	0.243236	0.23253	1.6818	0.866813	1.03685
IPI00216138.6	TAGLN	TAGLN Transgelin	0.64851	0.148919	1.92506	2.38783	0.493082	17.0748	2.76083	0.43712	6.92877	11.0112	17.6733	6.374	10.6871	23.3881	7.34366	0.0200775	0.09281	6.81957	0.0204058	11.6833
IPI00219897.1	ACSL4	Isoform Short of Long-chain-fatty-acid--CoA ligase 4 ligase	11.4169	25.9777	14.6446	11.428	13.7838	3.0329	3.25758	9.23428	6.46791	3.47328	1.51982	2.86513	2.03425	3.99418	2.91925	0.000485299	0.0147732	0.329652	0.00852282	0.172589
IPI00410017.1	PABPC1	Isoform 2 of Polyadenylate-binding protein 1 protein	11.7216	8.74101	7.69329	8.31664	10.1506	7.38962	7.53548	5.97733	7.22301	5.91755	8.87163	5.54928	5.28133	7.45134	5.29085	0.0141556	0.0212818	0.730173	0.0239636	0.695886
IPI00026199.2	GPX3	Glutathione peroxidase 3	0.288491	0.576983	0.697323	0.359808	0.226346	3.27252	1.58964	0.371285	4.50055	1.89632	2.83589	2.86156	1.6629	2.42351	1.15781	0.0221239	0.0558889	5.41208	0.00507896	5.09163
IPI00303452.6	SLC39A14	Isoform 2 of Zinc transporter ZIP14 transporter	13.3966	25.886	10.346	22.5914	53.907	0.31906	2.72622	11.0334	2.55833	2.6885	5.61233	2.98411	0.177908	0.26486	2.23086	0.00702906	0.0486851	0.153222	0.0402132	0.0893549
IPI00219217.3	LDHB	L-lactate dehydrogenase B chain	70.3901	68.6791	90.9121	134.55	132.891	46.6984	44.259	52.2261	67.4198	45.1389	35.083	34.3634	51.9878	49.7078	36.295	0.00143238	0.0264209	0.514135	0.0141428	0.417024
IPI00465070.7	HIST1H3A	HIST1H3H;HIST1H3A;HIST1H3F;HIST1H3B;HIST1H3E;HIST1H3I;HIST1H3J;HIST1H3C;HIST1H3G;HIST1H3D Histone H3.1	128.08	73.6646	71.8094	136.58	116.219	43.2551	9.84028	11.3145	30.5161	10.7786	66.4087	28.4726	38.9432	49.5839	36.6007	0.000130662	0.00163038	0.200825	0.00744258	0.417988
IPI00456429.3	UBA52	Ubiquitin-60S ribosomal protein L40	112.019	115.416	147.105	79.1984	108.413	63.7521	47.5015	47.2781	69.5993	50.0085	40.6928	41.9762	48.8403	63.9823	22.2757	9.43538e-05	0.00381325	0.494776	0.00114772	0.387382
IPI00977865.1	SCP2	non-specific lipid-transfer protein isoform 8 proprotein 8	4.47287	5.36322	4.40609	4.51398	7.56794	1.12865	2.69017	2.29628	1.84025	1.6315	3.1238	2.17558	1.33876	1.24462	2.02301	0.00015086	0.0028652	0.364186	0.00275065	0.3763
IPI00219301.7	MARCKS	Myristoylated alanine-rich C-kinase substrate	9.54801	9.78316	7.10335	9.94382	4.58334	20.3154	16.3736	12.205	24.9627	31.1336	15.4732	12.445	20.2788	23.8861	6.83528	0.0158248	0.015094	2.56313	0.0614104	1.92664
IPI00910202.1	SFRP4	cDNA FLJ53955, highly similar to Secreted frizzled-related protein 4 to	0.16304	0.174174	0.350163	0.22135	0.342862	0.181822	0.184296	0.26977	0.499896	0.396062	0.24367	0.152333	0.219349	0.297632	0.203909	0.437681	0.474931	1.22392	0.585767	0.89238
IPI00008483.1	MAOA	Amine oxidase [flavin-containing] A	0.174803	0.39832	3.4257	3.14051	2.2885	33.6935	10.8928	5.2554	28.848	8.27237	22.0392	11.3459	13.7666	30.4232	24.6668	0.0127295	0.0547315	9.22397	0.00540666	10.8447
IPI00911034.1	BGN	cDNA FLJ59360, moderately similar to Biglycan to	0.444976	0.177538	0.460924	0.443806	0.421236	2.14578	1.61474	1.30396	2.69017	1.72728	1.18871	0.799628	0.13086	0.342577	0.587475	0.000117033	0.00262143	4.86632	0.30455	1.56494
IPI00008603.1	ACTA2	Actin, aortic smooth muscle	0.206441	0.379692	0.207603	0.352501	0.282829	1.60971	0.288052	0.235958	0.979013	0.968752	0.402093	0.265485	0.136616	0.270725	0.148589	0.035637	0.105259	2.85605	0.515553	0.856159
IPI00021812.2	AHNAK	Neuroblast differentiation-associated protein AHNAK	120.051	125.001	179.669	216.362	219.139	183.584	161.479	167.521	185.567	146.962	107.151	144.027	183.114	118.891	115.969	0.186528	0.898837	0.982438	0.177836	0.777885
IPI00456750.2	FAM129B	Isoform 2 of Niban-like protein 1 protein	5.41777	5.58246	10.7339	12.7013	16.3271	3.34499	5.13015	5.45773	5.09966	6.92445	4.14221	4.81388	5.91878	1.45811	6.86852	0.0270952	0.076386	0.511341	0.056976	0.45706
IPI00010414.4	PDLIM1	PDZ and LIM domain protein 1 protein	8.87963	8.9321	13.2186	12.3857	9.8553	11.6746	10.2418	11.5939	19.2916	11.309	11.5602	11.2418	10.4672	13.3985	11.924	0.415912	0.288879	1.20348	0.338448	1.09987
IPI00244391.3	XDH	Xanthine dehydrogenase/oxidase	1.11319	1.15373	2.38403	4.08518	2.17272	0.374776	0.173067	2.06508	0.555593	0.450844	0.151008	0.550723	0.372471	0.43155	0.212583	0.0105619	0.0581823	0.331783	0.0266904	0.157518
IPI00291175.7	VCL	Isoform 1 of Vinculin	49.6011	52.5967	55.1925	67.4993	58.5948	66.4317	50.0362	52.2986	71.442	64.3826	82.8368	64.1643	60.8422	56.0522	51.4679	0.582582	0.440201	1.07445	0.341769	1.11245
IPI00303174.2	HGD	Homogentisate 1,2-dioxygenase	9.22533	12.9511	19.0709	13.4255	20.3534	2.14607	10.0422	18.7212	5.05216	10.8476	4.70763	17.966	5.31843	0.189806	5.51744	0.120946	0.149928	0.623904	0.0555923	0.449168
IPI00026126.1	SCGB2A1	Mammaglobin-B	3.86616	1.80363	6.409	7.64067	24.5134	0.485317	3.3136	3.54086	9.39765	4.09198	0.363367	2.35969	0.766948	0.185617	0.959131	0.118983	0.325621	0.470903	0.12183	0.104781
IPI00794663.1	TUBA4A	cDNA FLJ58687, highly similar to Tubulin alpha-4 chain to	0.331275	0.142516	0.43161	0.464548	0.184795	0.267313	0.391206	0.479333	0.159519	0.29439	0.514128	0.638341	0.252123	0.533737	0.0806602	0.647143	0.932318	1.02381	0.470087	1.2986
IPI00015842.1	RCN1	Reticulocalbin-1	29.6817	48.0012	61.2824	31.361	21.3121	14.4901	18.6022	22.0943	13.1273	18.7927	6.3234	7.23504	17.981	9.44663	7.28788	0.00179732	0.0420313	0.454536	0.0138326	0.251901
IPI00414694.3	COL18A1	Isoform 3 of Collagen alpha-1(XVIII) chain alpha-1(XVIII)	6.75895	7.00167	3.91171	3.90467	1.90224	8.89935	4.42292	14.7057	15.5248	10.6568	11.3294	9.34115	5.75653	5.10248	14.8141	0.055923	0.035281	2.30883	0.0653936	1.97381
IPI00019502.3	MYH9	Isoform 1 of Myosin-9	221.46	189.204	228.904	281.053	257.334	352.921	289.998	260.078	419.608	320.904	325.745	216.182	317.079	380.486	189.795	0.0968241	0.0242255	1.39522	0.249918	1.21336
IPI00396485.3	EEF1A1	EEF1A1 Elongation factor 1-alpha 1	259.718	231.505	210.912	251.445	308.387	171.338	170.97	170.107	269.399	144.037	167.835	144.919	112.291	205.045	115.472	0.00633084	0.0405709	0.733657	0.00249987	0.590794
IPI00789428.1	MCCC2	Isoform 2 of Methylcrotonoyl-CoA carboxylase beta chain, mitochondrial carboxylase	2.08508	3.3985	5.36768	6.79277	4.20761	1.39523	2.2414	4.05753	3.70841	1.99253	1.10811	1.93791	1.23662	1.07661	2.53854	0.0161151	0.121999	0.613001	0.0226239	0.361428
IPI00926626.1	LMCD1	Uncharacterized protein	0.182631	0.274257	0.209555	0.212348	0.142329	1.94666	1.71737	0.232564	1.6915	2.0107	5.14475	1.25972	0.810509	1.52795	0.980507	0.0750616	0.0157933	7.44163	0.0979038	9.52233
IPI00925511.1	QARS	cDNA FLJ54314, highly similar to Glutaminyl-tRNA synthetase to	3.55636	3.97705	1.96373	3.64016	2.86314	0.578986	0.652251	0.332517	0.709611	1.63286	2.57362	3.29391	1.42563	2.12535	2.69503	0.000345246	0.00083455	0.244132	0.140794	0.757075
IPI00014850.4	PEA15	Astrocytic phosphoprotein PEA-15	4.77765	12.7887	19.4541	6.90289	5.96822	1.56168	4.83729	4.98537	0.915543	3.94493	0.248876	0.442577	2.50915	1.34537	0.504141	0.00682458	0.0685607	0.325603	0.0298193	0.101222
IPI00163187.10	FSCN1	Fascin	1.19102	2.16265	0.740001	0.217758	3.87232	0.203162	0.409774	0.336039	1.39271	0.954092	4.13876	0.287732	1.50045	4.05556	1.38367	0.197274	0.21149	0.402722	0.545528	1.38887
IPI00007731.1	BAG5	Isoform 1 of BAG family molecular chaperone regulator 5 family	0.627114	1.03226	1.54692	0.823249	1.92799	0.229315	0.337509	0.619338	0.524458	0.508564	0.260942	0.321859	0.480098	0.536035	0.179356	0.00340408	0.0328944	0.372501	0.022707	0.298494
IPI00942979.1	TKT	Transketolase	45.1264	36.2121	48.0945	47.3306	54.0342	52.295	42.2946	44.0387	56.5988	42.3386	48.2882	47.2257	45.4718	59.3469	38.2318	0.927952	0.750643	1.02932	0.736888	1.03365
IPI00024993.4	ECHS1	Enoyl-CoA hydratase, mitochondrial	50.5311	35.521	38.5538	49.8389	49.2653	15.2972	34.8213	37.9282	24.6856	32.6384	30.9829	20.9329	28.516	27.8306	30.4802	0.0042427	0.0175649	0.649818	0.00309417	0.620189
IPI00479058.2	RPS15	40S ribosomal protein S15	3.01383	2.46007	1.06866	1.01854	0.578545	8.2466	6.09531	7.45134	4.18086	4.28709	12.183	8.73253	8.32875	4.38203	6.12751	0.00135989	0.0028659	3.71776	0.00628727	4.88398
IPI00983658.1	ADK	adenosine kinase isoform d	1.06925	0.633449	0.815637	0.450906	1.14124	0.366783	0.210064	0.514663	0.352013	0.664297	0.163482	0.199505	0.230766	0.175787	0.28634	0.00120376	0.0350386	0.512791	0.00847689	0.256875
IPI00555744.6	RPL14	Ribosomal protein L14 variant	15.6501	10.1246	9.05867	10.0477	12.4883	4.6213	7.80122	5.84013	10.1697	9.56059	15.2739	12.2754	10.7779	15.5431	12.8011	0.00722607	0.0411862	0.66225	0.251022	1.16214
IPI00295741.4	CTSB	CTSB Cathepsin B	4.11673	10.0554	11.5466	8.28499	5.4725	10.2262	9.99634	9.69876	5.4159	10.6428	8.11843	7.55693	3.76435	10.9458	10.6945	0.743044	0.464435	1.16475	0.870108	1.04062
IPI00909703.2	ANXA11	Uncharacterized protein	13.5207	12.9412	19.325	16.9722	18.0147	12.2143	10.945	12.7489	15.7546	14.0101	14.395	10.1218	11.4581	11.331	10.1556	0.0165208	0.0842196	0.813047	0.0169477	0.711389
IPI00657725.2	SLC34A2	Isoform 2 of Sodium-dependent phosphate transport protein 2B phosphate	2.99385	1.15141	1.88832	2.86712	1.72082	1.50828	1.00028	0.605584	2.09377	1.08779	1.14934	1.74352	1.05373	0.345438	1.15125	0.0495841	0.0845284	0.59273	0.0428363	0.512476
IPI00216691.5	PFN1	Profilin-1	69.3296	44.8209	43.2402	55.8661	53.6312	28.3977	42.0578	33.3358	49.5977	48.6073	86.02	53.6609	61.8328	77.1075	44.6689	0.0330269	0.0725457	0.756857	0.24639	1.21133
IPI00060715.1	KCTD12	BTB/POZ domain-containing protein KCTD12	0.715488	0.465064	2.89688	0.841654	0.227952	6.10927	2.29294	1.56103	5.19996	6.06119	3.89278	2.03708	5.069	4.06372	1.82323	0.0219365	0.0254	4.12361	0.0188922	3.28068
IPI00643941.4	PAEP	cDNA FLJ52183, highly similar to Glycodelin to	0.304349	0.215043	0.390881	0.402009	0.515985	102.196	17.5512	0.295863	70.61	9.71087	9.10778	14.81	53.754	111.724	27.0696	0.141534	0.114766	109.592	0.0839686	118.399
IPI00001734.3	PSAT1	Phosphoserine aminotransferase	3.83998	3.45959	6.52781	9.97419	14.7946	0.433739	0.664757	1.73147	5.79095	0.261485	1.47192	0.704953	0.408215	0.137824	1.4283	0.00796144	0.0465593	0.230137	0.030671	0.107555
IPI00032220.3	AGT	Angiotensinogen	0.804966	1.3064	0.727743	1.32143	0.213484	12.8198	13.1802	6.641	11.5859	11.4145	11.3585	19.6833	3.47738	2.97172	1.11884	0.0149666	0.000761511	12.7209	0.119515	8.82705
IPI00013174.2	RBM14	Isoform 1 of RNA-binding protein 14	0.289232	0.302708	0.22255	0.432988	0.27822	0.153456	0.451438	0.328212	0.758226	0.169823	1.50964	0.422903	1.0896	0.322663	1.20197	0.0270673	0.58991	1.21987	0.0576924	2.98012
IPI01012049.1	EHD2	cDNA FLJ53453, highly similar to EH-domain-containing protein 2 to	0.171087	0.827253	1.06814	0.939653	0.350552	6.4585	1.9666	2.18011	2.78157	2.19923	1.81466	1.59273	3.37433	2.48096	1.06829	0.0264557	0.0430649	4.64328	0.0208237	3.07773
IPI00016832.1	PSMA1	Isoform Short of Proteasome subunit alpha type-1 subunit	1.91269	1.50462	2.54365	2.75032	2.1057	2.88886	4.18608	3.91768	4.2228	3.41361	4.66863	2.66161	2.70776	3.73058	2.52696	0.0106869	0.00178073	1.7222	0.0570739	1.50648
IPI00220301.5	PRDX6	Peroxiredoxin-6	37.4995	47.978	57.6121	45.8198	47.4455	22.9512	34.5162	41.7181	36.7176	38.2397	31.6558	22.5226	30.5225	25.2463	20.7897	0.000848665	0.0249901	0.736785	0.000930302	0.553138
IPI00031691.1	RPL9	60S ribosomal protein L9	13.2912	7.38296	6.73697	1.93589	4.99298	0.254793	2.74689	0.677456	2.8351	0.292154	12.2482	9.36449	4.93722	5.67059	4.69134	0.0194777	0.0389715	0.198206	0.834464	1.07489
IPI00003406.4	DBN1	Isoform 1 of Drebrin	0.782249	0.263395	0.400063	0.395761	0.280953	6.51967	4.79889	2.17392	3.09299	7.2899	0.624598	4.01333	3.31085	4.81054	0.113857	0.00688691	0.0108096	11.2491	0.0826283	6.06533
IPI00299000.5	PA2G4	Proliferation-associated protein 2G4	10.0973	8.21636	7.24055	9.97488	12.4839	7.80717	5.75254	5.50789	6.75568	6.75755	11.199	5.3796	7.07093	7.49641	5.72748	0.0555169	0.0225381	0.678583	0.143633	0.767988
IPI00968296.1	ETF1	Uncharacterized protein	1.13438	1.94679	1.55412	1.1433	1.43465	0.742673	0.427886	0.616683	0.874057	0.828285	2.08739	1.63682	1.09293	1.32244	0.778895	0.0125227	0.00450062	0.483775	0.833785	0.959136
IPI00646748.1	TPM2	Uncharacterized protein	1.18009	0.115359	0.842413	2.20794	0.62964	9.53743	3.18988	1.35069	3.0663	5.44677	7.6534	2.83726	4.39024	5.0704	2.20519	0.0468712	0.0658993	4.54051	0.0194851	4.45317
IPI00798401.2	CORO1C	cDNA FLJ50992, highly similar to Coronin-1C to	0.486935	0.125243	0.538717	0.117123	0.390339	1.3567	1.27077	0.305575	0.255767	1.46064	3.46967	1.77769	2.2509	3.02933	1.15021	0.001159	0.0881609	2.80365	0.00757372	7.04179
IPI00010779.4	TPM4	Isoform 1 of Tropomyosin alpha-4 chain alpha-4	52.5566	44.6782	50.9885	66.5977	45.0608	61.3376	62.966	44.9329	57.9325	70.5122	90.8995	38.423	75.8827	64.7721	29.493	0.702132	0.227109	1.14545	0.542986	1.15233
IPI00924816.1	MTPN	Myotrophin	8.73556	12.5134	7.39269	8.06402	10.9117	3.95725	5.50179	5.61505	5.12801	4.95471	4.8239	4.4543	6.3037	6.05909	3.19209	0.00046342	0.00718496	0.528312	0.0052663	0.521514
IPI00852677.1	MUC1	mucin-1 isoform 14 precursor	2.66014	1.64114	1.18567	2.69521	3.87931	0.311111	0.747114	1.12179	0.552712	1.68214	0.510152	0.250087	0.269901	0.197784	1.131	0.00257122	0.0273669	0.366031	0.0112749	0.195575
IPI00246058.10	PDCD6IP	Programmed cell death 6-interacting protein protein	5.01413	6.33656	7.45806	8.13307	11.992	4.97812	5.01205	4.77864	5.70094	4.74695	7.56007	1.86607	6.026	3.9622	3.37152	0.0542069	0.0796424	0.647681	0.0711661	0.585246
IPI00156689.3	VAT1	Synaptic vesicle membrane protein VAT-1 homolog VAT-1	3.71922	2.85621	4.06034	0.790206	4.68192	6.99973	6.90145	4.39511	10.1071	5.33689	10.0067	7.79474	9.96797	8.10662	7.05771	0.0010945	0.0200977	2.09465	0.000361746	2.66539
IPI00295414.7	COL15A1	Collagen alpha-1(XV) chain	0.300701	0.369873	0.997715	1.89908	0.473981	1.59339	3.6833	1.74751	0.173668	2.62079	3.21853	3.54553	1.30279	2.81376	2.3153	0.0364952	0.128101	2.42955	0.00670235	3.26522
IPI01013272.1	CDH13	Cadherin-13	0.255926	0.179418	0.171312	0.21803	0.13654	2.47959	0.26722	0.536556	0.352086	0.474276	1.33265	0.182529	1.28476	1.39455	0.776523	0.137762	0.20569	4.2755	0.0251568	5.17153
IPI00791426.2	RPL24	Uncharacterized protein	7.79311	6.65759	8.42864	8.64341	10.1549	4.46172	5.01865	4.77037	5.87016	4.49805	10.7079	7.67997	4.82624	7.03378	7.87729	0.00739151	0.00203354	0.590699	0.540792	0.914763
IPI00383500.3	FERMT2	Isoform 2 of Fermitin family homolog 2 family	0.194521	0.479998	0.222673	0.178327	0.444021	0.865737	1.87774	1.68448	1.49495	1.74026	0.993574	1.36595	0.366021	1.70752	0.395212	0.00212002	0.001239	5.04308	0.0650184	3.17745
IPI00216308.5	VDAC1	Voltage-dependent ani	31.2547	24.1491	25.5084	40.5379	45.6044	19.7421	21.08	22.3639	36.3454	23.896	37.0679	29.1455	28.6329	26.1257	32.9247	0.179697	0.133057	0.738845	0.590465	0.921237
IPI00294739.1	SAMHD1	Isoform 1 of SAM domain and HD domain-containing protein 1 domain	21.389	34.1876	36.3303	37.2586	36.9448	6.88473	6.31376	2.31081	7.14087	2.3715	14.401	2.70045	12.4132	13.8537	5.81831	3.24271e-06	0.000297774	0.150633	0.00035264	0.296109
IPI01015100.1	PGRMC2	Membrane-associated progesterone receptor component 2 2	4.454	4.3283	4.09681	3.68101	4.79656	2.27048	2.26938	2.46827	3.10695	2.82608	3.2192	4.10192	2.92858	2.71678	3.37269	0.000231539	0.000151011	0.605954	0.0112954	0.765062
IPI00979189.1	CD74	Uncharacterized protein	0.196432	0.109432	0.3822	0.235909	0.283182	0.277854	0.145804	1.15373	0.60613	0.198457	4.60819	0.120341	1.69466	3.69123	0.901126	0.0332683	0.283155	1.97321	0.080995	9.12522
IPI00889541.2	DDX17	Isoform 4 of Probable ATP-dependent RNA helicase DDX17 ATP-dependent	17.3878	15.3387	16.6125	20.2704	21.2973	12.0846	12.7321	12.6766	8.23918	10.6812	18.2915	12.088	16.6852	12.7303	12.3069	0.00290726	0.00146714	0.620568	0.0589984	0.793143
IPI01013193.2	CTSC	Uncharacterized protein	0.24649	0.29072	0.212613	0.207474	0.459043	2.32414	1.07118	0.305427	1.65302	1.53815	2.35447	0.542878	2.49926	2.82745	0.180154	0.0488745	0.0299786	4.86601	0.0627353	5.93375
IPI00479722.2	PSME1	Proteasome activator complex subunit 1 1	16.3804	23.1285	23.0533	22.6667	19.0023	18.251	18.0022	17.7261	18.5019	26.1348	47.6102	35.952	38.9837	27.2673	26.6045	0.00164459	0.608254	0.946127	0.0177868	1.69256
IPI00871858.1	CYB5A	Cytochrome b-5 isoform 1 variant variant	12.5647	12.1746	11.3255	13.3559	19.1185	3.58382	6.58964	19.317	3.78449	7.70342	0.113984	2.60268	4.34393	0.269004	0.923638	0.00279663	0.138739	0.597883	0.000212312	0.120416
IPI01012574.1	ATL3	Uncharacterized protein	2.69802	1.96373	1.83999	2.60142	1.23508	2.83884	2.37265	1.57015	6.17098	0.712272	1.25362	2.92635	0.345965	1.61675	1.62394	0.416811	0.525585	1.32178	0.333135	0.751252
IPI00646182.5	ATP1A1	sodium/potassium-transporting ATPase subunit alpha-1 isoform c isoform	19.0868	16.9369	21.5797	27.625	26.9199	14.2897	16.9287	22.5742	27.8692	18.9628	25.5438	26.4317	16.3407	13.759	20.2086	0.755342	0.488	0.897246	0.562356	0.912042
IPI00032140.4	SERPINH1	Serpin H1	118.291	90.9247	113.229	113.245	110.53	118.382	155.74	112.798	188.341	188.55	103.867	117.474	110.638	98.5374	69.0132	0.0113918	0.0540642	1.39836	0.36676	0.914521
IPI00797270.4	TPI1	Isoform 1 of Triosephosphate isomerase	283.637	214.971	226.568	340.71	311.632	211.821	203.333	211.395	239.885	207.721	348.11	227.512	287.995	238.195	189.506	0.161679	0.064466	0.779776	0.649924	0.937424
IPI00101037.3	RCN3	Reticulocalbin-3	1.3668	0.642291	0.175264	0.423167	0.194589	2.06494	0.886627	0.957338	2.51612	1.11095	2.47735	1.36974	1.30206	1.00007	0.55187	0.089727	0.0482149	2.6894	0.0830599	2.39145
IPI00015856.6	DNPEP	aspartyl aminopeptidase	0.15169	0.236843	0.158406	0.459329	0.251425	2.4163	0.161611	0.956741	0.442178	1.0829	0.335527	1.07885	0.958998	2.50394	1.6115	0.0843084	0.122358	4.02303	0.0441838	5.1593
IPI00908723.1	STOML2	cDNA FLJ61039, highly similar to Stomatin-like protein 2 to	3.55217	2.71001	2.32834	5.00441	4.31183	3.22232	3.15076	5.35134	6.07422	7.17013	5.2267	5.28499	2.64011	2.81454	3.11623	0.283277	0.176196	1.39438	0.768607	1.06566
IPI00157908.4	AIFM1	Isoform 3 of Apoptosis-inducing factor 1, mitochondrial factor	9.37293	8.96684	7.71411	9.59245	7.91286	9.70145	10.0715	10.9086	11.6092	10.4216	14.433	13.2811	12.6714	7.93868	11.1001	0.026181	0.00703929	1.21013	0.0449531	1.36422
IPI00549672.2	PSMD13	HSPC027	0.873512	0.414717	0.592136	0.383341	0.455556	0.224767	0.153467	0.413512	0.787635	0.372161	0.36977	0.17541	0.235582	0.205598	0.244651	0.0808654	0.312415	0.717673	0.0260587	0.4527
IPI00398735.3	CNN2	calponin-2 isoform b	0.234279	0.371208	0.266332	0.272287	0.380482	1.21951	1.30912	1.32097	0.473587	0.207086	2.54735	0.129023	0.16967	1.88322	1.30631	0.148033	0.0625418	2.97147	0.129998	3.95882
IPI00642078.1	TPD52L1	Isoform 4 of Tumor protein D53 protein	4.54002	3.27161	1.59339	4.20673	1.03598	0.885154	1.52668	4.30317	0.285923	0.691595	0.515448	0.997784	1.48875	0.286499	1.03254	0.0782062	0.202418	0.525168	0.0387894	0.294996
IPI00418262.5	ALDOC	Fructose-bisphosphate aldolase	5.21367	8.56468	11.5035	9.60709	14.1969	18.1387	16.2087	9.55132	28.5972	17.1603	5.39304	11.3333	4.67349	15.5841	2.89207	0.0281302	0.0561238	1.82652	0.533195	0.812373
IPI00917605.1	CYCS	Uncharacterized protein	8.15904	5.4298	4.70632	6.6807	7.5879	3.80923	2.15547	3.08784	6.34579	4.50273	5.73185	4.70241	4.06907	4.99921	3.97788	0.0262493	0.0297642	0.611141	0.0461888	0.72106
IPI00479186.7	PKM2	Isoform M2 of Pyruvate kinase isozymes M1/M2 kinase	118.332	127.151	119.271	167.719	181.434	120.718	131.08	128.453	182.241	134.42	189.204	120.718	113.977	176.607	86.9491	0.968652	0.848339	0.976193	0.828723	0.962949
IPI01026124.1	NDRG2	30 kDa protein	2.34697	2.44426	1.73965	0.40023	1.72692	0.276126	0.863459	2.49822	0.544952	0.338611	0.150998	0.174464	0.136436	0.377095	0.210662	0.0179656	0.171318	0.522216	0.0135208	0.121235
IPI00220739.3	PGRMC1	Membrane-associated progesterone receptor component 1 1	15.0898	11.545	10.4404	12.4761	8.4961	4.34393	3.91442	5.1978	8.53387	4.98364	4.20819	6.88616	3.1225	1.48937	5.06057	0.00025548	0.0022794	0.464683	0.000865281	0.357756
IPI00977773.2	TPP1	cDNA FLJ59472, highly similar to Tripeptidyl-peptidase 1 to	4.66831	3.6856	6.42858	4.67835	3.67336	8.12068	4.8733	5.57936	6.32603	8.06291	4.1563	5.27109	9.62109	9.26056	4.89056	0.183773	0.0462725	1.42483	0.167004	1.43509
IPI00216088.3	CRABP2	Cellular retinoic acid-binding protein 2 2	0.104777	1.34714	0.386891	0.188417	1.72178	0.652975	0.227778	0.292884	0.637634	0.293331	0.357595	0.415379	0.641357	0.268725	0.150632	0.381901	0.38337	0.561376	0.315182	0.489113
IPI00848161.1	SNORD84	Isoform 1 of Spliceosome RNA helicase	23.1141	14.6517	14.97	11.6803	13.5517	9.33338	8.29016	9.10147	7.85385	8.33741	13.1756	9.45187	9.04174	9.80488	11.1217	0.00456711	0.0227233	0.550436	0.0593976	0.674584
IPI00908511.1	CAPG	cDNA FLJ51488, highly similar to Macrophage capping protein to	3.06928	3.43783	3.47955	3.38909	3.61952	5.14154	4.24334	5.26926	5.08131	5.03398	7.55902	5.44488	5.2014	8.11786	3.77846	0.00720237	0.000288198	1.45743	0.0300526	1.77118
IPI00010133.3	CORO1A	Coronin-1A	1.527	0.866697	3.32995	1.58777	2.09972	2.8349	3.30557	1.71523	4.3349	3.0199	25.3357	5.0933	4.69036	15.5949	5.24812	0.0342758	0.0843475	1.61622	0.0847786	5.9464
IPI00419585.9	PPIA	Peptidyl-prolyl cis-trans isomerase A	183.228	126.413	118.529	131.571	145.462	44.2774	66.3857	59.2277	96.0424	94.7202	102.445	59.557	118.029	137.511	85.4732	0.00458524	0.00204368	0.511417	0.0514008	0.71329
IPI00290566.1	TCP1	T-complex protein 1 subunit alpha alpha	12.119	7.83536	8.51909	11.0839	8.94202	6.40146	6.18897	8.16923	5.84377	7.45496	7.43689	8.97866	7.209	8.00666	6.71785	0.0115917	0.019723	0.702243	0.0671055	0.790712
IPI00019755.3	GSTO1	Glutathione S-transferase omega-1	5.03782	3.95479	3.42879	4.67414	5.25066	4.66863	5.10496	3.73187	6.42279	6.39126	8.18113	4.96984	9.73513	6.27189	4.29542	0.106686	0.240508	1.17781	0.0925228	1.49705
IPI00968174.1	IQGAP2	Uncharacterized protein	1.45579	1.57997	1.17731	0.244516	0.415235	0.138763	0.309583	0.199727	0.392727	0.296006	0.162229	0.154513	0.180754	0.335504	0.195779	0.00931518	0.0594812	0.274339	0.0471817	0.211126
IPI00009342.1	IQGAP1	Ras GTPase-activating-like protein IQGAP1	50.6047	54.0117	86.205	90.4219	78.8315	74.9938	71.4667	76.3682	91.2973	83.3032	96.109	73.7208	66.4087	76.942	60.7663	0.701674	0.441257	1.10374	0.793887	1.03853
IPI00967150.1	ANK3	ankyrin-3 isoform 3	0.808377	3.45144	1.32161	1.272	3.62379	0.733821	0.143349	0.6952	0.361784	0.729814	0.492945	0.637369	0.163391	0.196051	0.717574	0.0107108	0.0574895	0.254263	0.0488665	0.210679
IPI00465044.2	RCC2	Protein RCC2	0.736011	0.152101	0.176238	0.271872	0.249671	0.404329	0.317868	0.536667	0.335062	0.708284	0.292823	0.350746	0.382306	0.396062	0.150632	0.359937	0.305004	1.45168	0.982502	0.991598
IPI00879904.1	TUBAL3	Isoform 2 of Tubulin alpha chain-like 3 alpha	0.227462	0.589637	0.521558	0.809835	0.449533	1.36122	1.0921	0.886505	1.58502	1.93067	4.08745	8.94264	0.850215	0.396475	2.94058	0.0977333	0.00617421	2.63874	0.128896	6.62709
IPI00017334.1	PHB	Prohibitin	22.4618	22.9417	31.3588	27.0564	34.9907	18.0472	22.1157	26.3531	33.0528	30.211	22.717	21.8158	19.6683	16.9851	17.1246	0.0548482	0.631994	0.934949	0.0247119	0.708243
IPI00873923.1	TGFBI	Uncharacterized protein	0.33901	0.458725	0.216179	0.734381	0.309626	1.70362	2.5433	0.147052	1.92746	1.87957	0.582448	0.56288	1.83299	0.518818	1.04145	0.0265686	0.0352775	3.98509	0.120557	2.20543
IPI01010990.1	LGALS3BP	cDNA FLJ53478, highly similar to Galectin-3-binding protein to	4.47318	4.20061	5.93316	8.3513	9.02483	13.2159	7.75056	6.30502	12.2346	9.63978	10.145	9.27598	10.5422	4.99956	5.40352	0.158253	0.0716275	1.53662	0.311146	1.26211
IPI00012007.6	AHCY	Adenosylhomocysteinase	29.7249	19.8449	24.1257	31.3176	49.3063	23.726	21.9097	27.1523	27.0714	27.792	32.4152	30.6667	21.5199	28.9743	25.7678	0.514033	0.355541	0.82719	0.602282	0.902958
IPI00334282.2	FAM3C	Protein FAM3C	1.42553	1.26681	1.2422	1.96591	0.321413	4.80055	4.45276	3.38651	6.58645	4.96571	5.33763	7.79636	4.3268	5.10815	8.98613	0.000233977	0.00083061	3.88822	0.00331622	5.07164
IPI00216057.6	SORD	Sorbitol dehydrogenase	16.8258	9.93417	31.3328	18.6823	60.7916	17.9598	30.818	46.4369	17.3661	25.8555	11.0005	27.1316	26.7562	5.59408	14.455	0.439817	0.987235	1.00632	0.334141	0.617427
IPI00514399.1	RPS27	Uncharacterized protein	1.0184	1.51698	0.99903	1.69408	1.24902	1.173	1.78807	0.330632	1.41716	1.13895	0.912819	0.818639	0.287374	0.387535	0.379534	0.0255492	0.663324	0.902786	0.00434089	0.430089
IPI00644531.1	TAGLN2	21 kDa protein	36.2146	27.3278	47.63	62.069	51.8115	61.9143	59.9214	53.6089	65.6398	55.9668	78.0864	61.083	56.403	55.8467	57.5403	0.0410628	0.0752917	1.31992	0.0560512	1.37283
IPI00216298.6	TXN	Thioredoxin	56.815	39.5033	47.1276	43.9899	50.8544	39.1408	27.2333	28.6368	51.2827	28.3367	48.3485	34.6264	46.9776	38.6367	27.7747	0.100498	0.054383	0.732847	0.124528	0.824054
IPI00215628.1	VCAN	Isoform V1 of Versican core protein core	0.965468	0.441504	1.81328	1.62225	0.290498	14.0783	16.4658	7.00265	26.9311	15.9956	5.98023	6.85046	13.4329	22.6965	10.4984	0.00355344	0.00895436	15.6776	0.0222042	11.5836
IPI00646889.1	C10orf58	Uncharacterized protein	28.611	38.0045	23.4156	26.9871	27.7401	12.227	15.4304	22.0163	32.4782	19.8381	15.2221	9.73041	13.1501	13.0448	7.34723	0.00178145	0.0820979	0.704553	0.000664056	0.404085
IPI00847774.2	RPL18A	cDNA FLJ51501, highly similar to 60S ribosomal protein L18a to	2.82608	2.49217	1.24643	2.83255	2.45496	1.91587	2.54806	2.88406	4.0815	2.86473	3.62681	6.78759	3.72051	4.55673	4.99367	0.00460874	0.317994	1.20604	0.0105064	1.99839
IPI00008037.1	ACSL5	Isoform 1 of Long-chain-fatty-acid--CoA ligase 5 ligase	40.4509	30.1023	52.0418	48.476	64.5256	21.2693	31.5813	39.7477	28.7661	18.3715	11.424	22.921	25.4342	12.7878	21.6231	0.00177442	0.0276396	0.593115	0.00486302	0.399794
IPI00018465.1	CCT7	T-complex protein 1 subunit eta eta	14.5415	12.1628	13.33	12.6144	18.6422	9.811	12.5891	10.6886	14.9192	9.79877	15.257	14.7956	11.7566	9.92247	10.2845	0.242361	0.116089	0.810857	0.284065	0.869905
IPI00218200.8	BCAP31	B-cell receptor-associated protein 31	1.84318	1.9103	2.06079	2.55248	5.04062	1.49309	1.0122	1.29675	1.14854	1.13014	2.15173	3.24024	1.47949	1.42425	2.1655	0.0669605	0.0713376	0.453535	0.422489	0.780258
IPI00300299.6	SPCS3	Signal peptidase complex subunit 3 3	0.736164	0.464226	0.189885	1.00222	1.67354	0.224362	0.207689	0.470739	0.284047	0.746131	2.17347	1.31531	1.16999	1.47315	0.88093	0.01268	0.177055	0.475394	0.116208	1.72474
IPI00736251.2	PPM1H	Protein phosphatase 1H	1.95626	3.51665	8.02332	2.91946	2.71603	0.416244	2.7706	1.74038	0.250208	0.426554	0.188104	0.369898	1.05841	0.167915	2.22484	0.0222042	0.0657384	0.292916	0.0458685	0.209556
IPI00027462.1	S100A9	Protein S100-A9	2.62788	0.182226	1.03519	0.279012	0.33779	0.273592	4.0564	3.59552	3.36126	0.788072	2.68161	2.98121	2.55673	11.5707	1.44623	0.178523	0.140452	2.70609	0.145192	4.75929
IPI00064666.1	FAM84B	Protein FAM84B	0.347359	0.445501	0.185475	0.718171	0.396337	0.282241	0.224751	0.475165	1.72238	0.358837	1.23482	1.6769	1.31039	0.53189	1.30949	0.0403795	0.539291	1.46374	0.00945615	2.89725
IPI00871988.2	SFXN3	cDNA FLJ58980, highly similar to Sideroflexin-3 to	0.198265	0.160073	0.258798	1.26497	0.248342	1.55455	0.576903	0.113952	3.33226	1.34826	3.68356	3.45456	1.04225	0.842822	1.36377	0.0981598	0.163738	3.25093	0.0527806	4.87549
IPI00219005.3	FKBP4	Peptidyl-prolyl cis-trans isomerase FKBP4	7.82505	6.97358	5.68713	7.69115	3.26617	3.88927	2.03806	3.14858	2.90835	2.59242	0.609839	0.635384	2.58166	2.16986	0.112453	0.000185268	0.013116	0.463589	0.0016767	0.194294
IPI00305692.5	TXNL1	Thioredoxin-like protein 1	3.95232	3.06036	2.99904	2.78736	4.14135	2.41546	0.969962	3.86027	2.69129	2.50446	3.22903	3.97182	3.94138	4.81956	3.45144	0.0429151	0.140038	0.734423	0.237988	1.14597
IPI00556459.2	SERPING1	cDNA FLJ58564, highly similar to Plasma protease C1 inhibitor to	4.38568	5.3247	6.6318	8.93644	8.28556	24.713	13.1464	6.0189	27.9582	22.618	45.4088	30.1963	16.3181	13.3447	11.9373	0.0501481	0.0381876	2.81415	0.0579608	3.49197
IPI00022433.5	HSPB6	Heat shock protein beta-6	0.890569	1.75054	1.71024	3.795	0.914782	3.85813	4.83964	0.813548	3.9776	10.3675	2.75395	2.46861	3.85599	8.80303	2.86056	0.211073	0.1328	2.63283	0.126524	2.28913
IPI00219688.2	PKP2	Isoform 1 of Plakophilin-2	3.56376	2.93773	3.17422	3.85786	7.12999	0.145199	2.94997	3.05993	0.494691	0.13792	0.570936	1.73893	2.05025	0.544461	1.37669	0.00950633	0.0267453	0.328487	0.01621	0.303978
IPI00304962.4	COL1A2	Collagen alpha-2(I) chain	80.3485	70.9288	69.8215	112.252	67.4993	33.982	60.6191	115.56	137.635	77.1931	199.121	228.286	148.457	100.35	124.043	0.0143894	0.821675	1.06022	0.0245048	1.9964
IPI00257508.4	DPYSL2	Dihydropyrimidinase-related protein 2	13.5987	18.7303	24.8436	26.4409	23.2571	40.1131	25.1886	16.5964	33.6702	30.5394	34.1828	25.9237	24.5117	30.6348	23.4237	0.170513	0.135849	1.36715	0.0741734	1.29761
IPI00300074.4	FARSB	Phenylalanyl-tRNA synthetase beta chain	5.49264	1.38828	1.96878	2.11946	3.14008	0.999446	1.18707	1.44583	1.65153	1.12475	2.77118	1.58667	1.17243	1.44143	1.48658	0.0824891	0.100526	0.454214	0.203628	0.599486
IPI00472448.1	HLA-B	Isoform 1 of HLA class I histocompatibility antigen, A-11 alpha chain	3.25758	1.30197	8.24203	4.03845	2.36395	8.6512	18.4711	8.14831	19.7147	26.0642	24.9385	5.63689	26.9628	42.9981	9.27791	0.0368303	0.0196235	4.22046	0.053265	5.7183
IPI00011937.1	PRDX4	Peroxiredoxin-4	14.8624	8.97368	14.5133	10.822	17.7089	4.46481	9.79741	12.3146	14.461	8.53209	2.21576	10.4694	4.92868	4.46296	6.96199	0.0160317	0.171779	0.741175	0.00678197	0.43419
IPI01015038.1	CCT4	T-complex protein 1 subunit delta delta	18.5944	11.7705	15.2962	12.5169	15.9491	10.1022	10.9488	9.97488	15.2021	9.07942	9.59977	7.33959	10.0603	12.2967	9.96383	0.0147145	0.0509955	0.746117	0.0119323	0.664538
IPI00645078.1	UBA1	Ubiquitin-like modifier-activating enzyme 1	113.017	99.5811	117.271	96.3959	122.005	75.615	80.5828	85.4199	91.1961	90.1465	69.807	73.7106	95.6438	70.1174	55.4417	0.000734743	0.00416007	0.771445	0.00238511	0.66522
IPI00619900.2	AP2M1	Isoform 2 of AP-2 complex subunit mu complex	0.265319	0.250069	0.258297	0.22933	1.3027	0.328371	0.220982	0.217879	0.705393	0.433259	1.24487	3.02346	0.27938	0.851218	1.21917	0.0816435	0.740112	0.826593	0.142154	2.87031
IPI00006579.1	COX4I1	Cytochrome c oxidase subunit 4 isoform 1, mitochondrial 4	7.48914	9.12232	6.02057	9.18258	12.4727	4.50492	4.64829	5.78373	5.02945	5.58904	7.57423	4.9833	5.31474	5.63885	7.20351	0.00765177	0.0234504	0.577037	0.0653674	0.693531
IPI00217468.3	HIST1H1B	Histone H1.5	57.1111	72.5146	63.1977	76.0723	112.104	47.5674	39.1028	35.3711	77.6223	51.2081	55.9707	52.6587	65.7172	59.7307	47.5048	0.0616059	0.0661929	0.658456	0.107349	0.73906
IPI00030059.1	GNG10	Guanine nucleotide-binding protein G(I)/G(S)/G(O) subunit gamma-10 subunit	0.244601	0.212053	0.202712	0.66485	0.348783	1.39021	0.257296	0.168078	0.614293	1.3724	2.60088	2.47324	0.402762	1.79988	2.52923	0.00492475	0.187997	2.27273	0.0158773	5.86133
IPI00940851.1	ELAVL1	ELAV-like protein 1	9.42962	5.03398	4.89158	7.40603	7.67305	3.54995	3.35265	5.23468	1.93428	2.13909	8.31203	6.54912	5.83365	5.49036	6.05867	0.0042683	0.00986337	0.470771	0.673421	0.936388
IPI00009771.6	LMNB2	Lamin-B2	21.2531	19.3989	19.5704	19.8298	17.666	30.3285	18.341	18.5121	19.603	19.5541	30.5563	21.7554	20.7351	16.6045	23.9923	0.512681	0.499661	1.08822	0.241923	1.16297
IPI00013976.4	LAMB1	Laminin subunit beta-1	0.644655	3.10868	1.17519	2.97028	1.14258	13.6601	6.57367	5.2267	5.32839	18.0384	4.37323	4.73512	5.03922	7.65764	4.8239	0.0121224	0.0357408	5.40042	0.00213446	2.94524
IPI00983417.1	CD59	Uncharacterized protein	0.349339	0.30437	0.440679	0.1626	1.22782	0.401925	1.39745	0.431191	0.689012	1.03211	1.92639	0.990343	0.561789	2.52013	1.2836	0.0529302	0.303729	1.59034	0.04976	2.93071
IPI00646304.4	PPIB	Peptidyl-prolyl cis-trans isomerase B	57.7961	56.6341	51.7864	73.1	68.6553	59.0883	37.8941	32.9293	60.0378	59.0842	99.45	65.6307	62.7481	71.3183	76.5855	0.0242641	0.142998	0.808624	0.122052	1.22002
IPI00021854.1	APOA2	Apolipoprotein A-II	27.3923	26.6304	9.95899	25.0963	5.83042	21.9904	25.9687	15.9181	53.3161	16.5838	0.189373	17.4493	0.25242	3.88254	0.225703	0.0286045	0.37914	1.40954	0.0356917	0.231796
IPI00291483.4	AKR1C3	Aldo-keto reductase family 1 member C3 member	0.519502	0.934781	0.351525	0.653836	0.976505	0.393599	0.275209	0.227006	0.437362	0.190677	0.229156	0.285785	0.288751	0.183188	0.265282	0.00278738	0.0295487	0.443477	0.0208201	0.364409
IPI00550689.3	C22orf28	tRNA-splicing ligase RtcB homolog	8.42105	7.67571	9.02358	5.22453	9.76893	9.10905	6.026	8.07857	8.33279	5.91181	5.76492	2.47358	6.98471	3.12618	3.37269	0.0111098	0.614336	0.933799	0.0135466	0.541511
IPI00298281.4	LAMC1	Laminin subunit gamma-1	0.357943	0.302792	2.52206	6.99731	5.05987	19.6928	10.8378	9.58847	16.7745	27.3752	15.3589	15.6295	12.0779	16.2549	12.6538	0.00110032	0.00950975	5.52947	0.000192667	4.72278
IPI00007067.5	GLIPR2	Golgi-associated plant pathogenesis-related protein 1 1	0.122029	0.315738	0.490559	0.740463	0.165488	1.24083	0.81214	0.675674	0.217366	0.871819	1.33219	0.745252	1.18452	1.039	0.725074	0.0181262	0.0881846	2.08138	0.00476803	2.74006
IPI00550918.2	COL14A1	Isoform 2 of Collagen alpha-1(XIV) chain alpha-1(XIV)	9.75607	6.96247	12.1442	0.420652	5.60261	4.64443	9.98872	10.4302	9.16033	14.1576	21.1268	18.6073	6.38639	3.8029	8.94264	0.40959	0.315007	1.38684	0.268794	1.68738
IPI00293867.7	DDT	D-dopachrome decarboxylase	7.19203	5.03154	5.31437	5.37625	4.39359	3.67081	3.50132	5.25613	4.39664	4.59288	5.74896	6.29977	3.74691	3.77088	4.74892	0.210301	0.0752072	0.78431	0.414225	0.890421
IPI00964937.1	2016-09-11	Uncharacterized protein	5.03747	2.28517	2.69297	4.14882	2.87488	4.73774	3.17422	4.43551	5.40539	3.55784	7.48706	5.22742	4.68939	5.52318	6.16756	0.0104408	0.228478	1.25068	0.00900158	1.7075
IPI00010120.4	CTBP2	C-terminal-binding protein 2	0.192003	0.285824	0.260689	0.336318	0.468558	0.680751	0.334737	0.451344	0.599778	0.452284	0.198292	0.139101	0.270819	0.277412	0.16527	0.00268207	0.0362958	1.63205	0.11343	0.680898
IPI00783594.3	RNPS1	Isoform 3 of RNA-binding protein with serine-rich domain 1 protein	0.366275	0.454925	0.575784	0.441749	0.395788	0.515663	0.609078	0.796585	1.18962	0.688534	0.611066	0.263925	0.545329	0.514806	0.257671	0.0275832	0.0532481	1.70035	0.922815	0.981327
IPI01020958.1	AK2	Uncharacterized protein	4.10505	3.59502	2.92797	4.23599	4.42354	1.57233	0.831507	4.05781	2.50846	2.03566	5.5782	3.97209	3.67642	3.12943	3.92611	0.0168517	0.0343525	0.570614	0.696974	1.05157
IPI00607796.2	HN1L	cDNA, FLJ79413, highly similar to Hematological and neurological expressed 1-like protein to	1.09962	1.01508	0.803628	1.35717	0.297467	2.02006	1.37984	0.160328	5.0697	1.75163	1.38262	1.72536	2.74594	1.10581	1.66705	0.288134	0.229409	2.2702	0.0446857	1.88647
IPI00006980.1	C14orf166	UPF0568 protein C14orf166	4.15976	3.20561	3.83785	2.79142	3.07034	2.13509	2.17196	2.01559	1.65393	2.51821	1.73363	1.25223	2.18722	2.08725	0.826164	0.000289264	0.00359056	0.614989	0.00108379	0.473865
IPI00045503.1	PPP1R14A	Isoform 2 of Protein phosphatase 1 regulatory subunit 14A phosphatase	0.170791	0.154899	0.174162	0.186584	0.201423	0.300576	0.330426	0.860174	1.9441	2.10964	0.451845	0.262739	0.203162	0.519574	0.219608	0.0291192	0.0746029	6.24527	0.0756304	1.86621
IPI00294159.3	SLC25A1	Tricarboxylate transport protein, mitochondrial	9.15272	11.1479	10.4057	12.0913	13.7905	2.7467	6.93214	7.39474	10.6361	4.18811	12.5438	14.8244	7.37478	5.08871	9.93555	0.0621975	0.0187484	0.563684	0.504132	0.879464
IPI00185038.3	DUOX1	Isoform 1 of Dual oxidase 1 oxidase	5.42905	0.500971	6.05951	2.84002	3.30672	0.408413	0.370848	2.83805	0.542953	0.554785	0.386704	1.90646	0.268892	0.231278	0.0931113	0.0134911	0.0521603	0.259979	0.0340186	0.159154
IPI00215920.8	ARF6	ADP-ribosylation factor 6	1.34257	1.02207	0.91675	0.71663	0.997646	0.288751	0.267109	0.144506	1.28449	0.217186	1.29657	0.556981	0.836942	0.720665	0.842939	0.0609604	0.0572168	0.440791	0.379936	0.851556
IPI00384542.4	NID1	Isoform 2 of Nidogen-1	8.27581	9.87513	12.3882	10.9397	1.49827	15.0032	8.81891	10.5597	15.5528	11.9837	13.7685	14.7455	7.02598	9.51761	13.7361	0.23156	0.142168	1.44073	0.227936	1.36802
IPI00946527.1	AKR7A2	35 kDa protein	2.83098	3.60126	3.08143	1.73724	3.07482	1.69302	1.77436	1.08704	1.61183	1.22654	1.46348	1.06866	1.88074	1.63331	0.826622	0.000761276	0.00758374	0.51605	0.00502965	0.479753
IPI00022891.3	SLC25A4	ADP/ATP translocase 1	0.908148	0.676424	0.578946	1.11427	0.7142	0.149343	0.338822	1.05139	0.370309	0.401146	0.94442	1.25284	0.569908	0.473816	1.0329	0.123219	0.10742	0.578912	0.755711	1.07061
IPI00221226.7	ANXA6	Annexin A6	22.5163	19.6138	19.5826	17.024	13.2848	40.4705	36.464	22.684	41.5046	35.8599	75.2229	28.5734	35.0684	38.7225	18.091	0.0671472	0.00439143	1.92328	0.0985355	2.12644
IPI00295400.1	WARS	Isoform 1 of Tryptophanyl-tRNA synthetase, cytoplasmic synthetase,	15.9259	11.977	21.2944	27.2107	32.386	11.9116	21.8218	24.2733	18.0609	18.1664	14.6487	12.2805	25.9633	18.4609	14.597	0.527747	0.516869	0.86617	0.334944	0.790029
IPI00644936.1	GNAS	Isoform 3 of Guanine nucleotide-binding protein G(s) subunit alpha isoforms short nucleotide-binding	1.53241	1.31987	1.4872	1.06585	2.14058	1.42701	1.38137	1.40133	2.15412	1.14472	1.7463	1.58326	1.56027	2.04769	0.435668	0.992734	0.976573	0.995051	0.918787	0.977112
IPI00553177.1	SERPINA1	SERPINA1 Isoform 1 of Alpha-1-antitrypsin	176.938	131.489	177.823	181.723	107.233	447.021	351.48	337.537	493.088	357.327	516.026	463.171	171.231	269.717	136.136	0.0125788	0.000458358	2.56248	0.110532	2.00757
IPI00002745.1	CTSZ	Cathepsin Z	0.167752	0.19544	0.147287	0.280078	0.124085	0.99385	0.213899	1.4799	0.573911	0.594851	0.17541	0.513879	1.54671	0.648779	0.933162	0.067671	0.0521394	4.21631	0.0650439	4.17424
IPI00843765.1	SPTAN1	Isoform 3 of Spectrin alpha chain, brain alpha	21.1224	14.7118	18.2206	19.9249	21.8067	30.4211	18.9996	20.8128	26.6211	25.3673	47.6565	34.1639	30.8009	21.9843	21.4068	0.0529437	0.0663197	1.27599	0.064513	1.62875
IPI00472222.1	HLA-B	HLA class I histocompatibility antigen, A-74 alpha chain	1.25102	0.0700001	0.374932	0.324637	3.62404	1.66705	3.51445	2.41898	6.5714	8.20669	20.1094	5.52816	2.84929	8.15169	2.28675	0.112085	0.0553811	3.96458	0.110095	6.89599
IPI00922108.2	ITGAV	integrin alpha-V isoform 2	0.181973	0.206713	0.263651	0.557251	0.207819	0.30602	0.251303	0.155501	0.290961	0.507366	0.134241	0.449907	0.604201	0.297632	0.266369	0.787787	0.84114	1.06614	0.548378	1.23631
IPI00009901.1	NUTF2	Nuclear transport factor 2	3.37339	3.44451	2.01601	2.91642	3.08335	1.93214	1.99336	2.38056	3.12488	1.39368	5.4634	3.51226	2.25934	3.82643	2.273	0.115461	0.0710929	0.729732	0.470232	1.16859
IPI00293242.1	GTF2I	Isoform 2 of General transcription factor II-I transcription	4.16524	3.09577	3.35334	5.37774	0.353946	0.215626	0.251617	5.17838	0.65198	0.3021	0.204702	0.607392	4.9239	0.263176	0.202979	0.242586	0.16571	0.403749	0.141474	0.379428
IPI00944977.1	ALCAM	cDNA, FLJ79012, highly similar to CD166 antigen to	3.92121	8.63742	5.83568	2.74784	4.72168	0.135964	3.39097	10.9079	0.352452	1.31677	1.37383	1.34378	2.62206	0.39461	1.24833	0.168262	0.418189	0.622647	0.0164235	0.269976
IPI00219861.3	ACP1	Isoform 1 of Low molecular weight phosphotyrosine protein phosphatase molecular	1.14655	1.17756	1.03994	1.48545	1.76749	0.356902	1.14671	0.754033	0.449253	0.596544	1.94288	1.03663	1.4962	0.83024	1.1599	0.0192755	0.00884946	0.499236	0.901811	0.977159
IPI00953696.1	GSR	glutathione reductase, mitochondrial isoform 4 precursor 4	8.48315	3.01154	2.31257	4.06484	3.40652	0.286062	1.84945	1.12124	1.67215	1.99322	4.61362	4.24099	2.19786	1.88113	3.6065	0.0456954	0.0566396	0.325309	0.468259	0.777311
IPI00292020.3	SRM	Spermidine synthase	0.288271	0.112946	0.391287	0.246336	0.262884	0.544612	0.277085	0.687819	0.306934	0.256459	1.05563	0.405732	0.680327	0.575186	0.786544	0.00934203	0.161566	1.59243	0.0119538	2.69136
IPI00976562.1	UQCRB	cytochrome b-c1 complex subunit 7 isoform 2 7	1.13069	0.659937	1.83083	1.62574	1.01755	1.13288	1.38549	0.981527	2.19375	1.69138	0.32599	0.256228	1.05856	1.17585	0.443898	0.0403946	0.479694	1.17882	0.0694708	0.520455
IPI00007812.1	ATP6V1B2	V-type proton ATPase subunit B, brain isoform B,	0.176446	0.104981	0.114174	0.336295	1.70043	1.42998	0.342102	0.472668	0.389582	0.194185	3.7061	2.3923	2.30553	3.87931	1.9	0.000265897	0.839531	1.16289	0.00192241	5.83114
IPI00470528.5	RPL15	RPL15 60S ribosomal protein L15	10.9374	10.3131	5.39566	8.54393	6.01223	15.6544	10.9086	15.1055	14.2018	11.2504	16.0667	21.6006	13.5329	12.7092	16.7339	0.00241975	0.00840854	1.62905	0.00418492	1.95725
IPI00157144.2	GYS1	glycogen [starch] synthase, muscle isoform 2 isoform	3.64672	1.91229	0.724622	1.39523	1.80313	0.29187	0.259697	1.90409	0.72608	1.93589	0.142408	0.247071	0.154942	0.180917	1.28218	0.0470414	0.194476	0.539721	0.0333121	0.211719
IPI01022358.1	TUBA1A	Alpha-tubulin	14.0422	10.0116	4.94647	5.43319	7.25211	1.41137	3.36126	2.28739	12.3069	2.86414	12.33	29.5155	14.5919	5.27328	11.0548	0.06903	0.174793	0.533304	0.211456	1.74558
IPI00877964.1	APOL2	Apolipoprotein L2	1.5195	1.80675	6.09278	4.71024	3.99224	0.373169	2.60647	2.64341	0.516128	2.04769	1.6874	2.8481	1.42474	0.165374	2.29803	0.0777594	0.0920744	0.451776	0.0952378	0.464842
IPI00554521.2	FTH1	Ferritin heavy chain	9.92454	12.33	15.2105	11.5386	14.2166	12.7489	8.79388	11.992	12.6617	8.32933	10.8626	25.8107	16.2921	11.877	10.2717	0.319981	0.234246	0.862474	0.471273	1.18813
IPI00419263.4	ECI2	enoyl	5.63494	10.0116	13.0348	6.49217	13.1455	2.14518	2.9839	7.02842	4.81688	2.57683	1.54414	2.44816	3.6331	0.395185	13.1802	0.0579027	0.0180259	0.404627	0.0922645	0.438766
IPI00219038.9	H3F3A	H3F3A;H3F3B;H3F3AP6;H3F3AP4 Histone H3.3	74.028	32.9384	97.2617	50.4786	225.409	137.616	338.615	220.22	0.448164	0.336132	6.98761	0.262957	0.276835	0.294941	3.89089	0.1059	0.576253	1.45222	0.0515317	0.0243967
IPI00021855.1	APOC1	Apolipoprotein C-I	0.335271	0.211496	1.6037	2.11609	0.247929	1.94666	1.84242	1.26321	5.50369	2.61371	4.10704	3.22657	0.190175	0.377461	0.281011	0.244727	0.0866645	2.91721	0.462185	1.81245
IPI00465439.5	ALDOA	Fructose-bisphospha	60.5519	52.4947	53.7764	68.1386	83.0553	66.9726	48.198	44.5329	75.3012	63.2196	116.695	66.9773	71.7049	89.2574	55.0053	0.187687	0.636531	0.937763	0.225367	1.25666
IPI00022395.1	C9	Complement component C9	0.223772	0.232629	0.460126	0.507648	0.245467	3.60225	2.81435	2.15606	7.58369	2.71923	5.20717	2.56917	0.352672	0.374958	0.112563	0.0314214	0.0244502	11.3052	0.22883	5.16071
IPI00465361.4	RPL13	60S ribosomal protein L13	23.5981	21.0056	16.0667	18.0197	18.4315	14.1379	15.3695	13.5931	19.0722	12.0637	29.0245	17.9213	16.2707	18.0072	18.4878	0.0999256	0.0320058	0.764367	0.850949	1.02667
IPI00793102.1	RPL35A	Uncharacterized protein	3.90061	0.663101	0.191405	0.647387	0.869043	0.486159	4.87803	5.52318	6.61252	3.39427	5.46416	6.04566	3.85064	5.32876	4.41343	0.0106774	0.053771	3.33158	0.00234257	4.00263
IPI01014268.1	COX7A2	Cytochrome c oxidase subunit 7A2, mitochondrial 7A2,	15.2665	11.7819	6.27885	10.217	11.7991	5.79939	6.60748	5.87016	11.8606	4.69427	9.43681	10.5964	9.17495	8.6566	6.08265	0.0895108	0.0664102	0.629378	0.213122	0.794086
IPI00293434.2	SRP14	Signal recognition particle 14 kDa protein kDa	6.53823	19.9622	14.6446	12.9224	15.7251	10.3324	10.5334	10.3374	13.5667	13.7313	2.70551	2.97812	12.2695	4.47845	2.4463	0.00812107	0.376377	0.838215	0.0144873	0.356454
IPI00293276.10	MIF	Macrophage migration inhibitory factor	44.5854	23.3152	29.3563	38.1523	39.5553	15.2994	21.1443	22.4027	29.0104	26.8509	23.68	26.6581	21.4693	18.5057	25.5402	0.0130394	0.0328673	0.655605	0.0328552	0.662153
IPI00011604.2	GCSH	Glycine cleavage system H protein, mitochondrial protein,	0.294104	0.15602	0.286241	0.345846	0.0850762	0.722015	1.14266	0.361684	0.294492	1.35933	0.212775	0.157247	0.255218	0.30338	0.273441	0.0143144	0.0595449	3.32411	0.903129	1.02979
IPI00217563.4	ITGB1	Isoform Beta-1A of Integrin beta-1 beta-1	3.02577	13.3679	5.95665	8.02666	7.17013	9.90392	9.61309	9.86897	20.393	14.2106	12.6819	8.45908	12.1299	8.80608	5.73185	0.131608	0.0857399	1.70425	0.363661	1.2733
IPI00554626.3	CTBP1	C-terminal-binding protein 1 isoform 2 2	2.00708	2.03003	2.09972	2.36641	2.18495	1.37326	1.33487	1.44543	1.52859	0.61664	2.37528	2.43075	1.37411	1.47959	1.95518	0.0063877	0.00372038	0.589322	0.393604	0.899583
IPI00007052.6	FIS1	Mitochondrial fission 1 protein	1.27562	1.99543	1.2498	1.31795	1.47427	2.00806	2.72319	4.0505	4.21929	2.30489	0.937441	3.53645	1.57091	1.31722	1.85858	0.0278529	0.02158	2.09295	0.455916	1.26084
IPI01014382.2	GLUD1	Uncharacterized protein	8.1342	6.46926	7.52452	8.8938	7.84841	11.0932	6.43839	8.07409	12.4917	9.07942	12.1678	10.748	9.56987	11.7599	9.3418	0.0464382	0.205558	1.2137	0.0035508	1.37862
IPI00020332.1	ARG2	Arginase-2, mitochondrial	0.265154	0.424784	0.50285	1.36538	0.582649	0.714349	1.07572	1.31576	0.504946	1.19673	2.74309	2.51211	0.603531	0.259265	1.37793	0.193109	0.212111	1.53066	0.160666	2.38662
IPI00297579.4	CBX3	Chromobox protein homolog 3	4.51023	4.31631	4.93278	5.50217	5.41815	3.66217	4.40609	4.20032	5.22815	4.56337	1.00173	1.54007	5.05426	3.44523	1.29666	0.00954592	0.170222	0.893859	0.0306633	0.499925
IPI00216951.2	DARS	Aspartyl-tRNA synthetase, cytoplasmic	6.78947	4.86959	6.92589	5.62051	7.15276	2.98535	1.98481	3.57886	4.10733	3.5566	2.74195	6.45179	3.29688	4.90754	5.06338	0.00395723	0.000797473	0.517024	0.0609966	0.716288
IPI00215884.4	SRSF1	Isoform ASF-1 of Serine/arginine-rich splicing factor 1 splicing	11.5739	13.5667	12.6258	13.7933	12.1005	10.1225	8.56468	9.40351	10.6612	11.4169	16.4624	12.318	13.3281	11.3341	14.0481	0.00522048	0.00336443	0.788072	0.460233	1.06017
IPI01015990.1	2016-09-07	Uncharacterized protein	8.7671	8.67762	7.04647	11.5179	9.84847	11.3129	10.5898	11.0143	15.7579	13.7275	10.2959	11.1572	11.6633	13.6573	10.8213	0.0310662	0.0294767	1.36079	0.038363	1.25595
IPI00007221.2	SERPINA5	Plasma serine protease inhibitor	0.507789	4.87702	6.70065	9.40286	3.82909	0.690541	0.300576	4.48466	4.83796	0.247431	1.46327	1.49651	0.185103	0.275018	0.166455	0.0375158	0.14623	0.417151	0.0409947	0.141656
IPI00442073.5	CSRP1	Cysteine and glycine-rich protein 1	5.02422	0.19843	1.87293	4.50648	3.32487	12.2805	7.41168	11.2871	6.4019	9.56722	10.1774	11.2886	8.59621	3.90115	5.89258	0.00452739	0.00226072	3.14521	0.0185376	2.67007
IPI00399318.1	COPE	coatomer subunit epsilon isoform b b	3.02556	2.23163	4.68419	2.72357	3.11083	5.74139	7.91616	6.62123	7.52452	8.23803	2.82079	3.0872	3.59128	2.9465	4.98088	2.80112e-05	0.000178113	2.2846	0.579419	1.10465
IPI00007188.6	SLC25A5	ADP/ATP translocase 2	5.38893	2.17166	3.06737	4.08263	5.80904	0.357769	0.184795	2.10672	0.274904	0.617624	8.47257	5.617	0.51203	4.93551	7.4009	0.00930221	0.00452484	0.172606	0.434948	1.31279
IPI00980912.1	MT-ND1	NADH-ubiquinone oxidoreductase chain 1	0.152639	0.184207	0.111785	0.457391	0.303612	0.444699	1.1042	0.609543	1.19806	1.6245	0.224907	0.644655	0.420711	0.187336	0.31745	0.00430578	0.0210748	4.11778	0.291659	1.48397
IPI00552360.2	FAHD1	Isoform 1 of Fumarylacetoacetate hydrolase domain-containing protein 1 hydrolase	0.465031	0.285389	0.380008	0.259463	0.301786	0.226001	0.157454	0.398679	0.34963	0.224129	0.301954	0.975626	0.599778	0.326126	0.14073	0.329886	0.282773	0.801508	0.431809	1.38573
IPI00339238.1	DHRS7	Isoform 2 of Dehydrogenase/reductase SDR family member 7 SDR	11.7297	9.91285	16.4453	6.53144	3.05442	0.263523	10.9359	8.26377	3.00029	0.233291	0.199022	1.69713	0.455051	0.216599	1.43744	0.0175692	0.150861	0.476086	0.0178341	0.0840137
IPI01012311.2	DMBT1	Uncharacterized protein	0.351891	0.239583	0.315497	0.600901	0.406549	0.522028	0.652523	0.753563	0.44615	0.799184	0.238159	0.288251	0.653564	0.280466	0.291062	0.0239082	0.024069	1.65765	0.747745	0.9149
IPI00220278.5	MYL9	Myosin regulatory light polypeptide 9 9	0.240465	0.15867	0.111762	0.34073	0.21341	1.83948	0.323806	0.188783	0.452817	0.546313	2.88766	0.210852	0.246285	2.1667	1.28708	0.106445	0.201057	3.14656	0.0949918	6.38342
IPI00947319.1	PDHB	Uncharacterized protein	1.10627	0.881297	0.211056	0.521847	0.368108	0.251373	0.404104	0.322484	0.664804	0.385232	2.53046	1.3705	1.09255	0.522065	1.19292	0.0244404	0.286395	0.656612	0.0979194	2.17204
IPI00976528.2	MAOB	cDNA FLJ51821, highly similar to Amine oxidase (flavin-containing) B to	0.544763	0.493732	4.51648	0.346974	1.22578	8.79754	4.03145	0.205527	2.70101	4.89192	3.9964	2.76274	9.68129	10.9336	4.54349	0.063956	0.143633	2.89397	0.0358888	4.47794
IPI00788953.3	EPB41L2	band 4.1-like protein 2 isoform b isoform	3.31429	1.38645	0.27065	1.92492	1.83071	0.847626	1.11543	1.22527	1.27863	1.33765	1.58612	2.40878	1.71606	1.80338	0.702028	0.430417	0.301843	0.66513	0.861449	0.941485
IPI00220453.1	PML	Isoform PML-4 of Protein PML PML	0.147001	0.332932	0.13349	0.138168	1.06592	0.990549	0.889706	0.472767	0.614208	1.78584	0.408554	0.293412	0.180955	1.63558	1.27103	0.245285	0.0800253	2.61515	0.289519	2.08501
IPI00001960.4	CLIC4	Chloride intracellular channel protein 4 4	0.244245	0.417978	1.25006	2.0858	1.09172	0.818583	2.24202	0.293941	2.20045	3.55907	4.64475	0.771961	1.43237	6.82676	1.39079	0.229072	0.269157	1.79065	0.166105	2.96016
IPI00022145.6	NUCKS1	Isoform 1 of Nuclear ubiquitous casein and cyclin-dependent kinases substrate ubiquitous	0.167659	0.448351	0.140701	0.777438	0.349606	0.913641	0.959264	0.620069	0.630077	0.579508	0.152185	0.140175	0.369539	0.389744	0.166501	0.00470606	0.0355413	1.96552	0.340166	0.646658
IPI00456925.3	DBNL	Isoform 1 of Drebrin-like protein protein	1.89816	0.432329	0.668037	0.651528	2.35447	0.481497	0.146594	0.18554	0.218393	0.806754	0.649544	0.15432	0.636883	0.416677	0.198526	0.0544271	0.097747	0.306232	0.111072	0.342401
IPI00217030.10	RPS4X	40S ribosomal protein S4, X isoform X	38.9837	18.9208	14.0773	25.9633	24.7593	12.4891	12.5203	13.7133	12.0495	14.2679	26.5621	18.4328	18.1425	19.6084	10.2788	0.0444788	0.0509844	0.530055	0.269403	0.758119
IPI00010349.1	AGPS	Alkyldihydroxyacetonephosphate synthase, peroxisomal	0.256566	0.231294	0.290699	0.170341	0.364679	0.494006	0.658292	0.866577	0.548438	0.344363	0.630907	0.329146	0.185411	0.0959948	0.220141	0.020823	0.0180732	2.2166	0.774765	1.11269
IPI00411706.1	ESD	S-formylglutathione hydrolase	0.0818996	0.106469	0.267035	0.393654	0.167787	3.35916	0.174766	0.414602	0.395815	0.448879	1.1897	1.22578	0.211877	0.975491	2.22145	0.234784	0.278698	4.71382	0.0390468	5.72782
IPI00020557.2	LRP1	Prolow-density lipoprotein receptor-related protein 1 1	0.10686	0.349436	0.773675	0.570224	0.663101	2.95672	2.65811	1.94774	0.234474	4.40182	3.98229	2.98328	2.42553	1.60837	4.85409	0.00901702	0.0448109	4.95225	0.00828833	6.43591
IPI00219018.7	GAPDH	Glyceraldehyde	440.043	374.235	387.889	380.038	372.656	320.304	340.379	330.041	451.13	354.318	322.376	262.45	379.906	373.768	249.345	0.100892	0.280185	0.918824	0.0522262	0.812255
IPI00453473.6	HIST1H4A	Histone H4	680.429	733.676	606.599	1148.95	1067.63	701.403	604.459	754.669	961.738	693.283	931.105	837.938	736.938	679.769	825.887	0.634206	0.4328	0.87687	0.715931	0.946747
IPI00946636.2	ATP6V1A	cDNA FLJ51804, highly similar to Vacuolar ATP synthase catalytic subunit A, ubiquitous isoform to	2.06852	0.223075	1.12295	1.19599	0.900751	3.27706	2.03482	1.42998	3.32027	3.06014	3.05379	4.71972	4.06625	4.154	4.57414	0.000108714	0.0143349	2.38098	8.92851e-05	3.73196
IPI00009904.1	PDIA4	Protein disulfide-isomerase A4	37.8862	37.3879	45.3805	43.5047	42.9415	43.3993	34.2374	34.612	43.4957	34.3039	44.8116	32.3053	34.9956	35.1585	25.7643	0.17004	0.251291	0.917661	0.0961366	0.835512
IPI00954888.2	GZMA	Isoform beta of Granzyme A (Fragment) A	0.238226	0.370694	1.32758	0.360682	2.21422	2.00917	2.30106	1.24539	10.4556	10.7064	20.6848	4.71448	3.79316	25.429	1.63807	0.0998253	0.107017	5.92223	0.102292	12.4705
IPI00917144.1	PHYHD1	Phytanoyl-CoA dioxygenase domain containing 1 (Fragment) 1	1.07758	0.274162	0.666834	2.01866	2.06881	0.206928	0.165948	0.677738	0.459425	0.36747	0.353823	0.649454	0.532443	0.298665	0.88307	0.045385	0.0769912	0.307483	0.133872	0.445043
IPI00011919.1	FADD	Protein FADD	0.123125	0.341155	0.314297	0.263048	0.240215	0.249879	0.53868	0.113291	0.389961	0.452221	0.607097	0.284007	0.88835	0.284618	0.278954	0.254179	0.315883	1.36057	0.161261	1.82786
IPI00007047.1	S100A8	Protein S100-A8	3.4704	0.629728	0.326374	0.23475	0.283201	0.489642	2.25824	1.92987	0.486766	0.59066	0.291385	1.7692	1.73989	11.7493	1.88792	0.335293	0.832072	1.16397	0.306099	3.52672
IPI00410714.5	HBA1	HBA2;HBA1 Hemoglobin subunit alpha	2937.35	1205.82	2175	2056.11	1461.77	1340.45	1592.97	2062.67	2816.91	2578.11	918.668	978.21	2151.61	1136.91	626.513	0.0796575	0.794679	1.05643	0.0792934	0.590878
IPI00012750.3	RPS25	40S ribosomal protein S25	7.9784	15.5938	14.1164	12.875	14.8275	6.7796	8.87348	5.87301	8.02332	11.3223	14.2481	8.35303	9.67056	8.6524	6.91774	0.0351283	0.0200752	0.625036	0.0932185	0.731627
IPI00219953.5	CMPK1	UMP-CMP kinase isoform a	5.08377	4.29066	4.02001	5.16655	5.8284	3.82325	2.76542	2.87528	3.61551	3.37129	5.75693	9.42374	5.00996	3.10415	5.64393	0.0468243	0.0047442	0.674504	0.437961	1.18653
IPI00396399.5	TGFB1I1	Isoform 2 of Transforming growth factor beta-1-induced transcript 1 protein growth	0.157782	0.141081	0.206241	0.575425	0.250087	0.674458	0.113873	0.292843	0.210735	0.362085	0.125765	0.192603	0.477145	0.385981	0.368133	0.848916	0.617293	1.24303	0.681947	1.16459
IPI00917420.1	VDAC2	30 kDa protein	15.1842	10.405	11.2021	11.6382	10.662	2.78755	8.94635	8.00999	13.5188	6.95283	21.9873	15.9679	10.1204	11.0793	14.7036	0.0420339	0.0993699	0.680565	0.248305	1.2499
IPI00029623.1	PSMA6	Proteasome subunit alpha type-6	5.12126	5.73185	5.82557	5.27072	7.03232	4.29512	2.38485	3.62957	6.03478	2.83412	6.38639	5.67807	4.39846	4.88988	3.03206	0.0679221	0.0347589	0.661743	0.212033	0.841388
IPI00178744.5	ACADVL	Isoform 2 of Very long-chain specific acyl-CoA dehydrogenase, mitochondrial long-chain	9.30561	10.6177	14.2837	10.8085	19.6724	5.38408	3.09663	8.13589	10.1506	5.50827	6.83338	6.47329	11.3711	9.1966	18.3283	0.0713965	0.0235159	0.498942	0.40863	0.806992
IPI00976752.2	CLU	Isoform 4 of Clusterin	3.56697	3.41219	0.378247	0.263596	14.0315	22.5398	17.2988	7.67039	53.568	22.7422	10.5115	18.2143	5.27255	14.3303	3.57465	0.0345009	0.0546121	5.71846	0.142956	2.3971
IPI00021827.3	DEFA3	Neutrophil defensin 3	3.16345	0.61506	0.381882	0.329534	0.217668	0.318486	0.369411	0.644611	0.321079	5.05601	0.329215	0.209598	0.344243	0.393654	0.13077	0.502826	0.72388	1.42527	0.303985	0.298981
IPI00644409.2	GDA	Uncharacterized protein	0.448382	0.405985	0.497614	0.212259	0.918658	1.05929	1.33321	1.2812	1.15173	0.914782	1.44243	0.219516	0.370977	0.389043	0.562763	0.0199313	0.00231015	2.3119	0.698618	1.20211
IPI00216520.1	ARFIP1	Isoform A of Arfaptin-1	0.296006	0.594356	0.605584	0.801014	1.44313	0.216449	0.311672	0.311175	0.218636	0.316308	0.789549	0.300263	0.669892	0.631432	0.62842	0.0460473	0.0685141	0.367435	0.517404	0.807348
IPI01022268.1	MYL6	Uncharacterized protein	52.6551	32.87	26.0462	39.1815	50.7136	45.3868	24.3796	35.1244	50.3388	41.4845	43.6739	11.0709	35.4423	37.1425	13.0294	0.257201	0.892328	0.976412	0.187018	0.696687
IPI00759715.1	FH	Isoform Cytoplasmic of Fumarate hydratase, mitochondrial hydratase,	12.1872	7.2672	13.7571	13.7905	11.7354	10.4491	17.7691	16.2864	22.3655	18.4609	18.8331	18.5635	14.0325	9.40808	14.8862	0.10972	0.0537481	1.45275	0.148636	1.28919
IPI00009790.1	PFKP	6-phosphofructokinase type C	1.07743	0.533626	3.04576	3.608	1.73147	1.7825	0.536184	1.88296	2.97997	2.57826	2.98618	4.03089	2.02665	3.78082	1.60525	0.356095	0.949097	0.97635	0.272415	1.44352
IPI00964721.1	RNASET2	Uncharacterized protein	9.36384	24.2515	17.7975	20.1555	35.3883	0.126947	7.8833	18.6461	4.2454	4.95539	0.325088	2.66272	0.564952	0.628202	3.38159	0.00185782	0.0297103	0.335249	0.00896071	0.0707067
IPI00031107.1	HSDL2	Isoform 2 of Hydroxysteroid dehydrogenase-like protein 2 dehydrogenase-like	3.1806	2.94752	1.01614	2.87946	5.90198	0.493424	0.300451	0.486563	1.15381	0.62855	0.159807	0.196759	1.20472	2.89227	0.628332	0.0124432	0.0289487	0.192318	0.0535234	0.3191
IPI00003362.3	HSPA5	78 kDa glucose-regulated protein	244.671	235.144	216.032	225.847	258.622	191.606	196.216	189.073	272.611	252.738	272.951	207.562	225.643	205.886	158.134	0.592788	0.447213	0.933856	0.316742	0.906687
IPI01018954.1	HADHB	cDNA FLJ56214, highly similar to Trifunctional enzyme subunit beta, mitochondrial to	15.0866	12.0821	17.0997	12.7401	24.5236	8.84339	12.7586	9.64646	10.0631	9.11536	14.1272	14.9389	9.64713	9.15843	14.8779	0.0439093	0.0474192	0.618491	0.193467	0.769629
IPI00024811.1	MPZL2	Myelin protein zero-like protein 2 2	2.59512	2.93406	0.458184	0.279186	2.88586	0.390908	0.757491	0.620757	0.387804	0.447326	0.386275	0.303549	0.326284	0.338376	0.180154	0.0195038	0.0942955	0.284546	0.0639876	0.167676
IPI00640357.1	USP14	ubiquitin carboxyl-terminal hydrolase 14 isoform b isoform	2.6491	2.20167	2.07901	1.48134	1.8451	0.429551	0.262811	1.08403	0.424666	1.60614	1.57516	1.48298	1.54617	1.60014	0.884724	0.00240229	0.00430194	0.371209	0.0306235	0.691208
IPI01010147.2	SF3A1	Uncharacterized protein	1.42109	1.49133	1.37907	2.74727	2.5713	2.46229	2.82196	2.86771	3.51616	2.79452	2.19923	1.5987	2.19299	1.26348	2.4669	0.0211775	0.029919	1.50495	0.954314	1.01157
IPI00329600.3	SCCPDH	Probable saccharopine dehydrogenase	0.39524	0.215282	0.406295	0.176961	0.425343	1.82956	1.40396	0.149002	3.8214	1.36358	2.93732	2.50846	0.811071	0.819605	1.67191	0.0584034	0.0801587	5.29145	0.0293883	5.40316
IPI01012492.1	KNG1	cDNA FLJ53075, highly similar to Kininogen-1 to	2.55904	2.53274	1.51593	3.4955	2.32157	6.88425	10.7764	4.68159	12.6837	9.12358	15.5754	8.653	3.04935	3.87367	3.10911	0.046863	0.00947725	3.55334	0.145096	2.75744
IPI00220847.2	ITGB4	Isoform Beta-4D of Integrin beta-4 beta-4	0.502293	0.30317	0.142132	0.328121	0.432808	0.546844	0.428421	0.677973	1.9176	0.450844	0.220019	0.097666	0.449066	0.348324	0.135044	0.0862467	0.177768	2.35389	0.338586	0.731695
IPI00168292.3	MRPS35	Isoform 2 of 28S ribosomal protein S35, mitochondrial ribosomal	0.238275	0.12298	0.609966	0.369873	0.666696	0.190624	0.455651	0.345894	1.09278	0.445316	0.750956	0.365996	0.504071	0.17881	0.251721	0.802596	0.592391	1.26022	0.953568	1.0218
IPI00290614.8	ENDOG	Endonuclease G, mitochondrial	0.113731	0.160184	0.154674	0.0796987	0.0424969	0.518135	0.501284	0.300534	0.289553	0.558682	0.477575	0.138937	0.169846	0.603071	0.102849	0.0187885	0.00297281	3.93655	0.137231	2.70937
IPI00219625.1	ENG	Isoform Short of Endoglin	0.114332	0.17792	0.211774	0.409178	0.589924	1.01066	0.920634	0.343124	0.225829	2.08276	0.712074	0.367216	0.650987	2.39131	0.565932	0.250067	0.136448	3.04898	0.160319	3.11851
IPI00013698.3	ASAH1	N-acylsphingosine amidohydrolase (Acid ceramidase) 1 1	4.04713	1.54832	4.96089	3.18855	0.479067	3.82962	5.0933	0.630383	1.25266	8.59323	0.238226	1.09391	5.74975	0.246029	1.78485	0.454884	0.552434	1.36384	0.458411	0.640663
IPI00007364.1	CLDN3	Claudin-3	1.05183	1.20798	4.47442	5.49569	3.78371	3.99446	4.96743	3.02472	5.95293	3.12856	2.24949	11.6028	0.185463	1.50733	7.91232	0.748122	0.368984	1.31564	0.552572	1.46484
IPI00012315.2	NME3	Nucleoside diphosphate kinase 3	1.14464	0.63152	1.79365	1.8226	2.03849	1.15333	0.771426	0.955283	0.736011	0.335853	1.02697	1.05424	0.336808	0.359036	0.232967	0.0204943	0.0556249	0.531819	0.0265188	0.405068
IPI00550234.4	ARPC5	Isoform 1 of Actin-related protein 42403 complex subunit 5 protein	5.50064	4.53562	3.87474	4.72954	3.3985	3.93947	0.0965754	2.02694	0.205114	0.467358	5.56391	8.63383	4.96846	7.3401	5.31806	0.000357531	0.0102273	0.305614	0.047498	1.444
IPI00221092.8	RPS16	40S ribosomal protein S16	23.8894	11.3869	15.9524	15.3653	21.3565	10.8898	12.7834	10.9921	18.1136	11.2597	31.1077	23.466	13.3447	16.593	20.0677	0.0837733	0.113285	0.728122	0.407916	1.18907
IPI00290543.5	NPLOC4	Isoform 1 of Nuclear protein localization protein 4 homolog protein	0.156485	0.183684	0.120734	0.306806	0.301933	2.29772	0.259373	1.05848	2.03821	0.790315	0.3476	0.252946	0.14036	0.322506	0.104473	0.00763062	0.0482612	6.02453	0.758371	1.09185
IPI00218914.5	ALDH1A1	Retinal dehydrogenase 1	22.1065	18.9602	18.2219	10.9458	15.2792	18.0222	20.3083	16.9311	29.5523	19.2782	40.9502	19.1212	21.1282	22.5757	14.8223	0.351588	0.242894	1.21726	0.229426	1.38689
IPI00013219.1	ILK	Integrin-li	0.746803	0.545178	1.95437	1.07714	0.357496	1.29164	0.940826	0.812928	0.521956	1.28994	1.29693	0.631607	1.55401	2.4693	1.7554	0.204161	0.91509	1.03766	0.178999	1.6465
IPI00902799.1	FDPS	Farnesyl	1.16409	0.310314	0.947107	0.799517	0.332517	0.196595	0.196336	0.217864	0.35321	0.370463	0.225907	0.185437	0.129148	0.513487	0.132063	0.0157328	0.0571148	0.375532	0.046258	0.333763
IPI00815784.1	PPP2CA	Serine/threonine-protein phosphatase	3.03017	1.86116	4.11075	3.0872	3.17796	2.49701	1.74618	2.26875	2.89407	2.22653	5.27218	4.86925	2.61426	4.7793	2.35953	0.0528802	0.12143	0.761929	0.238559	1.30309
IPI00395887.4	TMX1	Thioredoxin-related transmembrane protein 1	0.234247	0.43413	0.355027	0.528216	0.168614	0.415177	0.46003	0.289653	0.34842	0.852576	0.741747	1.32088	0.699987	0.67031	0.575944	0.0227033	0.313076	1.37531	0.0220068	2.33042
IPI00922413.1	TJP2	tight	0.614464	0.301055	1.74026	0.435064	0.359783	0.310013	0.569947	1.21824	0.833527	0.813661	0.44944	0.569592	0.432988	0.381697	0.859042	0.713461	0.853954	1.08542	0.613849	0.780369
IPI00221091.9	RPS15A	40S ribosomal protein S15a	6.33612	7.33146	7.47773	8.58608	7.15623	4.93859	3.6447	2.96062	2.66014	2.46297	6.26494	3.36942	4.79257	6.76786	1.71095	0.00213351	0.000136302	0.451832	0.0366672	0.62096
IPI00554711.3	JUP	Junction plak	20.9097	9.85598	24.186	22.0943	42.0082	11.1603	9.46892	16.2537	9.36319	9.33856	6.50839	21.4425	13.9085	3.72102	21.8809	0.0763482	0.0691738	0.466886	0.148557	0.566644
IPI00888475.2	MAP4	Isoform 6 of Microtubule-associated protein 4 protein	6.24846	7.79419	6.85093	8.96995	8.07018	6.03938	6.06455	3.44786	3.8124	4.76838	4.48031	2.94915	5.06162	6.68348	2.34096	0.00538451	0.00528745	0.636177	0.00932942	0.567188
IPI00059292.3	MAGOHB	Protein mago nashi homolog 2 2	0.556248	0.423021	0.351769	0.65916	0.243248	0.142132	0.229919	0.105353	0.24511	0.275897	1.3229	1.62924	0.34014	0.20677	0.68302	0.0552049	0.0244268	0.447027	0.236838	1.87247
IPI00304612.9	SNORD32A	60S ribosomal protein L13a	3.71767	1.99018	1.90646	2.30729	3.25442	3.10136	0.323357	1.69197	0.179842	0.443099	4.11018	3.42357	1.4208	1.81127	3.04512	0.0641037	0.0610946	0.435611	0.842939	1.04819
IPI00006196.3	NUMA1	Isoform 2 of Nuclear mitotic apparatus protein 1 mitotic	8.46083	17.2712	13.9704	18.0409	15.2803	13.8451	5.52242	11.8302	9.25351	10.5013	8.87471	7.6518	12.4986	6.52193	14.4831	0.0956085	0.0804589	0.697753	0.0774882	0.685123
IPI00022442.2	NDUFAB1	Acyl carrier protein, mitochondrial	3.61301	2.2304	2.38816	1.22918	3.07801	0.346662	1.30677	1.78707	2.17407	0.251059	1.06673	0.356358	0.275763	0.678443	0.719018	0.00489161	0.0435017	0.4678	0.00709435	0.24694
IPI00937974.2	ALAD	Delta-aminolevulinic acid dehydratase	0.4542	0.699744	1.50692	1.43117	1.55197	0.335643	0.184399	1.32473	1.79452	0.320234	0.160684	0.377121	0.263596	0.150883	0.968283	0.141006	0.42261	0.701546	0.0305666	0.340284
IPI00017601.1	CP	Ceruloplasmin	13.4805	17.2163	18.1073	27.6978	9.72636	60.5855	44.8675	22.7359	86.0021	40.673	112.455	49.5084	11.7786	77.73	23.4043	0.0994498	0.0312571	2.95569	0.108367	3.18777
IPI00908881.3	GPI	Glucose-6-phosphate isomerase	29.7641	21.8415	34.5186	37.3128	39.1733	24.1977	21.2001	22.5148	31.5245	21.9919	39.2658	23.3524	30.2319	22.1986	17.1045	0.18237	0.05983	0.746748	0.253251	0.812699
IPI00004656.3	B2M	Beta-2-microglobulin	3.02304	4.97846	5.584	3.84664	4.38082	6.0932	9.45908	4.86993	12.4805	15.3047	20.888	4.01584	13.6867	21.0756	7.76131	0.0465377	0.051576	2.21003	0.0556687	3.09116
IPI00013933.2	DSP	Isoform DPI of Desmoplakin	15.0961	10.0728	24.1107	27.646	28.9763	14.6985	12.1915	22.7438	15.0908	12.272	4.51148	11.8729	11.1109	0.337393	11.3278	0.0161053	0.213689	0.727056	0.0190097	0.369781
IPI00294398.2	HADH	Isoform 1 of Hydroxyacyl-coenzyme A dehydrogenase, mitochondrial A	5.83365	6.78148	23.2217	7.71679	8.59501	5.45546	4.14565	2.49545	29.7043	6.98471	4.39176	0.244736	3.16411	2.35267	4.15918	0.273953	0.913802	0.935511	0.0782202	0.274455
IPI00024095.3	ANXA3	Annexin A3	2.4777	4.61906	8.22833	8.60992	14.1959	1.08998	0.429253	2.43226	2.70438	2.05352	0.170424	3.10136	2.22576	0.549199	0.932193	0.00569297	0.0407362	0.228408	0.0333223	0.183026
IPI00913838.1	EEF1E1	eukaryotic translation elongation factor 1 epsilon-1 isoform 2 1	0.710398	0.610558	0.676377	0.494109	0.323267	0.52033	0.60061	0.323223	0.283752	0.233194	1.50514	0.923318	0.954886	0.326805	0.960329	0.0244779	0.126758	0.696736	0.120438	1.65931
IPI00946286.1	COL6A3	collagen alpha-3(VI) chain isoform 4 precursor 4	0.636133	0.217125	0.464677	0.320679	0.271364	3.38792	0.220722	0.498408	2.61081	2.1498	3.47425	3.25419	0.377854	3.14618	0.223415	0.107354	0.0849561	4.64281	0.0798767	5.48482
IPI00384489.2	AP1B1	AP-1 complex subunit beta-1 isoform c isoform	4.88717	4.81488	2.76792	4.63478	7.23604	0.336738	2.58506	0.263779	0.423901	0.348783	0.228315	3.94548	0.147839	5.20645	0.462428	0.00927328	0.00203915	0.162619	0.0611328	0.410443
IPI00166729.4	AZGP1	Zinc-alpha-2-glycoprotein	1.6481	7.04695	0.19271	0.759331	0.214924	26.3695	11.7729	7.05673	17.0453	6.19326	4.24716	0.985549	0.37072	0.197456	1.09308	0.00405662	0.0311795	6.93953	0.703582	0.699043
IPI00005614.6	SPTBN1	Isoform Long of Spectrin beta chain, brain 1 beta	9.11157	12.3917	15.2581	16.7571	19.321	29.6138	15.8785	15.6642	20.6318	22.7816	24.672	22.8623	29.5339	23.4888	19.411	0.0193134	0.0808378	1.43562	0.00451227	1.64702
IPI00917623.1	TSN	Uncharacterized protein	7.13048	3.75861	3.88173	3.66522	3.46823	4.58906	7.87948	4.34784	12.1729	6.53868	0.484208	5.78333	0.606425	2.60395	2.48578	0.0277253	0.137705	1.62196	0.134744	0.546181
IPI00003865.1	HSPA8	HSPA8 Isoform 1 of Heat shock cognate 71 kDa protein	259.502	234.672	214.956	297.429	237.519	227.891	195.578	212.247	240.401	240.268	336.019	219.215	238.559	205.287	170.131	0.635672	0.167827	0.89736	0.648809	0.939821
IPI00056357.3	C19orf10	UPF0556 protein C19orf10	0.438121	0.354044	1.1959	1.25571	1.53656	2.08031	0.793444	0.359011	0.568803	1.06245	0.51961	1.60225	0.286122	1.32225	0.227368	0.876246	0.966201	1.01751	0.666594	0.827894
IPI00004573.2	PIGR	Polymeric immunoglobulin receptor	0.112127	0.376547	0.380139	0.339057	2.93956	4.92731	6.89237	0.270106	20.649	5.00372	0.186753	7.43329	10.9868	21.1473	2.13288	0.181517	0.123527	9.10022	0.112257	10.0995
IPI00844090.1	COL5A1	Collagen alpha-1(V) chain	0.137576	0.13861	0.358017	0.0648387	0.219167	0.389285	0.518386	0.422083	1.0319	0.450095	1.31503	1.78955	0.22158	0.256068	1.85318	0.0402576	0.0300884	3.06221	0.0647902	5.91959
IPI00414963.2	PABPN1	Isoform 2 of Polyadenylate-binding protein 2 protein	1.2498	0.700327	0.984184	0.821482	0.23067	0.176092	0.290861	0.224113	0.290901	0.269994	0.553939	0.378798	0.402483	0.811296	0.225938	0.0169296	0.0310543	0.314053	0.146782	0.595127
IPI00019927.2	PSMD7	26S proteasome non-ATPase regulatory subunit 7 subunit	0.18399	0.615146	0.377828	0.419168	0.357645	0.343409	0.420536	0.297425	0.87436	0.192349	0.399039	0.344458	1.24186	0.435788	0.736369	0.36755	0.806766	1.08921	0.237053	1.61611
IPI00021440.1	ACTG1	Actin, cytoplasmic 2	1710.14	1400.47	1713.58	1570.93	1688.35	1367.48	1460.86	1367.57	1991.17	1727.42	2303.8	1464.81	1361.52	1715.96	1305.6	0.966054	0.811599	0.979095	0.946215	1.00844
IPI00418471.6	VIM	Vimentin	800.524	709.422	778.579	731.29	700.334	993.103	789.229	758.024	833.247	1008.78	1284.51	923.776	882.651	1102.45	716.638	0.0682488	0.0626739	1.17801	0.0699259	1.31985
IPI00554811.2	ARPC4	ARPC4-TTLL3 Actin-related protein 42403 complex subunit 4	15.7622	10.047	7.09843	9.28692	11.6657	8.18283	7.61899	11.1626	13.9791	8.18453	18.4609	16.5424	9.77096	14.4922	11.0863	0.132877	0.629925	0.912138	0.168896	1.30621
IPI00013808.1	ACTN4	Alpha-actinin-4	121.196	103.976	133.797	182.481	136.637	121.87	101.674	110.118	130.373	164.86	165.261	131.234	151.408	148.89	106.862	0.652113	0.579815	0.927455	0.764718	1.03771
IPI00550020.3	PTMS	Parathymosin	8.34204	7.00993	2.72848	0.865557	2.5338	16.8643	8.40938	9.35216	4.83863	8.29821	0.485115	0.286737	9.97903	10.4208	0.146128	0.138315	0.0672099	2.22361	0.991171	0.99246
IPI00024129.1	PPIC	Peptidyl-prolyl cis-trans isomerase C	2.15591	1.32961	0.770892	1.32998	1.49672	0.235386	0.303086	0.532148	0.299017	1.39397	2.04784	1.29702	0.303738	0.984593	1.87306	0.068314	0.0236521	0.390169	0.772918	0.918559
IPI00798400.1	EIF4G1	Isoform D of Eukaryotic translation initiation factor 4 gamma 1 translation	4.49961	3.32833	2.78891	2.46092	3.42808	1.53145	2.06938	1.69678	2.3361	2.82138	2.50759	1.28494	1.61877	0.553019	1.55768	0.00374467	0.0232109	0.633417	0.00510109	0.455717
IPI00791032.2	MYLK	Isoform 5 of Myosin light chain kinase, smooth muscle light	0.324075	0.130915	0.202993	0.602946	0.298189	0.429372	0.285408	0.38767	0.311132	0.551564	0.923254	0.154953	0.485788	0.741439	0.173523	0.47198	0.415651	1.26042	0.325883	1.58997
IPI00908803.1	PMPCA	cDNA FLJ59584, highly similar to Mitochondrial-processing peptidase alpha subunit, mitochondrial to	0.249983	0.207675	0.270706	0.253877	0.256015	0.532222	1.59085	0.36216	0.989794	0.283653	0.281948	0.186533	0.03697	0.243991	0.169235	0.0298626	0.106548	3.03546	0.204975	0.741912
IPI00549725.6	PGAM1	Phosphoglycerate mutase 1	39.4403	43.862	44.7526	60.5855	50.4471	53.1317	51.2649	46.7696	54.971	58.4812	33.8692	20.9097	44.3327	47.3437	20.2226	0.0135313	0.26156	1.10678	0.0698418	0.697142
IPI00554761.2	HMGN1P38	HMGN1 Non-histone chromosomal protein	0.144998	0.248807	0.133564	0.277719	1.1321	1.65359	2.53889	2.59692	1.30885	1.02541	5.80703	0.261195	3.78266	1.35435	3.5883	0.0334039	0.00706468	4.70975	0.0566854	7.6366
IPI00478565.2	PTK7	Isoform 4 of Inactive tyrosine-protein kinase 7 tyrosine-protein	0.278143	0.254952	0.197839	0.327349	0.556672	0.343838	1.83503	0.602987	0.329671	0.278471	0.133212	1.42208	0.318044	0.193044	1.41059	0.496112	0.298855	2.09912	0.280336	2.15298
IPI00024284.6	HSPG2	Basement membrane-specific heparan sulfate proteoglycan core proteoglycan	8.92344	3.71484	2.96699	3.94274	1.49081	3.51933	4.5193	4.95539	7.5167	5.8381	3.28729	17.3132	2.88246	6.5251	20.1848	0.192843	0.483459	1.25239	0.191073	2.38573
IPI00007402.3	IPO7	Importin-7	1.02151	1.03886	1.75637	0.364755	0.17771	0.798575	1.19939	0.964999	1.80851	0.738055	0.0841321	0.132063	0.643807	0.159884	0.357571	0.0390005	0.521019	1.26388	0.101685	0.315988
IPI00045498.4	HNRPDL	Isoform 3 of Heterogeneous nuclear ribonucleoprotein D-like nuclear	9.47483	9.37358	7.90574	11.2691	6.28364	5.02561	7.95686	4.55294	3.7025	5.34911	8.29993	7.26972	5.89626	6.95138	4.15515	0.0180722	0.0126458	0.600066	0.0650418	0.735155
IPI00020632.4	ASS1	Argininosuccinate synthase	0.156942	0.272835	0.27745	0.485385	0.11775	0.338001	0.316527	0.144106	0.748669	0.379139	0.285151	0.162004	0.158362	0.696116	0.281518	0.628987	0.332567	1.47016	0.657459	1.20818
IPI00004845.4	NIPSNAP3A	Protein NipSnap homolog 3A	0.751893	0.728247	1.57069	0.63728	0.727995	0.556441	0.182593	0.577703	1.24651	0.658201	0.492741	0.901813	0.700812	0.358265	0.778247	0.463301	0.355371	0.729478	0.276326	0.731839
IPI00976213.2	PON2	serum paraoxonase/arylesterase 2 isoform 2 2	0.626723	0.1206	0.174863	0.235419	1.53677	0.226205	0.111615	0.32421	1.61945	0.121886	0.525586	1.47795	0.112461	0.810677	0.771426	0.765098	0.885308	0.891992	0.578148	1.37253
IPI00927188.1	SLC4A7	Uncharacterized protein	0.285765	2.2236	0.809723	1.64673	0.244889	0.26475	0.40652	0.139429	0.649319	0.301285	0.154492	0.260003	0.191418	0.484813	0.172755	0.0668034	0.151791	0.338016	0.112017	0.242478
IPI00032038.4	CPT1A	Isoform 1 of Carnitine O-palmitoyltransferase 1, l O-palmitoyltransferase	2.19558	0.234523	2.59764	3.67132	4.94956	0.146889	0.642247	3.19187	0.390366	0.582771	1.16256	3.17356	1.13375	0.277565	1.69478	0.167591	0.112695	0.362977	0.221599	0.545272
IPI01014928.1	MAP1S	cDNA FLJ55328, highly similar to Homo sapiens BPY2 interacting protein 1 (BPY2IP1), mRNA to	0.482065	0.0848936	0.246285	0.326827	0.346013	0.173776	0.195915	0.121464	0.399786	0.277373	0.349073	0.586905	0.58273	0.377906	0.504281	0.021368	0.458714	0.786169	0.058926	1.61559
IPI00295098.3	SRPRB	Signal recognition particle receptor subunit beta subunit	0.872786	0.774802	0.66725	0.415408	1.14203	1.26173	1.1221	1.2963	1.37307	1.3506	2.25636	2.23101	1.36623	0.949935	0.900813	0.0382662	0.0102503	1.65375	0.0602427	1.98962
IPI01012468.1	OXCT1	OXCT protein	0.212539	0.231679	4.49587	3.26459	0.302519	0.51306	0.484712	0.228569	0.227604	0.402065	3.21139	3.30031	3.09556	0.320723	1.84089	0.112475	0.218115	0.21817	0.564261	1.3834
IPI00295386.7	CBR1	Carbonyl reductase [NADPH] 1	11.4415	11.3247	20.3732	13.9539	21.3935	11.2239	11.7387	7.90355	10.6155	9.20042	10.0005	11.5131	10.6383	10.8055	5.94468	0.0220719	0.0609354	0.64574	0.0509655	0.623062
IPI00909094.1	STX7	cDNA FLJ53760, highly similar to Syntaxin-7 to	0.898942	0.917831	1.55326	0.346854	1.1108	0.0991667	0.208266	0.427975	0.307338	0.515341	1.17577	0.297859	0.440252	2.07211	0.893414	0.0856996	0.0246369	0.32274	0.978572	1.01071
IPI00006865.4	SEC22B	Vesicle-trafficking protein SEC22b	11.1016	6.72437	10.1246	7.81204	6.48587	3.76905	5.34393	7.67039	5.52893	6.04776	4.54443	6.14367	5.72034	5.60533	4.25837	0.0118817	0.0416127	0.671266	0.0222029	0.621847
IPI00218342.11	MTHFD1	C-1-tetrahydrofolate synthase, cytoplasmic	2.15965	2.58991	2.87986	3.65558	5.37327	1.23439	2.05623	0.147195	1.20966	0.671472	0.851336	1.23132	1.69749	1.53613	1.54178	0.00256071	0.0119368	0.319298	0.0234144	0.41169
IPI00924895.1	SNRPG	Uncharacterized protein	2.09275	1.30026	1.12537	1.53198	0.782737	0.112407	0.275706	0.235141	0.421323	0.199464	3.46271	0.207186	0.171087	1.45407	1.1332	0.0977275	0.00582447	0.182061	0.903992	0.940752
IPI00910196.2	GULP1	cDNA FLJ57758, highly similar to Homo sapiens GULP, engulfment adaptor PTB domain containing 1 (GULP1), mRNA to	1.15549	0.268055	1.16191	4.36173	0.253525	28.3014	4.98019	8.01443	7.4235	11.3129	0.201842	7.22051	16.4066	1.45458	0.245246	0.0821183	0.06458	8.33702	0.309413	3.54531
IPI00218775.2	FKBP5	51 kDa FK506-binding protein	0.308256	0.15188	2.92655	1.26077	0.187141	2.0494	3.04428	9.26185	1.48648	2.11242	4.66863	0.119047	1.61844	0.463905	1.33348	0.198522	0.147139	3.71374	0.507491	1.69684
IPI00220834.8	XRCC5	X-ray repair cross-complementing protein 5 5	43.6346	37.797	45.674	40.3361	46.734	41.3381	26.3622	26.4831	31.125	33.6282	34.6048	17.6268	39.4759	30.8052	26.708	0.0149267	0.0122047	0.742085	0.0208945	0.696721
IPI00299063.2	STIM1	Stromal interaction molecule 1	1.51719	1.45407	2.98204	1.70409	1.53294	0.54055	2.42923	2.3633	2.43277	2.1898	6.2819	1.08043	1.84369	1.74775	0.915924	0.829552	0.751325	1.08327	0.628121	1.29154
IPI00025874.2	RPN1	Dolichyl-diphosphooligosaccharide--protein glycosyltransferase subunit 1 precu precu	42.6449	25.636	34.1378	37.6245	37.6271	31.0926	33.2297	31.5638	39.8691	33.156	53.2091	40.7407	32.14	33.2527	33.8386	0.517159	0.606667	0.950701	0.542014	1.0873
IPI00292858.4	TYMP	Thymidine phosphorylase	3.42214	0.133786	2.68161	1.66809	0.248342	9.32498	6.47329	3.60126	0.747787	7.22852	8.30857	3.51445	15.4947	18.4264	4.34062	0.0334538	0.0606991	3.35736	0.0467487	6.14236
IPI01025367.1	ALDH6A1	56 kDa protein	20.1415	28.4154	36.421	33.4168	34.2065	9.74188	20.8663	20.5377	16.2966	17.4687	2.68143	19.8037	19.7448	8.34898	24.9281	0.0088311	0.00625563	0.556425	0.017832	0.494799
IPI00337335.8	MYH14	Isoform 1 of Myosin-14	1.55757	1.23859	3.81504	3.23328	7.6116	0.384778	0.662687	2.12889	2.47444	0.375764	1.72608	2.13924	1.99432	0.389636	0.0808001	0.0868812	0.118712	0.345241	0.125847	0.362629
IPI00021841.1	APOA1	Apoli	312.714	275.422	180.368	280.197	146.129	619.947	601.616	319.55	868.029	380.302	919.496	387.862	249.449	305.409	181.786	0.105408	0.0277484	2.33459	0.272867	1.71071
IPI00555902.1	OCIAD2	Isoform 1 of OCIA domain-containing protein 2 domain-containing	1.14584	0.505436	0.992336	1.26435	0.433739	0.282496	0.55038	1.22171	0.93045	0.323761	0.320323	0.492877	0.541412	0.627419	0.180029	0.16467	0.428399	0.762097	0.0605619	0.497975
IPI00295542.5	NUCB1	Nucleobindin	10.2425	12.7048	6.79183	4.13819	9.39765	1.43863	5.25394	4.19945	4.13045	2.58202	1.5987	5.31437	1.29101	5.67964	2.35332	0.00629971	0.0211722	0.406805	0.0180494	0.375206
IPI00219078.5	ATP2A2	Isoform 1 of Sarcoplasmic/endoplasmic reticulum calcium ATPase 2 reticulum	26.2474	14.7547	12.9636	16.8153	21.8779	9.17304	16.8655	14.5667	22.6196	19.161	16.6956	16.2537	7.70449	12.5307	12.5882	0.239329	0.553824	0.88913	0.109197	0.709839
IPI00456747.1	ATP5F1	Uncharacterized protein	2.64158	3.60575	4.01305	7.64279	4.05499	5.28499	5.31327	5.5163	6.11435	5.11063	7.2516	6.76036	6.65528	7.29749	6.3177	0.0173031	0.278512	1.24507	0.0427514	1.56126
IPI00017704.3	COTL1	Coactosin-like protein	0.238556	0.182239	1.59903	0.205926	0.27327	2.55833	2.611	0.692075	4.22749	0.22906	4.98191	0.309326	5.11913	5.75294	0.278587	0.102082	0.0979185	4.12879	0.0851254	6.57933
IPI00005969.3	CAPZA1	F-actin-capping protein subunit alpha-1	13.1137	8.41288	11.1758	13.9423	15.0971	14.597	12.987	13.2305	17.795	19.0365	22.1172	18.4021	13.8575	17.1258	11.0586	0.154533	0.097811	1.2576	0.106559	1.3372
IPI00017342.1	RHOG	Rho-related GTP-binding protein	0.209671	0.278838	0.232709	0.343671	0.443068	0.231792	0.255944	0.721414	0.757648	0.381909	1.51079	0.710054	0.317626	0.72432	0.501458	0.101672	0.221668	1.55754	0.0904781	2.49625
IPI00219219.3	LGALS1	Galectin-1	77.6277	56.5792	38.7628	72.0886	99.2779	67.4385	130.328	89.109	169.472	150.081	249.899	196.216	40.6279	185.041	122.42	0.0630813	0.0496632	1.76115	0.0643357	2.30648
IPI00216049.1	HNRNPK	Isoform 1 of Heterogeneous nuclear ribonucleoprotei nuclear	85.8711	94.9305	73.1761	99.6916	92.7066	65.8221	57.3571	71.4915	87.0215	64.3782	79.6057	51.7074	72.8168	66.4179	84.4953	0.0311113	0.0183751	0.775289	0.0387698	0.795391
IPI00305383.1	UQCRC2	Cytochrome b-c1 complex subunit 2, mitochondrial 2,	8.44911	5.64197	9.07564	11.2418	10.4686	11.2122	9.68062	9.85257	16.5149	13.8758	11.9588	16.7513	10.8401	13.1811	13.379	0.0448207	0.0839231	1.3623	0.0155925	1.47314
IPI00847192.1	RPS9	RPS9 protein (Fragment)	7.99945	13.1437	8.41172	7.90738	10.926	5.79818	6.62812	5.79456	8.95628	6.30108	10.7936	10.7086	5.8665	7.91725	8.38436	0.0829252	0.0431311	0.691866	0.514654	0.902497
IPI00978452.1	KIF13B	Uncharacterized protein	0.478835	0.724421	0.43955	0.52015	0.589188	0.33351	0.498581	0.683352	0.223648	0.61077	0.242591	0.195915	0.473127	0.236236	0.573116	0.165104	0.444804	0.853829	0.0565151	0.625325
IPI00007166.3	IER3IP1	Immediate early response 3-interacting protein 1 protein	0.188247	0.170826	0.0988716	1.69913	0.487137	1.05563	1.23174	0.3888	3.22455	1.83936	1.44724	3.1212	1.58282	1.25067	1.57669	0.0807192	0.115938	2.92717	0.0231902	3.39557
IPI00010471.6	LCP1	Plastin-2	10.497	8.39017	15.9281	6.6807	18.9431	19.7352	19.9387	14.9099	30.0002	34.3562	81.6567	24.648	27.256	40.8001	9.19978	0.109065	0.0301344	1.96794	0.11596	3.03712
IPI01021966.1	CNPY2	Uncharacterized protein	1.88296	1.98866	3.12683	4.47008	3.5247	0.37514	3.82352	1	0.474178	1.09179	0.386704	1.10451	0.35456	1.23132	0.941674	0.0169826	0.0755538	0.451179	0.00788328	0.268038
IPI00300050.3	HSD11B2	Corticosteroid 11-beta-dehydrogenase isozyme 2	13.3605	14.9752	6.14494	7.99335	4.20761	0.140632	5.7251	17.5622	0.163425	0.930256	0.175118	3.47762	0.316812	0.320856	1.4023	0.0770687	0.297633	0.525295	0.0143589	0.121948
IPI00966967.1	SEC24D	Uncharacterized protein	0.709168	0.950527	0.254829	0.410712	0.358986	0.184322	0.385847	2.05338	0.190096	0.392673	0.166316	0.855832	2.4801	0.842121	0.431939	0.638346	0.793508	1.1945	0.369382	1.7794
IPI00797249.1	DCXR	L-xylulose reductase isoform 2	0.761228	0.282652	0.378142	2.45258	1.64217	0.430027	0.2705	0.315957	0.30879	0.202248	0.371929	0.604326	0.385312	0.283752	0.189491	0.0706688	0.126195	0.276887	0.150388	0.332588
IPI00219757.13	GSTP1	Glutathione S-transferase P	91.4239	112.377	101.378	128.658	118.103	153.895	123.186	111.122	134.122	126.378	161.076	141.073	101.357	139.759	83.4245	0.381497	0.0787386	1.17531	0.379147	1.13543
IPI00218188.1	STAT1	Isoform Beta of Signal transducer and activator of transcription 1-alpha/beta transducer	0.399564	0.170483	0.238473	0.515591	0.409462	0.206584	0.629509	0.21803	0.424725	0.168614	2.88646	0.469794	2.5856	1.33154	0.42682	0.023726	0.876934	0.950327	0.0816104	4.44182
IPI00221224.6	ANPEP	Aminopeptidase N	0.220951	0.226927	0.493151	0.279845	0.256139	1.8551	0.421323	0.825305	0.838103	1.30803	1.28574	1.86995	0.640114	1.55574	0.26163	0.0416714	0.0356813	3.55303	0.0478021	3.80036
IPI00005087.1	TMOD3	Tropomodulin-3	0.163822	2.46759	2.04019	0.680799	1.36623	1.57363	1.6969	1.49703	2.70607	1.3877	0.683778	0.546237	0.146696	0.112734	0.319038	0.0133765	0.410072	1.31892	0.0800502	0.269175
IPI00004358.4	PYGB	Glycogen phosphorylase, brain form	3.74976	5.56661	7.00119	4.60819	3.69507	8.50729	5.45092	6.11605	8.21579	6.9789	8.4579	5.64432	8.3513	13.6658	6.03812	0.0687868	0.0376252	1.43248	0.0698657	1.71227
IPI00383539.5	CS	Citrate synthase	12.244	14.4	14.7291	16.2256	23.5883	12.6881	12.0562	18.3601	31.1552	16.3952	13.8748	14.416	10.6472	10.2824	12.9789	0.255563	0.649306	1.11662	0.128238	0.766124
IPI00385896.1	SPP1	Isoform D of Osteopontin	0.131078	0.10233	0.152259	0.331229	0.359758	1.43415	1.71523	0.340352	8.50258	0.296787	0.443806	0.175312	0.329055	0.304793	0.924343	0.188695	0.218568	11.4142	0.173484	2.02229
IPI00005161.3	ARPC2	Actin-related protein 42403 complex subunit 2 subunit	5.6065	3.12098	6.20917	8.88517	9.28177	3.22433	3.16938	4.39176	4.15572	4.65635	9.35281	3.63889	7.28889	6.44509	5.76412	0.0820922	0.0743603	0.592007	0.935518	0.981459
IPI00909766.1	PSMD5	cDNA FLJ52877, highly similar to 26S proteasome non-ATPase regulatory subunit 5 to	1.48875	0.412882	0.685486	0.686675	1.93053	1.01347	0.813605	0.840314	1.37755	0.430415	0.553019	0.64649	0.251233	0.607982	0.473619	0.168566	0.669001	0.859928	0.136252	0.486584
IPI00967162.1	LAMTOR3	13 kDa protein	0.879344	0.519718	0.552329	0.289915	1.48103	0.637236	0.0921738	0.27065	0.319658	0.170129	1.97247	1.85099	0.502119	1.36197	0.431102	0.0444696	0.100339	0.400245	0.255436	1.64377
IPI00879573.1	SERPIND1	Heparin cofactor 2	1.0946	0.700327	1.0191	0.209802	0.207316	1.46388	1.09825	0.655515	1.35773	0.9705	4.58017	1.61956	0.488524	0.391721	0.254229	0.51419	0.0910919	1.71638	0.377503	2.26985
IPI00220362.5	HSPE1	10 kDa heat shock protein, mitochondrial protein,	26.2674	19.5514	19.9927	20.2142	21.0347	16.0667	25.8215	17.2091	35.1317	39.0649	12.0947	22.4758	11.7607	12.49	10.4737	0.0350739	0.327538	1.24503	0.0221046	0.64725
IPI00473006.1	HLA	HLA class I histocompatibility antigen	0.114824	1.94329	1.77104	2.52083	2.29867	3.43188	7.03329	6.28799	4.10477	11.529	10.9822	4.02782	6.10123	18.3474	2.5149	0.0685259	0.0265254	3.74474	0.080361	4.85318
IPI00741317.2	CSNK2A1	Uncharacterized protein	0.120024	0.400896	0.693131	0.702904	0.402595	0.218302	1.67388	1.21959	0.358638	0.250486	2.28659	1.0527	2.23024	0.358613	3.26549	0.0368204	0.415094	1.60415	0.0528509	3.96355
IPI00020599.1	CALR	Calreticulin	56.8978	46.8995	61.2059	67.6398	69.224	75.2698	86.7685	83.038	88.3281	78.5969	77.8594	63.9291	81.4306	84.6595	49.0642	0.0199532	0.00268434	1.36484	0.200099	1.18245
IPI00219097.4	HMGB2	High mobility group protein 2	3.9589	4.7803	4.45307	7.01917	7.5979	3.69788	3.57093	3.53522	3.50448	3.78292	1.49392	3.38722	3.88927	3.76644	2.55354	0.00880896	0.0562026	0.650553	0.022193	0.542637
IPI00215918.3	ARF4	ADP-ribosylation factor 4	21.3387	16.0979	22.5976	15.687	15.6176	13.1985	14.3184	13.9927	15.0115	11.7159	17.4215	18.1387	12.5316	17.0808	13.1464	0.0464025	0.0356533	0.747076	0.215061	0.857456
IPI00028931.2	DSG2	Desmoglein-2	2.19558	3.07141	5.38221	4.32021	10.7131	1.96769	1.90409	7.56479	0.265429	0.365438	1.58348	3.05125	2.41429	0.681176	3.0107	0.186293	0.21229	0.46987	0.117382	0.418219
IPI00908757.1	Cdna FLJ51345	highly similar to Histamine N-methyltransferase	0.240615	0.264584	0.445316	0.579829	0.534699	0.256264	0.582205	0.222812	0.414775	0.944747	0.309755	0.189649	0.236465	1.16256	0.154171	0.914332	0.649112	1.17228	0.990638	0.993972
IPI00607861.2	H6PD	GDH/6PGL endoplasmic bifunctional protein	0.224969	0.201521	0.333556	0.187284	0.234799	1.4061	0.155168	0.39609	0.294288	0.152439	1.42267	0.880564	0.682878	0.378509	0.797801	0.0790618	0.359811	2.03369	0.0240412	3.52112
IPI00642238.4	HP1BP3	Isoform 1 of Heterochromatin protein 1-binding protein 3 protein	8.14943	6.69739	6.94946	10.0547	10.0345	11.4764	6.21606	9.30238	9.31077	10.0624	6.75708	11.9721	9.59778	9.65717	9.42178	0.601728	0.449056	1.10702	0.344905	1.1318
IPI00014808.1	PAFAH1B3	Platelet-activating factor acetylhydrolase IB subunit gamma subunit	0.562062	1.05651	0.3476	0.308748	0.322417	0.358166	0.301598	0.258709	0.301724	0.482366	1.34789	0.303991	0.495137	0.23844	0.602737	0.450329	0.282727	0.655504	0.75782	1.15049
IPI00182757.10	KIAA1967	Isoform 1 of Protein KIAA1967 KIAA1967	2.09725	5.53046	4.10164	3.31866	2.24093	3.5806	1.1883	0.182517	0.908526	1.23722	2.03059	1.98963	3.2065	3.07077	2.88146	0.0480376	0.044528	0.410503	0.281739	0.762276
IPI00026087.1	BANF	Barrier-to-autointegration factor	4.53625	6.83149	4.3268	6.8833	0.437211	7.99058	15.0219	15.514	17.8308	16.9228	4.17825	11.7819	9.14004	3.78948	6.20874	0.0012472	0.00197453	3.18401	0.246445	1.52502
IPI00017184.2	EHD1	EH domain-containing protein 1	0.526681	0.281128	0.405676	0.810621	0.45219	0.119825	0.605123	0.175848	0.470837	0.457994	2.99738	1.01038	1.72035	0.989108	0.100956	0.0617792	0.343259	0.738856	0.146858	2.75337
IPI01025397.1	GSTZ1	21 kDa protein	0.192977	0.239816	0.444699	1.49973	1.18509	0.191087	0.204802	0.313362	0.272703	0.235745	0.530417	0.621704	1.08343	0.231663	0.836826	0.157221	0.152034	0.341828	0.869543	0.927498
IPI00977736.1	CACYBP	calcyclin-binding protein isoform 2	2.5102	4.85039	3.06078	3.1303	2.23179	1.2447	2.41647	2.14622	1.05555	1.56461	2.42016	0.174682	2.90372	0.228997	1.2234	0.0331182	0.0291468	0.533949	0.040777	0.440395
IPI00025861.3	CDH1	Cadherin-1	3.55784	3.58159	9.09012	7.3401	9.83551	3.20517	2.71095	4.67252	6.69368	4.60819	3.93128	6.41434	9.49258	2.85938	3.79658	0.36802	0.176268	0.655303	0.463704	0.793115
IPI00291006.2	MDH2	Malate dehydrogenase, mitochondrial	102.993	58.1175	60.2504	97.7348	97.6874	50.4471	79.512	76.559	118.891	85.9663	94.8845	78.2978	75.2542	82.5617	75.1187	0.985433	0.943534	0.987027	0.848031	0.974409
IPI00644245.1	CHTOP	Isoform 3 of Chromatin target of PRMT1 protein target	0.599279	0.133277	0.544574	0.233242	0.373531	0.479167	0.337439	0.359883	1.12576	0.404469	0.320123	0.153307	0.398237	0.177538	0.162769	0.167	0.374393	1.43676	0.232124	0.643332
IPI00927101.1	SNORA6	Uncharacterized protein	37.7577	24.4269	25.5225	33.6119	44.852	25.1747	28.1215	20.7408	29.793	36.3353	59.3469	41.5334	32.0599	33.9561	25.6378	0.262238	0.296801	0.843499	0.47261	1.15865
IPI00219065.2	AGL	Isoform 5 of Glycogen debranching enzyme debranching	0.0917912	0.105141	0.155049	0.262739	0.145471	0.246507	0.449471	0.417081	0.247689	0.268427	0.28326	0.194953	0.288571	0.410769	0.340187	0.0123051	0.0140748	2.14311	0.0120908	1.99653
IPI00217469.3	HIST1H1A	Histone H1.1	0.247311	1.33173	1.21799	0.743858	3.84584	0.137385	0.35172	1.49557	3.12466	0.908652	3.26504	2.42637	1.80413	0.825763	2.89086	0.392221	0.747512	0.814703	0.34507	1.51788
IPI00296337.2	PRKDC	Isoform 1 of DNA-dependent protein kinase catalytic subunit protein	27.4265	29.393	29.1697	26.2328	31.3719	18.8776	18.854	21.1751	21.3047	23.1125	25.7571	24.0006	19.8587	25.895	27.0865	0.000406692	0.000153614	0.719556	0.0290482	0.853782
IPI00032139.1	SERPINB9	Serpin B9	22.9528	1.51058	40.6956	24.544	78.4989	0.335434	7.02793	18.0109	5.30664	7.36763	0.254811	33.9773	5.2354	0.204121	6.71739	0.0881425	0.112345	0.226208	0.14071	0.275794
IPI00005160.3	ARPC1B	ARPC1A Actin-related protein 42403 complex subunit 1B	0.413368	1.45015	1.33469	2.09029	1.62484	2.262	2.68962	2.36608	1.96946	2.44494	2.43936	2.07613	3.26979	3.99031	1.97137	0.0139287	0.0207117	1.69703	0.0224911	1.98847
IPI00374151.1	PRDX3	thioredoxin-dependent peroxide reductase, mitochondrial isoform b isoform	9.78926	13.5667	15.3365	13.6943	21.8052	11.248	14.423	12.2033	17.9324	19.7079	28.102	18.383	16.7594	17.4131	27.094	0.0670203	0.920046	1.01783	0.0689341	1.45233
IPI00029631.1	ERH	Enhancer of rudimentary homolog	7.37478	3.77062	6.03018	14.1713	13.2351	2.75891	2.51072	2.9144	5.36806	2.78234	3.81452	3.32464	5.6887	11.4074	8.77136	0.0613754	0.0485891	0.366391	0.393394	0.740358
IPI00941747.1	CANX	Calnexin	65.015	66.4732	83.1359	77.252	63.5315	60.3131	61.461	63.1627	58.1578	66.6161	60.1711	40.5885	57.5961	61.1042	39.6294	0.00994871	0.0764168	0.871424	0.015076	0.728993
IPI00894460.1	RPA3	Uncharacterized protein	0.999376	2.04174	1.81983	0.846159	1.20715	1.01045	0.143757	0.790151	0.308427	0.565422	0.152872	0.191538	0.915797	0.406887	0.341226	0.00506056	0.0226157	0.407594	0.00971959	0.290461
IPI00006252.3	AIMP1	Aminoacyl tRNA synthase complex-interacting multifunctional protein 1 multifunctional	0.196377	0.142112	0.761544	1.57604	0.293575	0.95621	1.3435	1.04943	3.10932	1.33932	1.69232	1.66983	0.489676	0.893785	0.148342	0.155166	0.0827319	2.62583	0.376288	1.64799
IPI00646262.1	NSDHL	Uncharacterized protein	0.397658	0.829665	3.14792	1.06881	3.38487	0.795647	0.365059	0.853463	0.386141	0.409575	0.384352	0.549961	0.39164	0.393354	2.49441	0.167328	0.125664	0.318259	0.257352	0.477263
IPI00010896.3	CLIC1	Chloride channel ABP	22.9147	11.8869	29.3401	29.8633	33.2504	37.5802	32.5752	28.1449	51.4607	50.9885	30.6603	35.7012	44.1793	48.7456	30.5585	0.0544144	0.0435316	1.57753	0.044688	1.49184
IPI00218889.3	DNM2	Isoform 2 of Dynamin-2	2.00042	3.51129	1.9545	2.15382	2.13465	0.618052	0.884724	1.74799	0.696164	1.57124	1.61519	2.37002	2.38915	1.03469	0.61255	0.0357243	0.0110457	0.469445	0.144188	0.682418
IPI00304596.3	NONO	Non-POU domain-containing octamer-binding protein	16.3034	22.4415	15.0887	26.3239	17.9785	15.5895	16.6171	18.6357	15.9878	13.1419	21.2222	17.9723	14.5657	18.3613	13.8489	0.266813	0.165709	0.81491	0.360719	0.876032
IPI00783919.4	SUMF2	Uncharacterized protein	2.23426	0.564287	2.33772	1.44373	0.979828	0.164756	1.90832	2.09319	1.29756	1.49185	0.540475	0.592793	1.11018	1.12397	0.824791	0.251017	0.808903	0.920083	0.125899	0.554538
IPI00219673.6	GSTK1	Isoform 1 of Glutathione S-transferase kappa 1 S-transferase	5.68043	9.80284	6.9731	8.42864	11.3853	4.9871	12.0997	9.24005	14.014	10.4404	7.07338	7.63538	6.12538	7.48862	5.43809	0.125644	0.382219	1.20135	0.175951	0.79869
IPI01013559.1	PDIA6	cDNA FLJ58502, highly similar to Protein disulfide-isomerase A6 to	98.0537	81.1096	76.2571	108.353	140.439	77.5041	68.2852	59.8965	88.2363	109.327	129.472	103.58	92.6616	86.6123	75.6517	0.3291	0.198956	0.799759	0.830643	0.967801
IPI00018140.3	SYNCRIP	Isoform 1 of Heterogeneous nuclear ribonucleoprotein Q nuclear	23.5458	19.7229	14.6031	18.1992	17.6954	20.224	26.4006	19.8807	19.3036	21.389	12.3908	13.5357	20.4595	17.3468	6.55229	0.0351351	0.205101	1.14325	0.13624	0.749578
IPI00783492.1	LTBP4	Isoform 2 of Latent-transforming growth factor beta-binding protein 4 growth	0.324277	0.225844	0.235909	0.345295	0.428361	1.00626	0.228031	0.305004	0.404244	0.308726	0.331229	0.221074	0.251948	0.139197	0.1137	0.19545	0.39208	1.44405	0.101162	0.677795
IPI00291922.2	PSMA5	Proteasome subunit alpha type-5	7.93868	8.24603	8.80486	9.52752	5.42454	6.01431	6.43973	5.76372	4.54538	6.91103	6.42368	3.27252	5.63025	5.8462	3.68305	0.0102122	0.0406216	0.742938	0.0123687	0.622301
IPI00102069.5	EIF3M	Eukaryotic translation initiation factor 3 subunit M 3	2.69316	1.12459	2.91561	2.40644	4.00277	2.0926	4.1402	2.4158	3.6754	4.70045	1.33053	1.0269	2.14221	1.68191	0.75991	0.0161571	0.287521	1.29537	0.0550428	0.528166
IPI00843975.1	EZR	Ezrin	7.73767	8.7586	11.8105	25.3656	15.6143	9.65382	7.76938	8.96995	13.8624	6.15859	10.9541	8.67702	8.8073	5.25066	11.0594	0.216262	0.237966	0.669885	0.205196	0.645845
IPI00970818.1	TPM1	tropomyosin alpha-1 chain isoform 5 5	0.148157	0.474507	0.715984	0.173571	0.362286	2.38899	0.367572	0.286518	2.16911	2.28754	4.25276	0.13361	1.78448	2.39313	0.0949295	0.195681	0.0782351	4.00091	0.155437	4.6193
IPI00980553.1	DECR1	cDNA FLJ50204, highly similar to 2,4-dienoyl-CoA reductase, mitochondrial to	2.00139	3.1974	0.789932	4.30556	3.2025	4.63799	4.15601	4.39633	6.10419	5.68713	4.03985	3.64925	4.08716	4.30645	5.43056	0.00974744	0.0151359	1.85093	0.0550603	1.59396
IPI00965680.1	NUP155	Uncharacterized protein	0.329466	0.328941	0.699938	0.610685	0.341794	0.406549	0.343862	0.636397	0.637501	0.110346	2.39811	0.582609	0.659434	0.671193	1.46622	0.0577216	0.789292	0.923763	0.118883	2.50022
IPI00922451.1	HMGCR	cDNA FLJ59310, highly similar to 3-hydroxy-3-methylglutaryl-coenzyme A reductase to	0.298148	1.43237	0.306764	0.669567	0.49107	0.198031	0.269901	0.418384	0.288511	0.247328	0.558682	0.487779	0.281967	0.240265	0.168533	0.163184	0.166334	0.444714	0.246336	0.543237
IPI00746777.3	ADH5	Alcohol dehydrogenase 5;Alcohol dehydrogenase class chi chain;Alcohol dehydrogenase class-3;Alcohol dehydrogenase class-III;Glutathione-dependent formaldehyde dehydrogenase;S-(hydroxymethyl)glutathione dehydrogenase;RcADH5;Alcohol dehydrogenase 5 (Class III), chi polypeptide;ADH5 protein;Alcohol dehydrogenase 5 (Class III), chi polypeptide, isoform CRA_a;cDNA, FLJ92689, highly similar to Homo sap…	19.5257	22.2387	26.8491	26.8342	24.5287	15.0407	19.2422	21.3683	17.196	21.4603	18.6577	12.9879	21.2604	19.8092	14.9492	0.016156	0.0257618	0.786051	0.014946	0.730682
IPI00746004.2	RPS27L	40S ribosomal protein S27-like	6.91965	4.93346	2.4163	2.00834	3.75601	0.18915	0.176141	0.515306	5.53929	0.254864	0.175021	0.266573	0.211393	2.10599	0.148424	0.0304074	0.0899005	0.333175	0.0146776	0.145125
IPI00783097.4	GARS	Glycyl-tRNA synthetase	0.150215	0.220339	0.173619	0.12075	0.25582	0.728954	1.29441	0.368618	0.196854	0.464065	0.182163	0.312451	0.244109	0.147175	0.406859	0.0480492	0.0895143	3.3157	0.205896	1.40403
IPI00010796.1	P4HB	Protein disulfide-isomerase	111.98	102.352	108.413	84.9299	103.673	80.4154	77.2306	74.781	108.436	87.3418	108.85	80.9355	79.9208	101.786	53.5272	0.194686	0.0639514	0.837402	0.162009	0.831174
IPI00032827.1	SF3B14	Pre-mRNA branch site protein p14 p14	0.80625	0.708923	0.67017	0.855951	0.136673	0.893104	0.195386	0.261304	2.2719	1.62046	0.167067	0.127132	0.420186	0.682594	0.156931	0.155415	0.372358	1.64953	0.0898027	0.488964
IPI00017617.1	DDX5	Probable ATP-dependent RNA helicase DDX5 DDX5	3.22523	1.50953	2.58274	1.02087	1.00445	2.05381	3.27933	2.85838	3.66471	2.24887	5.12304	3.95068	3.01969	2.27174	1.79104	0.145881	0.119454	1.50973	0.107606	1.72927
IPI00304692.1	RBMX	Heterogeneous nuclear ribonucleoprotein G	11.5139	10.5656	14.426	12.3882	15.0365	9.258	7.39013	8.67041	9.51036	5.93604	13.5742	5.10107	10.4788	10.0868	10.3081	0.0208296	0.00301066	0.637647	0.118094	0.775048
IPI00215764.1	MTA1	Isoform Short of Metastasis-associated protein MTA1 protein	0.0924105	0.175033	0.361082	0.242726	0.416503	0.481731	0.268129	0.464291	0.554785	0.729965	0.218848	0.136096	0.645013	0.340352	0.367139	0.104826	0.0359746	1.94051	0.449857	1.32591
IPI00063234.1	PRKAR2A	Uncharacterized protein	3.91253	0.487948	3.39121	0.788947	1.61799	0.318927	0.20215	0.299764	6.20444	0.573554	0.334204	0.289172	0.970164	0.487543	1.21655	0.48293	0.714479	0.745084	0.116027	0.323341
IPI00916480.1	PTMA	Uncharacterized	27.156	19.4231	11.3971	11.2006	10.2305	32.4782	17.6696	18.8188	17.389	20.9126	24.6344	11.4209	22.6478	25.5332	5.18161	0.525171	0.233852	1.35086	0.711388	1.12607
IPI00465248.5	ENO1	Isoform alpha-enolase of Alpha-enolase	218.214	157.597	149.272	164.986	176.387	139.199	142.261	161.479	202.868	161.658	265.212	133.168	159.82	208.731	114.666	0.836993	0.497039	0.931916	0.922763	1.01747
IPI00009923.1	P4HA1	Isoform 1 of Prolyl 4-hydroxylase subunit alpha-1 4-hydroxylase	5.83325	7.24106	18.6875	7.97343	18.2333	1.59527	8.101	12.5212	1.53358	0.306785	2.79142	3.89332	1.36585	0.197976	1.84958	0.0235062	0.103972	0.415016	0.025817	0.174201
IPI00983652.2	FUBP1	cDNA FLJ61021, highly similar to Far upstream element-binding protein 1 to	2.61009	2.81084	2.01922	2.88906	4.8588	1.71749	0.463551	1.54832	2.85047	0.858982	1.89015	0.194387	3.20162	2.22607	1.37126	0.078786	0.0403116	0.489782	0.105114	0.584901
IPI00387120.1	Ig	k	2.15442	1.85408	1.31349	1.18304	0.418036	0.225	0.212259	0.23778	0.862801	0.193218	0.0998911	0.104516	1.05716	2.40727	0.472406	0.102719	0.0217153	0.250043	0.32415	0.598182
IPI00239077.5	HINT1	Histidine triad nucleotide-binding protein 1 1	4.79955	3.2085	4.50086	3.61977	13.1985	1.70681	1.83452	1.81567	2.33529	2.82216	3.86803	2.7614	3.08849	2.62916	3.93619	0.080632	0.11243	0.358522	0.233866	0.555228
IPI00644653.1	HMGB1	cDNA FLJ56337, highly similar to High mobility group protein B1 to	25.3867	26.9572	29.0849	41.1551	32.5955	47.2748	31.8032	30.3095	31.0345	29.2771	42.4296	28.2113	40.9474	36.7966	23.7639	0.737841	0.526155	1.09357	0.482287	1.10935
IPI00003918.6	RPL4	60S ribosomal protein L4	39.8968	38.4017	23.8464	34.2326	32.6452	31.7195	35.3246	25.4607	42.4149	31.8628	53.7689	35.7879	42.5858	47.3043	29.5564	0.176058	0.912495	0.986746	0.160815	1.23654
IPI00426051.3	IGHG2	Putative uncharacterized protein DKFZp686C15213	0.321725	0.162803	0.30832	0.205399	0.326737	0.154278	0.28275	0.252298	0.259175	0.217834	0.22914	0.86802	0.684394	0.620284	0.191074	0.0519547	0.459684	0.880264	0.128972	1.95694
IPI00798211.1	TBCB	Uncharacterized protein	0.965133	0.783606	0.694333	0.506453	0.677034	0.806139	0.764082	0.73032	0.433499	0.424842	0.210969	0.148991	0.348082	0.411111	0.342838	0.00238045	0.429018	0.871041	0.00196235	0.403135
IPI00440493.2	ATP5A1	ATP synthase subunit alpha, mitochondrial mitochondrial	70.6051	66.1331	66.3949	101.871	101.829	62.2499	70.2292	68.8078	101.786	77.445	63.6284	50.1682	58.469	67.9217	59.7017	0.0908509	0.640989	0.935319	0.0617197	0.737131
IPI00427739.1	LRRC1	Isoform 1 of Leucine-rich repeat-containing protein 1 repeat-containing	2.41412	3.00382	2.46741	4.53656	0.472505	0.196622	1.67354	4.70567	0.25653	0.244245	0.473127	2.39579	0.46019	0.293006	0.372007	0.20247	0.317537	0.548811	0.0547286	0.309755
IPI00216682.5	CNN3	Calponin-3	0.172038	0.280933	0.227006	0.540288	0.134969	2.98432	1.79564	0.567503	0.258422	0.676987	0.189281	0.327145	2.48889	0.207488	0.291972	0.243439	0.12226	4.636	0.394301	2.5861
IPI00917016.2	CPNE1	copine-1 isoform c	2.02413	3.15142	1.20339	0.919614	1.20064	0.386302	0.275018	1.48906	0.233841	0.652885	0.801348	0.991923	2.64066	1.527	0.558527	0.117654	0.0562605	0.357341	0.492566	0.767069
IPI00003627.1	ACTL6A	Isoform 1 of Actin-like protein 6A protein	0.439367	0.226565	0.415379	0.400646	0.511285	0.177908	0.273801	0.192269	0.319902	0.302457	0.31096	0.335248	0.479266	0.382624	0.617923	0.0427362	0.0353565	0.635314	0.726564	1.06661
IPI00645809.2	PDXDC1	cDNA FLJ53168	6.88044	0.267628	4.63349	0.225469	0.569789	0.362839	0.305554	0.286419	0.439733	0.635164	0.137366	0.238937	0.185193	0.120158	0.303128	0.11405	0.198955	0.161385	0.16623	0.0783014
IPI00167572.4	FAM98B	Protein FAM98B	0.271138	0.0799477	0.35931	1.04377	0.450001	0.243063	0.118306	0.241769	0.246182	0.837232	0.139855	0.207603	0.1886	0.241719	0.111746	0.329994	0.630537	0.765167	0.182076	0.403565
IPI00883857.2	HNRNPU	Isoform Long of Heterogeneous nuclear ribonucleoprotein U nuclear	62.1421	60.9308	55.3381	74.5275	72.6052	52.0599	50.3703	53.8995	48.6983	50.2691	48.9929	60.5435	44.9734	46.3501	49.3952	0.00299075	0.0164793	0.784218	0.0121383	0.76873
IPI00000874.1	PRDX1	Peroxiredoxin-1	72.2537	39.4786	67.2098	90.4908	92.1748	44.4866	61.0153	56.9175	71.4222	52.5165	58.3273	57.4446	52.1972	51.2081	42.2975	0.105732	0.206671	0.791903	0.104624	0.723089
IPI00170692.4	VAPA	Isoform 1 of Vesicle-associated membrane protein-associated protein A membrane	4.36657	9.19277	8.9476	8.81524	5.97525	5.38893	4.83964	4.38598	6.51651	4.75716	8.94264	7.52974	6.45313	5.31217	6.04524	0.0981041	0.0778877	0.694102	0.619054	0.919176
IPI00789582.2	EIF3D	cDNA FLJ51552, highly similar to Eukaryotic translation initiation factor 3 subunit 7 to	0.19283	0.320856	1.54681	1.68378	1.46338	0.239036	0.108487	0.278433	0.503757	0.229935	0.412195	0.422054	0.663607	0.169012	0.256335	0.0351415	0.0748048	0.261087	0.111916	0.369303
IPI00922290.1	cDNA FLJ53094	ighly similar to Receptor expression-enhancing protein 5	0.956674	0.975694	0.501041	0.23376	0.501492	1.16111	0.24244	0.87618	1.31686	1.20397	2.33691	1.64536	1.1281	1.50535	1.28824	0.0105328	0.21626	1.51501	0.00714079	2.49442
IPI00020567.3	ARHGAP1	Rho GTPase-activating protein 1	12.8964	10.4926	25.6396	21.2575	13.9956	13.7542	20.8287	19.5622	17.6219	19.0379	6.39791	7.46944	11.7664	11.8713	9.03234	0.0129834	0.688692	1.0774	0.0540858	0.552164
IPI00003815.3	ARHGDIA	Rho GDP-dissociation inhibitor 1	17.9163	18.1878	23.5018	31.3501	35.84	34.8213	35.6295	31.3436	40.493	36.0568	17.0169	15.7469	30.7028	27.5714	5.94262	0.0167346	0.0419659	1.40654	0.327707	0.764856
IPI00398758.1	ECI1	Isoform 2 of Enoyl-CoA delta isomerase 1, mitochondrial delta	7.36456	10.1697	8.71016	7.70236	9.94451	5.38744	3.87555	6.74304	9.45843	4.97881	2.74575	3.74068	4.26723	3.61576	9.56126	0.0336849	0.0492791	0.693607	0.0267963	0.545227
IPI00784295.2	HSP90AA1	Isoform 1 of Heat shock protein HSP 90-alpha shock	101.935	75.3638	111.972	97.4844	79.4018	73.8743	76.3947	65.033	89.5487	72.9836	116.695	65.0555	64.1643	75.0042	52.7976	0.213726	0.0659829	0.81053	0.201098	0.801697
IPI00878151.1	GSTT1	13 kDa protein	0.758121	0.314907	0.408951	0.529572	0.531006	0.209758	0.197647	0.284539	0.484914	0.425019	0.177378	0.201353	0.528949	0.274504	0.219334	0.0663212	0.0829189	0.630026	0.0493727	0.551224
IPI00377066.1	RSU1	ras suppressor protein 1 isoform 2 isoform	1.23851	2.58847	3.71922	2.78736	1.59937	4.00083	2.28786	2.36346	6.6341	2.68663	2.07039	2.82373	2.64341	4.6528	0.928131	0.398283	0.241394	1.50616	0.760756	1.09935
IPI00022648.2	EIF5	Eukaryotic translation initiation factor 5 5	0.266683	0.233517	0.657927	0.37379	0.163663	0.357719	0.568015	0.478105	0.551717	0.40388	0.293087	0.185398	0.176777	0.299785	0.182859	0.0347022	0.217378	1.39152	0.276979	0.671101
IPI00401264.5	ERP44	Endoplasmic reticulum resident protein 44 44	4.05331	3.18899	2.22437	3.33156	7.6248	2.71735	4.02475	4.12159	0.187505	0.225719	11.3711	5.92576	4.86352	4.54632	4.47132	0.0611337	0.189896	0.552166	0.221459	1.52661
IPI00025091.3	RPS11	40S ribosomal protein S11	3.44308	2.03482	1.43286	2.72527	3.68765	3.05993	1.91017	1.33886	0.841363	2.35104	6.20917	2.94854	2.28929	5.38632	2.75433	0.0725082	0.21879	0.713118	0.208848	1.47014
IPI00012503.1	PSAP	Isoform Sap-mu-0 of Proactivator polypeptide polypeptide	10.5239	6.78618	8.54156	3.8328	8.46025	5.33467	6.10038	15.9933	10.3805	7.26066	4.07274	0.301912	6.60794	15.8235	1.20239	0.520268	0.558458	1.18154	0.52812	0.73427
IPI00397526.3	MYH10	Isoform 1 of Myosin-10	2.00486	3.16894	4.94853	3.16872	2.89768	2.93732	3.32418	2.91117	3.36126	4.5096	4.71122	5.3199	4.72397	2.85918	2.8691	0.372924	0.769387	1.0528	0.256602	1.26529
IPI01015385.1	IDH2	Isocitrate dehydrogenase	22.0423	16.7548	15.6631	19.4743	28.4883	13.8652	18.0009	17.7433	28.7602	21.7569	27.0527	18.7316	18.3855	23.0533	18.4622	0.937871	0.89592	0.97758	0.825821	1.03185
IPI00930049.1	PDCD6	Uncharacterized protein	1.15149	1.19143	0.607055	1.51446	0.677081	0.573832	0.156431	1.15813	1.38453	0.318441	2.16895	1.42949	0.754399	0.743962	1.41147	0.233341	0.32346	0.698504	0.413307	1.26583
IPI00014375.3	ENPEP	Glutamyl amino	0.250087	0.566206	0.122759	0.251512	0.601902	1.3879	0.9531	0.431999	2.22607	1.74473	0.513772	0.374386	0.640025	0.315213	0.51997	0.00592074	0.0303581	3.7623	0.340965	1.3185
IPI00552772.2	HM13	Isoform 5 of Minor histocompatibility antigen H13 histocompatibility	0.0443661	1.06275	1.53933	0.288992	0.122377	0.111352	1.9587	0.341297	1.97411	1.66832	3.19386	2.83923	1.48093	1.53485	2.36379	0.0171496	0.270307	1.97978	0.00628573	3.7323
IPI00024417.1	HIP1R	Huntingtin-interacting protein 1-related protein	0.318066	0.878187	0.530123	0.452409	0.830412	0.41685	0.311262	0.334273	0.266554	0.256868	0.339527	0.407649	0.351209	0.51602	0.158549	0.0352559	0.0571942	0.526987	0.090928	0.589178
IPI00306413.3	TPPP3	Tubulin polymerization-promoting protein family member 3 member	4.22866	1.6497	0.296253	0.339198	3.43545	0.396722	0.278645	0.29852	0.376103	0.321346	6.34799	2.22129	1.20849	0.366504	0.181545	0.262727	0.107387	0.167986	0.958101	1.03785
IPI00011285.1	CAPN1	Calcium-activated neutral proteinase 1	15.4325	17.2677	18.4916	18.2927	29.4032	13.924	13.4618	16.8865	19.6669	18.7446	25.2026	25.5367	17.0748	13.4581	18.8514	0.446219	0.285985	0.836138	0.94394	1.0125
IPI00794746.1	RPL7P32	Uncharacterized	13.8537	18.1387	16.089	11.7999	23.4806	9.74255	8.69991	10.5239	16.4213	10.4281	17.9548	14.941	10.3848	11.3247	15.1979	0.0919985	0.0569006	0.66956	0.301954	0.837351
IPI00215790.6	RPL38	60S ribosomal protein	8.40589	4.78162	2.12756	2.87448	3.94575	3.31682	1.10053	4.72037	4.73348	3.40676	0.107135	0.191485	1.35023	2.34161	3.41788	0.0713293	0.473598	0.780561	0.0558092	0.334684
IPI01022532.1	METAP2	Uncharacterized protein	0.394091	0.0876744	0.407338	0.181143	0.509834	0.918849	0.4317	0.760226	0.233032	0.558411	0.19876	0.280078	0.432568	0.276778	0.193298	0.0579167	0.108979	1.83675	0.671671	0.874311
IPI00003479.3	MAPK1	Mitogen-activated protein kinase 1	0.902939	1.06194	1.69725	1.14298	2.79491	1.14338	1.40085	1.44633	1.16862	1.80763	0.34073	0.69035	2.56401	0.279302	0.113944	0.302836	0.743458	0.916683	0.241982	0.52478
IPI00304273.2	APOA4	Apolipoprotein A-IV	1.34201	4.92458	1.06437	0.203218	3.21986	4.05443	4.40212	2.91198	3.56055	0.333949	1.06503	0.127264	0.459393	0.396475	0.201702	0.0437203	0.443421	1.41928	0.11612	0.209211
IPI00025465.2	OGN	cDNA FLJ59205, highly similar to M to	7.42196	2.34064	4.39694	3.18988	3.68995	6.18083	3.6533	3.88281	1.23765	4.50148	10.2198	7.15822	6.06875	7.35232	10.1457	0.00574047	0.795346	0.924746	0.0111152	1.94611
IPI00855846.1	C6orf115	Costars family protein C6orf115	2.64836	6.06413	2.26153	3.68152	4.34724	2.279	3.02074	4.9239	3.28342	1.31549	0.466646	0.329466	3.29596	5.04621	0.49955	0.256546	0.381415	0.78002	0.152815	0.50718
IPI00983379.1	ATP5L	Uncharacterized protein	6.58325	3.61802	2.62861	8.10999	4.46574	2.26718	3.34197	3.64773	3.74613	3.08999	3.87716	3.02933	4.57097	3.62028	3.0697	0.124071	0.137055	0.633443	0.226474	0.715096
IPI00788849.1	TFG	protein TFG isoform 2	0.461307	0.2364	2.42839	2.1685	2.28596	0.196732	0.133028	0.416503	0.19405	0.698146	0.17421	0.134857	0.736624	0.323514	0.188717	0.0186266	0.0671853	0.216139	0.0646183	0.205515
IPI00909577.1	IDH3A	cDNA FLJ52894, highly similar to Isocitrate dehydrogenase to	0.198457	0.273687	0.686818	0.313666	0.358116	0.357471	1.78745	0.542728	2.91238	0.865917	1.92692	1.52838	0.327598	2.87089	1.33867	0.0836854	0.122031	3.53187	0.0391402	4.36569
IPI00921911.4	CRIP2	Protein	4.61298	2.3938	5.4934	9.38984	13.1428	6.68626	6.40678	4.45894	9.41982	5.83163	2.90895	6.1539	2.77118	1.86374	3.1238	0.127665	0.837442	0.936363	0.132655	0.480166
IPI00946099.1	SRI	Uncharacterized protein	1.6976	0.335783	0.067335	0.756441	3.34197	2.9146	2.2559	1.87228	1.84997	2.07498	3.02577	3.07375	2.11829	1.46846	1.33756	0.216029	0.189328	1.76924	0.212055	1.77828
IPI00937615.2	EEF1G	Elongation factor 1-gamma	29.0285	18.5224	30.5903	29.1031	23.0709	27.497	28.7781	23.9906	30.5034	25.355	27.173	16.0522	23.7804	18.6048	14.1125	0.0567283	0.666575	1.04458	0.103921	0.765243
IPI00006662.1	APOD	Apolipoprotein D	6.36297	8.06402	6.9379	4.34272	2.25152	11.0863	11.0448	4.12845	8.45263	4.04293	14.2136	6.21477	2.40878	8.3925	3.30351	0.651372	0.288629	1.38613	0.596876	1.23513
IPI00063903.5	HLA class I	LOC441528 HLA class I histocompatibility antigen, B-53 alpha chain	2.06494	2.13865	2.20045	4.12216	3.59153	2.51385	3.20961	3.22165	4.74136	2.63975	4.65958	2.68403	3.11579	3.87367	3.27274	0.46669	0.472145	1.15643	0.242274	1.24707
IPI00019463.3	EIF2AK2	Interferon-induced, double-stranded RNA-activa	0.478702	0.41466	0.333995	0.227636	0.543744	0.223896	0.290397	0.214984	0.184143	0.194104	0.278008	0.295494	0.211408	0.360657	0.420419	0.0251443	0.0290366	0.554112	0.231174	0.783488
IPI00655604.5	HLA-B	LOC441528 HLA class I histocompatibility antigen, B-53 alpha chain	0.157519	0.152333	0.246866	0.629553	0.196187	0.204079	0.22444	0.164391	0.294757	0.391396	1.20664	0.430027	0.641313	3.44762	0.175312	0.140442	0.841012	0.925209	0.202557	4.26842
IPI00647084.2	PDCD4	programmed cell death protein 4 isoform 3 4	0.244668	0.434793	0.394829	0.277662	0.895522	0.291022	0.661081	0.455335	0.323828	0.323447	0.190849	0.216164	0.302268	0.237896	0.14321	0.13121	0.78508	0.914232	0.119236	0.485161
IPI00218993.1	HSPH1	Isoform Beta of Heat shock protein 105 kDa shock	2.73	1.05519	0.878796	1.62777	2.06351	0.457169	0.538568	0.496994	0.597703	0.350649	0.254299	0.577703	1.36254	0.89577	0.266332	0.00732303	0.0243011	0.292161	0.0416801	0.40174
IPI00216587.9	RPS8	SNORD55 40S ribosomal protein S8	16.7815	17.7938	12.883	14.3283	22.1664	8.95194	17.2844	15.4528	18.3067	12.8438	19.3814	19.6601	14.3641	22.7343	15.4443	0.288142	0.366672	0.867625	0.509148	1.0909
IPI00027264.6	CALB2	Calretinin	1.49205	4.05668	0.969021	0.384272	0.287932	0.130335	0.164756	0.484511	1.20422	0.417023	0.284086	0.113976	0.391531	0.268687	0.174888	0.1407	0.243162	0.333916	0.159257	0.171513
IPI00982482.2	IARS	Uncharacterized protein	0.286717	0.553287	0.458375	0.412853	0.257439	0.210545	0.19665	0.258171	0.168825	0.250538	0.31968	0.336715	0.495137	0.509764	0.368644	0.0103528	0.0292794	0.550995	0.861801	1.03112
IPI00011416.2	ECH1	Delta(3,5)-Delta(2,4)-dienoyl-CoA isomerase, mitochondrial	2.53678	1.9602	2.05951	3.39591	4.00361	2.14518	1.65496	0.519106	2.15352	2.61625	3.054	2.4424	1.58788	1.96496	2.74461	0.176094	0.105982	0.651262	0.393139	0.845073
IPI00654717.1	PPA2	Uncharacterized protein	2.58793	1.76259	2.00042	3.05336	3.3258	2.54153	1.84408	0.105535	0.610685	0.346541	3.53816	2.07945	1.78571	1.73051	2.18389	0.0397892	0.0357456	0.427991	0.543247	0.889052
IPI00942120.1	STK3	Serine/threonine-protein kinase 3	0.481965	0.39183	0.551487	0.514877	0.249584	0.215282	0.111105	0.344577	0.362914	0.365312	0.126175	0.406492	0.283476	0.14539	0.226158	0.0424989	0.0651417	0.638975	0.0270833	0.542388
IPI00021840.1	RPS6	40S ribosomal protein S6	11.822	10.8589	8.28901	4.53877	8.35882	16.6275	14.0871	12.0629	17.981	14.7496	8.46435	11.8162	13.3892	13.5931	9.6766	0.0055652	0.00501552	1.72128	0.147091	1.29799
IPI00412714.3	SERBP1	Isoform 4 of Plasminogen activator inhibitor 1 RNA-binding protein activator	6.82297	7.42505	5.96201	8.09988	4.26723	11.2621	8.87041	9.9053	10.3395	11.1155	15.2464	5.99891	7.28536	10.0938	3.15819	0.151436	0.00211218	1.58064	0.433563	1.28258
IPI00956024.1	SEC23B	protein transport protein Sec23B isoform 2 isoform	2.08406	2.18102	2.81318	1.76064	2.53081	0.514271	1.35548	3.51299	3.31751	0.250659	1.17609	1.2422	0.918594	0.410997	0.438394	0.0893014	0.530083	0.787259	0.000480478	0.368196
IPI00219025.3	GLRX	Glutaredoxin-1	1.94113	1.27474	5.97153	2.25746	2.0913	0.934975	1.90105	2.24934	2.77252	2.51804	6.66082	5.08836	2.00973	2.88526	2.46348	0.265322	0.509429	0.766534	0.386156	1.4116
IPI00019872.1	HSD17B2	Estradiol 17-beta-dehydrogenase 2	2.6653	3.9381	1.63422	0.204788	2.41764	0.380983	1.82336	3.5801	0.257028	1.97698	0.183354	0.432478	0.205798	0.34073	2.58453	0.242209	0.529881	0.738344	0.104487	0.345016
IPI00329633.5	TARS	Threonyl-tRNA synthetase, cytoplasmic	0.421031	1.62665	0.693948	1.19053	0.200184	0.795426	0.170779	0.80335	0.237319	0.343171	1.5466	1.22816	1.04638	1.02484	1.30369	0.0337926	0.269756	0.568696	0.2036	1.48818
IPI01013441.1	PRTN3	Uncharacterized protein	0.131015	0.398928	0.19283	0.198471	0.306381	0.244143	0.162566	0.264603	0.322887	0.70696	0.256512	0.270369	0.560855	0.323738	0.20194	0.619051	0.408557	1.38573	0.357372	1.31426
IPI00607732.1	NCLN	Isoform 2 of Nicalin	0.493595	0.308213	0.2364	0.685772	0.235402	0.0791811	0.211466	0.159475	0.467585	0.150684	0.356506	0.277623	0.307104	0.131415	0.119933	0.18567	0.146335	0.54527	0.172647	0.608652
IPI00965722.2	CCT5	cDNA FLJ52361, highly similar to T-complex protein 1 subunit epsilon to	11.3491	12.1982	9.77638	9.24581	15.5895	6.29497	2.59836	5.78934	0.175397	4.21315	6.61389	5.00962	9.69338	4.22309	7.25211	0.000769783	0.00113848	0.327916	0.00910835	0.563836
IPI00658205.1	RAD50	Uncharacterized protein	0.415638	0.372007	0.462556	0.226848	0.165718	1.05424	0.139467	0.874482	0.433589	0.267943	0.353921	0.404497	0.651258	0.338259	0.177969	0.387297	0.279638	1.68601	0.570086	1.17235
IPI01011577.1	ERLIN2	Uncharacterized protein	2.31867	2.39164	2.47118	1.5619	3.35334	3.01446	2.0025	0.757123	2.08753	0.408583	3.23418	2.18753	3.28957	1.39088	2.59458	0.241379	0.21242	0.683672	0.798277	1.0496
IPI01015355.1	ACO2	Uncharacterized protein	16.9757	13.1492	15.6642	20.3803	20.7408	16.5356	12.4813	15.2951	26.1856	20.0983	22.001	20.7638	18.2636	20.5505	21.8824	0.357713	0.797678	1.04241	0.0847156	1.19044
IPI00023640.3	PDCD5	Programmed cell death protein 5 5	0.672357	0.594727	0.563153	0.230958	0.530748	0.72613	0.61391	0.328804	1.04964	0.312862	0.251826	1.10803	0.512563	0.225	0.640646	0.888224	0.593484	1.16953	0.874885	1.05638
IPI00550451.1	PPP1CA	Serine/threonine-protein phosphatase PP1-alpha catalytic subunit subunit	0.701541	0.564521	0.204887	0.254282	1.37002	0.843114	0.157891	0.404413	0.693612	0.612508	2.05523	1.20439	0.17912	1.26778	1.17707	0.128416	0.760548	0.87603	0.168626	1.90084
IPI01014563.1	FTL	Ferritin light chain	3.29505	1.14814	6.56275	3.04111	2.17226	4.26132	4.03817	1.67865	3.65381	0.946517	5.87097	5.80703	9.19915	6.57276	0.127556	0.218821	0.779866	0.898833	0.235004	1.70029
IPI01010866.1	ITIH4	cDNA FLJ51742, highly similar to Inter-alpha-trypsin inhibitor heavy chain H4 to	2.68366	2.15846	0.169106	4.31452	1.53592	8.47257	5.90771	3.12835	12.3035	5.97608	20.4283	10.336	1.09293	4.60595	4.27345	0.162194	0.02797	3.29492	0.155822	3.7505
IPI00027988.1	CTCF	Transcriptional repressor CTCF	0.232677	0.181319	0.135748	0.418761	0.299889	0.231246	0.284066	0.829262	0.61848	0.415206	0.447606	0.246336	0.210589	0.181231	0.229251	0.101403	0.121237	1.87502	0.895132	1.03675
IPI00980998.2	PRCP	cDNA FLJ57232, highly similar to Lysosomal Pro-X carboxypeptidase to	1.03656	0.878248	0.818015	0.224206	0.444237	0.395623	0.146899	0.259229	0.236662	0.193432	0.23778	0.357571	0.133536	0.291709	0.118265	0.00778121	0.0419606	0.362173	0.0364545	0.334835
IPI00012795.3	EIF3I	Eukaryotic translation initiation factor 3 subunit I 3	0.323581	2.24747	1.31194	0.496787	1.90343	2.85047	1.74654	0.345486	2.28739	0.521847	0.184143	0.244736	2.22808	2.06881	0.265945	0.692083	0.647981	1.23372	0.680297	0.794453
IPI00062120.1	S100A16	S100A16 Protein S100-A16	0.619253	0.206899	0.685439	0.26893	0.130083	0.34683	0.128265	0.764771	0.528766	0.346493	1.14045	0.643896	0.766044	0.577703	0.464677	0.108405	0.798814	1.10705	0.0716149	1.88044
IPI00909681.1	SHMT	Serine hydroxymethyltransferase	0.157628	0.511002	0.364225	0.209366	0.536742	1.00132	0.337206	0.245229	0.360882	0.432568	1.2743	1.04218	0.527887	0.820628	1.31094	0.00731068	0.468261	1.33629	0.00816743	2.79709
IPI00029764.1	SF3A3	Splicing factor 3A subunit 3 3	1.92239	2.15651	1.07975	1.01241	0.892114	3.69481	1.70067	0.360307	1.75881	2.51943	4.55642	4.39846	4.03341	1.96401	2.6997	0.0180877	0.366109	1.42061	0.0102574	2.49916
IPI00250297.3	AASDHPPT	L-aminoadipate-semialdehyde dehydrogenase-phosphopantetheinyl transferase	0.403013	0.344912	0.474704	0.484041	0.325403	0.262156	0.111445	0.167845	0.218772	0.476848	0.200281	0.169775	0.393327	0.327076	0.161376	0.0644171	0.0650941	0.60877	0.0278311	0.616039
IPI00939879.1	AP1G1	Isoform 1 of AP-1 complex subunit gamma-1 complex	1.07088	1.56027	0.928324	1.94652	1.49164	0.38665	0.467358	1.00403	0.217532	0.71094	0.550723	0.205313	0.734126	0.642692	0.68658	0.00159477	0.00693656	0.398207	0.0065395	0.402912
IPI00976830.2	PRPF4B	Uncharacterized protein	0.165259	0.169129	0.201018	0.233582	0.252858	0.234019	0.308299	0.674645	0.3822	0.258565	0.183914	0.260743	0.337837	0.345438	0.62681	0.174439	0.104302	1.81801	0.122517	1.71723
IPI00981773.1	cDNA FLJ53377	highly similar to Procollagen-lysine, 2-oxoglutarate 5-dioxygenase 1	0.927809	0.50184	1.20139	0.852576	0.506664	0.985481	1.92146	1.70385	2.19436	1.29361	0.296314	0.636574	0.729358	0.414085	1.18026	0.00365872	0.0154494	2.02962	0.490577	0.816131
IPI01022396.1	SRSF9	Protein	0.673197	1.62214	0.608825	2.1041	1.33339	0.843699	1.19185	0.194158	0.30456	0.256904	0.288571	0.216404	0.637457	0.204037	0.26376	0.0174326	0.0783247	0.440133	0.0266353	0.253913
IPI00010207.1	UFM1	Isoform 1 of Ubiquitin-fold modifier 1 modifier	4.06456	2.91279	5.65019	3.09964	7.3066	4.03873	0.370309	3.54577	0.360557	0.299598	4.49587	3.57663	0.136304	5.5539	2.76523	0.102181	0.0413348	0.374014	0.324558	0.717552
IPI00297550.8	F13A1	Coagulation factor XIII A chain chain	5.72668	3.19054	3.81584	0.950725	2.70983	2.20121	4.44043	3.96302	13.282	5.64471	8.91788	7.26267	5.09471	12.2635	7.21951	0.0814597	0.258642	1.8014	0.0114232	2.48623
IPI00641577.2	SYCP1	Uncharacterized protein	0.304223	0.192456	0.296952	0.434341	0.235696	0.162296	0.259535	0.21132	0.687342	1.76406	1.12373	1.20782	0.739437	0.398679	0.161712	0.351369	0.344937	2.10741	0.0979895	2.48101
IPI00009236.5	CAV1	Isoform Alpha of Caveolin-1	2.55177	0.833815	6.55956	4.1563	0.155178	16.1975	5.25212	6.5632	5.54313	8.6518	0.385339	0.937636	7.64279	9.32498	0.590988	0.0927576	0.0514984	2.96057	0.695649	1.32442
IPI00910706.1	ABHD14B	cDNA FLJ52710, highly similar to Abhydrolase domain-containing protein 14B to	1.27925	3.9463	2.35659	1.53379	1.79328	2.03087	2.20305	0.487644	0.411368	0.39879	0.129615	0.190004	2.51612	2.47135	0.47339	0.245763	0.127227	0.507069	0.196525	0.529872
IPI00182728.2	VPS4B	Vacuolar protein sorting-associated protein 4B 4B	0.678396	0.446676	0.513986	0.11268	0.840314	0.561984	0.218909	0.228363	0.11411	0.257403	0.726483	0.8679	0.307552	0.69366	0.872181	0.0410491	0.13782	0.532693	0.306138	1.33785
IPI00902652.1	SLC9A3R1	cDNA FLJ37148 fis, clone BRACE2025333, highly similar to Homo sapiens Na+/H+ exchange regulatory co-factor (NHERF) mRNA BRACE2025333,	2.72981	1.04413	4.35901	2.40227	3.87958	1.43326	0.13555	2.13362	4.74333	1.07281	0.410314	0.305004	0.309841	1.33719	0.313101	0.0409464	0.346268	0.660333	0.0128636	0.185604
IPI00007084.3	SLC25A13	Calcium-binding mitochondrial carrier protein Aralar2 Aralar2	8.47903	3.63536	4.26575	5.63299	6.15048	4.97846	1.96564	3.42096	4.64797	2.10643	2.03454	2.83373	3.2306	3.2707	5.05917	0.0506136	0.0712759	0.607857	0.0504033	0.583331
IPI00007063.5	HDGFRP3	Hepatoma-derived growth factor-related protein 3 3	0.390015	0.64546	0.785673	0.426199	0.311024	2.33642	0.319348	2.06723	0.460158	3.50181	2.43159	0.0901893	2.57683	1.00779	1.14282	0.16557	0.110936	3.39472	0.115222	2.83353
IPI00002966.2	HSPA4	Heat shock 70	21.9371	12.8545	12.9027	15.8191	17.5695	9.77841	14.3622	13.1419	9.70952	10.9518	12.6249	14.1654	9.3957	8.38959	9.02733	0.0230794	0.051753	0.714624	0.0304644	0.661088
IPI01024839.1	TMPO	46 kDa protein	11.7664	13.5517	10.9556	11.9075	12.0905	10.2596	7.78286	8.67341	14.3472	10.9109	15.7339	10.2646	10.1873	11.9133	10.418	0.436024	0.227384	0.862328	0.76951	0.970886
IPI00216699.1	FERMT3	Isoform 2 of Fermitin family homolog 3 family	0.141072	0.111329	0.135861	0.181444	0.43173	0.320945	0.256797	0.182922	0.297013	0.341747	0.29689	0.19007	0.297384	0.244787	0.293432	0.353201	0.270579	1.39742	0.351923	1.32067
IPI00784936.1	2016-09-09	septin-9 isoform c	7.74733	3.85813	6.89763	8.89318	7.43122	4.26161	1.4934	3.61777	5.2554	5.7136	6.82439	6.3107	4.64507	3.6085	2.11726	0.064846	0.0329782	0.584072	0.0977234	0.674924
IPI00019912.3	HSD17B4	Peroxisomal multifunctional enzyme type 2 2	8.25118	6.24716	8.33221	8.33279	16.5596	0.995298	8.42047	7.13197	11.8392	7.55902	4.80321	4.29007	4.46141	8.34377	7.8762	0.283031	0.376118	0.753221	0.125017	0.623906
IPI00026848.3	LRPAP1	Alpha-2-macroglobulin receptor-associated protein	0.141493	0.108864	0.40576	0.242608	0.107336	0.148466	0.338025	0.216404	0.44224	0.376207	0.493869	0.226754	0.214121	0.295842	0.288212	0.32737	0.223299	1.51218	0.213548	1.50965
IPI00479201.3	AHCYL1	Isoform 2 of Putative adenosylhomocysteinase 2 adenosylhomocysteinase	0.856782	0.395075	0.154096	1.61586	1.57135	0.41211	0.482466	0.579066	0.312841	0.501945	0.171324	0.294614	0.34379	0.214984	0.246507	0.0528991	0.197676	0.498225	0.0893507	0.276764
IPI00953689.1	AHSG	Alpha-2-HS-glycoprotein	5.50865	5.24484	4.19799	6.92061	0.787308	14.424	11.1348	9.64713	21.2413	8.67522	14.9721	7.40192	3.56475	5.33098	2.52153	0.0233417	0.0161875	2.87397	0.399283	1.49127
IPI01011809.1	RTN4	Uncharacterized protein	0.196064	0.166697	2.841	2.9015	2.62151	3.58358	3.64091	0.199409	4.37869	2.76217	5.03328	4.04966	5.63142	5.4896	3.76826	0.0117354	0.262368	1.66897	0.00537484	2.74697
IPI00301311.1	SET	Isoform 2 of Protein SET SET	17.8481	23.4432	18.5032	19.4258	15.8818	14.7434	13.9443	15.0584	15.1737	15.829	18.9483	11.3538	17.9138	16.5195	8.53446	0.0803547	0.0290717	0.785985	0.109644	0.770434
IPI00749188.3	MXRA7	Similar to Matrix-remodeling-associated protein 7 7	0.621876	0.165534	0.289955	0.27095	0.559612	0.499342	0.321524	0.181306	0.304772	0.481664	0.252053	0.227384	0.745304	0.375166	0.456979	0.898505	0.829307	0.937461	0.822666	1.07807
IPI00644231.3	CYFIP1	Isoform 1 of Cytoplasmic FMR1-interacting protein 1 FMR1-interacting	5.75254	1.72776	1.83312	1.23405	0.917258	1.62518	2.06308	1.28467	0.791796	1.21092	0.627636	0.908904	1.05015	0.473587	1.03175	0.179922	0.372375	0.608444	0.169864	0.356924
IPI00217168.1	ATP2B4	Isoform ZK of Plasma membrane calcium-transporting ATPase 4 membrane	4.60787	1.95464	2.80655	4.03649	4.02308	4.35508	5.16511	4.16005	7.91506	5.89136	2.84061	3.74327	3.16674	4.51648	2.84593	0.022944	0.0452832	1.5771	0.916206	0.981893
IPI00013079.2	EMILIN1	EMILIN-1	1.76896	0.112002	4.2696	0.427234	0.431789	6.23202	4.51836	1.50744	4.62804	3.04639	7.47617	3.3755	1.70787	0.497028	6.67099	0.161793	0.0484528	2.84357	0.152824	2.81437
IPI01009795.1	SNX4	cDNA FLJ50837, highly similar to Sorting nexin-4 to	0.542878	0.266148	0.202979	0.380957	0.21002	0.306891	0.449035	0.415869	0.340565	0.44547	0.784421	0.372265	0.327099	0.338705	0.27401	0.577335	0.354243	1.22137	0.409454	1.30787
IPI00012197.1	DCTPP1	dCTP pyrophosphatase 1	0.621876	0.264181	0.318287	0.768065	0.720815	0.4542	0.193647	0.293534	0.370745	0.149633	0.464838	1.14934	0.271289	0.266443	0.43712	0.28884	0.0811879	0.542754	0.917339	0.961311
IPI00171798.1	MTA2	Metastasis-associated protein MTA2	0.361032	0.286241	0.322484	0.624382	0.214656	0.255713	0.389393	0.244499	0.29331	0.350455	0.251756	0.249706	0.157465	0.260165	0.25835	0.17956	0.495646	0.847731	0.147415	0.650954
IPI01021659.1	NAP1L1	23 kDa protein	16.2031	3.17928	2.55337	4.07077	0.423255	6.88187	8.34667	9.50575	10.7383	9.59844	0.675721	10.9412	0.185591	0.21378	3.10674	0.152898	0.257362	1.70531	0.534099	0.572197
IPI00438229.2	TRIM28	Isoform 1 of Transcription intermediary factor 1-beta intermediary	14.7629	25.2288	21.843	18.4417	13.419	14.6507	11.9513	13.9588	8.23632	15.1212	19.9249	17.8098	16.4886	13.5978	15.8961	0.0565239	0.0539842	0.682193	0.443899	0.893505
IPI00646448.1	PRKAG2	Isoform C of 5-AMP-activated protein kinase subunit gamma-2 protein	0.29652	0.266739	0.334157	0.213543	0.114649	0.452943	0.321101	0.872363	0.692459	0.2475	0.196391	0.428035	0.256744	0.477708	0.239202	0.0737976	0.079096	2.11027	0.30663	1.30391
IPI00903145.1	RDX	Radixin	0.684584	0.74221	0.551487	1.52172	0.538232	1.0893	1.82804	1.64182	0.372652	2.33011	1.81806	0.47136	1.18583	0.280875	0.43413	0.219477	0.140596	1.7983	0.932	1.03765
IPI00003269.1	ACTBL2	Beta-actin-like protein 2	533.742	0.139332	0.202361	0.435124	335.205	0.148003	0.195603	0.393709	0.454389	0.39513	5.85431	142.567	0.375062	0.209569	0.533145	0.181072	0.192482	0.00182453	0.269258	0.171939
IPI00375446.1	ITPA	inosine triphosphate pyrophosphatase isoform b b	1.1162	2.2338	1.31933	1.51677	2.04826	1.20974	0.512349	1.82323	0.177304	0.422083	0.266924	0.493698	0.206126	0.871637	0.177575	0.00674241	0.0615999	0.503344	0.00190411	0.244823
IPI00220528.6	SNRPF	Small nuclear ribonucleoprotein F	0.97942	0.534996	0.20106	0.691883	0.731485	0.172707	0.312018	0.326805	1.0398	0.492809	0.655696	1.30116	0.272476	0.712618	2.17648	0.234972	0.447084	0.746814	0.314842	1.63068
IPI00221232.9	GNG12	Guanine nucleotide-binding protein G(I)/G(S)/G(O) subunit gamma-12 subunit	1.08305	4.57794	1.87892	1.72082	5.25431	5.0711	2.33561	2.12344	5.8377	2.71622	3.39992	7.50421	4.40762	3.52861	1.98014	0.585089	0.547529	1.24588	0.341472	1.43441
IPI00760928.1	KANK2	Isoform 3 of KN motif and ankyrin repeat domain-containing protein 2 motif	0.553978	0.102479	1.19731	0.846745	0.155092	1.81516	0.599238	0.318177	1.24117	0.288232	1.94558	1.25632	0.943307	1.91521	0.595346	0.153217	0.460856	1.49249	0.056279	2.33077
IPI00916572.1	RPL31	Protein	1.54756	1.77141	3.18016	0.528436	0.238209	2.8017	1.06378	2.01754	2.74575	1.30667	5.17084	2.60413	1.5251	2.59206	3.92148	0.0948109	0.425565	1.36743	0.0709797	2.17645
IPI00005154.1	SSRP1	FACT complex subunit SSRP1	0.413197	0.802737	0.238556	1.18337	0.580593	2.02286	1.86051	1.88753	2.3198	2.32866	0.405198	2.3933	0.667158	1.70929	2.10264	0.00578515	0.000177792	3.23738	0.111029	2.26121
IPI00640908.4	TBC1D9B	Isoform 2 of TBC1 domain family member 9B domain	0.215985	0.63446	0.545783	0.341747	0.504351	0.421061	0.175872	0.175933	0.281987	0.340399	0.303759	0.169235	0.186442	0.333671	0.134455	0.0388851	0.0996322	0.622235	0.0386994	0.502854
IPI00024403.1	CPNE3	Copine-3	3.34522	2.49839	1.15549	1.62902	1.43445	1.51835	1.50702	1.48875	2.18253	1.67075	3.2569	3.90765	2.30585	1.75808	1.9844	0.164072	0.459991	0.831537	0.302401	1.31307
IPI00645867.2	MYOF	Isoform 6 of Myoferlin	4.13188	5.59059	5.87382	6.96537	5.91919	8.03056	9.79809	6.77349	11.199	11.8425	6.69368	12.3138	10.188	10.0297	8.76589	0.0072934	0.0117156	1.67283	0.00953337	1.68503
IPI00010800.2	NES	Nestin	1.55844	1.05973	0.800792	1.20405	0.293941	2.67511	0.274695	1.5111	1.74618	1.5132	0.299059	0.501145	0.286042	1.1088	0.288291	0.0524243	0.245592	1.57013	0.105561	0.505056
IPI00008998.3	PTPLAD1	3-hydroxyacyl-CoA dehydratase 3	2.54647	1.33422	2.27348	2.52066	4.04265	2.40294	3.17356	4.83093	1.0057	3.85118	0.948882	0.188927	1.73339	2.20962	1.2844	0.06519	0.535301	1.20026	0.0528946	0.500511
IPI00302925.4	CCT8	59 kDa protein	18.6073	18.0785	14.5919	22.302	21.5916	17.0406	17.7113	18.8697	15.4379	15.4443	27.5141	21.7027	18.2813	13.7676	15.8181	0.528301	0.214784	0.887911	0.894973	1.02009
IPI00219147.4	CSDA	Isoform 2 of DNA-binding protein A protein	0.675581	0.586946	0.824619	1.53209	0.759752	1.42524	1.74134	1.38013	1.87306	1.7841	0.347143	0.391423	1.46958	1.36784	0.720964	0.0135234	0.00684298	1.87346	0.956668	0.981265
IPI00219153.4	RPL22	60S ribosomal protein L22	9.36384	10.8913	8.86119	12.1426	12.8687	6.64468	6.2745	6.56957	15.9281	6.92829	11.1773	5.74657	5.98977	10.673	10.696	0.448384	0.293106	0.78232	0.217268	0.818117
IPI00385834.3	KHDRBS1	Isoform 2 of KH domain-containing, RNA-binding, signal transduction-associated protein 1 domain-containing,	6.66821	3.13703	6.229	5.08025	4.92902	3.64647	2.88086	3.07162	4.72757	3.47641	7.37734	3.62781	4.3346	2.74404	2.73057	0.221463	0.0548735	0.683584	0.353559	0.799215
IPI00916253.1	MDH1	Uncharacterized protein	0.146117	0.340683	0.156887	0.408951	0.326216	0.313448	0.135278	0.207	0.275018	0.278143	0.537524	0.253525	0.638341	0.205015	0.303991	0.24305	0.598534	0.876733	0.300672	1.4058
IPI00169383.3	PGK1	Phosphoglycerate kinase 1	115.536	85.9842	87.8031	108.008	116.517	104.851	97.3426	96.3224	167.069	119.437	195.971	121.895	94.5955	140.614	97.9111	0.393044	0.372731	1.13851	0.220734	1.26689
IPI01013861.1	CAPN6	Uncharacterized protein	0.331642	0.121616	0.945599	0.159962	0.308085	0.617452	0.453539	0.482433	0.966673	0.911112	0.409944	0.18147	0.194225	0.192669	0.227116	0.036374	0.130021	1.83791	0.434437	0.645681
IPI00011876.3	MTAP	cDNA FLJ59758, highly similar to S-methyl-5-thioadenosine phosphorylase to	2.68161	5.60766	4.94065	5.86528	0.531595	3.02199	5.56546	5.72549	0.257225	6.19713	0.32197	0.292762	5.89136	0.262648	0.105477	0.177711	0.883941	1.05811	0.132313	0.350246
IPI00166240.4	ZNF185	zinc finger protein 185 isoform 9 isoform	0.174742	0.147655	0.0968167	0.238374	0.366631	0.31347	0.102358	0.294921	0.359659	0.339245	0.389258	0.766576	0.218878	0.606719	0.555362	0.018659	0.273263	1.37632	0.0286626	2.47681
IPI00748145.2	GNAI2	Isoform 1 of Guanine nucleotide-binding protein G(i) subunit alpha-2 nucleotide-binding	2.04997	2.14726	7.2115	2.55531	1.9711	19.6302	6.44018	4.9123	13.1291	0.555747	12.2321	13.2967	7.26317	18.3766	4.64539	0.099191	0.164999	2.80308	0.0255911	3.50257
IPI00479997.4	STMN1	Isoform 1 of Stathmin	10.7682	7.17063	4.15918	6.60199	2.49286	1.59981	2.88026	3.77558	0.259607	3.12791	7.8593	3.47208	5.61428	3.51738	2.09231	0.068317	0.0480194	0.373265	0.351568	0.723094
IPI00335385.4	DCPS	Scavenger mRNA-decapping enzyme DcpS	0.35936	0.238937	0.376103	0.287354	0.558411	1.45297	0.841421	1.2291	0.549084	0.290055	0.259499	0.159143	0.205641	0.473849	0.23308	0.0142528	0.0743722	2.39683	0.240296	0.73137
IPI00141318.2	CKAP4	Cytoskeleton-associated protein 4	39.8222	40.7775	41.3983	44.2192	44.2038	40.3193	39.0974	43.2132	58.6801	46.1193	30.0418	39.1543	37.9624	34.1024	35.3932	0.0249913	0.395932	1.08083	0.00941499	0.839527
IPI00985211.1	VH26	Similar to VH-3 family (VH26)D/J protein	0.233436	0.430475	0.211481	0.243569	0.258171	0.606845	0.168218	0.260111	1.36009	0.259283	0.245127	0.336249	0.713903	2.38551	0.803795	0.269919	0.314063	1.92759	0.184031	3.25647
IPI00027270.1	RPL26	60S ribosomal protein L26	0.173331	0.128943	0.414976	0.262393	0.141218	0.759067	1.52901	0.294717	1.81378	0.831737	3.25984	0.301891	0.228886	0.266499	1.13879	0.239949	0.039202	4.66455	0.233472	4.63564
IPI00178431.12	RECQL	ATP-dependent DNA helicase Q1	0.250555	0.18277	0.495171	0.24579	0.678349	0.45266	0.31701	0.419197	0.610854	0.325493	0.600776	0.32828	0.625942	0.974545	1.94909	0.105091	0.630128	1.14713	0.139608	2.41744
IPI00411540.3	HMGB3	Uncharacterized protein	1.34462	1.59317	2.2032	0.360033	3.66243	0.549008	0.393327	1.40932	0.465225	0.157989	0.366783	0.26192	2.49683	0.231808	3.18899	0.252112	0.0861631	0.324645	0.549939	0.714396
IPI00140420.4	SND1	Staphylococcal nuclease domain-containing protein 1 1	11.2426	6.87329	8.5837	6.10081	10.8664	7.63856	13.6706	8.25518	3.46967	8.6632	2.41496	1.91906	7.9019	8.44033	1.92412	0.104916	0.843752	0.954895	0.0529336	0.517565
IPI00893541.1	PDIA3	14 kDa protein	10.673	12.0478	7.66295	6.9187	10.6546	7.76561	9.99565	9.74661	15.0209	7.7834	6.61389	8.81219	6.9139	9.29271	3.17554	0.158413	0.782969	1.04911	0.10928	0.725821
IPI00743503.1	HLA-B	HLA class I histocompatibility antigen, A-34 alpha chain	0.176752	0.722415	1.51856	2.0845	1	4.88277	2.96678	1.42415	0.938807	0.179331	5.86487	2.9229	12.7286	11.2777	3.21942	0.0122662	0.324131	1.88866	0.0392066	6.54526
IPI00030363.1	ACAT1	Acetyl-CoA acetyltransferase, mitochondrial	4.80954	5.55621	7.217	1.29253	4.64089	2.42335	2.04089	2.38618	0.213795	2.3264	6.41789	4.60212	2.93244	3.20917	3.35334	0.0380521	0.0401164	0.399326	0.621613	0.872377
IPI00007676.3	HSD17B12	Estradiol 17-beta-dehydrogenase 12	0.859161	1.87813	1.97137	0.401397	1.05951	0.223927	0.993299	0.313622	0.199796	0.245144	0.531411	0.671845	0.228632	1.20539	0.278336	0.0461789	0.0482614	0.320247	0.108415	0.472579
IPI00296215.2	EPCAM	Epithelial cell adhesion molecule	7.80663	5.36768	5.62206	4.61362	3.73032	0.392129	5.21548	7.08811	7.23704	1.91879	0.182719	1.23859	2.64524	1.1452	1.41	0.0213216	0.518403	0.805132	0.00160683	0.243982
IPI00893918.1	VARS	Valyl-tRNA synthetase	1.0319	2.38965	2.31466	1.57385	1.25154	1.95355	2.21806	0.19927	0.37229	1.91773	5.11736	1.13532	1.15509	1.47253	3.66446	0.337398	0.482345	0.777998	0.392279	1.46524
IPI00168262.2	GLT25D1	Procollagen galactosyltransferase 1	0.17211	0.384618	0.284303	0.287952	0.188809	0.399648	0.211012	0.23363	0.719118	0.534255	0.223617	0.258709	0.200212	0.343028	0.112711	0.114545	0.186338	1.5918	0.523341	0.863776
IPI00910670.1	cDNA FLJ53447	highly similar to Syntaxin-binding protein 2	0.437999	2.96247	0.280272	1.16207	0.234962	0.222257	0.339622	0.17953	0.219669	0.605542	0.876849	0.407113	1.11049	0.206298	0.303401	0.321427	0.245632	0.308525	0.460781	0.571934
IPI00003833.3	MTCH2	Mitochondrial carrier homolog 2	2.66106	1.074	3.27365	3.46583	3.99141	1.6366	1.79303	1.11111	3.65457	1.87735	3.23127	1.5658	1.30622	1.49185	1.47652	0.215654	0.221704	0.696301	0.122019	0.627104
IPI00966238.2	HSPA9	cDNA FLJ51907, highly similar to Stress-70 protein, mitochondrial to	22.302	25.1119	32.5548	37.5333	37.2276	25.4748	27.9912	27.6978	52.3711	33.0436	51.8187	43.9838	30.0168	25.7536	41.6199	0.462077	0.696733	1.07658	0.218435	1.24858
IPI00953325.1	EWSR1	Uncharacterized protein	1.3436	1.34826	1.68028	2.22669	1.76749	1.20748	0.487171	2.23442	0.286399	0.119576	0.214285	0.26497	1.40913	0.219806	1.51551	0.0925972	0.110179	0.518155	0.0317505	0.433129
IPI00793345.2	SYCP2	Uncharacterized protein	0.158055	0.193553	0.186507	0.403237	0.692027	0.302436	0.207158	0.443806	4.05078	0.582771	0.130688	0.138274	0.169118	0.76993	0.237352	0.346918	0.345194	3.42049	0.818412	0.884891
IPI00843876.1	TNPO1	Isoform 2 of Transportin-1	0.917004	1.02754	0.685391	1.0549	1.23988	0.47698	0.24702	0.304962	0.855714	0.216	0.370309	0.182125	0.312646	0.773461	0.173139	0.00241216	0.005942	0.426558	0.002571	0.367875
IPI00289275.4	CILP	Cartilage intermediate layer protein 1 1	0.985823	1.64981	0.400257	0.314777	0.312624	0.223214	0.259859	0.417573	0.611108	0.491853	0.206641	0.506488	0.919359	0.315191	0.247414	0.366744	0.27986	0.546942	0.354543	0.599214
IPI00296534.2	FBLN1	Isoform D of Fibulin-1	9.48009	8.89873	8.6482	7.03622	4.96846	15.8082	7.96238	10.3668	16.7734	6.6364	12.3814	8.5315	5.94798	10.8694	7.80176	0.220129	0.151077	1.47437	0.382869	1.16654
IPI01026156.1	AHSA1	Protein	1.65623	2.03891	0.304645	2.05737	8.47903	0.611405	0.48599	0.227368	0.297962	0.136758	5.42529	0.265429	1.90382	3.14465	2.7614	0.154636	0.148376	0.121042	0.904434	0.928758
IPI00171199.5	PSMA3	Isoform 2 of Proteasome subunit alpha type-3 subunit	6.29192	2.85977	4.7565	4.1425	3.91497	2.91602	3.03859	3.42048	3.22701	2.22715	5.73423	3.90683	3.96742	3.82882	4.3304	0.0447297	0.0631509	0.675111	0.954424	0.990988
IPI00790752.1	NDUFB9	Uncharacterized protein	0.972048	2.19634	0.7946	1.1632	2.22222	0.921464	0.722265	0.594727	1.66129	0.386677	2.1634	3.46727	0.622221	1.81378	1.71927	0.116023	0.147479	0.583313	0.405695	1.33171
IPI00855858.1	ARMC10	Isoform 4 of Armadillo repeat-containing protein 10 repeat-containing	0.252735	0.440282	0.379876	0.474605	0.342435	0.165729	0.30475	0.256086	0.496409	0.331757	0.325381	0.421732	0.699357	0.153978	0.149976	0.797666	0.347637	0.822638	0.807405	0.926183
IPI00027350.3	PRDX2	Peroxiredoxin-2	118.834	40.5857	37.5854	40.1325	53.8584	22.6164	19.527	32.9613	47.5575	59.3222	37.7368	16.5665	32.1846	24.1274	17.2186	0.110836	0.25256	0.625385	0.101693	0.439299
IPI00784758.1	IGHA2	Putative uncharacterized protein DKFZp686M08189	0.855358	0.137824	0.287693	0.803517	0.222565	2.27789	2.66623	0.989657	0.949737	2.71377	4.30526	0.279361	0.421499	3.55315	0.831219	0.143755	0.017449	4.16015	0.172161	4.07051
IPI00847815.1	SLC25A35	Isoform 3 of Solute carrier family 25 member 35 carrier	0.227242	0.18826	0.128194	0.389097	0.340069	0.286777	0.586133	0.603866	0.524386	0.356803	0.599695	0.5104	0.249861	0.322752	0.153435	0.108725	0.0279849	1.85249	0.279954	1.44253
IPI00024911.1	ERP29	Endoplasmic reticulum resident protein 29 29	9.24838	9.29014	11.0257	11.9224	19.4392	9.92591	9.36254	11.8048	11.1163	12.5777	4.53908	6.63272	11.3341	7.06456	6.62858	0.0505182	0.562645	0.899245	0.0613516	0.594149
IPI00027728.1	SLC7A1	High affinity cationic amino acid transporter 1 acid	0.580674	0.488998	0.231118	0.392618	0.735552	0.123887	0.186068	0.367725	0.364225	0.219608	0.40731	0.0681945	0.439063	0.288391	0.22388	0.0678739	0.0524125	0.519363	0.103333	0.587428
IPI00006379.1	NOP58	Nucleolar protein 58	2.06537	1.67981	1.47693	2.03115	1.67365	1.78089	2.45156	2.04585	0.572799	2.0195	2.17377	1.90316	2.57166	2.00611	2.38188	0.281425	0.974757	0.993692	0.0352277	1.23633
IPI00845510.1	MAT2B	Isoform 4 of Methionine adenosyltransferase 2 subunit beta adenosyltransferase	0.854291	0.552482	0.300055	0.492809	0.888165	0.302918	0.168638	1.28556	0.226896	0.866037	1.1068	1.34378	1.39262	0.352452	0.139371	0.5657	0.852499	0.923003	0.415878	1.40392
IPI00966305.1	PGM3	Protein	0.195698	0.0590549	0.307722	0.302205	0.204008	0.194063	0.27382	0.518279	0.471425	1.09338	0.176165	0.0827326	0.287613	0.249135	0.096208	0.0639806	0.134949	2.38701	0.576775	0.834531
IPI00515018.3	KMO	Isoform 3 of Kynurenine 3-monooxygenase 3-monooxygenase	0.112127	0.12387	0.471	0.259715	0.182276	0.304708	0.0887321	0.251896	0.527228	0.342292	0.28	0.302184	0.344673	0.451908	1.33533	0.237208	0.470726	1.31843	0.19949	2.36216
IPI00219718.3	RBP1	retinol-binding protein 1 isoform a a	3.80475	4.97467	6.90097	4.61106	0.319303	2.87408	6.10081	1.19864	3.81822	6.74912	4.55926	0.271929	6.74585	9.90118	1.00007	0.976308	0.986473	1.00631	0.86374	1.09061
IPI01012107.1	DAD1	Uncharacterized protein	7.18307	4.94956	5.04551	4.87736	8.40239	4.46079	4.15601	4.07105	6.62123	5.57279	8.0378	9.18831	4.13303	4.40029	5.45924	0.468816	0.241634	0.816927	0.90569	1.02498
IPI00719373.3	IGLC1	IGL@ protein	12.2865	4.46729	4.04209	2.22114	6.25019	16.4943	14.5294	7.92439	16.0222	21.5259	9.56258	26.2164	8.04672	15.8576	3.49187	0.0841769	0.0103127	2.61372	0.169885	2.15857
IPI00939575.1	NAGK	N-acetyl-D-glucosamine kinase	0.317296	0.157138	0.0906908	0.336062	0.251477	0.534366	0.620026	0.459998	0.474934	1.7125	0.229426	0.403712	0.976573	1.02854	0.805804	0.0925302	0.0910238	3.29829	0.0422749	2.98791
IPI00414442.4	CDK5RAP3	Isoform 1 of CDK5 regulatory subunit-associated protein 3 regulatory	1.62012	1.30279	1.13548	0.714002	1.65772	0.279399	0.593862	1.35811	0.595924	0.154856	0.28107	0.186584	0.677879	0.287573	0.987327	0.0168749	0.0357347	0.46378	0.00848961	0.376422
IPI00013212.1	CSK	Tyrosine-protein kin	0.215237	0.225531	0.15034	0.140613	0.110652	0.250816	0.430176	0.234182	0.2283	0.174791	0.513736	0.215416	0.288932	0.699453	0.232645	0.0719193	0.0998613	1.56494	0.0767631	2.3151
IPI00915274.1	SNORA56	DKC1 H/ACA ribonucleoprotein complex subunit 4 isoform 2	0.325855	0.292721	0.232065	0.305089	0.617838	0.756599	0.806306	1.04406	1.44093	0.429372	0.775877	0.0978896	0.178179	0.512954	0.736981	0.0308332	0.0286709	2.52444	0.522119	1.29788
IPI00644668.3	FHL1	Uncharacterized protein	0.316373	0.157814	0.34047	0.234117	0.151701	0.63936	0.165465	0.466355	0.257653	0.253384	0.285527	0.508035	0.325245	0.224238	0.460062	0.338588	0.268718	1.48459	0.109536	1.50199
IPI00216805.3	ALDH1A2	Isoform 1 of Retinal dehydrogenase 2 dehydrogenase	8.77744	11.0433	11.3333	3.2025	0.371517	13.354	8.81646	5.45357	7.45289	10.9769	17.1662	8.11955	13.9124	17.0169	4.844	0.235236	0.412218	1.32613	0.150004	1.75821
IPI00744364.4	SRSF7	Uncharacterized protein	11.0632	9.46433	13.6148	16.1986	11.7811	9.82665	10.0095	12.0286	14.2136	15.2042	28.4587	18.9602	15.7753	13.5123	11.6536	0.121575	0.91824	0.986488	0.1573	1.42236
IPI00607820.1	GAR1	Isoform 2 of H/ACA ribonucleoprotein complex subunit 1 ribonucleoprotein	0.139409	0.349291	0.219897	0.219334	0.867058	0.415091	0.392782	0.396832	0.372316	0.359036	1.04059	0.191405	0.305469	0.392292	0.760015	0.535748	0.840809	1.07859	0.409485	1.49849
IPI00984352.1	PRMT1	Uncharacterized protein	3.00611	2.41362	2.63591	1.71987	3.30741	2.72433	2.75337	2.86513	4.87364	2.7353	2.45275	8.45849	1.62732	6.17355	7.24357	0.11	0.291035	1.21928	0.127948	1.98394
IPI00964123.1	PAICS	Uncharacterized protein	1.52488	0.97976	1.29253	0.350163	0.435758	0.676143	0.384965	0.194265	0.456726	0.199519	1.70539	0.277296	0.219775	0.835319	0.203853	0.267027	0.0817078	0.417102	0.490066	0.707301
IPI00220573.4	MYL12A	Myosin regulatory light chain 12A 12A	26.5677	23.9126	29.7022	32.7699	31.7591	31.8363	30.8714	22.1863	34.8624	33.7239	25.6023	22.8053	28.9823	39.4759	12.8402	0.53631	0.547019	1.06059	0.544459	0.896307
IPI00963819.1	SCOC	9 kDa protein	0.31853	0.225281	0.232081	0.194562	0.124965	0.906262	1.03261	0.393954	0.2724	0.191471	0.453131	0.308042	0.267981	0.306127	0.399149	0.100256	0.11853	2.55309	0.0249738	1.58335
IPI00736859.1	HNRNPUL1	Isoform 4 of Heterogeneous nuclear ribonucleoprotein U-like protein 1 nuclear	3.48873	3.07269	1.89947	3.33665	3.11342	2.05637	1.41902	2.95672	0.240732	0.228331	0.543895	3.45264	1.96578	2.97131	2.4996	0.0777985	0.0359807	0.462826	0.269271	0.766767
IPI00220684.1	HNRNPD	Isoform 3 of Heterogeneous nuclear ribonucleoprotein D0 nuclear	51.4643	35.8649	29.3685	35.2903	40.4677	26.3184	29.4052	27.8673	27.9582	29.9337	72.8522	21.0785	28.4726	32.386	27.0583	0.4463	0.0497188	0.735145	0.840092	0.94488
IPI00000760.1	DDAH2	Dimethylargininase-2	4.20586	8.04616	3.55562	4.57858	7.19403	10.1767	6.58279	9.59378	8.59978	8.93644	10.1873	8.81585	12.5551	6.30414	5.71954	0.0524466	0.0186954	1.59134	0.0751535	1.58019
IPI00010418.6	MYO1C	Isoform 2 of Myosin-Ic	2.2642	2.19558	5.03224	3.15207	2.25308	3.63083	0.359235	0.220768	0.292762	3.38816	1.9763	4.43459	3.48631	2.61299	0.203853	0.371367	0.186586	0.529749	0.641133	0.853453
IPI00413451.3	CAP	Cytoplasmic antiproteinase	6.50658	1.31367	0.277989	0.23389	5.78854	4.83796	1.77448	1.69819	0.445069	5.33837	6.33129	7.0827	0.433108	3.51616	2.94547	0.704273	0.997556	0.998117	0.517738	1.43823
IPI00847635.1	SERPINA3	Isoform 1 of Alpha-1-antichymotrypsin	16.1348	13.0493	11.0104	26.2747	10.5035	26.9385	10.045	18.6357	47.3634	20.2016	38.3831	30.6412	9.47549	24.761	14.3721	0.393043	0.233247	1.60036	0.222953	1.52824
IPI00328113.4	FBN1	Fibrillin-1	0.184603	0.156583	0.5404	0.252998	0.220737	0.264658	0.147767	0.326035	0.305237	0.210545	1.3435	0.212937	0.327644	0.339975	2.24435	0.125676	0.800905	0.92542	0.191204	3.29694
IPI00017533.2	COX3	Cytochrome c oxidase polypeptide III	0.299723	1.08395	0.356111	0.541075	0.951384	0.308662	0.172336	0.324435	0.265485	0.45266	0.302142	0.220019	0.271721	0.194413	0.291749	0.0272573	0.0965234	0.471368	0.0684636	0.396024
IPI00030320.4	DDX6	Probable ATP-dependent RNA helicase DDX6 DDX6	0.770678	0.488625	0.534588	0.160695	0.632747	0.485216	0.200323	0.194494	1.84676	0.306466	2.93223	1.2902	0.19905	0.485822	0.531374	0.473352	0.798388	1.17235	0.317799	2.10204
IPI00936857.3	COL4A2	Uncharacterized protein	1.74436	1.67122	0.622049	1.51992	1.79614	0.841071	1.33644	2.59386	3.08934	1.74219	1.75333	5.80381	1.60492	2.38568	4.39115	0.109682	0.369013	1.30586	0.104805	2.16747
IPI00936002.1	ALDH7A1	Isoform 2 of Alpha-aminoadipic semialdehyde dehydrogenase semialdehyde	3.47641	4.38294	2.65057	4.76112	4.8249	2.41412	2.83608	5.95334	3.11191	1.51435	5.33467	8.35882	6.06917	3.46079	7.46116	0.029202	0.356009	0.787712	0.0683885	1.52691
IPI00927799.1	CTNNB1	cDNA FLJ57878, highly similar to Beta-catenin to	1.52859	2.67957	2.75547	2.57987	2.96678	2.07096	1.7582	2.0107	2.14162	2.35381	1.28904	2.5142	2.82627	1.3333	1.79216	0.262542	0.165591	0.826144	0.206764	0.779756
IPI00218448.4	H2AFZ	Histone H2A.Z	0.127432	6.26016	12.8741	8.81219	6.20788	6.43125	10.4868	6.42546	9.03672	7.11715	0.652071	0.235451	6.43973	0.69602	5.89789	0.0775246	0.658301	1.15214	0.146876	0.406081
IPI00219622.3	PSMA2	Proteasome subunit alpha type-2	7.22151	2.12756	7.49225	6.41345	2.28358	8.52677	6.65159	4.83394	1.5133	7.334	1.0184	1.67818	5.53698	0.199755	1.98729	0.0833609	0.707944	1.13005	0.0823958	0.408037
IPI00739099.2	COL5A2	Collagen alpha-2(V) chain	0.483806	0.174573	0.198018	0.287234	0.443068	0.1749	0.455777	0.31137	0.425609	0.259517	0.309841	4.20353	0.209149	1.39648	1.52087	0.102921	0.923532	1.02551	0.168657	4.81495
IPI01025254.1	MIR1279	CPSF6 Isoform 3 of Cleavage and polyadenylation specificity factor subunit 6	3.17862	3.2288	7.47151	5.95541	1.46856	1.96987	1.61844	4.99021	1.7434	3.35497	0.658886	1.16199	4.74004	0.18258	0.790863	0.12076	0.266328	0.64202	0.0791925	0.353678
IPI00908718.1	PPT1	palmitoyl-protein thioesterase 1 isoform 2 precursor 2	1.29217	1.76675	3.4469	2.33529	0.126149	2.09348	2.06008	0.148898	0.189675	2.34697	0.45398	0.20792	0.240249	2.35332	0.292458	0.321213	0.580254	0.762674	0.156854	0.395654
IPI00221106.5	SF3B2	Splicing factor 3B subunit 2 2	1.18378	0.803907	2.10585	1.47601	2.36428	1.00194	0.909282	1.14061	1.43754	0.859101	2.22792	0.914275	1.67946	1.40952	1.8349	0.179923	0.151989	0.674136	0.94369	1.01667
IPI00783271.1	LRPPRC	Leucine-rich PPR motif-containing protein, mitochondrial mitochondrial	4.20265	6.10165	11.0211	6.56275	8.89627	3.46151	3.1416	6.94946	5.92124	3.51226	3.13747	4.31931	2.85185	5.08765	4.31452	0.0337253	0.0921265	0.624885	0.0417643	0.535846
IPI00217465.5	HIST1H1C	Histone H1.2	85.1834	62.6395	88.2791	104.221	169.777	88.4567	59.9048	70.3949	77.4611	64.6779	121.684	71.2738	119.843	59.0678	123.392	0.268495	0.179605	0.707499	0.900466	0.970908
IPI00299573.12	RPL7A	SNORD24 60S ribosomal protein L7a	16.385	11.4565	12.8002	19.4649	21.8688	19.6479	26.1239	16.7536	25.9057	17.0962	41.8687	23.1526	12.6494	26.4427	29.2751	0.114443	0.136681	1.2873	0.0971007	1.62718
IPI01009449.1	ATP1B1	cDNA FLJ51474, highly similar to Sodium/potassium-transporting ATPase subunit beta-1 to	2.28533	1.28316	0.177403	2.60106	2.51542	0.52994	0.161555	0.365362	0.395295	0.129283	0.17524	1.08561	0.29574	0.298872	1.79626	0.0221189	0.0336226	0.178444	0.104054	0.412048
IPI00293655.3	DDX1	ATP-dependent RNA helicase DDX1	2.79181	3.26889	5.85107	2.43007	4.4168	1.68611	0.875513	7.47358	0.422435	0.156355	0.692075	1.00542	3.66903	1.95545	2.68757	0.356045	0.321462	0.565819	0.0681052	0.533597
IPI01014380.1	VPS37B	Uncharacterized protein	0.344052	0.169083	0.271119	0.762971	0.662917	0.150069	0.4341	0.227021	0.864657	0.409348	0.211701	0.0912963	0.208324	0.1886	0.146655	0.138941	0.886323	0.943467	0.0760612	0.383041
IPI00419979.3	PAK2	Serine/threonine-protein kinase PAK 2	0.129803	0.178191	0.223849	0.348879	0.272381	0.311866	0.659617	0.175909	0.335016	0.543895	0.100481	0.224845	0.185656	0.260598	0.130056	0.0399563	0.11901	1.75726	0.326968	0.78192
IPI00003949.1	UBE2N	Ubiquitin-conjugating enzyme E2 N	12.1224	6.42279	9.99011	9.47352	10.5254	4.16697	6.04105	9.24261	13.6488	6.57185	8.6542	7.89096	8.23347	6.37798	7.59684	0.417181	0.382606	0.817389	0.106971	0.798478
IPI01010778.1	GOLPH3	cDNA FLJ55806, highly similar to Golgi phosphoprotein 3 to	1.59405	1.9476	1.9763	0.600943	1.71095	1.5066	0.274276	2.33513	0.239999	0.387885	0.488862	1.39745	0.173969	0.162758	0.393299	0.0977453	0.249467	0.605872	0.015447	0.33415
IPI01013799.1	FKBP10	Uncharacterized protein	1.78769	1.63331	0.748617	2.41245	0.378326	0.210282	2.59656	1.83744	4.38872	3.47088	3.81901	1.46896	2.76696	2.28786	3.81055	0.177205	0.216818	1.79643	0.0399504	2.03341
IPI00967340.1	LRBA	Uncharacterized protein	0.132715	1.89803	1.744	0.416388	3.08079	0.362939	0.175653	0.554823	0.450001	0.415437	0.241668	0.356358	0.850628	0.295228	0.389582	0.0594308	0.118511	0.269372	0.128094	0.293384
IPI01009486.1	LBP	Uncharacterized protein	0.176703	0.221028	0.182024	0.259283	0.254652	0.618866	0.488016	0.276279	1.57964	0.49634	0.793114	1.89251	0.355544	0.13048	0.240999	0.284047	0.107317	3.16282	0.224199	3.1203
IPI00411937.4	NOP56	Nucleolar protein 56	6.15432	3.42404	4.54317	4.06682	5.81992	8.06458	4.23511	6.04357	4.34573	5.87586	5.00996	6.65897	6.23937	4.81989	6.20917	0.390766	0.327224	1.18979	0.163073	1.20531
IPI01015047.1	NUP153	NUP153 variant protein (Fragment)	0.865737	0.883131	0.358961	0.321435	0.265319	0.131015	0.253244	0.241417	0.915924	0.295432	0.195183	0.191339	0.485183	0.288551	0.186468	0.299329	0.407739	0.68175	0.126912	0.499789
IPI00333619.4	ALDH3A2	Isoform 1 of Fatty aldehyde dehydrogenase aldehyde	1.94963	0.876241	4.1742	2.12388	2.05025	0.156052	2.20183	1.52214	0.79924	1.88074	0.160273	0.930772	2.19193	0.219288	0.26624	0.0921717	0.198932	0.587066	0.0583011	0.33725
IPI00013296.3	RPS18	40S ribosomal protein S18	12.0512	10.5444	9.95692	14.1272	13.3957	10.9769	11.4058	8.32125	11.7281	9.56059	14.447	8.6656	9.42113	10.2333	7.72374	0.300986	0.154319	0.865459	0.216099	0.840458
IPI00827773.1	LOC440786	Cold agglutinin FS-1 L-chain (Fragment) (Fragment)	0.738106	1.04514	1.34239	0.173235	0.634503	0.372678	3.69174	1.90224	0.839091	2.35006	0.124128	0.517095	0.354216	1.65772	0.263413	0.0914171	0.152739	2.32772	0.567166	0.741494
IPI00395676.1	UGP2	Isoform 2 of UTP--glucose-1-phosphate uridylyltransf uridylyltransf	10.6059	3.63335	3.84878	4.49649	4.62547	5.96739	2.42654	4.36173	1.01981	4.15026	6.86091	3.75106	2.46519	3.0887	1.73544	0.371588	0.272819	0.658791	0.276025	0.657894
IPI00298971.1	VTN	Vitronectin	7.52765	6.64054	6.95331	7.23253	1.59726	16.229	13.6167	14.2373	30.144	12.4597	20.3323	11.7688	4.77831	8.77318	0.783226	0.0355702	0.0221435	2.89425	0.391032	1.55038
IPI00291328.3	NDUFV2	NADH dehydrogenase [ubiquinone] flavoprotein 2, mitochondrial 2,	1.06194	1.49796	1.46988	1.51635	1.83236	1.28654	1.83528	1.54403	2.51769	1.84472	0.43888	0.261594	1.89658	1.00452	1.211	0.0526294	0.213844	1.22359	0.161694	0.652244
IPI00291093.3	POLR2E	DNA-directed RNA polymerases I, II, and III subunit RPABC1 II,	0.136068	0.845865	0.214359	0.371697	0.478901	0.373143	0.203007	0.27382	0.296109	0.186468	0.204589	0.214671	0.287892	0.209933	0.184296	0.219955	0.322395	0.65101	0.20407	0.538075
IPI00101782.3	GMPPA	Isoform 1 of Mannose-1-phosphate guanyltransferase alpha	1.13069	0.759173	0.166535	0.651122	0.711137	0.979149	1.06326	0.908023	0.754608	0.914148	0.405929	0.427768	0.632352	0.329443	0.26163	0.012092	0.20056	1.35117	0.159293	0.601734
IPI01014872.1	UBXN4	Uncharacterized protein	0.303401	0.287075	0.120074	0.371337	0.223942	0.198512	0.257617	0.290458	0.94037	0.146006	0.588576	0.556171	0.225297	0.374672	0.234295	0.607036	0.519857	1.40368	0.174562	1.51552
IPI00103467.5	ALDH1B1	Aldehyde dehydrogenase X, mitochondrial	0.219562	0.12159	0.345319	0.3169	0.32457	0.130092	0.297776	0.217351	0.0619093	0.12992	0.305681	0.322261	0.437089	0.325268	0.262156	0.0305448	0.132563	0.630336	0.243453	1.24437
IPI00021831.1	PRKAR1A	cAMP-dependent protein kinase t	1.95966	2.0209	4.24187	4.42139	6.02433	0.555978	0.140954	0.190347	6.35283	1.68448	2.11462	2.54753	2.44765	1.67075	1.40522	0.231418	0.209475	0.478065	0.093865	0.545624
IPI01010797.1	CAPN2	cDNA, FLJ96158, highly similar to Homo sapiens calpain 2, (m/II) large subunit (CAPN2), mRNA to	0.358688	1.84817	0.280583	0.658749	0.362763	1.50838	2.1667	1.50025	3.77532	0.282339	4.22631	2.28644	4.4993	3.03774	2.11023	0.00805615	0.124709	2.63126	0.0035547	4.60536
IPI00515061.3	HIST1H2BJ	Histone H2B type 1-J	0.206613	0.158483	0.625465	4.02838	0.373764	0.675862	0.176997	5.12162	0.278355	0.448724	3.7607	2.85482	3.21006	0.913515	0.300763	0.591185	0.833731	1.24271	0.293466	2.04718
IPI00179700.3	HMGA1	Isoform HMG-I of High mobility group protein HMG-I/HMG-Y mobility	0.685296	0.18894	0.459934	0.515699	1.72082	2.37578	1.47121	1.84191	0.202164	0.186339	0.178019	2.89467	2.81474	0.543593	1.79639	0.357027	0.364068	1.70202	0.187026	2.30415
IPI00007019.1	PPIL1	Peptidyl-prolyl cis-trans isomerase-like 1	0.135212	0.135091	0.149612	0.230542	0.515306	0.457137	0.19187	0.314384	0.273157	0.40949	0.457772	0.330701	0.583539	0.523006	0.290015	0.0920561	0.305855	1.41198	0.0590156	1.87434
IPI00027851.2	HEXA	cDNA FLJ53927, highly similar to Beta-hexosaminidase alpha chain to	2.41028	0.513274	1.67644	0.143996	1.06452	0.35916	0.231246	1.3084	0.387079	0.761439	0.405254	0.405002	0.31701	0.149851	0.18978	0.0992777	0.267796	0.524631	0.0987176	0.252543
IPI00790281.2	SART3	cDNA FLJ51777, highly similar to Squamous cell carcinoma antigen recognized byT-cells 3 to	0.257135	0.220339	0.420536	0.608952	0.691452	0.224658	0.287752	0.484847	0.621316	0.452691	0.291527	0.16269	0.345079	0.211305	0.107865	0.108943	0.834147	0.942163	0.0830511	0.508761
IPI00075248.11	CALM1	CALM3;CALM2;CALM1 Calmodulin	33.7169	45.617	49.4363	73.4963	52.4438	63.7432	48.8572	46.5884	67.2191	70.5122	27.8769	25.5757	49.4912	66.9402	14.847	0.123108	0.330801	1.16572	0.258317	0.725259
IPI00027681.1	NNMT	Nicotinamide N-methyltransferase	0.127945	0.160095	0.173559	0.129229	0.436938	1.45407	1.19856	0.136578	0.944027	0.140623	2.64139	0.806139	0.277412	0.422025	0.702417	0.205129	0.104223	3.7692	0.149321	4.71838
IPI00022488.1	HPX	Hemopexin	22.9004	24.4727	31.5967	70.978	23.5769	56.7363	67.7947	25.6076	73.5473	48.2514	72.0537	50.2586	18.6332	39.6404	18.3245	0.331659	0.153513	1.56714	0.720593	1.14629
IPI00032903.3	PTRH2	Peptidyl-tRNA hydrolase 2, mitochondrial	0.365742	0.209439	0.147808	0.317318	0.207229	0.471523	0.571252	0.212068	0.669567	0.308833	0.277354	0.140253	0.342221	0.277258	0.280311	0.0543904	0.0796086	1.79012	0.794845	1.056
IPI00472753.1	HLA-B	HLA class I histocompatibility antigen, B-81 alpha chain	0.363241	0.124283	0.406267	0.5407	0.141258	0.622653	1.21319	0.962194	0.43404	0.43416	0.517202	0.389555	0.590292	0.168183	0.156031	0.0432156	0.0524934	2.32666	0.691774	1.15581
IPI00477495.3	H2BFS	Histone H2B type F-S	660.86	566.723	620.591	759.076	549.738	764.673	412.4	561.367	647.618	463.781	867.729	658.756	618.273	180.531	530.975	0.817302	0.433343	0.902708	0.633469	0.904743
IPI00009896.1	EPHX1	Epoxide hydrolase 1	5.49835	1.79826	4.74859	6.09531	5.61077	8.67702	7.65923	10.4143	9.36059	7.11123	1.64947	4.78593	10.816	1.95179	2.12255	0.0370787	0.004403	1.81979	0.807195	0.897879
IPI00028083.1	EIF2B2	Translation initiation factor eIF-2B subunit beta subunit	0.371337	1.78114	0.325448	0.300784	0.350649	0.592752	1.52944	0.375192	0.765408	0.336832	0.0991392	0.305448	0.285507	0.321948	0.218605	0.277725	0.801681	1.15027	0.260704	0.393259
IPI00878690.1	PAM	Isoform 2 of Peptidyl-glycine alpha-amidating monooxygenase alpha-amidating	0.25059	0.321435	0.464001	0.659983	1.09992	0.421762	0.115655	0.150601	0.34842	0.248376	0.697517	0.185398	0.586946	0.417776	0.270875	0.186106	0.121094	0.45953	0.501621	0.772019
IPI00554788.5	KRT18	Keratin, type I cytoskeletal 18 18	54.0267	43.4866	54.1879	95.8496	91.1329	40.7153	51.0522	75.9512	54.6065	42.6626	71.7994	61.91	39.3639	18.6978	60.3257	0.374196	0.27734	0.782405	0.262153	0.744343
IPI00939886.1	MYO1F	Myosin-ID (Fragment)	0.446119	0.163935	0.215655	0.239666	0.187856	0.338705	0.0890031	0.380957	0.120166	0.351574	0.245824	0.217005	1.47458	0.350382	0.533774	0.2465	0.947771	1.02168	0.255108	2.25143
IPI01009966.1	BCAT2	Isoform B of Branched-chain-amino-acid aminotransferase, mitochondrial aminotransferase,	0.229983	0.927102	1.28343	1.83515	0.410285	0.235125	0.403433	0.462973	0.399841	0.435517	1.1743	2.73587	0.930708	0.185965	1.86103	0.107816	0.132842	0.41334	0.42644	1.4699
IPI00384643.2	TP53I3	Isoform 1 of Quinone oxidoreductase PIG3 oxidoreductase	1.54296	1.13006	1.37726	1.79589	3.8785	0.861606	1.06807	1.43764	1.59107	0.709119	2.25433	1.98646	0.593245	0.426406	0.721114	0.271433	0.18259	0.582796	0.268015	0.615091
IPI00001159.11	GCN1L1	Translational activator GCN1	1.18863	0.485957	3.11148	1.00619	0.984116	0.831392	0.693323	0.296458	0.911554	0.289272	0.282966	0.219806	1.7719	1.24824	0.804018	0.282855	0.177391	0.445961	0.395993	0.638533
IPI00008167.1	ATP1B3	Sodium/potassium-transporting ATPase subunit beta-3	1.00118	1.63003	1.00947	2.92858	1.75771	1.84267	2.29612	3.47641	2.74518	1.91295	1.67272	4.5438	0.193983	2.14518	2.89588	0.508631	0.127943	1.47393	0.4639	1.37524
IPI01009243.2	RAB6A	Uncharacterized protein	1.55995	1.44533	1.26007	1.51037	1.85433	0.832141	1.32125	1.14854	0.256957	0.264676	1.18698	0.372652	0.26212	0.168194	1.05358	0.00956488	0.0219322	0.501119	0.00887528	0.398887
IPI00186290.6	EEF2	Elongation factor 2	134.14	109.531	82.5731	106.617	111.207	98.1829	81.2333	72.4644	107.904	88.7577	133.593	79.3743	83.5055	96.1757	97.0866	0.284662	0.102865	0.824421	0.413692	0.900134
IPI01015489.1	SEC24C	cDNA FLJ60345, highly similar to Protein transport protein Sec24C to	0.733312	0.958068	0.532259	0.483002	0.605291	0.33555	0.315935	0.50934	0.601276	0.666834	0.464291	0.330862	0.426672	0.994608	1.5579	0.451062	0.14913	0.733389	0.723162	1.13962
IPI00023560.1	PDLIM7	Isoform 2 of PDZ and LIM domain protein 7 and	0.241099	0.447978	0.244228	0.174742	0.26685	0.591767	0.393027	0.241518	0.52679	0.281909	0.418065	0.130344	0.160506	0.255342	0.259949	0.130903	0.150393	1.48012	0.669819	0.890398
IPI00218924.5	CHP	Calcium-binding protein p22	0.511356	0.0746662	0.306572	0.555323	0.293514	0.322305	0.198884	0.267201	0.662044	0.473619	1.09642	2.85106	0.147491	0.451313	0.8682	0.156562	0.767891	1.10487	0.195756	3.10922
IPI00790627.2	PCBP2	poly(rC)-binding protein 2 isoform e e	14.0199	22.3051	8.72951	7.15524	25.0164	5.59485	10.7465	10.3826	12.3129	5.03747	16.6506	4.78958	4.5215	12.6092	9.20042	0.184277	0.142781	0.570719	0.209635	0.61859
IPI00299024.9	BASP1	Isoform 1 of Brain acid soluble protein 1 acid	24.6942	20.1485	20.6662	29.7393	23.8944	38.8462	33.8011	31.5354	40.7605	32.4445	17.5902	19.1916	32.312	38.3273	20.9881	0.0247325	0.00168152	1.48887	0.691958	1.07778
IPI01022932.1	C4B	Uncharacterized protein	0.119601	0.158055	0.215029	0.267739	0.223601	0.330701	0.224424	0.1863	0.784258	0.446119	0.275266	0.401731	0.258404	2.50116	0.319503	0.34634	0.140943	2.00381	0.274751	3.81705
IPI00384369.5	TPM1	Tropomyosin 1 alpha variant 6 6	0.863579	0.570066	0.938742	0.350601	1.04268	1.56721	0.918849	0.781328	2.03482	1.54339	1.2223	0.626984	1.90514	1.41922	0.643316	0.142597	0.0562534	1.8179	0.18473	1.54474
IPI00645329.1	RBBP4	Isoform 3 of Histone-binding protein RBBP4 protein	4.51586	8.85627	5.32396	5.58207	6.76974	3.66065	5.45243	6.70065	7.2793	3.40416	11.6157	8.93148	5.33246	5.24994	6.56138	0.277237	0.425991	0.853429	0.385698	1.21396
IPI00003881.5	HNRNPF	Heterogeneous nuclear ribonucleoprotein F	22.1587	33.0688	27.5198	28.4292	33.8316	39.3475	16.6114	35.5136	21.4663	31.3719	5.2678	15.3174	19.4689	21.9553	21.4901	0.0322	0.977628	0.99519	0.0131639	0.575827
IPI00159358.7	TMEM201	Isoform SAMP1 of Transmembrane protein 201 protein	0.282966	0.381036	0.256299	0.253965	0.918213	0.166143	0.43161	0.148692	0.27561	0.18152	0.688964	0.467779	0.319458	0.225688	0.173463	0.419384	0.249211	0.575191	0.790359	0.896235
IPI00936444.2	MUC5B	cDNA FLJ59081, highly similar to Mucin-5B to	0.549846	0.313492	0.528766	0.223911	0.606425	0.292073	0.272986	0.301264	1.57037	0.397107	0.510718	0.314711	0.737492	1.03893	0.264438	0.840298	0.662227	1.27508	0.455012	1.2897
IPI00026230.1	HNRNPH2	Heterogeneous nuclear ribonucleoprotein H2	5.59098	3.91578	5.33209	5.32359	1.91707	3.00695	1.98922	3.4781	0.383368	1.55682	0.335853	0.355421	6.29628	0.104097	1.68693	0.0909311	0.0306487	0.47168	0.09415	0.39759
IPI00910902.1	NQO1	cDNA FLJ50573, highly similar to Homo sapiens NAD(P)H dehydrogenase, quinone 1 (NQO1), transcript variant 3, mRNA to	0.549237	0.157181	1.59826	0.404469	0.207014	0.515163	0.870671	0.38915	0.553325	0.347287	0.473029	0.593533	0.201214	0.333856	0.90985	0.947919	0.869876	0.917507	0.790077	0.86123
IPI00793277.1	CRTAP	Uncharacterized protein	0.161376	0.210064	0.186029	0.146889	0.161948	0.376207	0.295228	0.459552	0.225876	0.316681	0.399648	0.439764	0.19073	0.232467	0.33254	0.0153103	0.0126793	1.93182	0.0355545	1.84132
IPI00396378.3	HNRNPA2B1	Isoform B1 of Heterogeneous nuclear ribonucleoproteins A2/B1 nuclear	125.88	101.097	97.4912	109.638	93.8705	83.5229	93.4161	103.911	84.3257	87.9127	136.004	94.6218	111.972	90.8617	124.681	0.0936371	0.0648625	0.85816	0.577869	1.05713
IPI00760909.3	CAST	Uncharacterized protein	1.03333	0.18234	2.09522	3.30741	0.253824	4.19276	2.55142	0.220798	2.84356	3.23328	0.540625	1.89803	2.52275	0.275228	0.162319	0.184865	0.20169	1.89779	0.709174	0.785632
IPI00983028.1	PROSC	Uncharacterized protein	0.169247	0.205427	0.258888	0.278742	0.329991	0.330885	0.140428	0.892114	1.58315	0.51792	0.33201	0.338822	0.389123	0.705051	0.133693	0.164448	0.156366	2.78879	0.234824	1.52838
IPI00745396.1	HNRPLL	Uncharacterized protein	0.10477	0.0649512	0.181093	0.424636	0.364225	0.149768	0.195956	0.289975	0.296396	0.200893	0.664297	0.283614	0.158912	0.244245	0.166385	0.679632	0.986726	0.994133	0.538595	1.33148
IPI01013112.1	ARHGDIB	Uncharacterized protein	0.141768	0.302457	0.240682	0.161589	0.374205	1.18575	2.75166	0.21797	0.317362	0.384059	3.02074	0.16495	3.31682	7.06456	0.26272	0.102419	0.202618	3.9787	0.116441	11.3294
IPI00184821.1	COASY	Isoform 1 of Bifunctional coenzyme A synthase coenzyme	0.733414	2.62242	0.807873	0.977928	0.98514	0.327576	0.311845	0.694526	1.29092	1.2598	0.346782	0.20677	0.959996	0.49955	0.119228	0.123698	0.315464	0.634048	0.0872144	0.348034
IPI00022597.1	UBE2M	NEDD8-conjugating enzyme Ubc12	0.319857	0.526644	0.668037	0.25621	0.817732	0.269284	0.677409	0.367292	0.478404	0.208975	0.103902	0.276835	0.400563	0.181684	0.171716	0.0808388	0.407006	0.773181	0.048527	0.438365
IPI00016112.6	PXDN	Isoform 1 of Peroxidasin homolog homolog	1.79901	1.91893	0.125078	0.873755	0.398486	0.945599	0.309197	1.87696	1.58502	1.0503	0.553095	1.74485	0.330839	0.368337	3.38604	0.916692	0.781274	1.12743	0.72483	1.24787
IPI00827610.1	ACOX3	Isoform 2 of Peroxisomal acyl-coenzyme A oxidase 3 acyl-coenzyme	0.202024	0.752832	0.207646	0.782466	0.264438	0.381195	0.336668	0.506488	0.402511	0.436272	0.338587	0.470478	0.169999	0.198774	0.0872198	0.299775	0.83998	0.933796	0.254541	0.572578
IPI00414684.7	SEMG1	Isoform 2 of Semenogelin-1	0.250416	0.34671	0.106801	0.381089	0.965468	4.38264	0.359858	0.457581	0.472439	0.415984	0.197524	0.519538	0.211818	0.268501	0.310981	0.34808	0.369089	2.9693	0.521462	0.735613
IPI00219713.1	FGG	Isoform Gamma-A of Fibrinogen gamma chain gamma	134.793	54.8493	47.3962	199.052	26.3202	74.3263	67.7618	118.373	411.03	131.343	205.23	85.03	89.5549	65.2316	99.6778	0.534328	0.378459	1.7362	0.697424	1.17801
IPI00001639.2	KPNB1	Importin subunit beta-1	15.3015	13.1574	16.9006	18.9838	16.0422	20.5234	15.0919	19.5853	29.0366	22.8038	12.0403	10.581	21.4901	23.7639	12.9188	0.165814	0.0800275	1.3316	0.978278	1.00508
IPI00218236.6	PPP1CB	Serine/threonine-prote	13.1155	9.47155	9.30303	15.275	8.51083	9.80284	7.30457	9.01108	11.7697	8.45321	16.0389	8.17263	12.9735	13.9607	10.9899	0.196842	0.258124	0.832342	0.509187	1.11602
IPI00156374.6	IPO4	Isoform 1 of Importin-4	0.188247	0.578104	0.547754	0.328622	0.541225	0.247895	0.144126	0.531227	0.159375	0.278761	0.263724	0.221565	0.0933763	0.287693	0.205727	0.0683889	0.150333	0.623358	0.0406245	0.490892
IPI00019380.1	NCBP1	Nuclear cap-binding protein subunit 1 1	0.440252	0.16004	0.248686	0.191127	0.377985	0.255926	0.163833	0.292498	0.256495	0.234799	0.801125	0.259409	0.1968	0.332609	0.677362	0.161682	0.492323	0.848714	0.248705	1.59885
IPI00015361.1	PFDN5	Prefoldin subunit 5	0.667713	0.423109	0.556788	0.440068	0.64403	0.399786	0.145794	0.357422	0.64649	0.252841	0.117018	0.620456	0.454641	0.116815	0.633581	0.304156	0.102411	0.659782	0.260546	0.711097
IPI00885106.1	TM9SF4	Similar to Transmembrane 9 superfamily member 4 precursor superfamily	0.73785	0.786762	0.235794	1.48452	0.196486	1.4756	0.445038	0.296129	2.14384	0.282691	0.210282	0.267276	0.233711	0.3989	0.783877	0.364358	0.60476	1.34924	0.276727	0.550368
IPI00303954.3	CYB5B	cytochrome b5 type B precursor precursor	2.39164	2.39728	3.63108	3.27637	2.12035	2.438	3.61451	2.74176	5.0051	3.21028	7.07681	5.41515	3.43569	3.37012	4.29572	0.0504255	0.271976	1.23109	0.0456554	1.7076
IPI01015062.1	KIAA0368	cDNA FLJ45314 fis, clone BRHIP3005142, highly similar to Proteasome-associated protein ECM29 homolog BRHIP3005142,	0.575385	0.169929	0.250208	0.31347	0.218711	0.26735	0.256672	0.277816	0.468526	0.333417	0.396337	0.232838	0.105961	0.12424	0.311953	0.534182	0.857754	1.0498	0.453634	0.766725
IPI00550069.3	RNH1 Ribonuclease inhibitor	Placental ribonuclease inhibitor	12.318	11.9373	11.8236	19.764	19.9858	19.2195	18.5417	18.5507	22.2002	22.9799	26.5437	14.0374	21.7735	27.3942	11.9364	0.205132	0.0550725	1.33844	0.208078	1.34099
IPI00645589.1	SLC44A2	Isoform 3 of Choline transporter-like protein 2 transporter-like	0.253912	0.21341	0.237714	0.298458	0.448289	0.327167	0.166651	0.152101	0.313818	0.499169	0.111244	0.36216	0.204603	0.291547	0.577463	0.972334	0.985536	1.00491	0.838449	1.0656
IPI00333771.1	CALD1	Isoform 5 of Caldesmon	10.138	5.68989	8.96498	10.8318	7.43019	9.1966	11.0886	5.97484	10.0331	19.2916	16.8444	0.354633	14.725	13.488	9.2017	0.674192	0.341597	1.29102	0.486208	1.26847
IPI00004657.1	HLA-B	LOC441528 HLA class I histocompatibility antigen, B-7 alpha chain	0.265963	0.128212	0.18186	0.304898	0.272249	0.98719	0.483705	0.180291	0.247243	0.453571	0.426702	0.386088	0.204263	0.588372	5.67925	0.360392	0.167632	2.03957	0.310733	6.31702
IPI00983316.1	RPL30	Uncharacterized protein	8.00555	3.44738	3.17972	3.5566	10.2617	2.06694	3.23934	5.44337	15.8488	5.37849	4.79689	10.2361	1.3229	12.2109	8.23918	0.839434	0.812031	1.12393	0.512006	1.29367
IPI00017526.1	S100P	Protein S100-P	0.754765	0.257225	0.0536566	1.6881	0.18459	0.346782	2.276	0.201186	1.63864	1.53975	2.69989	2.07398	1.14361	0.691691	0.585199	0.287667	0.257255	2.04278	0.135908	2.44845
IPI01011169.1	PTGS1	56 kDa protein	2.34697	1.63807	1.64239	0.277739	0.292255	0.42552	0.618052	0.382545	3.35846	0.365286	0.201772	0.385793	0.133916	0.365033	0.46323	0.28648	0.777406	0.830967	0.0857899	0.250062
IPI01009564.1	AKT1	cDNA FLJ53606, highly similar to RAC-alpha serine/threonine-protein kinase to	0.175009	0.167276	0.30296	0.474638	0.331596	0.456251	0.459584	0.524277	0.728045	0.359061	0.453948	0.549846	0.284796	0.36559	0.26409	0.0617547	0.0332947	1.74113	0.26491	1.3216
IPI00305833.3	SMU1	WD40 repeat-containing protein SMU1	0.218848	0.0905087	0.29076	0.627027	0.0958352	0.414602	0.300471	0.327462	0.384166	0.768171	0.346325	0.184834	0.271439	0.244245	0.459711	0.300875	0.216473	1.65904	0.748233	1.13876
IPI00004902.1	ETFB	Isoform 1 of Electron transfer flavoprotein subunit beta transfer	0.777546	0.172157	0.91955	0.914212	1.2605	0.26232	0.265521	0.158956	0.466355	0.129381	0.219197	1.40406	0.247843	0.143001	1.37278	0.167027	0.0331187	0.317147	0.711999	0.837513
IPI00006114.5	SERPINF1	Pigment epithelium-derived factor	2.84455	2.36248	1.67551	4.73807	1.52066	10.341	4.3319	3.37363	6.24067	8.58668	14.0393	6.80314	2.49978	3.16345	4.96743	0.142755	0.0348902	2.50157	0.154493	2.39498
IPI01010768.1	DIABLO	Uncharacterized protein	1.25919	3.07162	0.555092	0.291426	0.403069	1.61049	1.34742	0.730927	0.975153	0.428569	0.33344	0.543669	0.517991	0.936337	0.12913	0.388278	0.867806	0.912579	0.300459	0.44093
IPI00420108.6	DLST	Dihydrolipoyllysine-residue succinyltransferase component of 2-oxoglutarate dehydrogenase complex, mitochondr	0.865917	6.55638	4.10647	9.49258	5.24412	8.08305	7.23754	7.84188	10.8048	8.14492	5.64002	4.37717	4.09056	7.6285	3.59128	0.057438	0.0909866	1.60333	0.910114	0.964291
IPI00654820.2	ATP6	ATP synthase subunit a	1.08237	0.827998	0.503792	1.19011	2.2839	1.0814	0.923959	1.33644	1.82197	1.60648	2.05965	2.21699	1.39939	0.9531	1.91017	0.315621	0.624742	1.1498	0.203373	1.45024
IPI00218144.3	COX17	Cytochrome c oxidase copper chapero chapero	0.28185	0.154245	0.113511	0.575226	0.354486	0.357348	0.450251	0.501666	0.598573	0.236728	0.362763	0.104357	0.510117	0.0793019	0.312906	0.326813	0.23455	1.4497	0.853851	0.925727
IPI00031420.3	UGDH	UDP-glucose 6-dehydrogenase	19.7831	17.5391	16.2189	20.8171	25.4272	29.194	21.1957	24.5236	21.0946	28.1605	21.0858	19.4865	21.077	18.7186	12.4597	0.0440617	0.0691338	1.24435	0.553606	0.930273
IPI00783250.1	TRIP12	Uncharacterized protein	0.228727	0.239633	0.143369	0.244448	0.0968167	0.324952	0.312862	0.154107	0.182656	0.226393	0.380904	0.393681	0.196214	0.275266	0.31778	0.0692684	0.30668	1.26021	0.0323364	1.64098
IPI00031982.1	NCKAP1	Isoform 1 of Nck-associated protein 1 protein	0.136701	0.251268	0.214062	0.227778	0.479499	0.934716	0.201646	0.275419	0.336598	0.464741	0.167705	0.211173	0.261539	0.254899	0.160896	0.160709	0.255771	1.6903	0.447065	0.806696
IPI00791490.1	PDXK	Uncharacterized protein	0.229792	0.610939	0.261431	2.20901	1.68214	2.34632	0.155825	0.391776	1.27872	0.542953	0.362587	0.298686	0.281284	0.16865	0.172791	0.2425	0.924095	0.944382	0.138094	0.257143
IPI00927191.2	GLB1	Isoform 3 of Beta-galactosidase	0.22811	0.349049	1.79104	0.128648	0.183303	0.364856	0.443191	0.114166	0.540925	0.888227	0.651709	1.3991	0.443252	0.742313	1.18978	0.391532	0.853959	0.877325	0.370464	1.65146
IPI00219484.1	SNRNP70	Isoform 3 of U1 small nuclear ribonucleoprotein 70 kDa small	2.26341	1.64	0.469957	0.56	0.283594	1.05482	1.44533	1.67203	2.94547	2.03115	0.493116	0.322663	1.19764	1.62057	1.6689	0.202373	0.157235	1.75366	0.972234	1.01647
IPI00793199.1	ANXA4	annexin A4	55.1313	59.4416	68.6458	77.5309	64.1421	102.53	74.1924	52.7573	150.425	85.3193	113.473	71.4866	81.5549	108.406	88.2485	0.151172	0.165214	1.43193	0.0216133	1.42561
IPI00456969.1	DYNC1H1	Cytoplasmic dynein 1 heavy chain 1 chain	20.8894	19.3304	22.7785	20.3605	23.9873	18.2333	12.6854	21.1399	24.1157	20.5092	29.0809	25.1415	20.8157	17.2079	20.4015	0.425262	0.349706	0.900671	0.653863	1.04939
IPI00217474.7	IFI16	Interferon, gamma-inducible protein 16, isoform isoform	2.77714	1.43167	4.92185	3.84238	3.38745	1.40503	4.76277	4.92663	2.48234	5.29819	1.87488	2.0181	5.53315	9.97627	3.68407	0.655331	0.617263	1.15369	0.438453	1.41111
IPI00465436.4	CAT	Catalase	10.4339	7.14681	6.96972	9.91629	8.04337	7.40654	7.215	8.90737	6.35592	14.9575	22.4089	11.9397	15.8972	7.60316	7.02209	0.234773	0.794535	1.05487	0.195279	1.52602
IPI00940222.2	AKAP12	Isoform 3 of A-kinase anchor protein 12 anchor	0.375166	0.041055	0.148754	0.252193	0.289092	0.495446	1.2201	0.551182	0.396942	0.332701	0.236629	0.271401	0.158802	0.875209	0.144246	0.135943	0.076341	2.70856	0.46706	1.52431
IPI00376165.2	TMSB4XP2	Similar to Thymosin beta-4	27.4227	19.9125	15.0261	23.3088	13.5639	12.4175	15.8763	10.2859	13.7972	15.8631	50.6433	0.180166	7.52348	9.0832	0.206112	0.676894	0.072979	0.687667	0.5499	0.681584
IPI00878127.1	STAT5B	Uncharacterized protein	0.11229	0.137462	0.289212	0.193271	0.249481	0.284027	0.418906	0.458502	0.231679	0.567031	0.348179	0.836768	0.359684	0.341226	0.25905	0.0859612	0.0285996	1.99665	0.0873799	2.18485
IPI00022371.1	HRG	Histidine-rich glycoprotein	14.9327	7.2516	7.66083	5.03259	1.90053	6.53596	7.19752	9.94244	4.26546	4.20877	4.35508	3.04048	2.87587	4.3796	1.69949	0.143892	0.713431	0.874163	0.131225	0.444571
IPI00011770.1	NDUFA4	NADH dehydrogenase [ubiquinone] 1 alpha subcomplex subunit 4 alpha	2.72489	3.39074	3.65355	3.25622	4.75848	2.39845	3.44834	3.17356	4.62675	2.78987	7.79311	5.05882	4.2357	3.09449	3.39403	0.209306	0.609575	0.924262	0.255199	1.3257
IPI00022446.1	PF4	Platelet factor 4	0.179083	0.0661324	0.386677	0.302289	0.398651	0.308363	0.142576	0.294574	0.453539	0.270013	0.31137	0.2571	0.295904	0.10391	0.115063	0.596266	0.744738	1.10221	0.540975	0.812815
IPI00017297.1	MAT	Isoform 1 of Eukaryotic initiation factor 4A-II	17.2653	17.6073	20.1136	22.4587	22.7532	16.2065	10.3081	13.6393	20.6705	16.3555	15.5949	11.2746	21.4693	15.5851	19.0973	0.136589	0.0607305	0.770273	0.144063	0.828571
IPI00013917.3	RPS12	40S ribosomal protein S12	11.777	15.3514	15.9203	19.6111	23.3832	11.5394	17.0666	16.9839	19.2089	18.8149	4.1233	19.9263	3.45001	18.2674	8.21409	0.162564	0.845833	0.971765	0.159023	0.627373
IPI00215911.3	APEX1	DNA-(apurinic or apy	23.3039	20.4184	18.7485	27.2654	23.2394	26.5217	27.2654	23.5769	33.759	24.0956	12.6459	27.2107	33.4283	21.0595	17.0429	0.356598	0.0941741	1.19688	0.93895	0.985942
IPI00328328.3	MIR1248	ATP-dependent RNA helicase eIF4A-2	2.69951	0.385847	1.24842	3.8267	1.49071	1.99474	3.49793	1.49589	3.65507	1.96932	2.04486	1.90356	2.9003	1.76565	1.35792	0.612088	0.451602	1.30688	0.925183	1.03327
IPI00940432.2	IMMT	Uncharacterized protein	2.8204	3.79763	3.02933	2.76274	6.31595	4.7532	3.61326	5.87953	6.62399	6.64238	7.07681	5.69068	5.16332	4.40182	4.89395	0.0880568	0.0838646	1.4692	0.073718	1.45394
IPI01015739.1	ZW10	ZW10 protein	0.180904	0.110086	0.156789	0.461084	0.877578	0.380535	0.566285	0.478503	1.13202	1.0064	0.29078	0.462171	0.37036	0.297158	0.0907788	0.0781178	0.125395	1.99488	0.738155	0.845954
IPI00147874.1	NANS	Sialic acid synthase	2.22068	5.65685	0.148188	3.06227	2.31643	4.82189	5.65568	4.75617	3.03038	6.07928	2.67307	2.54859	1.09384	2.88806	4.23952	0.058346	0.0745519	1.81607	0.994179	1.00288
IPI00219298.2	DAB2	Isoform 2 of Disabled homolog 2 homolog	0.921273	0.136503	0.265062	0.468883	0.226958	0.668871	0.699453	0.413971	0.955151	0.366682	0.532923	0.260219	0.593245	0.478503	0.893166	0.436744	0.25556	1.5377	0.421424	1.36627
IPI00910626.1	ELOVL1	cDNA FLJ51720, highly similar to Elongation of very long chain fatty acids protein 1 to	0.196882	0.427679	0.637457	1.72059	0.299764	0.519538	0.188012	0.29691	0.341132	2.59728	0.0966424	0.381195	0.307189	0.0371962	0.117832	0.383917	0.811608	1.20123	0.166799	0.286395
IPI00219381.5	NDUFA2	NADH dehydrogenase [ubiquinone] 1 alpha subcomplex subunit 2 alpha	0.49789	0.226408	0.906765	0.29331	0.200004	1.01291	0.197141	1.44063	0.193218	1.70067	2.29931	2.43058	1.26146	0.970365	1.00996	0.029508	0.207508	2.13924	0.0177322	3.75248
IPI00218728.4	PAFAH1B1	Isoform 1 of Platelet-activating factor acetylhydrolase IB subunit alpha factor	0.589883	0.601777	0.601235	0.237978	1.81064	1.32061	2.02933	1.12842	1.29882	0.999861	1.44824	1.64912	1.35097	1.13391	1.0654	0.0970629	0.112702	1.76416	0.108281	1.73048
IPI00945620.1	GMPS	Uncharacterized protein	0.140954	0.357843	0.283988	0.318662	0.27223	4.3301	0.369949	0.383713	0.293371	0.199575	0.261231	2.85838	0.306849	3.84158	1.95558	0.2384	0.355204	4.05969	0.0893973	6.71455
IPI00980165.2	MANF	Mesencephalic astrocyte-derived neurotrophic factor	0.147185	0.369335	0.494451	1.11597	0.211848	0.639581	2.91359	4.55358	0.864897	4.86993	0.279341	1.50608	0.641046	0.197839	0.164322	0.0175218	0.0595357	5.91826	0.776836	1.19234
IPI00883914.3	PRKAG1	Uncharacterized protein	0.272419	0.368593	0.212819	0.492194	0.379718	0.148589	0.144636	0.17728	0.42851	0.353602	0.345462	0.541938	0.209642	0.498132	0.223137	0.377816	0.249548	0.725842	0.830944	1.05364
IPI00555812.5	GC	vitamin D-binding protein isoform 1 precursor 1	2.16505	10.7242	17.7248	38.1233	0.220691	43.6618	88.4077	33.0505	63.0009	28.9	35.3074	12.8563	11.5155	24.0173	1.27235	0.0123101	0.0238142	3.72721	0.731048	1.23218
IPI00946257.1	UBAP2L	Isoform 4 of Ubiquitin-associated protein 2-like protein	0.173139	0.11714	0.140827	0.199132	0.192189	0.334111	0.385954	0.31864	0.192203	0.457899	0.164038	0.322596	0.268892	0.256033	0.330701	0.00778331	0.0135971	2.05344	0.0214155	1.63207
IPI00783862.2	BLVRB	Flavin reductase	8.17036	4.12216	5.56391	5.21367	6.71506	5.77251	7.10483	9.60776	13.5039	15.6577	18.8279	10.5385	11.5131	4.69882	3.93374	0.252075	0.0793307	1.73397	0.221357	1.66231
IPI00171152.2	ABHD11	Isoform 4 of Abhydrolase domain-containing protein 11 domain-containing	0.399897	0.13413	0.348952	0.344434	0.476154	0.337206	0.879649	0.773193	0.216344	1.08058	0.379665	0.753511	0.494383	0.458248	1.71155	0.246783	0.128561	1.92946	0.165834	2.22906
IPI00010810.1	ETFA	Electron transfer flavoprotein subunit alpha, mitochondrial alpha,	3.47666	6.51335	5.25977	6.14069	10.7398	5.10886	4.71514	7.19353	7.88603	6.87948	2.89507	1.23328	5.83042	5.96904	3.84105	0.146102	0.960579	0.989192	0.140441	0.615272
IPI00973360.1	PPP2R2B	serine/threonine-protein phosphatase 2A 55 kDa regulatory subunit B beta isoform isoform d kDa	2.23132	0.217562	0.353627	0.426583	0.665957	0.170649	0.506348	0.150475	0.408526	0.159552	0.0916132	0.383926	0.508246	0.330403	0.228537	0.242347	0.251329	0.358288	0.275791	0.396073
IPI01011421.2	DLD	Dihydrolipoyl dehydrogenase	5.24448	3.36452	7.35997	7.39218	6.22382	4.1855	6.38417	7.3758	7.12999	11.3074	2.5998	1.0344	4.45029	5.15546	5.76612	0.0650341	0.357075	1.22978	0.104342	0.642423
IPI00927883.1	GUSB	cDNA FLJ53268, highly similar to Beta-glucuronidase to	10.4064	4.59002	5.26014	4.01138	2.13435	10.3532	8.67883	13.341	6.86424	15.3642	8.163	3.5687	14.601	3.61977	8.48962	0.0962657	0.0263189	2.06806	0.358883	1.45602
IPI00514701.1	BUB3	Isoform 2 of Mitotic checkpoint protein BUB3 checkpoint	1.75418	1.3383	0.626723	2.44054	3.55439	0.470641	0.26134	0.970433	2.64873	1.44774	1.2676	1.38905	1.76076	2.16655	1.81705	0.381357	0.267345	0.596953	0.638371	0.864824
IPI01014449.1	CBX1	Uncharacterized protein	0.673057	0.597868	0.617538	0.261286	1.08651	0.848508	0.765567	0.736726	0.874603	0.856901	0.823819	0.455114	0.65189	0.21941	0.47533	0.146365	0.271201	1.26143	0.484536	0.811296
IPI00923572.1	ZNF529	zinc finger protein 529 isoform b isoform	0.249792	0.36844	0.26163	0.322797	0.229108	0.218424	0.217562	0.486732	0.456283	0.250625	0.33388	0.353504	1.00083	0.955614	0.720265	0.0200039	0.568582	1.13819	0.0524134	2.34961
IPI00216221.2	ITGA6	Isoform Alpha-6X1A of Integrin alpha-6 alpha-6	0.793004	0.700424	1.83936	1.32363	2.17257	1.7352	0.543933	1.63127	2.19634	0.396914	0.265319	1.94787	2.41697	0.181042	2.08378	0.987993	0.889931	0.952362	0.981821	1.00967
IPI00005707.7	MRC2	C-type mannose receptor 2	0.423343	0.17917	0.260454	0.368516	0.235533	0.218348	0.726734	0.14071	0.484309	0.193338	0.530969	0.148929	0.119171	0.310572	0.391857	0.856864	0.639828	1.20206	0.9404	1.02351
IPI00182533.5	RPL28	60S ribosomal protein L28	0.210399	2.28121	2.62642	3.26142	2.65903	1.98784	2.74461	2.46092	0.301766	0.166928	2.92594	3.12574	2.60268	3.84744	3.14291	0.0795411	0.397275	0.694123	0.159995	1.41729
IPI00016610.2	PCBP1	Poly(rC)-binding protein 1	25.248	22.3453	18.4507	34.2208	38.3353	16.1874	21.5542	23.1109	25.0615	19.4595	32.975	26.066	13.9298	16.2921	16.1381	0.261682	0.155411	0.76027	0.237425	0.760469
IPI01015765.1	TOMM70A	cDNA FLJ57240, highly similar to Mitochondrial proteins import receptor to	0.796695	1.62439	2.40444	1.78633	0.244567	1.28824	1.10849	2.14221	0.675862	0.316483	0.943962	0.963128	0.26049	1.05468	1.29702	0.559952	0.604545	0.806731	0.309633	0.65913
IPI00298497.3	FGB	Fibrinogen beta chain	189.559	64.7451	71.9588	311.265	31.7195	128.783	133.149	158.046	576.23	251.637	261.651	101.638	112.136	114.159	135.872	0.352338	0.283699	1.86455	0.856433	1.08399
IPI00005159.3	ACTR2	Actin-related protein 2	6.413	4.71318	5.39417	7.04842	6.6171	4.45554	4.62964	3.53253	7.24608	4.08518	10.8355	4.83327	3.28775	10.9708	6.48587	0.254959	0.150287	0.793383	0.479602	1.2063
IPI00105598.3	PSMD11	Proteasome 26S non-ATPase subunit 11 variant (Fragment) 11	1.26655	3.54823	8.13307	5.58594	6.26537	5.27437	4.84703	6.75614	5.44639	6.76364	2.59656	2.60142	2.7181	4.71285	2.11697	0.0556504	0.52184	1.17293	0.170501	0.594613
IPI00220271.3	AKR1A1	Alcohol dehydrogenase [NADP+]	12.5882	8.75617	11.6908	7.26267	20.3831	8.128	10.5341	7.25311	9.01483	8.03334	11.1193	9.74796	14.439	8.70232	6.74865	0.302473	0.197536	0.708022	0.47518	0.836462
IPI01011849.1	HMGCL	cDNA FLJ16378 fis, clone TKIDN2016399, highly similar to Hydroxymethylglutaryl-CoA lyase, mitochondrial TKIDN2016399,	0.663331	0.30018	0.168731	0.387213	1.00424	0.257974	1.12889	1.07684	0.68411	0.389988	0.308	0.323963	0.406323	0.520439	0.512882	0.326988	0.404812	1.40183	0.587599	0.820863
IPI00218918.5	ANXA1	Annexin A1	67.4011	67.2704	122.319	187.832	147.166	98.0945	70.6296	98.4077	154.944	99.2091	134.952	117.547	100.796	71.6354	80.7561	0.75182	0.619	0.880566	0.532816	0.854218
IPI00985384.1	DDX3X	ATP-dependent RNA helicase DDX3X isoform 3 isoform	7.23353	6.97117	4.9833	4.44197	4.2868	2.47924	4.2228	4.03509	0.344601	3.67999	3.59377	2.21345	7.48032	1.856	3.07141	0.094484	0.0255244	0.528776	0.148504	0.652474
IPI00550021.4	SNORD43	60S ribosomal protein L3	10.4107	8.5126	7.48862	8.00666	7.88549	10.3374	9.23556	3.34638	7.39218	9.56987	7.33044	6.84334	10.1029	10.1866	5.5098	0.920095	0.734582	0.942731	0.674919	0.944899
IPI00791534.2	SLC4A1	Solute carrier family 4, anion exchanger, member 1 anion	9.57386	2.95878	3.40345	8.42397	5.55082	4.85745	6.15731	10.0638	15.8466	17.3036	8.76285	5.01935	15.8411	3.1277	5.34504	0.28235	0.135772	1.81301	0.551457	1.27365
IPI00334400.2	PKP4	Isoform 2 of Plakophilin-4	0.312537	0.265062	0.164208	0.739079	0.32642	0.157257	0.0208863	0.0323677	0.384245	0.338634	0.282417	0.304941	0.258082	0.122563	0.251477	0.273183	0.199564	0.516454	0.30965	0.67475
IPI00014230.1	C1QBP	Complement component 1 Q subcomponent-binding protein, mitochondrial subcomponent-binding	10.4955	9.94037	11.7591	14.8121	10.7988	15.7317	17.1626	13.1492	18.4673	23.5295	4.93859	6.75802	20.5249	17.7999	4.84736	0.110395	0.0206535	1.52304	0.873838	0.949191
IPI00844578.1	DHX9	ATP-dependent RNA helicase A	14.5324	15.4346	21.4143	25.1834	18.3715	19.1384	12.5926	13.681	17.3853	10.3481	12.7994	20.2058	20.6018	14.8532	16.9099	0.233458	0.125305	0.77047	0.463353	0.899237
IPI00021187.4	RUVBL1	Isoform 1 of RuvB-like 1 1	3.85358	5.41139	7.33146	4.68776	5.59757	2.9672	1.87644	3.74898	6.22382	5.80703	2.67752	3.30145	3.24608	2.03778	4.78494	0.0946716	0.254825	0.767192	0.0196309	0.596976
IPI00026670.3	TCEB2	Transcription elongation factor B polypeptide 2 polypeptide	0.0801085	0.139496	0.21576	0.25637	0.188587	0.477873	0.162532	0.36592	0.428421	0.570738	0.170188	0.664527	0.267127	0.235125	0.16738	0.109335	0.0263856	2.27813	0.259553	1.70886
IPI00019385.4	SSR4	Translocon-associated protein subunit delta	13.7294	3.65355	8.14266	4.50804	5.38408	4.91537	5.45357	5.73224	10.4759	6.89524	9.19723	6.95042	4.73709	4.64056	3.85572	0.809031	0.857596	0.945071	0.580493	0.829556
IPI00658109.1	CK	Acidic-type mitochondrial creatine kinase	0.274866	0.100544	0.306275	0.400507	0.292884	0.23059	0.193969	0.253437	0.740617	0.339198	0.294431	4.77202	0.500173	0.269564	1.70882	0.189513	0.518461	1.27834	0.223845	5.48697
IPI00301058.5	VASP	Vasodilator-stimulated phosphoprotein	0.331504	0.170035	0.199215	0.426288	0.0679115	0.363821	0.603197	0.575784	0.390393	0.416474	0.329078	0.300138	0.388692	0.256993	0.35026	0.0164556	0.0216933	1.96633	0.254122	1.36002
IPI00945650.1	ACPP	cDNA FLJ54158, highly similar to Prostatic acid phosphatase to	0.748513	2.79394	0.212819	0.830528	0.496546	0.310443	0.316373	1.07661	0.254247	0.217366	0.145622	0.354904	0.566717	0.802292	0.31541	0.293837	0.284412	0.42796	0.279208	0.429909
IPI00013860.3	HIBADH	3-hydroxyisobutyrate dehydrogenase, mitochondrial	0.590783	0.647342	1.28263	1.12842	0.291345	1.73351	0.388827	0.929998	0.5208	1.08809	1.30062	1.06999	1.04928	1.04761	0.845807	0.566872	0.644301	1.1829	0.218245	1.34838
IPI00059366.4	H2AFY	Isoform 3 of Core histone macro-H2A.1 histone	28.225	20.3563	28.884	34.0906	39.4786	28.6388	21.1268	31.7746	24.6668	21.8946	26.3531	35.4521	28.812	22.6384	37.8836	0.415019	0.265585	0.848161	0.996204	1.00069
IPI00025512.2	HSPB1	Heat shock protein beta-1	80.0206	78.537	101.195	110.684	94.5234	119.826	102.943	98.2646	121.879	111.879	181.396	136.041	85.2011	97.7212	71.0518	0.447604	0.0502716	1.1932	0.357101	1.22895
IPI01011139.1	GOLT1B	8 kDa protein	0.135119	0.120826	0.131187	1.05438	0.522861	0.346277	1.13895	0.460732	0.318839	1.37107	0.415811	0.336412	0.205755	0.49665	0.378457	0.273757	0.276475	1.8509	0.895087	0.933163
IPI00022228.2	HDLBP	Vigilin	6.74304	8.90058	5.09824	1.83693	4.27493	5.36062	4.56843	5.9196	4.6117	4.20761	4.83998	2.33092	1.94113	1.802	4.68517	0.155569	0.737214	0.918605	0.147454	0.580895
IPI00219330.2	ILF3	Isoform 5 of Interleukin enhancer-binding factor 3 enhancer-binding	19.3492	19.9456	16.9851	18.6655	20.9024	17.1841	14.1595	17.4687	4.6972	13.1619	23.0309	14.4911	17.3589	16.0522	17.2103	0.0642646	0.0636759	0.695596	0.371921	0.919618
IPI00553153.2	ATPIF1	Isoform 1 of ATPase inhibitor, mitochondrial inhibitor,	0.508106	0.561906	0.481531	0.62781	0.192269	1.13564	0.684347	0.504002	0.329009	0.407141	0.549503	0.558411	0.807089	0.245654	0.344745	0.649199	0.427922	1.29031	0.833142	1.05641
IPI00879231.1	SERPINF2	Alpha-2-antiplasmin	0.300617	0.117807	0.338587	0.344649	0.218242	2.15397	0.317142	0.341226	3.0872	2.75414	5.85066	2.25777	0.343385	0.447078	0.186999	0.259319	0.0680301	6.5563	0.222569	6.88376
IPI00908896.2	HNRNPH1	Uncharacterized protein	9.45384	11.2628	6.49802	20.0482	18.3029	9.74999	9.83824	13.342	10.8063	11.4327	14.1703	10.341	22.8607	11.234	10.7302	0.614152	0.477372	0.841433	0.835123	1.05751
IPI00964457.1	MGAT1	Uncharacterized protein	0.22511	0.269415	0.71163	0.727591	0.485889	0.402678	0.569513	0.305639	0.47477	0.350091	0.294145	0.240799	0.237846	0.209279	0.151564	0.0505886	0.605356	0.869011	0.0709398	0.468514
IPI00936417.1	HLA-II	HLA class II histocompatibility antigen, DR alpha chain	0.19065	0.437908	0.271533	0.281323	0.419197	0.344315	0.246644	0.483136	0.486226	0.549123	0.168078	0.148486	0.203021	0.248359	0.193124	0.00895622	0.198918	1.3179	0.0506718	0.600438
IPI00031522.2	HADHA	Trifunctional enzyme subunit alpha, mitochondrial mitochondrial	31.9712	30.438	35.1536	49.9253	55.5687	35.0781	47.8451	48.5668	49.4466	38.5778	21.0741	42.1453	39.413	30.5373	34.3467	0.214614	0.594921	1.08105	0.294406	0.824973
IPI00104050.3	THRAP3	Thyroid hormone receptor-associate	0.673897	0.736879	0.456409	0.32599	0.406549	0.0880703	0.408923	0.220691	0.177427	0.282946	0.323223	0.181369	0.255944	0.304096	0.608066	0.0383105	0.0205876	0.453147	0.122907	0.643414
IPI00909764.1	=-	cDNA FLJ56650, highly similar to Matrilysin to	0.128934	0.22416	0.343242	0.460924	0.451407	0.35211	0.270969	0.229203	0.623041	0.274523	0.189412	0.201605	0.152597	0.144586	0.172241	0.0916152	0.776283	1.08776	0.0806858	0.534878
IPI01013673.1	TIAL1	Uncharacterized protein	0.560078	0.238705	0.259715	0.355347	0.416388	0.372394	0.292762	0.22272	0.521197	0.340352	0.912819	0.53237	0.315038	0.234328	0.248635	0.692047	0.838196	0.955848	0.579234	1.22563
IPI00642213.1	RALY	Uncharacterized protein	5.2267	3.54602	8.85382	6.92157	7.01382	4.04265	2.36904	5.90157	5.77532	5.76652	7.49018	7.97674	4.50773	3.79421	5.58865	0.407414	0.213579	0.755819	0.725908	0.930156
IPI00981529.1	MRPL49	Protein	0.336202	0.190518	0.209366	0.508423	0.350212	0.197935	0.487881	0.157694	0.261938	0.22721	0.516414	0.351964	0.342624	0.651348	0.387831	0.111849	0.538076	0.835669	0.150118	1.41102
IPI00298547.3	PARK7	PARK7 Protein DJ-1	22.5335	15.1884	14.0568	16.247	29.0567	14.9244	19.569	24.119	14.418	21.2369	4.01305	15.7306	19.5989	19.5419	7.72428	0.245568	0.872423	0.971003	0.189933	0.686104
IPI00914938.1	AP2A2	Isoform 1 of AP-2 complex subunit alpha-2 complex	4.0025	2.09435	1.65772	2.30729	0.945271	2.13051	1.76639	0.743188	1.42287	0.488185	0.172671	0.464355	1.12225	0.875088	1.14274	0.0434923	0.179127	0.595172	0.0434067	0.343151
IPI01012347.1	MRE11A	Uncharacterized protein	0.307125	0.230079	0.173223	0.39461	0.62999	0.803461	0.215207	0.302499	0.432299	0.393218	0.495103	0.553556	0.532886	0.597206	0.507015	0.239066	0.540999	1.23726	0.0750564	1.54797
IPI00980124.1	DUSP3	Conserved hypothetical protein	0.316768	0.268185	0.0840097	0.266887	0.3643	0.298748	0.239949	0.536481	0.64555	0.871094	0.231454	1.21689	0.242138	0.639936	0.720215	0.173436	0.0900274	1.99348	0.127074	2.34637
IPI00006663.1	ALDH2	Aldehyde dehydrogenase, mitochondrial	0.541488	2.88246	0.167798	3.50059	0.442976	6.18811	5.43696	2.34372	9.53677	5.1273	0.360058	2.00347	1.43664	5.50179	5.73105	0.0340305	0.0179993	3.79982	0.288092	1.99501
IPI00297779.7	CCT2	T-complex protein 1 subunit beta beta	20.6805	17.3084	17.9449	15.2729	22.7186	20.2858	21.2487	21.0712	32.6068	24.1625	11.6407	16.9393	21.231	21.84	10.9132	0.0637781	0.0981347	1.27096	0.422017	0.879041
IPI01025680.1	NPC2	13 kDa protein	0.244431	0.128951	0.187934	0.235044	0.539726	0.251007	0.642514	0.58366	0.135541	0.628115	0.276567	0.230526	0.395349	1.20105	0.386355	0.425788	0.199581	1.67716	0.281449	1.86354
IPI00031655.1	VPS25	Vacuolar protein-sorting-associated protein 25	0.283221	0.183138	0.710251	0.210195	0.561011	0.295555	0.075316	0.0618493	0.279419	0.159951	0.703587	0.275476	0.156074	0.291911	0.340612	0.204396	0.114418	0.447727	0.802972	0.907509
IPI00879616.1	2016-09-05	Uncharacterized protein	0.163199	0.20024	0.223974	0.383182	0.219851	0.51602	0.454074	0.619296	0.354707	0.494725	0.184143	0.309326	0.23519	1.08463	0.151785	0.282627	0.00250978	2.04867	0.431622	1.6507
IPI00873286.2	EIF3C	highly similar to Eukaryotic translation initiation factor 3 subunit 8	1.82931	1.99875	1.29477	2.51856	0.350115	1.81957	1.29217	0.622912	0.620069	1.66497	4.51085	1.045	3.42547	3.24091	1.97083	0.0502515	0.406152	0.753262	0.125066	1.77602
IPI00299738.1	PCOLCE	Procollagen C-endopeptidase enhancer 1	0.145834	0.182935	0.231134	1.72035	0.37935	0.230718	2.67697	1.12912	2.24342	1.84536	2.58524	3.15732	0.293697	0.455967	2.23861	0.154202	0.0753611	3.05519	0.111992	3.28276
IPI01015174.2	ACOX1	Acyl-coenzyme A oxidase	0.127088	0.147675	1.05746	0.407367	0.355519	0.418848	0.269826	0.473882	0.942197	0.566717	0.195129	0.23676	0.464741	0.233517	0.112337	0.286833	0.588122	1.2751	0.384383	0.593041
IPI00020021.3	DEK	Protein DEK	0.414114	0.734126	1.0357	1.26813	0.32651	0.139303	1.24022	1.31613	1.10305	1.02477	1.72202	0.899441	1.62068	1.57658	1.1921	0.0755823	0.474357	1.27653	0.0262815	1.85541
IPI01010893.1	LAMTOR1	Protein	0.12219	0.143041	0.964866	0.62855	0.24528	0.205399	0.157377	0.564052	1.79776	0.935818	1.53581	0.197319	1.15445	1.04044	1.14504	0.243755	0.397795	1.7398	0.0657525	2.41123
IPI00010157.1	MAT2A	S-adenosylmethionine synthase isoform type-2	4.53185	2.13732	2.76102	3.36825	2.4402	1.62338	2.01224	2.57326	1.70539	1.86154	1.87566	1.57494	4.26102	1.4285	1.56526	0.168173	0.0595361	0.641515	0.222407	0.702516
IPI00339223.2	FN1	Isoform 3 of Fibronectin	157.816	139.073	29.3177	45.1327	25.3006	8.4497	21.7433	84.9181	89.3255	9.06181	25.7464	23.8679	11.4518	10.1753	27.8866	0.140657	0.317038	0.538267	0.105474	0.249919
IPI00983620.1	LOC650157	peptidyl-prolyl cis-trans isomerase A-like	3.6085	1.55122	1.24177	1.80989	4.63221	1.38319	0.607392	2.83098	0.496443	5.37811	6.48542	4.379	0.855121	7.36814	4.47442	0.14734	0.713427	0.832798	0.147437	1.83454
IPI00016179.1	IPI00016179.1	MIR3198-1 22 kDa protein	1.9156	2.91784	3.90034	5.64863	4.07218	3.07737	1.66578	1.89895	3.85679	3.21229	4.67932	2.92858	3.59477	3.05252	3.19164	0.354447	0.24595	0.742969	0.783087	0.945393
IPI01021488.1	CBX5	MIR3198-1 22 kDa protein	0.229824	0.428094	0.294696	0.527631	0.275572	0.290961	0.291911	0.482065	0.416879	0.248704	0.256637	0.182909	0.0895167	0.303023	0.162566	0.062581	0.944701	0.985593	0.0557044	0.56649
IPI00940245.1	IGHA2	Immunoglobulin heavy chain variant (Fragment) (Fragment)	0.0814241	0.118151	0.102927	0.342838	0.296499	0.240916	0.202136	0.248239	0.764718	0.332471	0.794765	0.257546	0.724873	0.520691	0.120876	0.159759	0.198776	1.89892	0.086835	2.56811
IPI00911039.1	HSPA1B	highly similar to Heat shock 70 kDa protein 1	0.261811	1.11977	2.71584	3.71098	0.30093	3.65482	3.46247	2.85759	10.5261	2.59332	0.37985	4.00999	1.21344	1.07423	1.23217	0.0905268	0.120644	2.84787	0.966781	0.97538
IPI01014238.1	SERPINB1	cDNA FLJ53963, highly similar to Leukocyte elastase inhibitor to	4.64958	1.35981	3.26753	4.86318	4.154	3.11687	4.14997	2.69914	1.73724	3.61902	5.25285	5.33874	2.05495	5.95788	0.958932	0.70571	0.459401	0.837552	0.837308	1.06938
IPI00002214.1	KPNA2	Importin subunit alpha-2	0.260237	0.303886	0.220599	0.249394	0.326986	0.190043	0.383766	0.293473	0.20215	0.356853	0.314428	0.826221	0.758541	0.333648	0.195454	0.13754	0.775879	1.04789	0.171105	1.78406
IPI00219299.4	TLN2	Talin-2	0.132476	0.466064	0.142319	0.226032	0.482667	0.3962	0.190518	0.128791	1.01227	0.350576	0.254476	0.205185	0.359185	0.428302	0.67633	0.715805	0.500145	1.43379	0.426258	1.32694
IPI00604778.1	VPS13C	Isoform 4 of Vacuolar protein sorting-associated protein 13C protein	0.308662	0.206541	0.132751	0.0916259	0.361283	0.252263	0.164288	0.543292	0.146503	0.293209	0.312559	0.169305	0.385954	0.311694	0.243012	0.661108	0.51659	1.27132	0.338669	1.29219
IPI00299155.5	PSMA4	Proteasome subunit alpha type-4	5.13121	3.54995	3.81346	5.00719	6.08349	3.82962	4.06738	3.31774	3.92284	3.48365	5.81871	4.33641	4.51367	3.99806	2.75949	0.249204	0.0990119	0.789527	0.540432	0.908461
IPI00013894.1	STIP1	Stress-induced-phosphoprotein 1	9.03297	13.6772	12.3206	10.3661	15.0846	8.39715	13.6034	9.72906	8.85259	8.48844	17.6856	11.3695	8.14097	8.24717	9.60443	0.497039	0.158322	0.811335	0.617974	0.910158
IPI00930442.1	IGHG4	Putative uncharacterized protein DKFZp686M24218	0.305004	4.30377	0.271007	6.36297	2.38618	2.89869	8.13815	0.337978	17.2222	14.1115	6.56912	9.45843	2.4958	7.20251	3.17686	0.191802	0.148716	3.13367	0.119934	2.12069
IPI00306290.5	XPOT	Exportin-T	0.262156	0.427146	0.175325	0.239301	0.171455	0.282222	0.522753	0.339739	0.489812	0.128381	0.561984	0.4909	0.191299	0.29966	0.67755	0.210421	0.292744	1.38226	0.105836	1.74175
IPI00396242.3	GNLY	Isoform Short of Granulysin	0.167403	4.40273	9.99773	3.98147	19.764	9.19787	7.74572	8.68364	38.3299	50.1056	104.409	29.0809	2.33513	68.584	11.7029	0.164749	0.172515	2.97711	0.135573	5.64065
IPI00902914.2	TM9SF2	Uncharacterized protein	0.196132	0.200768	0.251721	0.343433	0.272117	0.194926	0.571371	0.821026	0.507472	0.73596	0.495824	0.372703	0.207689	0.366021	0.527887	0.03096	0.0425921	2.23922	0.0675962	1.55843
IPI00026970.4	SUPT16H	FACT complex subunit SPT16	1.84676	1.23132	0.678772	1.37688	1.3744	0.911112	0.405283	1.39561	0.514913	1.1805	1.28681	1.05555	1.41069	0.824619	1.62902	0.221332	0.153097	0.677218	0.803279	0.953683
IPI00032851.1	COPZ1	Coatomer subunit zeta-1	3.16367	2.58363	4.50773	2.00653	6.02976	1.9476	0.53333	0.53444	0.404076	0.592136	1.74521	0.222889	5.49378	2.68087	0.960661	0.0404885	0.0133546	0.219316	0.254484	0.607032
IPI00290462.5	CBR3	Carbonyl reductase [NADPH] 3	0.208873	0.721464	0.59066	0.224658	4.18144	0.192256	0.777816	0.295617	0.640558	0.164413	0.390826	1.38645	0.876363	0.225923	0.12181	0.490188	0.368144	0.349355	0.494486	0.506382
IPI00031564.1	GGCT	Isoform 1 of Gamma-glutamylcyclotransferase	1.64308	1.31759	0.168802	0.291022	2.66715	0.103852	0.656333	2.73948	0.363997	0.326578	0.402065	0.104545	2.2032	0.359933	0.224238	0.673701	0.5856	0.688319	0.382439	0.541093
IPI00018146.1	YWHAQ	41701 protein theta	36.3303	37.2999	33.8598	42.1132	40.9701	47.0884	35.1853	37.8311	37.0166	45.9311	31.4612	16.1706	46.225	51.2791	24.6327	0.534149	0.416962	1.06548	0.566864	0.890831
IPI00646917.1	NUDT21	Cleavage and polyadenylation specificity factor subunit 5 factor	1.83452	3.2134	2.46793	0.343814	2.53819	0.335387	2.77772	0.215163	3.83812	1.36936	0.291446	0.224269	2.51769	2.14474	2.10482	0.744819	0.676151	0.820915	0.395182	0.70043
IPI00916111.3	MDH1	Malate dehydrogenase, cytoplasmic	15.6014	18.4737	15.0584	21.8946	29.8446	12.9295	13.2406	18.3105	20.0315	16.3781	19.1676	16.0277	14.2264	17.1698	14.186	0.245167	0.237125	0.801905	0.220141	0.800788
IPI00016339.4	RAB5C	Ras-related protein Rab-5C	5.17981	3.79921	5.12908	6.38285	5.03328	6.13941	6.09109	5.83285	6.72158	6.94705	6.18897	6.24067	5.74896	7.35385	3.96439	0.142472	0.0357578	1.24321	0.283358	1.15564
IPI00936738.1	TOR1AIP1	Isoform 1 of Torsin-1A-interacting protein 1 protein	0.228918	0.377697	0.156844	0.399426	0.231102	0.126921	0.715637	0.466678	0.459106	0.330885	0.320523	0.197551	0.431999	0.304117	0.190505	0.288255	0.237037	1.50592	0.879318	1.03638
IPI00909774.3	PRPF40A	Uncharacterized protein	0.174234	1.81466	1.27271	0.582528	0.508493	0.315672	0.191272	0.131963	0.33772	0.163867	0.227116	0.156833	0.266296	0.176777	1.58458	0.192515	0.0954358	0.262025	0.365823	0.554057
IPI00020416.8	TPP2	Tripeptidyl-peptidase 2	0.529719	2.25308	0.257349	0.369053	0.314624	0.498892	0.344172	0.271816	0.230654	0.206426	0.263377	0.188757	0.210939	0.483638	0.161376	0.281516	0.318399	0.416765	0.274143	0.351275
IPI00003635.4	ERGIC1	cDNA FLJ56280, highly similar to Endoplasmic reticulum-Golgi intermediate compartment protein 1 to	0.607687	0.993437	0.7829	1.56363	1.64057	0.142526	0.121523	0.618523	0.679384	1.02513	0.210676	0.43395	1.16805	0.233857	0.700521	0.0729492	0.0575776	0.462952	0.0719495	0.491578
IPI00302850.4	SNRPD1	Small nuclear ribonucleoprotein Sm D1 D1	8.21352	3.74743	9.2702	15.1958	11.4446	12.7401	10.9049	15.5776	20.8663	12.5987	0.122742	10.917	12.2346	6.06791	7.9486	0.0614399	0.089971	1.51838	0.47841	0.778977
IPI01014501.1	TMED5	Uncharacterized protein	0.478205	0.37462	0.809498	0.337065	1.69525	0.290357	1.01024	0.28033	1.29226	0.337322	0.920124	0.36377	0.210969	0.111824	0.901375	0.740874	0.77736	0.868965	0.4632	0.678838
IPI00908696.2	ARL6IP5	Uncharacterized protein	0.201409	5.4024	3.69071	3.22724	0.302939	3.49623	0.893352	4.47814	0.676143	1.27324	0.1831	0.436908	0.37126	0.488659	0.515306	0.126592	0.760387	0.843459	0.0988709	0.155577
IPI00966408.1	HSD17B11	Uncharacterized protein	0.120759	0.303591	0.73872	0.387643	0.785237	0.981187	0.432748	0.588168	0.928646	0.997508	0.143597	0.386999	0.389717	0.855417	0.274675	0.101798	0.102459	1.68165	0.753371	0.877761
IPI00025318.1	SH3BGRL	SH3 domain-binding glutamic acid-rich-like protein protein	5.28059	4.27374	1.0403	1.57604	6.11605	6.18854	3.54233	3.56846	3.90359	5.55698	4.4432	2.82255	3.39756	5.92371	1.51121	0.650279	0.464287	1.24461	0.97678	0.989692
IPI00930343.1	ACTC1	cDNA FLJ78096, highly similar to Homo sapiens actin, alpha, cardiac muscle (ACTC), mRNA to	154.236	284.385	232.599	150.592	179.744	201.495	109.092	110.255	196.012	167.742	109.236	104.351	157.27	260.33	92.9962	0.316888	0.221558	0.783377	0.205505	0.723058
IPI00642211.3	RNPEP	Aminopeptidase B	0.616725	0.692507	0.304413	0.523623	1.01017	0.226675	0.242155	0.392374	0.254652	0.236301	0.21699	0.126403	0.439367	0.36216	0.164186	0.00801507	0.0334304	0.429606	0.0299024	0.415927
IPI00745893.2	LOC728825	SUMO2 small ubiquitin-related modifier 2 isoform b precursor	3.89521	3.40511	2.63116	7.87893	7.35946	6.68348	3.5186	4.68387	4.48498	4.81154	7.55798	5.35282	7.27224	4.84132	5.07357	0.522757	0.874328	0.96077	0.450284	1.19579
IPI00940959.1	ARL8B	ADP-ribosylation factor-like protein 8B	0.260183	0.095802	0.459265	0.357199	0.62369	3.00882	0.460221	3.30191	5.02701	0.236432	0.170968	1.36311	0.246934	0.409632	0.201311	0.0352568	0.0871908	6.70015	0.642441	1.33172
IPI00180128.4	BZW1	Isoform 2 of Basic leucine zipper and W2 domain-containing protein 1 leucine	0.475362	0.332586	0.25139	0.156323	0.339175	0.197798	0.138744	0.258368	0.403265	0.311024	0.363065	0.215521	0.247448	0.256637	0.159287	0.594104	0.501909	0.842018	0.350859	0.798771
IPI00295992.4	ATAD3A	Isoform 2 of ATPase family AAA domain-containing protein 3A family	0.563583	0.434763	1.37021	0.239484	0.752728	0.356136	0.308363	0.258046	0.15717	0.267925	0.408073	0.504491	0.372445	0.391776	0.868321	0.114472	0.105749	0.400991	0.477138	0.757298
IPI00946735.2	SKIV2L	Uncharacterized protein	0.309948	0.338095	0.121371	0.580272	0.429164	0.388531	0.462716	0.325787	0.354855	0.426791	0.162972	0.192937	0.16566	0.354879	0.199755	0.0648225	0.668996	1.10109	0.144818	0.604999
IPI00964346.1	LEMD2	Uncharacterized protein	0.389852	0.393736	0.525332	0.256512	0.184782	0.311521	0.203274	0.435004	0.574548	0.506137	0.213173	0.277123	0.203895	0.299038	0.0802976	0.0834064	0.548045	1.16013	0.0974784	0.613369
IPI00830039.1	U2AF2	Isoform 2 of Splicing factor U2AF 65 kDa subunit factor	9.12421	5.69976	6.31595	3.07737	3.79369	5.06268	5.23867	9.43224	8.25061	5.70292	4.3298	3.89305	6.04315	8.93334	5.47326	0.661295	0.436193	1.20264	0.926274	1.02362
IPI00178440.3	EEF1B2	Elongation factor 1-beta	6.98422	7.35589	3.29231	0.407169	13.141	8.25976	7.84841	6.91678	12.5064	6.92637	13.4674	7.49537	4.28086	11.213	8.79693	0.464911	0.381977	1.36167	0.323672	1.45134
IPI00003766.4	ETHE1	Protein ETHE1, mitochondrial	1.03936	0.195684	0.358141	0.426288	2.78968	0.54977	0.271721	0.198981	0.343005	0.719267	0.621144	1.00285	0.276452	2.71999	2.56632	0.245437	0.32235	0.433079	0.514233	1.49439
IPI01015376.1	ATP5C1	ATP synthase gamma chain	2.28406	2.20457	4.12244	3.64925	4.96158	0.145058	0.126833	4.2504	1.4709	3.76853	1.36141	3.38534	6.27798	2.78427	3.40959	0.305131	0.192142	0.56682	0.999469	0.999807
IPI00017672.4	PNP	cDNA FLJ25678 fis, clone TST04067, highly similar to PURINE NUCLEOSIDE PHOSPHORYLASE TST04067,	1.82197	1.03061	5.74258	6.48497	2.20763	9.96383	6.04524	1.82918	9.06621	5.33726	3.53841	4.59447	10.0227	5.72272	6.01181	0.22211	0.142088	1.865	0.145308	1.72897
IPI00964000.1	IGJ	Uncharacterized protein	0.674551	0.130815	0.497028	0.172074	0.262029	0.41151	0.269153	0.912249	1.41991	0.65852	0.316527	0.315782	1.07207	2.54806	0.449004	0.344625	0.141495	2.11422	0.240184	2.70743
IPI00893353.1	TAP2	Uncharacterized protein	0.17755	0.0748424	0.274371	0.360008	0.234101	0.276299	0.191737	0.418152	0.319149	0.329443	0.210706	0.18581	1.66497	0.915099	0.257921	0.217815	0.209482	1.36927	0.218012	2.88571
IPI00297084.7	DDOST	Dolichyl-diphosphooligosaccharide--protein glycosyltransferase 48 kDa subunit subunit	5.8175	5.84864	3.11968	2.89347	10.834	0.918213	2.94139	2.56525	5.54543	3.26911	3.48148	3.68611	2.2133	6.04608	5.01935	0.212445	0.150631	0.534466	0.347881	0.717079
IPI01010276.1	SLC1A5	Neutral amino acid transporter	0.498927	0.181256	0.134325	0.827884	0.328235	0.169517	0.316724	0.393408	0.689155	0.344124	0.287732	0.223756	0.184578	0.249118	0.160952	0.338172	0.941568	0.970721	0.243367	0.561312
IPI00974176.1	SKP1	Uncharacterized protein	2.55833	1.98192	1.99073	2.66623	2.46895	0.295535	1.61094	3.19231	0.466096	3.83068	4.55831	3.51616	2.55691	1.64456	2.08435	0.42279	0.562882	0.805368	0.37055	1.23094
IPI00027107.5	TUFM	elongation factor Tu, mitochondrial precursor precursor	20.2872	16.0533	20.8677	20.6877	26.7432	19.9553	27.966	23.333	45.0077	27.6652	27.7535	18.9878	15.783	16.9981	23.204	0.127241	0.148809	1.37546	0.894226	0.981721
IPI00176637.5	EIF2S2P4	Eukaryotic translation initiation factor 2 subunit 2-like protein	0.918722	1.52975	1.16732	1.01326	1.3196	1.06209	1.07281	1.26523	2.46434	0.449035	2.51141	2.06308	1.14639	1.58865	1.64376	0.199673	0.842348	1.06133	0.0594182	1.5051
IPI00019943.1	AFM	Afamin	1.15013	1.64604	0.331527	0.344267	0.449752	0.568251	1.19102	0.281889	0.748773	0.332748	0.390664	0.570421	0.691739	0.198884	0.129597	0.377311	0.623359	0.796253	0.227314	0.505213
IPI00032826.1	ST13	Hsc70-interacting protein	8.64401	9.02733	6.4375	11.4542	11.3758	6.5414	11.0165	8.37622	8.51437	7.6248	8.96063	8.35651	3.01237	5.95995	6.81399	0.138577	0.440009	0.896344	0.085218	0.705247
IPI00917410.1	PRKRA	Uncharacterized protein	0.273422	0.11701	0.14225	0.210925	0.175872	0.18783	0.197237	0.211291	0.392945	0.239833	0.334366	0.679431	0.270669	0.777438	0.162431	0.0691783	0.2248	1.33677	0.0947876	2.41913
IPI00005162.3	ARPC3	Actin-related protein 42403 complex subunit 3 subunit	2.99343	3.47473	2.74271	0.148661	2.70889	4.93312	4.12016	3.46607	1.39387	4.42262	1.11992	0.662779	5.77251	2.65903	0.526389	0.342508	0.177632	1.51932	0.823251	0.889979
IPI00000816.1	YWHAE	Isoform 1 of 41701 protein epsilon protein	145.573	181.761	117.523	144.057	149.179	108.196	97.3494	139.691	141.524	144.648	113.049	94.8319	133.066	127.593	96.7775	0.0635123	0.170075	0.855458	0.0292625	0.765915
IPI00185374.4	PSMD12	26S proteasome non-ATPase regulatory subunit 12 subunit	2.43868	2.47787	3.70455	2.68459	1.50681	3.36359	2.84258	2.09029	0.535441	0.443437	0.182935	0.150966	3.39356	0.147491	2.35773	0.289149	0.34133	0.723928	0.13839	0.486453
IPI00909237.1	SLC2A1	cDNA FLJ55703, highly similar to Solute carrier family 2, facilitated glucose transporter member 1 to	2.95529	1.47386	1.46602	1.19972	1.04659	0.565932	0.559806	0.918849	1.61855	1.92079	1.77682	0.870611	1.98247	1.33302	0.60853	0.488065	0.280533	0.685861	0.486971	0.807157
IPI00848358.1	GBP2	Interferon-induced guanylate-binding protein 2	0.125774	0.449752	0.220309	0.211774	0.221334	0.130074	0.151701	0.151785	0.435124	0.149903	0.249844	0.330037	2.68831	0.459616	0.423431	0.233317	0.610094	0.828832	0.279117	3.37789
IPI00789806.2	LAP3	Isoform 2 of Cytosol aminopeptidase aminopeptidase	4.2012	4.17825	3.09728	3.03816	2.22468	2.8703	2.95632	2.1133	0.576663	3.20895	5.22706	1.78102	6.0444	9.32174	3.65127	0.0758195	0.140254	0.700467	0.220657	1.55473
IPI00032957.1	UBE2I	SUMO-conjugating enzyme UBC9	0.251059	1.93871	0.188731	1.81479	3.4989	2.06652	1.16837	1.50285	0.376547	2.06337	2.10877	1.29226	2.80131	1.7256	1.13281	0.821222	0.886511	0.933109	0.703451	1.17792
IPI00007702.1	HSPA2	Heat shock-related 70 kDa protein 2 protein	12.7251	11.2973	10.3023	15.4646	23.6965	9.24133	3.13117	6.02725	16.1158	4.74169	8.06906	15.5787	1.22239	4.8229	6.38108	0.0830583	0.0739652	0.534215	0.0581288	0.490899
IPI00010740.1	SFPQ	Isoform Long of Splicing factor, proline- and glutamine-rich factor,	34.0693	34.6024	35.8972	48.1178	41.3037	36.5348	30.8073	49.5049	51.2187	37.3542	17.5707	22.728	42.0811	34.918	24.1023	0.0730171	0.646498	1.05892	0.0853249	0.728903
IPI00926815.1	RPL37A	Uncharacterized protein	2.34453	1.173	0.255377	0.204419	1.23833	0.284974	0.199575	3.2551	3.44451	1.68331	0.401981	3.71922	0.1125	3.06354	1.94922	0.607155	0.394158	1.70016	0.357415	1.77283
IPI00185146.5	IPO9	Importin-9	0.233129	1.40017	1.03175	0.245569	0.229776	1.48555	0.827998	0.447947	0.187947	0.423167	0.142655	0.236498	0.274618	0.196895	0.183812	0.21369	0.893378	1.07394	0.16352	0.32941
IPI00301280.2	TMEM43	Transmembrane protein 43	1.88413	1.19441	2.48389	0.257581	0.344625	5.4513	3.64976	0.137901	0.400729	4.40426	0.17834	0.350163	4.68159	3.63159	1.64547	0.443147	0.229609	2.27815	0.418499	1.70118
IPI00984888.1	HOOK3	Protein	0.203063	0.165328	0.240482	0.275076	0.766416	0.387347	0.488727	0.370463	0.535924	0.387831	0.395103	0.262102	0.289694	0.11163	0.178798	0.228503	0.411378	1.31504	0.521802	0.749729
IPI00641719.1	SURF4	Uncharacterized protein	12.3018	5.05356	1.85138	4.68679	8.1698	2.38535	6.63364	1.80888	1.11088	2.95509	1.01628	1.34864	1.16296	6.76599	2.62206	0.121678	0.139505	0.464513	0.111308	0.402825
IPI00387022.3	-	Ig kappa chain V-I region AG region	4.55673	3.06928	2.44443	2.63098	0.611659	1.71558	3.1685	1.41991	2.89588	1.4838	1.43594	1.44113	0.520078	3.00466	0.485351	0.228237	0.498601	0.802494	0.142105	0.517323
IPI00455315.4	ANXA2	Isoform 1 of Annexin A2 A2	225.581	182.039	271.743	392.106	357.426	321.929	318.401	238.393	589.44	303.615	393.931	340.332	316.684	290.521	273.747	0.55279	0.375298	1.23996	0.435364	1.1304
IPI00744692.1	TALDO1	Transaldolase	30.1858	23.2024	24.8953	39.9687	43.7042	28.826	26.1294	29.0145	26.5824	20.5833	46.6175	32.8495	32.0155	23.3962	30.1252	0.316475	0.213984	0.809696	0.915391	1.01882
IPI00215611.5	CRIP1	Cysteine-rich protein 1	0.143866	0.240332	0.301766	0.595263	0.109409	0.272193	0.979488	0.90125	1.05023	0.378903	0.404777	1.02363	0.157585	0.5508	0.370026	0.112818	0.0536883	2.57584	0.230183	1.80264
IPI00939560.1	TXNDC5	MUTED-TXNDC5 thioredoxin domain-containing protein 5 isoform 3	13.6289	8.38145	13.7133	5.21512	12.8848	8.02555	6.74772	6.82344	10.7123	5.95211	13.1191	4.13389	3.87179	7.74626	8.67041	0.247668	0.153035	0.710862	0.212179	0.697491
IPI00165360.5	MPST	3-mercaptopyruvate sulfurtransferase	5.70727	4.46543	5.85107	5.72946	3.68765	4.84367	5.17551	6.01598	8.80669	4.49026	3.77009	5.5813	9.90186	3.71381	7.13741	0.710868	0.413767	1.15295	0.484344	1.18331
IPI01009317.1	USP7	cDNA FLJ50426, highly similar to Ubiquitin carboxyl-terminal hydrolase 7 to	0.731789	1.41834	1.71166	1.84971	0.872302	0.158263	1.18855	1.71036	0.234637	0.241317	1.05555	1.23705	1.22842	0.388692	3.01948	0.325316	0.156166	0.536639	0.892627	1.05246
IPI00797182.2	ANO10	Isoform 2 of Anoctamin-10	0.165339	0.960395	0.628942	0.274447	0.725879	0.180729	0.185321	0.18813	0.33894	0.349	0.384512	0.234409	0.338564	0.171288	0.204065	0.0633081	0.107991	0.45086	0.12524	0.483788
IPI00945158.1	IAH1	cDNA FLJ60023	0.135166	0.833873	0.216569	0.385927	0.333695	0.721464	0.414114	0.330083	0.503024	0.203359	0.176397	0.228759	0.383394	0.262484	0.274447	0.411582	0.73118	1.14004	0.403272	0.695707
IPI00007928.4	PRPF8	Pre-mRNA-processing-splicing factor 8	2.21468	1.80575	1.44944	1.46378	2.00375	0.218469	3.71561	4.45956	2.8572	4.11616	1.03836	2.23674	3.24969	2.2523	0.301201	0.197705	0.168042	1.7194	0.960336	1.01576
IPI00032003.1	EMD	Emerin	0.68302	0.386168	0.639005	0.334296	0.680846	0.40748	0.351452	0.146097	0.421674	0.307424	0.314907	0.252718	0.194872	0.201172	0.510258	0.0298681	0.0482718	0.600046	0.032975	0.541222
IPI00291510.3	IMPDH2	Inosine-5-monophosphate dehydrogenase 2	1.487	1.59229	1.37373	1.58568	1.7035	1.6568	2.20274	0.892609	0.594768	2.8695	6.67839	5.36025	2.6025	2.84929	2.13539	0.018836	0.832356	1.06125	0.0551766	2.53492
IPI00794082.2	BLMH	cDNA FLJ57650, highly similar to Bleomycin hydrolase to	1.50191	0.591275	0.224704	0.271966	0.26519	0.988628	1	1.01946	0.663745	1.60181	1.90633	1.19889	0.330999	0.112485	0.61951	0.416713	0.135815	1.84713	0.535792	1.45995
IPI00006052.3	PFDN2	Prefoldin subunit 2	0.203909	0.18445	0.147358	0.184016	0.290216	1.07505	0.370591	1.02342	0.150017	0.155458	0.719168	1.54018	1.61967	0.195752	0.139467	0.159405	0.161904	2.7472	0.113805	4.17272
IPI00216659.1	RBM8A	Isoform 2 of RNA-binding protein 8A protein	0.396942	0.611829	0.549618	1.28343	1.10803	0.341818	0.163629	0.178253	0.543217	0.961328	0.999238	0.307829	1.01797	0.197551	0.960994	0.339765	0.159175	0.554007	0.719251	0.881955
IPI00479141.2	SEC13	Protein SEC13 homolog	3.72567	2.69017	3.50594	3.42262	2.76753	2.90573	4.16697	1.97575	0.256815	1.03886	4.37839	3.84211	1.8671	4.02671	3.53497	0.122315	0.172577	0.642016	0.550141	1.09542
IPI00106668.5	PLIN3	perilipin-3 isoform 3	12.9215	10.3675	6.12453	5.92165	6.03101	6.26624	6.29584	5.6209	9.30754	3.56994	1.86051	3.84904	8.29246	6.08602	3.24383	0.138245	0.266789	0.750866	0.0859767	0.564032
IPI00012493.1	SNORD54	40S ribosomal protein S20	21.438	25.3832	20.1778	14.393	12.6872	18.2547	9.21382	13.4609	11.91	11.0311	19.2262	10.3123	16.5734	14.416	11.4066	0.100395	0.0677625	0.678901	0.163356	0.764617
IPI01014223.1	PTPN1	cDNA FLJ50851, highly similar to Tyrosine-protein phosphatase non-receptor type1 to	0.423519	0.0935253	0.131725	0.281713	0.278587	0.301368	0.179692	0.275553	0.819321	0.448475	0.240916	0.323178	0.139525	0.152185	0.195237	0.19153	0.245545	1.67435	0.657486	0.869297
IPI00964983.1	SNORD73A	Uncharacterized	14.417	19.1583	12.8278	16.5562	9.65583	16.5138	14.6233	15.8104	20.1778	18.42	23.6784	15.674	17.5123	17.5622	15.6447	0.222114	0.216236	1.17806	0.14968	1.2404
IPI00945585.1	FAM162A	Uncharacterized protein	0.209671	0.100085	0.131015	0.194387	0.18329	0.298148	0.370463	0.227746	0.259068	0.570224	0.156822	0.240866	0.554977	0.502362	0.452472	0.0461314	0.0382701	2.10844	0.0461264	2.33063
IPI00182373.2	P4HA2	Isoform I	1.4204	1.43455	0.817845	0.316856	0.744116	0.885154	1.07111	0.284993	0.391125	0.588739	0.307871	0.700424	0.308106	0.307786	0.235255	0.0709462	0.282372	0.680454	0.0526231	0.392804
IPI00982721.1	TCEB1	Uncharacterized protein	0.778031	0.438151	0.560855	0.313774	0.328007	0.989177	0.682121	1.14591	0.30636	1.51393	0.408073	0.501632	0.903878	0.414143	0.120884	0.0815824	0.0986978	1.91726	0.929252	0.970974
IPI01022950.1	SLC25A3	Uncharacterized protein	9.55066	10.0631	11.0402	13.6365	12.5264	8.63562	9.36189	9.76622	13.6734	12.4692	14.1154	11.4629	9.35087	9.61842	13.8643	0.785658	0.650466	0.948774	0.807796	1.02807
IPI01008922.1	HK1	hexokinase-1 isoform HKI-td	5.39118	1.90779	3.04723	2.77041	1.92012	2.84475	2.17724	2.86652	0.13288	3.18215	5.97857	3.95287	4.21841	4.17449	4.552	0.025805	0.390366	0.745078	0.0740291	1.52136
IPI00023648.6	ISLR	Immunoglobulin superfamily containing leucine-rich repeat pro repeat	3.34244	1.32198	0.480064	0.454862	0.464774	0.257403	0.374698	0.366834	0.478171	0.735348	0.401842	0.425874	0.81321	2.51228	0.572838	0.409254	0.240659	0.364844	0.70743	0.779347
IPI00978363.2	ITGB2	Integrin beta (Fragment)	0.135475	0.454988	0.132155	0.101609	0.116395	0.303444	0.337861	0.300659	0.643941	0.513345	0.230222	0.339245	0.303949	0.979285	0.0963815	0.270484	0.0417802	2.23177	0.277065	2.07212
IPI01026093.1	GMFB	18 kDa protein	0.150705	0.103249	0.333602	0.220126	0.39164	0.71242	0.316461	0.298996	0.948553	0.303401	0.382333	0.13412	0.239567	0.157782	0.15301	0.0569837	0.110867	2.15108	0.719236	0.889512
IPI00843910.2	FUCA1	Tissue alpha-L-fucosidase	0.811296	0.213514	0.266369	0.310637	0.455303	0.568015	0.207215	0.329763	0.442792	0.259769	1.04659	0.485687	0.257064	0.481164	0.408753	0.509073	0.704153	0.878682	0.491231	1.30243
IPI00024976.5	TOMM22	Mitochondrial import receptor subunit TOM22 homolog TOM22	2.15696	1.56645	2.07398	2.3421	2.10585	1.09893	1.73869	0.410969	3.71974	3.12423	0.611617	0.641668	0.813041	1.15477	1.92519	0.15264	0.963512	0.985088	0.00991031	0.502305
IPI00945920.1	UMPS	Uncharacterized protein	0.0816162	0.245382	0.231503	0.720515	0.229394	0.232419	0.479433	0.219075	0.830412	0.247243	0.867418	0.641002	0.412538	0.857614	0.139777	0.292201	0.549671	1.33159	0.150713	1.93472
IPI00106491.3	MRTO4	mRNA turnover protein 4 homolog homolog	0.507753	0.32235	0.352281	0.201674	0.19191	0.340612	0.285329	1.15942	0.438576	2.71095	0.288791	0.137214	0.321725	0.175215	0.129489	0.126278	0.217954	3.13134	0.178269	0.667802
IPI00020418.1	RRAS	Ras-related protein R-Ras	0.200309	0.155901	0.190122	0.564834	0.999446	1.49672	0.83979	0.37767	0.636442	0.685344	0.489642	0.418906	0.745355	0.612083	0.815637	0.231872	0.160245	1.91222	0.321671	1.46006
IPI00005024.3	MYBBP1A	Isoform 1 of Myb-binding protein 1A protein	0.352281	0.414832	0.400202	0.639448	0.831161	0.329991	0.83503	0.137109	0.202501	0.950725	1.6441	0.388261	0.663147	0.482366	0.465838	0.595662	0.854433	0.930791	0.456737	1.38128
IPI00964643.1	SFXN1	Uncharacterized protein	0.937961	0.67259	1.21714	0.474112	0.384645	0.278993	0.737288	0.493321	0.462428	0.357769	1.49661	0.506172	0.572322	0.825305	0.420186	0.332664	0.165569	0.631989	0.91667	1.03639
IPI00016342.1	RAB7A	Ras-related protein Rab-7a	13.0023	7.1761	7.73875	8.18794	9.14764	8.02388	8.35245	7.48239	11.8285	8.9352	19.6125	13.6422	6.17098	10.662	10.8762	0.247281	0.924739	0.986071	0.247754	1.34718
IPI00871741.2	IFITM2	Protein	1.01403	0.494109	0.304349	0.321279	0.594356	0.304455	2.33383	0.90576	2.92817	0.397052	1.06422	0.147542	0.320434	1.18198	0.951516	0.232815	0.197276	2.51795	0.471074	1.34367
IPI00019269.3	WDR61	WD repeat-containing protein 61	0.109629	0.253736	1.06733	0.307658	0.452503	0.169811	0.488862	0.289272	0.600568	0.101482	0.208815	0.222519	0.350917	0.505892	0.17066	0.661486	0.591515	0.75313	0.446713	0.665861
IPI00000335.1	HINT2	Histidine triad nucleotide-binding protein 2, mitochondrial 2,	0.872121	1.76541	3.11234	1.0921	2.44223	0.150361	0.520475	1.10061	5.14118	0.295781	0.0997666	0.705834	0.644745	0.216659	1.02292	0.319087	0.701351	0.776417	0.030597	0.289732
IPI00789008.1	FLOT2	Flotillin-2	0.713013	0.943046	0.176312	0.976167	1.03354	0.345414	0.391341	0.624252	0.227667	0.395486	1.00961	0.740309	1.06025	0.340683	1.01903	0.0629191	0.0779614	0.516429	0.760953	1.08532
IPI00926625.1	ZYX	Zyxin	0.254935	0.174706	0.177858	0.777169	0.742776	0.324277	0.500416	0.344339	0.316154	0.447637	0.355372	0.124983	0.432089	1.25693	0.106646	0.946569	0.796348	0.908519	0.909192	1.06984
IPI01011531.3	ANXA7	cDNA FLJ54149, highly similar to Annexin A7 to	3.71458	5.79095	6.39259	0.454736	3.74898	1.55348	2.86533	3.12141	4.26901	2.93732	2.79956	2.39612	3.19341	2.08435	3.68228	0.412295	0.382664	0.733592	0.324457	0.704201
IPI00790783.1	LOC100133284	Uncharacterized	0.267962	0.177145	0.192549	0.266443	0.189255	0.358141	0.351915	0.394802	0.46368	0.308683	0.286916	0.235729	0.354978	1.55747	0.121919	0.429396	0.00164451	1.71694	0.330683	2.33868
IPI00430813.3	CNBP	Isoform 2 of Cellular nucleic acid-binding protein nucleic	1.08313	0.285033	0.481464	0.489507	3.31222	0.380034	0.431879	0.264768	0.458026	0.433168	1.46734	0.899129	0.193419	0.468363	1.14258	0.358849	0.260126	0.348213	0.644897	0.738024
IPI00894184.1	PPP1R7	Uncharacterized protein	1.11876	0.993161	0.924599	1.28023	2.37726	1.43624	1.39021	3.08849	2.85205	3.4018	0.400535	2.38039	1.21773	0.710103	1.0314	0.048415	0.0672585	1.81786	0.670131	0.857508
IPI00788157.1	XRN2	Isoform 2 of 42493 exoribonuclease 2 exoribonuclease	0.27274	0.353015	0.595676	0.353137	0.478337	0.31895	0.183672	0.334482	0.41003	0.172492	0.268669	0.309455	0.322395	0.190505	0.363493	0.127557	0.122662	0.69152	0.110278	0.708516
IPI00843996.1	SRSF3	cDNA FLJ52832, highly similar to Splicing factor, arginine/serine-rich 3 to	0.159674	3.10997	0.292316	0.151386	3.05442	0.408498	2.12712	2.13909	1.88648	2.88126	0.379534	3.667	2.11844	0.434371	0.285389	0.784491	0.534314	1.39521	0.981366	1.01728
IPI00759663.1	PRDX5	Isoform Cytoplasmic+peroxisomal of Peroxiredoxin-5, mitochondrial mitochondrial	39.2086	23.2732	40.6082	36.9397	47.6234	28.3819	29.0749	27.094	48.2013	28.18	35.1609	30.6518	27.7497	31.876	20.8749	0.285513	0.372588	0.857603	0.12189	0.779701
IPI00913911.1	TOM1	Isoform 3 of Target of Myb protein 1 of	0.561945	0.160941	0.265411	1.81995	1.50744	0.157214	0.213247	0.556287	0.482299	0.41211	0.323133	0.120424	0.207603	0.662871	0.170424	0.1507	0.215968	0.421985	0.171617	0.343967
IPI00414676.6	HSP90AB1	Heat shock 84 kDa	296.934	233.73	215.688	275.403	217.821	239.304	241.838	206	232.954	231.617	308.088	177.515	230.448	187.585	118.562	0.362017	0.359458	0.929119	0.265773	0.824636
IPI00947340.1	FKBP8	Uncharacterized protein	0.499065	0.275514	0.322484	0.969223	1.48052	0.181973	0.24879	0.307509	0.843056	0.255005	0.20805	0.312494	0.35194	0.388584	0.39708	0.188952	0.233199	0.517743	0.174377	0.467505
IPI01025629.1	FBLN5	Protein	0.295965	0.114459	0.337439	0.747839	0.59733	1.53156	0.276356	0.17728	0.529609	0.915861	0.346277	1.48535	0.490662	0.380297	0.223927	0.657534	0.364944	1.63909	0.538615	1.39822
IPI00289819.5	IGF2R	Cation-independent mannose-6-phosphate receptor	0.337556	0.145028	0.542464	0.485519	0.733109	0.490934	0.249049	0.364705	0.186274	0.179331	0.649589	0.459552	0.225281	0.438972	0.229346	0.411861	0.22459	0.655305	0.714695	0.892616
IPI00027180.1	ZMPSTE24	CAAX prenyl protease 1 homolog homolog	0.7829	0.0949887	0.284165	0.31191	0.665864	0.352795	0.272892	0.423519	0.316264	0.475494	0.44513	0.297116	0.716829	0.310378	0.322708	0.880137	0.673489	0.860333	0.951344	0.977724
IPI00004860.2	RARS	Isoform Complexed of Arginyl-tRNA synthetase, cytoplasmic synthetase,	3.2621	7.04256	4.17565	1.97698	3.58084	0.291446	2.46536	3.94849	1.5945	2.1177	3.98036	2.83903	1.72238	1.90224	4.65119	0.17751	0.10248	0.519883	0.362759	0.753324
IPI00012575.1	PIR	Pirin	0.0918803	0.118208	0.158549	0.496099	0.585727	0.288751	0.258942	0.586052	0.269471	0.589719	0.196541	0.369591	0.173235	0.222149	0.235011	0.362585	0.428706	1.374	0.662588	0.824927
IPI00009532.5	ABAT	cDNA FLJ56034, highly similar to 4-am to	0.185129	0.215372	0.258637	0.142635	0.464387	0.601944	0.454421	0.213114	1.03663	0.349097	0.225656	0.40607	0.324412	0.214746	0.178476	0.0924914	0.125113	2.09705	0.818367	1.06571
IPI00985251.1	C14orf159	Protein	0.185591	0.342957	0.427205	0.210939	0.32642	0.285349	0.558373	1.11427	1.08313	0.491308	0.18103	1.89133	0.269247	0.234685	1.07185	0.320899	0.0689443	2.36581	0.267218	2.44331
IPI01013988.1	EIF3F	cDNA FLJ52696, highly similar to Eukaryotic translation initiation factor 3 subunit 5 to	1.23456	1.75224	2.73341	2.5697	2.06709	2.92756	3.97154	1.77806	2.52468	1.9964	0.349969	5.38408	0.589474	1.22154	1.07059	0.569625	0.269755	1.27433	0.734646	0.831867
IPI00909083.1	GSPT1	eukaryotic peptide chain release factor GTP-binding subunit ERF3A isoform 2 factor	0.14955	0.291143	0.356482	0.385045	0.343005	0.267127	0.232854	0.520403	0.284244	0.322149	0.627767	0.357496	0.168533	0.243704	0.157203	0.97286	0.765693	1.06658	0.953301	1.01933
IPI00009634.1	SQRDL	Sulfide:quinone oxidoreductase, mitochondrial	1.44193	0.132871	3.03185	1.99129	3.7025	1.23988	2.41379	3.52519	2.97812	1.25466	4.03705	4.39389	3.33711	1.587	4.77533	0.136679	0.781501	1.10788	0.0991658	1.76016
IPI00375407.1	DDRGK1	Isoform 2 of DDRGK domain-containing protein 1 domain-containing	1.72656	0.229935	1.37516	0.189912	0.467002	0.850333	0.646983	0.374153	0.218514	0.384512	0.363871	0.220385	0.171229	0.432838	0.254106	0.221374	0.40804	0.620397	0.183228	0.361641
IPI00167030.3	KRTCAP2	Keratinocyte-associated protein 2	4.83696	1.74158	3.25014	1.87358	1.99129	1.2416	1.24712	1.36983	1.57636	2.25402	2.49735	1.80438	1.54382	1.07319	3.94438	0.222116	0.112606	0.561501	0.485416	0.793302
IPI00008552.6	GLRX3	Glutaredoxin-3	0.648869	0.211466	0.277239	0.512207	0.738669	2.13214	3.3097	0.394638	1.09764	0.212686	0.278915	0.485822	0.186339	0.243721	0.279264	0.0768143	0.176304	2.99223	0.161809	0.617162
IPI00013475.1	TUBB2A	Tubulin beta-2A chain	0.162521	0.956542	1.18772	0.391016	2.54594	1.19665	0.628376	0.619253	0.215401	0.37475	3.28342	3.43855	0.216074	0.56656	1.59284	0.217291	0.368872	0.578676	0.362444	1.73491
IPI00926977.1	PSMC6	26S protease regulatory subunit 10B 10B	9.20744	10.0026	5.61739	5.52242	2.76868	5.42454	4.31961	4.86756	7.44979	3.64369	3.93619	1.30071	4.92765	3.16258	2.82804	0.0670603	0.355182	0.776158	0.0619068	0.487799
IPI01014262.2	VPS26A	Uncharacterized protein	0.853995	0.624122	1.1603	0.307914	2.60684	0.168837	1.36699	0.199105	1.84881	1.08493	0.302184	0.72608	0.720465	1.11188	1.00661	0.748711	0.741695	0.840722	0.461997	0.696398
IPI00979496.1	SCYL1	Protein	0.667297	0.202066	0.252473	0.172217	0.317098	0.182327	0.442178	0.180266	0.555131	0.131397	0.0685072	0.127123	0.0692424	0.175787	0.373971	0.332706	0.850419	0.925611	0.178105	0.505621
IPI00400849.2	PICALM	Isoform 3 of Phosphatidylinositol-binding clathrin assembly protein clathrin	1.39069	2.16715	1.72979	1.83121	1.37316	1.85678	2.07657	3.32142	2.97791	1.74642	0.780408	0.782954	1.66359	3.15229	0.611998	0.147597	0.0961029	1.41063	0.574365	0.823273
IPI00647328.6	ALDH4A1	Uncharacterized protein	0.256904	0.309712	1.21841	1.11011	1.54424	0.472799	0.297364	0.659434	0.864477	0.306424	0.907016	0.183532	0.455745	0.566089	0.990686	0.368777	0.240833	0.58578	0.400517	0.698987
IPI00022895.8	A1BG	Isoform 1 of Alpha-1B-glycoprotein	2.64561	2.46178	1.68997	2.67437	1.78869	6.88712	4.97398	4.63124	9.64111	4.9362	9.22469	6.77349	0.200462	2.16205	2.28438	0.0786984	0.0123095	2.75919	0.325106	1.83342
IPI00012828.3	ACAA1	3-ketoacyl-CoA thiolase, peroxisomal	4.1079	1.45761	1.86568	2.21514	0.775339	2.82902	3.7495	3.89548	4.3232	2.23303	0.849685	3.60001	3.15973	0.145683	2.48303	0.179381	0.0916361	1.63412	0.967428	0.982389
IPI00556082.3	SNX1	Sorting nexin 1 isoform a variant (Fragment) a	0.116338	0.246695	0.363997	0.490798	0.362914	0.169599	0.136948	0.31347	0.372032	0.24394	0.625768	0.489439	0.298458	0.29654	0.174706	0.387025	0.398512	0.781905	0.568024	1.19242
IPI00908551.1	#REF!	moderately similar to Granulysin	12.0186	1.72967	4.3355	1.61239	0.243214	2.93976	17.9673	10.5473	57.6281	30.8436	71.8193	14.2087	0.191378	31.1854	4.5168	0.254422	0.105142	6.01452	0.192853	6.1146
IPI00555956.2	PSMB4	Proteasome subunit beta type-4	2.54806	2.87468	3.86428	1.36094	2.48217	2.81103	1.92666	2.12771	2.59368	2.54841	3.9147	4.4432	3.15098	3.90142	1.82665	0.141846	0.625069	0.9145	0.2131	1.31278
IPI00002521.1	ATP5J	ATP synthase-coupling factor 6, mitochondrial	1.96837	2.51909	3.74717	4.0564	2.71264	3.7386	2.14637	2.26875	4.04069	3.66344	1.94666	1.28218	3.31406	3.55045	1.60514	0.362156	0.767481	1.05693	0.305917	0.779709
IPI00816779.1	HLA-B	LOC441528 Leukocyte antigen	0.146168	0.973937	1.5814	2.67437	0.504106	0.261322	4.5168	4.46265	0.936013	3.64344	0.260942	0.621446	1.84203	0.51792	0.151932	0.0761662	0.16743	2.35038	0.386299	0.577259
IPI00008485.1	ACO1	Cytoplasmic aconitate hydratase	4.82223	2.857	1.04442	2.73379	1.16748	2.05438	0.24562	2.70551	2.30106	2.10118	3.79395	2.80111	2.61136	3.03206	3.48534	0.222728	0.453572	0.745173	0.431307	1.24546
IPI00479145.3	KRT19	Keratin, type I cytoskeletal 19 19	0.219608	0.277123	0.25026	11.3396	0.274523	5.84823	0.276088	10.3309	0.246319	6.54231	0.384725	0.167183	0.127706	0.489507	0.257706	0.234704	0.482113	1.8804	0.379855	0.115429
IPI00217475.2	IFI16	Isoform 3 of Gamma-interferon-inducible protein 16 protein	0.226079	0.197702	0.205641	0.472013	0.263432	0.304645	0.255147	0.27878	0.268967	0.172145	0.299473	0.202122	0.232984	0.289032	0.142358	0.744209	0.771219	0.937589	0.521738	0.854273
IPI00385066.2	SCARA5	Isoform 3 of Scavenger receptor class A member 5 receptor	0.43718	0.153531	0.194751	0.459934	0.2642	0.686533	0.268483	0.904881	0.300576	0.311996	0.354855	0.349509	0.164197	0.335434	0.213899	0.195531	0.226502	1.63783	0.81153	0.939253
IPI00642046.1	RSL1D1	RSL1D1 protein	0.143687	0.190677	1.37097	0.33231	0.375582	0.600735	1.23379	0.139332	0.255873	0.303401	3.48293	2.51525	0.380008	0.252053	2.16971	0.0717758	0.938287	1.04969	0.11357	3.64654
IPI00217709.1	TOP2B	Isoform Beta-1 of DNA topoisomerase 2-beta topoisomerase	1.20807	1.30161	1.84382	1.48854	0.214374	2.03397	1.5837	0.491956	3.98285	2.20045	0.971779	1.21537	1.54253	2.26012	2.09101	0.339492	0.227797	1.69951	0.302848	1.33426
IPI00964716.1	SNX2	cDNA FLJ51799, highly similar to Sorting nexin-2 to	0.0837075	0.946714	0.41911	1.28165	0.277489	1.60236	1.22944	0.413942	0.328394	1.26576	1.61619	1.01298	1.38549	1.29666	1.15653	0.0935181	0.308511	1.60865	0.0322829	2.14974
IPI00216319.3	YWHAH	41701 protein eta	4.53279	1.58293	6.11647	4.65571	9.71895	4.02085	5.22127	2.37578	6.14707	2.99239	4.23541	1.734	2.43936	9.15335	3.03543	0.709553	0.463198	0.780151	0.538721	0.774144
IPI01014616.1	GBE1	cDNA FLJ43930 fis, clone TESTI4013441, highly similar to 1,4-alpha-glucan branching enzyme TESTI4013441,	0.0749514	0.136938	0.21173	0.26163	0.378562	0.215536	0.284756	0.170601	0.290699	0.530859	0.776738	0.460349	0.109325	0.22138	0.318177	0.390104	0.323204	1.40293	0.245209	1.77284
IPI00556028.1	GBP1	Guanylate binding protein 1, interferon-inducible, 67kD variant (Fragment) interferon-inducible,	1.40844	0.228854	0.118981	0.416532	0.850333	0.692507	0.285191	1.01136	0.447233	0.711877	0.316878	0.152396	0.445161	0.11714	0.108037	0.177135	0.928446	1.04136	0.190352	0.376963
IPI00021266.1	RPL23A	60S ribosomal protein L23a	8.6578	8.07745	7.97398	12.1207	7.79528	8.3768	7.76884	7.72696	7.10434	7.58684	12.0303	6.64146	9.33274	8.39366	8.24717	0.399874	0.213413	0.864171	0.997413	1.00045
IPI00026964.2	UQCRFS1	Cytochrome b-c1 complex subunit Rieske, mitochondrial Rieske,	0.0958419	0.20537	0.1633	0.105865	0.282437	3.8608	0.262429	0.394282	0.57999	0.791905	0.539016	0.172552	0.301139	2.35365	0.250746	0.331011	0.210911	6.90585	0.251331	4.24137
IPI01010198.1	LPCAT3	Uncharacterized protein	3.20784	2.72508	2.12138	3.45312	3.91253	0.371903	1.41824	2.97543	0.449346	3.63864	0.31745	7.04451	1.75358	0.906325	3.23799	0.525712	0.125204	0.574163	0.743501	0.859916
IPI00005511.1	PHF5A	PHD finger-like domain-containing protein 5A 5A	0.20818	0.512527	0.318221	0.557599	0.206341	0.598573	0.489032	0.485519	0.325719	0.20113	0.0838643	0.149695	0.170873	0.394118	0.220217	0.0975289	0.576632	1.1648	0.127385	0.565082
IPI00791558.1	HBD	Uncharacterized protein	0.376494	0.163788	0.572481	0.347311	0.382174	0.287673	0.321792	0.210662	0.509234	0.708382	0.21276	0.255235	0.198278	0.1786	0.281245	0.154792	0.734181	1.10612	0.0914616	0.611274
IPI00100656.3	TECR	Isoform 1 of Trans-2,3-enoyl-CoA reductase reductase	0.228664	0.338259	1.02236	1.31997	0.263505	0.152639	0.20941	0.292579	0.261485	0.303507	0.128755	0.331045	0.478238	0.611405	0.302415	0.170918	0.157532	0.384405	0.319345	0.583676
IPI00021263.3	YWHAZ	14-3-3 protein zeta/delta	77.4772	64.7586	81.5719	122.124	109.759	123.614	84.6654	99.388	120.351	86.907	101.568	79.6002	96.4427	96.5698	43.5772	0.404346	0.405623	1.12999	0.628699	0.916757
IPI00915022.2	THOC2	Isoform 1 of THO complex subunit 2 complex	0.2355	0.4938	0.313949	0.150674	0.266998	0.180454	0.292843	0.284717	0.472505	0.22721	0.517561	0.244991	0.202529	0.253244	0.106078	0.932654	0.993471	0.997815	0.767132	0.906553
IPI00555577.1	THY1	Thy-1 cell surface antigen variant (Fragment) variant	7.13197	3.36079	2.08493	10.2021	3.66446	3.07567	3.18811	2.4168	5.16977	4.27671	8.43039	6.17312	6.46253	2.99551	4.45245	0.364769	0.33755	0.685481	0.820142	1.07827
IPI00008438.1	RPS10	40S ribosomal protein S10	7.91177	11.9995	13.9636	8.6626	22.8386	3.88146	9.53544	10.0791	14.9658	10.4375	18.8592	9.66587	8.73072	14.3492	13.9733	0.468476	0.338691	0.747971	0.990378	1.00309
IPI00872841.1	UACA	Uncharacterized protein (Fragment)	0.143388	0.361684	0.131006	0.119609	0.340612	0.273611	0.381935	0.183773	0.388854	0.313601	0.261159	0.254352	0.445069	0.328144	0.562451	0.152978	0.218192	1.40635	0.0962616	1.68857
IPI00009328.4	EIF4A3	Eukaryotic initiation factor 4A-III	1.3744	0.819434	1.03226	1.782	1.58898	0.565422	0.111646	2.45445	0.448071	1.95966	2.5029	0.44178	0.351452	1.58403	0.985754	0.916976	0.685865	0.839652	0.749812	0.88917
IPI01014863.1	ACAT2	Acetyl-CoA acetyltransferase, cytosolic	0.12399	1.52108	0.470804	0.314624	2.04344	0.179742	0.287175	0.249567	0.712568	0.564208	0.16738	0.193969	0.135409	0.367929	0.300596	0.140823	0.26321	0.445527	0.15316	0.26046
IPI00018206.4	GOT2	Aspartate aminotransferase, mitochondrial	7.3564	5.58284	7.34163	8.03835	5.30481	5.18412	6.65344	5.0197	6.94753	5.96532	10.7331	13.2958	6.99925	4.33701	8.27179	0.154526	0.281384	0.885382	0.274414	1.29779
IPI00217966.9	LDHA	Isoform 1 of L-lactate dehydrogena dehydrogena	90.7232	68.2284	64.24	85.7937	78.7823	73.0798	62.319	47.716	95.1413	90.6729	168.651	71.9988	85.2483	68.6982	75.6936	0.488558	0.722503	0.951418	0.439717	1.21281
IPI00873684.1	COL4A1	Isoform 2 of Collagen alpha-1(IV) chain alpha-1(IV)	0.892361	0.124171	0.143091	0.32282	0.616383	0.180204	1.39204	1.61519	2.7862	1.44013	2.04316	3.18546	0.148785	2.14682	3.06418	0.0344893	0.0600987	3.53234	0.0331289	5.04491
IPI00009976.1	TMED1	Transmembrane emp24 domain-containing protein 1 1	0.24455	0.171621	0.377121	0.474638	0.33432	0.175118	0.388369	0.238275	0.199671	0.537673	0.109416	0.343838	0.336482	0.169482	0.125139	0.413159	0.887362	0.960591	0.195851	0.676771
IPI00025084.3	CAPNS1	Calpain small subunit 1	3.33064	4.81722	3.96797	9.96866	1.00682	1.70917	0.945075	1.3808	2.79452	0.503373	0.633493	0.202754	5.27255	2.70082	1.26357	0.109664	0.0999922	0.317563	0.180482	0.436233
IPI00014399.2	FHL3	Four and a half LIM domains protein 3 LIM	0.306806	0.119783	0.201005	0.437908	0.179655	0.305597	0.33548	0.258279	0.100481	0.166581	0.348275	0.179207	0.278606	0.170448	0.122343	0.909647	0.830674	0.936764	0.685536	0.882522
IPI01014157.2	ITIH1	Uncharacterized protein	8.81891	5.14225	6.74398	6.45716	0.297714	12.7772	8.42222	7.79257	30.586	9.53346	20.3154	10.4723	4.62996	7.11567	2.84711	0.214701	0.125432	2.5168	0.335073	1.6526
IPI00170796.1	VPS29	Isoform 1 of Vacuolar protein sorting-associated protein 29 protein	0.127053	0.151974	0.357496	0.111375	0.292884	0.502362	0.259409	0.508493	0.193781	0.244042	0.275763	0.297529	0.659297	0.247946	0.210268	0.316189	0.15342	1.64116	0.217488	1.62455
IPI00032293.1	CST3	Cystatin-C	0.174319	0.279399	0.273801	0.414258	0.332079	0.191286	0.607182	0.194104	0.598615	1.13918	0.225656	0.88755	0.506067	0.293656	0.375634	0.374393	0.226176	1.85253	0.245742	1.55277
IPI00011250.3	UCHL3	Ubiquitin carboxyl-terminal hydrolase isozyme L3 L3	0.859876	0.634723	0.836942	1.46023	0.176666	1.77031	0.385927	1.6874	1.44804	1.36661	0.549503	0.672171	1.12311	0.135072	0.274675	0.0603676	0.135414	1.67781	0.394091	0.694109
IPI00300086.4	QPRT	Nicotinate-nucleotide pyrophosphorylase [carboxylating]	3.36382	1.80125	1.29065	0.193446	2.66438	0.34575	0.182884	0.223741	0.266683	1.43774	0.43952	0.861367	0.208569	0.475033	1.32391	0.04059	0.0659203	0.263787	0.0940659	0.355224
IPI00943894.1	PYGL	glycogen phosphorylase, liver form isoform 2 isoform	0.203049	0.168113	0.558024	1.12288	0.477244	0.687533	0.168766	1.08177	0.612338	1.46652	0.32694	3.67412	0.748513	0.416821	1.10565	0.424554	0.319595	1.58816	0.301461	2.47975
IPI00924637.1	OXSR1	Uncharacterized protein	0.109318	0.454484	0.613102	0.813436	0.7051	0.700327	0.728702	0.724672	0.715736	0.37514	0.153637	0.172564	0.372471	0.382889	0.460636	0.0508188	0.462564	1.20373	0.144214	0.572151
IPI00010154.3	GDI1	Rab GDP dissociation inhibitor alpha alpha	1.91149	1.04623	7.58947	3.13942	2.99239	3.80053	4.00139	3.93592	4.7407	3.68126	3.07034	4.4309	2.10716	3.33827	1.12545	0.521096	0.574355	1.20869	0.694072	0.843702
IPI00925158.1	MBOAT7	13 kDa protein	0.168019	0.635208	0.193392	0.669381	0.323066	0.802459	1.29217	0.541863	0.440038	0.373661	0.217668	0.313883	0.903127	1.3262	0.429699	0.440297	0.18608	1.73458	0.345033	1.60406
IPI00013485.3	RPS2	40S ribosomal protein S2	14.256	19.7161	13.9626	11.7966	18.443	11.4701	15.829	16.2312	12.3163	14.5515	22.4089	14.457	14.1772	18.6694	17.453	0.247695	0.406562	0.900528	0.420553	1.11501
IPI00218725.3	LAMA2	laminin subunit alpha-2 isoform b precursor b	0.374568	0.144967	0.361759	0.191657	0.256246	7.18556	0.384539	1.96442	0.323424	0.386838	2.48182	6.99682	0.319082	0.197675	0.29724	0.422963	0.248489	7.70749	0.242118	7.7435
IPI00000811.2	PSMB6	Proteasome subunit beta type-6	0.150163	0.250451	0.202866	0.197757	1.4709	1.32436	1.1869	0.338165	0.310637	0.278163	0.218696	0.322372	0.761914	0.450625	2.276	0.701315	0.518477	1.51321	0.466318	1.77349
IPI00026824.2	HMOX2	Heme oxygenase 2	0.1386	0.542126	0.52163	0.336622	0.253437	0.302478	1.82602	0.409518	0.518782	0.409206	0.453005	0.263231	0.187869	0.214582	0.214775	0.226414	0.313196	1.9337	0.34949	0.743947
IPI00940730.2	ENOPH1	Uncharacterized protein	2.0275	0.669613	0.392346	0.323671	0.420477	0.293962	1.29972	0.18239	0.26893	0.758699	0.321435	0.273213	0.431819	0.312689	0.297116	0.402878	0.607974	0.731348	0.242767	0.426824
IPI01021193.1	RPL18	Uncharacterized protein	23.312	21.8249	24.3137	22.4867	20.6776	18.8776	18.997	20.4015	24.8005	13.317	37.5672	32.5526	20.6791	23.4953	17.2067	0.172911	0.156446	0.855957	0.379071	1.1677
IPI00306516.1	TIMM44	Mitochondrial import inner membrane translocase subunit TIM44 translocase	0.294635	0.280389	0.468071	0.18436	0.360932	0.452848	0.864357	0.346229	0.700424	0.49634	1.61094	0.280078	0.262447	0.493287	1.62462	0.181902	0.0509045	1.80069	0.163565	2.68912
IPI00020956.1	HDGF	Hepatoma-derived growth factor	2.23659	2.52101	3.57638	2.19512	5.31585	7.43071	2.13243	0.287473	1.96619	3.42191	8.91788	0.228268	9.16033	8.74465	3.51348	0.210112	0.931007	0.961739	0.184481	1.92898
IPI00759832.1	YWHAB	Isoform Short of 41701 protein beta/alpha protein	37.4268	38.5377	42.2828	61.7899	45.5033	46.4852	56.6773	47.4258	58.0933	41.1694	38.8058	39.7202	55.2193	39.1543	23.731	0.249846	0.401298	1.10779	0.410378	0.871819
IPI01013654.1	RPRD2	cDNA FLJ54323	0.121649	0.186791	0.0875226	0.237007	0.173499	0.232258	0.201898	0.197168	0.2742	0.207316	0.188691	0.106255	0.315563	0.15059	0.528949	0.372208	0.0829482	1.37989	0.284251	1.59962
IPI00018873.1	NAMPT	Nicotinamide phosphoribosyltransferase	1.51614	2.13465	6.22813	6.32603	7.45909	6.84618	9.62642	3.22836	9.18322	11.5795	0.0917849	13.2003	8.35477	5.59524	5.22597	0.381382	0.111729	1.70992	0.499917	1.37204
IPI00219229.3	LSM3	U6 snRNA-associated Sm-like protein LSm3 LSm3	0.154021	3.06651	1.64137	1.9156	1.97959	0.484208	0.279806	0.298541	1.02207	1.95369	0.641535	0.483705	0.27938	0.399232	0.247723	0.0369585	0.138329	0.461148	0.0446584	0.234276
IPI00917834.1	INPP1	Uncharacterized protein	0.549922	0.21699	0.122733	0.517023	0.214121	0.481765	0.273877	0.215955	0.517489	1.06526	0.16422	0.180416	0.25835	0.307296	0.151501	0.154092	0.321227	1.57599	0.280661	0.655102
IPI00000105.4	MVP	Major vault protein	19.8573	18.1966	21.2325	23.603	27.6882	22.5351	22.3113	23.999	36.3756	28.1059	18.6138	19.5297	26.1692	26.6008	18.1538	0.228332	0.189224	1.20573	0.90695	0.986342
IPI01024996.1	SYNE2	788 kDa protein	0.380113	0.26624	0.324795	0.325696	0.399232	0.378168	0.240799	0.144987	0.264016	0.390799	0.165247	0.339786	0.130344	0.213528	0.231022	0.0927499	0.322333	0.836501	0.0237744	0.636721
IPI00014177.3	Septin-2	Isoform 1 of Septin-2	13.6848	8.29763	9.50311	8.35535	18.6344	11.5306	11.3546	12.0871	17.7211	10.3639	0.25059	7.11173	11.4597	12.7896	6.89094	0.185472	0.712405	1.07836	0.215529	0.658442
IPI00006205.1	SLC33A1	Acetyl-coenzyme A transporter 1	0.324435	0.14313	0.264584	0.436393	0.236646	0.22644	0.192937	0.315979	0.834104	0.419429	0.246251	0.320679	0.288471	0.470446	0.201186	0.546767	0.392993	1.41539	0.724969	1.08671
IPI00981976.2	ZC3HAV1	Uncharacterized protein	0.266628	0.490118	2.92229	0.348541	1.30441	0.275954	0.373635	0.507402	0.627419	0.300742	0.212333	0.124619	0.623776	0.68146	0.338987	0.235031	0.264697	0.391064	0.254455	0.371564
IPI01013280.1	SLC3A2	cDNA FLJ54090, highly similar to 4F2 cell-surface antigen heavy chain to	0.227636	0.164482	0.42958	0.190333	0.423461	0.355692	0.264419	0.391016	0.499792	0.414574	0.314123	0.166235	0.213321	0.186662	0.397107	0.172672	0.201042	1.34135	0.674766	0.889903
IPI00002535.2	FKBP	13 kDa FK506-binding protein	3.02912	0.132632	0.230254	0.340234	0.548134	3.48462	3.08934	3.15863	5.07779	0.30018	8.10325	7.68423	0.187271	0.569592	0.168614	0.318565	0.0545726	3.53019	0.25956	3.90455
IPI00607562.1	ASL	argininosuccinate lyase isoform 2	0.292742	0.190241	0.240149	0.223029	2.60142	2.01866	0.257296	2.31819	0.210341	2.44342	0.205057	2.08681	0.386195	0.371002	0.269545	0.407538	0.3144	2.04306	0.940482	0.935457
IPI00017510.3	COX2	MT-CO2 Cytochrome c oxidase subunit 2	24.4371	14.1301	16.8339	8.86918	16.2774	10.1732	10.4752	12.4373	17.9685	14.5455	20.3534	18.781	14.1988	13.9336	15.6827	0.377451	0.3397	0.81442	0.8703	1.02982
IPI00298961.3	XPO1	Exportin	5.99143	1.76235	2.09696	2.70851	0.416071	0.261848	0.247706	4.09312	0.856129	0.449378	0.688486	1.2479	3.5534	0.297137	2.79239	0.451073	0.268768	0.45534	0.457918	0.661202
IPI00411704.9	EIF5A	Isoform 1 of Eukaryotic translation initiation factor 5A-1 translation	7.6211	9.69338	9.77502	8.22434	9.1413	9.13814	15.1453	10.6849	11.6956	8.51437	3.62505	0.239235	11.8376	9.84097	5.52471	0.0906047	0.145103	1.24121	0.273417	0.698851
IPI00793942.4	PPP5C	serine/threonine-protein phosphatase 5 isoform 2 2	0.110139	0.143518	0.655833	0.284796	0.544725	0.763659	0.276394	0.331022	2.10964	0.512705	0.161041	0.209598	0.649094	0.184079	0.733262	0.304189	0.262671	2.29638	0.81702	1.11389
IPI00376117.1	TOMM40	Isoform 2 of Mitochondrial import receptor subunit TOM40 homolog import	0.570856	0.327985	0.303107	0.195657	0.270481	0.175106	0.114205	0.371646	0.442362	0.211408	1.03304	0.376808	0.254106	0.240165	0.28328	0.490529	0.447787	0.788165	0.551474	1.31132
IPI00017592.1	LETM1	Isoform 1 of LETM1 and EF-hand domain-containing protein 1, mitochondrial and	1.66832	0.325358	0.464355	0.448568	0.604662	0.257671	0.232145	0.966941	0.424872	0.2375	0.208541	0.279148	0.550266	0.325313	0.28144	0.294922	0.360848	0.603523	0.206147	0.468408
IPI00022774.3	VCP	Transitional endoplasmic reticulum ATPase	102.359	110.247	100.045	125.157	140.351	90.6101	116.509	106.751	97.6738	109.912	68.7029	66.6901	106.028	97.8364	88.9794	0.0273562	0.243591	0.901922	0.0249396	0.740689
IPI00967583.1	CRMP1	Uncharacterized protein	0.218166	0.245178	0.436514	0.220844	0.267164	0.463969	0.0734039	0.125965	0.252473	0.498788	0.392836	0.197798	0.280389	0.277739	0.197196	0.986283	0.957218	1.01926	0.881171	0.969803
IPI00922213.2	FN1	cDNA FLJ53292, highly similar to Homo sapiens fibronectin 1 (FN1), transcript variant 5, mRNA to	0.24738	3.43926	1.39136	0.35936	0.973464	0.700569	1.50964	3.14858	0.189951	1.03218	0.880808	0.23342	0.275018	0.329991	2.10424	0.678896	0.965789	1.02653	0.471746	0.596409
IPI01014376.1	CPSF7	Uncharacterized protein	0.141552	0.191246	0.251495	1.04645	0.435275	0.736879	0.307445	0.408102	0.319171	0.315585	0.275457	0.238771	0.352795	0.357769	0.235386	0.657026	0.982511	1.01024	0.509003	0.70676
IPI00927458.1	RPL32	Uncharacterized protein	1.93	1.32777	0.6685	1.92973	2.27868	1.28726	1.94248	1.52414	1.6245	1.24436	1.26295	1.77068	1.72883	2.33999	2.56899	0.431378	0.754205	0.937068	0.428338	1.18891
IPI00910176.1	UBE2K	cDNA FLJ57995, moderately similar to Ubiquitin-conjugating enzyme E2-25 kDa to	0.833064	1.56482	0.549008	1.41088	1.82589	0.971038	0.562412	0.512918	1.52193	0.430564	1.74775	0.434793	0.158022	0.731282	0.349363	0.274446	0.199753	0.646681	0.172551	0.553266
IPI00383581.4	GANAB	cDNA FLJ61290, highly similar to Neutral alpha-glucosidase AB to	57.0478	34.7322	50.5767	39.5828	41.3009	43.9929	39.5307	36.7533	39.0784	45.5822	47.4094	28.6289	39.8139	34.0127	26.758	0.178819	0.436124	0.918013	0.130053	0.791178
IPI00171527.10	MAPK1IP1L	MAPK-interacting and spindle-stabilizing protein-like	0.425255	0.123827	0.745252	0.398983	0.576543	0.389852	0.922934	0.159287	0.740104	0.287812	0.193071	0.19582	0.317142	0.440465	0.229442	0.316197	0.801413	1.10139	0.169337	0.606178
IPI00893184.1	DPY30	9 kDa protein	0.429908	0.373764	0.439428	0.204717	0.796364	0.85051	0.379639	0.210735	0.647881	0.313927	0.742365	0.446955	0.125591	0.215985	0.15301	0.637335	0.840188	1.07063	0.479953	0.750343
IPI01013273.1	CCT6A	cDNA, FLJ79129, highly similar to T-complex protein 1 subunit zeta to	15.8664	17.0193	20.393	22.5804	20.7006	17.2497	19.0709	16.5035	22.9115	18.7303	16.593	12.3172	22.4945	17.4227	7.09302	0.235881	0.807979	0.978316	0.202818	0.786254
IPI00647246.1	ISG20	Isoform 1 of Interferon-stimulated gene 20 kDa protein gene	0.260057	0.22597	0.230398	0.721014	0.208584	0.214017	0.179431	0.267739	0.327871	0.293188	0.659571	0.486193	0.32439	0.459425	0.165718	0.34777	0.509791	0.778997	0.504859	1.27294
IPI00549307.3	MOSC1	Isoform 3 of MOSC domain-containing protein 1, mitochondrial domain-containing	0.179157	0.324412	0.137366	0.858268	0.166928	0.451219	0.167636	0.19195	0.412167	0.28	0.353137	0.29078	0.196813	0.394774	0.364124	0.965234	0.832195	0.902072	0.928194	0.960085
IPI00216393.1	CLTA	Isoform Non-brain of Clathrin light chain A light	2.80228	1.20164	3.20583	2.70663	3.49163	1.85202	2.80675	1.99515	4.6396	1.551	0.357273	1.31358	1.6867	3.28502	1.42662	0.264328	0.873672	0.957974	0.123504	0.601818
IPI00903112.1	LTF	cDNA FLJ36533 fis, clone TRACH2004428, high TRACH2004428,	0.279341	0.358141	0.127848	0.245893	0.209598	4.34032	0.653564	0.75054	0.515877	0.26589	0.300388	0.415638	0.403684	3.45767	0.225516	0.431681	0.236918	5.34573	0.316111	3.93415
IPI00456887.2	HNRNPUL2	Heterogeneous nuclear ribonucleoprotein U-like protein 2 protein	11.3743	7.36712	6.42457	11.9928	4.64571	10.3403	7.6375	6.54367	0.806474	4.29959	8.81769	8.7283	12.5952	9.92247	8.7398	0.155383	0.290591	0.708716	0.418037	1.16742
IPI00793443.2	IPO5	Isoform 1 of Importin-5	7.04402	18.6512	3.21763	2.25777	2.86672	3.57737	1.98247	4.6612	1.47366	5.87545	2.25558	0.703392	4.28412	2.58077	3.4345	0.290249	0.352734	0.516201	0.25106	0.389523
IPI00879709.3	C6	Complement component C6 precursor	0.180867	0.194548	0.2731	0.40279	0.526024	1.67842	0.335946	0.216344	0.277989	0.234962	1.71416	0.199893	0.392075	0.545027	0.523188	0.544242	0.463162	1.73943	0.254186	2.13928
IPI00027438.2	FLOT1	Flotillin-1	0.889706	0.341226	0.193084	0.272363	1.77732	1.19997	1.55563	1.49692	0.194575	1.42395	0.330495	2.49683	0.905195	1.43058	1.49392	0.341886	0.254399	1.69015	0.210279	1.91641
IPI00909890.1	FUS	cDNA FLJ58049, highly similar to RNA-binding protein FUS to	1.99875	1.67435	1.51677	1.40678	0.707107	1.9917	1.46003	2.28818	0.656788	0.467228	0.364174	1.31067	0.569671	2.57416	2.12771	0.981843	0.839197	0.93978	0.886358	0.951069
IPI00868973.1	PRRC1	Isoform 1 of Protein PRRC1 PRRC1	1.90369	1.14599	3.34267	2.50116	0.232419	0.351014	0.20222	3.25352	0.690877	6.25409	1.95775	1.36443	2.45598	0.375452	2.6277	0.929875	0.809122	1.17815	0.921361	0.962237
IPI00976899.1	RPL8	Uncharacterized protein	6.35503	4.9362	6.45627	13.7218	6.16884	7.56164	7.53078	6.92541	7.70877	6.77443	10.0652	9.09454	8.14435	8.58192	7.76561	0.532743	0.89257	0.969788	0.495288	1.15977
IPI00376481.6	CENPV	Isoform 3 of Centromere protein V protein	0.389582	0.262011	0.24579	0.124524	0.622567	0.168381	0.551755	0.20557	0.450188	0.208801	0.182833	0.721414	0.617025	0.223013	1.56049	0.256389	0.919417	0.963648	0.262553	2.00962
IPI00374563.3	AGRN	Agrin	1.23251	0.31864	0.551755	0.40402	0.27498	0.905069	0.554016	0.363796	0.137853	0.443252	0.155039	0.272079	0.33178	0.304138	0.326691	0.30776	0.736467	0.864151	0.189266	0.49956
IPI00012578.1	KPNA4	Importin subunit alpha-4	0.349339	0.62248	0.702855	1.08448	0.246917	0.662228	0.210093	0.124059	0.304012	0.467358	0.166628	0.148075	0.597868	0.224564	0.0867135	0.118767	0.202183	0.58806	0.0803739	0.407126
IPI00395775.6	PSPC1	Isoform 2 of Paraspeckle component 1 component	2.88686	1.85151	2.17739	2.53432	3.60026	2.42738	2.17317	1.88335	0.217186	0.428956	2.95447	1.75394	1.8533	4.56622	1.47795	0.167648	0.0688356	0.546349	0.894823	0.965944
IPI00013466.4	ASNA1	ATPase ASNA1	0.600985	0.126692	0.426111	0.247843	0.289172	0.323469	0.303675	0.237797	3.25555	0.791631	0.129148	0.148394	0.208917	0.655696	0.734635	0.364035	0.328515	2.9052	0.817395	1.11
IPI00922333.1	SMC1A	cDNA FLJ50250, highly similar to Structural maintenance of chromosome 1-like 1 protein to	0.231984	0.0841029	0.187492	0.166801	0.683067	0.475758	0.457391	0.343576	0.674411	0.33231	0.23622	0.37956	0.198127	0.159984	0.611108	0.310665	0.176418	1.68713	0.739319	1.17108
IPI00220648.5	PMVK	Phosphomevalonate kinase	0.504351	0.398044	0.554631	0.247054	0.206155	0.154813	0.320368	0.124421	0.297219	0.487948	0.13495	0.256957	0.248807	0.270725	0.0951996	0.131774	0.299175	0.724921	0.0581007	0.526971
IPI00029012.1	EIF3A	Eukaryotic translation initiation factor 3 subunit A 3	4.48435	3.98561	3.34707	2.13081	3.19187	2.16505	2.14995	2.23876	5.30701	1.45125	2.09522	1.41853	1.39474	3.54553	4.36052	0.519263	0.364425	0.776677	0.266496	0.747652
IPI00293539.4	CDH11	Isoform 2 of Cadherin-11	0.237303	0.0918358	0.143528	0.177157	0.536853	0.364755	0.27907	0.772122	0.219425	0.349412	2.24669	0.261775	0.291082	0.258082	0.451845	0.394356	0.23915	1.67256	0.30093	2.9574
IPI00642549.2	RAD23B	cDNA FLJ56531, highly similar to UV excision repair protein RAD23 homolog B to	5.21656	7.18257	5.09718	5.39865	8.08025	6.83528	3.68254	4.47101	1.23911	2.97915	2.89287	1.75516	4.12016	3.03838	6.97987	0.0957228	0.0702444	0.620079	0.0574019	0.606499
IPI01010177.1	PCYOX1	cDNA FLJ51879, highly similar to Prenylcysteine oxidase to	1.87839	0.863519	1.54157	0.269807	0.186003	1.44985	1.14409	1.97288	1.80751	0.90645	0.542953	2.14995	1.21782	1.09786	1.324	0.431966	0.237755	1.53626	0.475721	1.33619
IPI00645038.1	ITIH2	Uncharacterized protein	8.98987	8.7501	11.5691	9.8287	2.5713	7.26015	12.7224	6.44643	23.4953	8.08585	29.4848	11.3114	4.26132	7.30204	4.82022	0.749578	0.390779	1.39083	0.558094	1.37092
IPI00029267.1	SNRPB2	U2 small nuclear ribonucleoprotein B B	1.71345	1.00507	0.777384	1.01017	0.842764	1.1969	1.14377	1.46825	1.47877	0.206942	3.43831	1.3808	0.972722	1.1874	1.48514	0.302572	0.921815	1.02726	0.245813	1.58247
IPI00401259.1	=-	Putative coiled-coil-helix-coiled-coil-helix domain-containing protein CHCHD2P9, mitochondrial CHCHD2P9,	0.44178	0.648824	0.210166	0.255696	0.283084	0.474474	0.219258	0.670728	0.473127	0.44396	0.281616	0.450563	0.0897901	0.285547	0.523405	0.486374	0.43582	1.24027	0.714871	0.886587
IPI00021842.1	APOE	Apolipoprotein E	0.168381	0.349824	0.298582	0.271985	0.291587	2.37068	1.21622	1.66002	0.263724	2.02146	1.07661	1.54403	0.13814	2.73416	0.125573	0.0767016	0.0277431	5.45662	0.156696	4.07033
IPI00013122.1	CDC37	Hsp90 co-chaperone Cdc37	4.92936	8.85075	11.4669	7.56794	4.20061	10.4115	7.97122	5.20753	13.2783	5.41289	2.38254	0.224082	8.54926	9.69674	2.61679	0.264163	0.61765	1.14226	0.273585	0.634042
IPI00872952.1	UQCRH	Ubiquinol-cytochrome c reductase hinge protein, isoform CRA_c protein,	2.42991	2.46092	0.197688	0.189912	0.261975	0.25887	1.44834	0.349194	5.5439	1.49247	0.181017	0.303128	0.483538	2.74366	0.236007	0.583074	0.544928	1.64117	0.676045	0.712466
IPI00656071.1	TIMM50	Isoform 1 of Mitochondrial import inner membrane translocase subunit TIM50 import	0.19799	0.364654	0.667852	0.671705	0.305893	0.209424	0.279961	0.304962	0.392455	0.468396	0.21806	0.357868	0.577383	0.312581	0.212716	0.497533	0.343112	0.749605	0.397143	0.760207
IPI00916869.2	USP39	cDNA FLJ59519, highly similar to U4/U6.U5 tri-snRNP-associated protein 2 to	0.412624	0.461723	0.379034	0.990892	0.589597	0.116823	0.358091	0.809947	0.772389	0.129139	1.45609	1.45488	0.657198	0.294002	0.296581	0.346021	0.511624	0.771521	0.393524	1.46752
IPI00941900.1	CALU	Isoform 1 of Calumenin	3.30993	5.83123	6.229	6.8348	3.13051	11.9646	6.44419	4.47628	1.74376	8.16357	4.44937	6.92781	8.54986	6.37666	1.22816	0.716251	0.461834	1.29433	0.774549	1.08669
IPI00332371.9	PFKL	Isoform 1 of 6-phosphofructokinase, liver type liver	9.06056	12.1266	10.7786	9.07376	19.4919	11.9356	9.66587	13.5011	16.8153	12.3805	10.6686	11.6052	7.7996	11.8836	10.8551	0.502043	0.7492	1.06223	0.487804	0.872475
IPI01015916.1	RBM39	Uncharacterized protein	1.75285	2.62006	0.800237	1.20022	0.855299	1.8391	1.78361	0.390015	0.598864	2.57006	1.37879	0.355988	1.46846	1.62913	3.33943	0.930269	0.986348	0.993495	0.757809	1.13047
IPI00478003.3	A2M	Alpha-2-macroglobulin	68.6173	59.557	64.1332	65.2271	54.8569	117.972	109.304	86.8829	175.254	97.3966	166.226	92.4179	49.8665	64.5883	36.0443	0.0879217	0.0226025	1.87844	0.450229	1.30971
IPI00375149.4	OPA1	dynamin-like 120 kDa protein, mitochondrial isoform 2 mitochondrial	0.310938	0.188182	0.109136	0.286459	0.32019	0.282046	0.385606	0.283575	1.0487	0.303717	0.177957	0.155404	0.423109	0.19865	0.157661	0.178704	0.220623	1.89615	0.762272	0.915941
IPI00382436.1		Ig lambda chain V-III region SH region	1.28494	0.992886	0.291163	0.463198	0.117611	0.168965	0.178959	0.374906	0.191431	0.114205	0.475231	0.216629	0.209381	1.45862	0.197853	0.3035	0.125984	0.326518	0.726851	0.812023
IPI00384938.1	IGHV4-31	#REF!	1.69079	0.574947	0.782737	3.07929	1.64069	0.378483	0.104625	0.708382	1.64718	0.39631	2.69895	0.288371	0.105462	1.324	0.147696	0.318031	0.125404	0.416425	0.3651	0.587566
IPI00927538.1	TBL2	Uncharacterized protein	0.150716	0.136948	0.667297	0.241333	1.59438	0.414143	0.44513	0.855121	0.453822	0.907456	0.373169	0.146981	0.283693	0.347455	0.116524	0.32275	0.855204	1.10212	0.336227	0.454306
IPI00011913.1	HNRNPA0	Heterogeneous nuclear ribonucleoprotein A0	4.80921	2.99966	2.5788	3.66903	2.69391	2.00416	3.5603	3.07247	0.257367	3.74587	0.263559	2.9138	1.73015	2.78369	3.5883	0.377089	0.31823	0.75461	0.166497	0.673378
IPI00022429.3	ORM1	Alpha-1-acid glycoprotein 1	15.1905	35.1171	8.05509	44.6163	4.96915	73.5524	36.9423	17.2533	46.0203	28.2152	85.1775	17.0737	11.4637	31.4002	12.9592	0.483371	0.167205	1.87112	0.550218	1.46435
IPI00414980.2	MYO1B	Isoform 2 of Myosin-Ib	0.226064	0.14163	0.307978	0.182542	0.106225	0.204674	0.246404	0.0871292	0.313818	0.300826	0.498823	0.185604	0.273194	0.298706	0.207272	0.314776	0.504199	1.19536	0.173835	1.51757
IPI00646225.4	HLA-B	HLA class I histocompatibility antigen, A-31 alpha chain	0.146798	0.236252	0.169811	0.17155	0.359185	2.1685	0.319303	0.309412	0.443007	0.167137	0.12546	0.205798	0.145018	0.315213	0.223446	0.25002	0.283091	3.1445	0.795025	0.936636
IPI00219617.5	PRPS2	Isoform 1 of Ribose-phosphate pyrophosphokinase 2 pyrophosphokinase	0.241618	0.986233	0.193271	0.380403	0.249913	0.243602	0.159596	0.158099	0.228965	0.356087	1.03068	0.317384	0.170282	1.03297	0.275095	0.280118	0.292003	0.558803	0.540872	1.37777
IPI00385294.5	C1S	Uncharacterized protein	0.144206	0.341818	0.435637	0.433559	0.420536	0.254617	0.207445	0.146899	0.382969	0.284283	1.44944	0.164345	0.257599	0.596213	0.321012	0.335649	0.1845	0.718687	0.442963	1.57038
IPI00744575.3	USP9Y	Isoform Short of Probable ubiquitin carboxyl-terminal hydrolase FAF-Y ubiquitin	0.370668	0.833353	0.354363	0.240049	0.310271	0.25059	0.293392	0.0896098	0.590701	0.260219	0.182694	0.247226	0.287553	0.210355	0.38716	0.363391	0.377717	0.703992	0.213994	0.6236
IPI00795292.1	NME1	Isoform 3 of Nucleoside diphosphate kinase B	11.9671	15.8939	13.1346	19.2195	21.6366	12.5725	14.9171	13.7399	11.6245	15.0553	18.3257	15.7066	12.6135	15.0063	10.0959	0.366573	0.208238	0.829664	0.405426	0.876563
IPI00012048.1	NME1	Isoform 1 of Nucleoside diphosphate kinase A	0.212893	0.274143	0.33981	0.214537	0.414804	0.215461	0.14165	0.246012	0.832949	0.219395	0.161253	0.236498	1.88688	1.23234	0.207373	0.293155	0.776203	1.13685	0.263915	2.5576
IPI01014074.1	PPP2R1A	cDNA FLJ53296, highly similar to Serine/threonine-protein phosphatase 2A 65 kDa regulatory subunit A alpha isoform to	17.9785	12.342	5.84377	14.8408	16.4555	21.9401	9.23748	13.824	30.3789	15.0188	5.87423	8.61709	13.5789	8.16131	10.217	0.091645	0.32008	1.34003	0.137167	0.688529
IPI00604652.1	NAE1	NEDD8-activating enzyme E1 regulatory subunit isoform c subunit	0.171776	1.26042	0.59791	0.251338	0.270106	0.741336	0.383182	0.497752	0.65556	0.667065	0.3537	0.11596	0.191631	0.711877	0.232081	0.389543	0.725619	1.15416	0.436137	0.629128
IPI00909399.2	PEPD	xaa-Pro dipeptidase isoform 3	0.26977	1.56417	0.305089	0.274809	0.585321	0.986438	1.65439	0.16687	0.398817	2.69895	1.54467	0.683352	0.104458	0.604662	1.38348	0.496751	0.306579	1.96904	0.487915	1.44061
IPI00005613.3	U2AF1	Splicing factor U2AF 35 kDa subunit kDa	5.40727	4.97225	3.27433	4.84333	3.42879	0.66099	3.84824	5.58091	0.346878	3.96082	0.708284	23.6456	3.2578	2.01266	3.98478	0.575614	0.227669	0.656657	0.61433	1.53285
IPI00807498.1	CCDC6	CCDC6 protein (Fragment)	0.134065	0.235044	0.155609	0.516557	0.186649	0.396392	0.432478	0.170152	0.345032	0.547792	0.278858	0.408045	0.270013	0.286499	0.284855	0.280292	0.192871	1.54069	0.455856	1.2446
IPI00246975.8	GSTM3	Glutathione S-transferase Mu 3	1.32271	0.583417	0.200267	0.368312	0.160184	0.224393	0.185	0.184169	0.39107	0.264511	0.48083	0.581157	0.319237	0.461499	0.237122	0.346518	0.264611	0.474077	0.638434	0.789347
IPI00552419.3	PCCA	propionyl-CoA carboxylase alpha chain, mitochondrial isoform c precursor mitochondrial	0.224502	0.512527	0.44615	0.503897	0.165488	0.179133	0.168942	0.141023	0.283614	0.199616	0.192389	0.18683	0.159718	0.114467	0.562568	0.180305	0.0725785	0.524855	0.277414	0.656373
IPI00295857.7	COPA	Isoform 1 of Coatomer subunit alpha subunit	13.532	10.513	12.7471	12.5899	17.7125	12.1358	8.69267	9.84165	13.3475	14.1105	13.1473	14.3801	13.193	9.98595	10.1092	0.480156	0.28664	0.866362	0.42327	0.906416
IPI00902582.1	=-	cDNA FLJ44510 fis, clone UTERU3001652, highly similar to Leiomodin-1 UTERU3001652,	0.386945	0.130661	0.486631	0.432748	0.284224	0.793609	0.640913	0.235974	0.219516	0.356185	1.72071	0.244923	0.250052	0.849744	0.377356	0.405572	0.451244	1.30501	0.291987	2.00021
IPI00029264.4	CYC1	Cytochrome c1, heme protein, mitochondrial mitochondrial	0.281694	1.46652	2.44172	1.96905	1.51225	0.32168	0.162487	0.174863	1.63082	1.03922	2.26577	0.584915	0.696357	0.216524	0.163765	0.200754	0.0986314	0.433968	0.192642	0.511955
IPI00879002.1	TTLL12	Uncharacterized protein	2.60268	1.58755	3.31016	2.82921	0.376468	3.12033	1.97342	2.1385	3.83785	3.36685	2.32334	1.1897	1.32235	3.4395	0.260219	0.255266	0.277723	1.34848	0.580463	0.797222
IPI00876958.2	TAP1	Uncharacterized	0.115439	0.378982	0.224642	0.748358	0.674177	0.204575	0.303275	0.299598	0.163402	0.577303	0.281655	0.787417	0.213721	2.4977	0.3169	0.385632	0.436135	0.722896	0.426281	1.91324
IPI00644712.4	XRCC6	X-ray repair cross-co	43.9016	39.5224	47.3634	41.4356	45.1233	41.496	39.8636	32.5684	42.7247	40.2216	44.2253	28.0942	47.7292	36.9397	31.3002	0.280503	0.107973	0.90581	0.202027	0.866307
IPI00006362.1	EDF1	Isoform 2 of Endothelial differentiation-related factor 1 differentiation-related	0.187622	0.046186	0.150841	0.886136	0.267906	0.204717	0.245467	0.695441	0.559147	0.683541	0.459043	0.264438	0.141042	0.232967	0.164254	0.355076	0.382645	1.55217	0.741766	0.820011
IPI00221222.7	SUB1	Activated RNA polymerase II transcriptional coactivator p15	6.96489	4.49961	7.89205	9.11094	7.86911	4.86554	4.12759	6.24846	9.57186	6.31289	10.7876	9.39895	2.37957	6.98568	4.77268	0.806507	0.415656	0.856611	0.821477	0.944625
IPI00549343.3	VAMP3	Vesicle-associated membrane protein 3	1.05292	1.07356	1.4572	1.71677	1.45468	2.30266	2.10906	1.40786	1.96564	1.23988	1.69373	1.29783	2.1057	1.52774	1.54414	0.168823	0.10408	1.33603	0.163781	1.20932
IPI00967259.1	GNPDA1	Uncharacterized protein	0.11946	0.420011	0.229935	0.352966	0.26376	0.151659	0.281245	0.172779	0.227368	0.250538	0.190215	0.175848	0.135438	0.227731	0.379402	0.528144	0.331766	0.781735	0.430197	0.799803
IPI00000861.1	LASP1	Isoform 1 of LIM and SH3 domain protein 1 and	2.40844	2.62315	2.25027	2.34161	3.07908	2.14771	2.35692	1.75747	1.53103	0.334459	0.385045	2.4375	2.15891	2.66623	1.10451	0.152889	0.0592341	0.639838	0.146142	0.689009
IPI00014151.3	PSMD6	26S proteasome non-ATPase regulatory subunit 6 subunit	0.818186	0.177735	1.29468	0.813774	0.179506	1.18353	0.58976	1.04522	1.70279	0.711433	0.492911	0.449533	0.528729	0.683446	0.215088	0.0970374	0.216472	1.59346	0.45705	0.721617
IPI01026568.1	CFL2	17 kDa protein	0.0950678	0.171146	0.278066	0.315432	0.188927	1.9363	0.236154	0.564521	0.542765	0.284283	0.262739	0.269433	0.658292	0.449814	0.210822	0.197321	0.183766	3.39871	0.132259	1.76524
IPI00937239.2	RPS21	40S ribosomal protein S21	1.90964	1.91481	1.18583	1.12008	1.22646	1.7411	1.28877	1.46947	0.339363	2.13184	2.88546	3.0007	2.33804	1.86982	0.99323	0.131604	0.831924	0.947496	0.119424	1.50707
IPI00219742.1	CTNND1	Isoform 3 of Catenin delta-1 delta-1	12.1131	4.31572	12.4848	8.47022	21.8506	2.80422	5.13015	6.7323	9.1394	8.44384	3.60775	8.96995	11.192	0.644521	5.03573	0.129044	0.142024	0.544445	0.129865	0.497177
IPI00921826.1	CHCHD3	cDNA FLJ53726, highly similar to Coiled-coil-helix-coiled-coil-helixdomain-containing protein 3 to	1.2713	0.60036	0.657654	1.10911	1.08968	0.320834	0.342316	0.291264	1.09407	0.394063	0.796585	0.153233	0.820912	0.903565	0.944027	0.121398	0.0544569	0.516602	0.292932	0.765281
IPI00909424.1	cDNA FLJ57958	highly similar to NADH dehydrogenase (ubiquinone) 1 alpha subcomplex subunit 13	7.39731	0.131825	0.0903833	0.308833	0.942001	2.04926	2.23009	2.3561	0.49865	1.40698	0.529316	0.255235	1.0805	3.08122	2.0757	0.952559	0.965855	0.962879	0.815887	0.791623
IPI00000792.1	CRYZ	Quinone oxidoreductase	7.56269	15.2771	12.8973	10.7846	9.03422	9.68868	8.08361	11.3648	5.97194	4.55011	8.08922	8.29016	8.37622	8.27294	11.3255	0.162057	0.122758	0.713859	0.190365	0.798367
IPI01018333.1	HDGFRP2	Isoform 1 of Hepatoma-derived growth factor-related protein 2 growth	0.465193	0.293677	0.390015	0.503408	0.448662	0.564404	0.309283	0.294247	0.187206	0.245586	0.315519	0.354289	0.23699	0.387079	0.454137	0.345882	0.224365	0.761905	0.207053	0.83201
IPI00016605.3	C1orf123	UPF0587 protein C1orf123	0.178414	0.226911	0.30093	0.189964	0.264511	0.893166	0.243282	0.458756	0.452472	0.242541	0.144286	0.181495	0.295924	0.274352	0.321368	0.0834064	0.130151	1.97308	0.791047	1.04884
IPI00917777.1	EFTUD2	116 kDa U5 small nuclear ribonucleoprotein component isoform b nuclear	3.75132	1.39445	3.06609	3.08143	2.58435	1.49703	3.15426	2.71622	1.20949	3.15929	1.24375	2.10322	3.2259	1.87488	2.92249	0.628413	0.475354	0.845697	0.373272	0.819321
IPI00551024.5	DAK	Bifunctional ATP-dependent dihydroxyacetone kinase/FAD-AMP lyase (cyclizing) lyase	2.02357	2.30585	1.97206	2.97193	8.573	1.78893	1.91017	2.80967	2.29104	1.31412	3.87232	3.33966	2.6898	1.38271	0.914275	0.406569	0.291679	0.566721	0.448062	0.683542
IPI01014435.1	RAP1B	cDNA FLJ51696, highly similar to Ras-related protein Rap-1b to	14.4932	0.116081	6.14537	0.233436	9.60776	9.54536	8.38436	7.72214	21.0172	12.2882	30.1712	5.24594	14.438	5.97443	1.83401	0.481485	0.162872	1.92697	0.385889	1.88469
IPI00008580.1	SLPI	Antileukoproteinase	0.138475	0.183239	0.226487	0.527265	1.01854	0.37162	0.424578	0.696454	0.339645	0.280739	0.251844	0.862203	0.182239	1.08125	0.542916	0.660799	0.983866	1.00909	0.508481	1.39467
IPI00743859.3	CTNNA2	Isoform 2 of Catenin alpha-2 alpha-2	2.38932	2.07369	3.94602	2.32769	0.455935	3.52837	1.41167	3.2297	6.46836	4.38142	0.765461	0.587109	4.04097	1.49609	1.09225	0.100695	0.1588	1.69928	0.466702	0.713135
IPI00337541.3	NNT	NAD(P) transhydrogenase, mitochondrial	2.38171	2.68235	4.72397	5.11417	6.50703	2.54101	3.12509	4.9181	4.02447	5.10248	4.12044	11.2496	3.63209	2.24934	5.19203	0.649836	0.723353	0.920684	0.585425	1.23514
IPI00910164.1	SLC16A1	cDNA FLJ53381, highly similar to Monocarboxylate transporter 1 to	0.136569	0.962795	1.20514	0.477973	1.39474	0.356482	1.1778	0.948421	0.525004	0.191657	0.383447	0.23035	0.358563	0.525769	0.217442	0.175241	0.529286	0.765909	0.101459	0.410697
IPI00008454.1	DNAJB11	DnaJ homolog subfamily B member 11 member	0.568606	0.884111	0.794545	0.118767	0.366555	0.201982	1.15461	1.29361	0.199284	0.411168	0.703928	0.174307	1.09149	0.698049	0.127556	0.913053	0.714008	1.19325	0.957736	1.02296
IPI00015475.3	SLC1A1	Excitatory amino acid transporter 3 3	0.538493	0.215715	0.122725	0.227557	0.653247	0.193607	0.332079	0.160206	3.8998	0.832949	0.269863	0.213395	0.249688	0.19283	0.519034	0.358895	0.365545	3.08274	0.61595	0.821972
IPI00005719.1	RAB1A	Isoform 1 of Ras-related protein Rab-1A protein	0.29181	1.81164	0.518746	0.283752	0.567897	0.511711	0.672171	0.121641	0.305194	2.24047	0.237961	0.502362	0.670728	2.26106	0.285765	0.979057	0.877842	1.10862	0.842808	1.13934
IPI00894205.2	NIPSNAP1	protein NipSnap homolog 1 isoform 2 isoform	0.503897	0.770304	0.0920716	1.23859	1.5645	0.226833	0.231759	0.850923	0.268334	0.858089	0.178117	0.230063	0.213573	0.348879	0.167079	0.0860693	0.290638	0.584247	0.080351	0.272874
IPI00056334.6	PRKCDBP	Protein kinase C delta-binding protein protein	0.226581	0.426583	0.220263	0.35916	0.337276	0.335783	0.373298	0.247208	0.195318	0.486732	0.11727	0.110898	1.73135	0.227053	0.185746	0.798152	0.837376	1.04362	0.638995	1.51116
IPI00910350.1	MAPRE1	cDNA FLJ52068, highly similar to Microtubule-associated protein RP/EB family member 1 to	0.488524	2.30042	0.245961	0.319547	0.358539	0.137481	0.295207	0.296171	0.282006	0.55122	0.186429	0.289734	1.80475	0.157443	0.184373	0.600347	0.336478	0.420708	0.678398	0.706365
IPI01021273.1	METTL7A	Uncharacterized protein	2.21899	1.75431	1.27068	3.03669	3.98948	2.46246	2.30266	0.121683	4.22983	2.1652	6.12921	4.20761	2.70101	1.88923	3.1729	0.291781	0.81404	0.919454	0.225014	1.47512
IPI00010105.1	EIF6	Eukaryotic translation initiation factor 6 6	0.0762616	1.59472	1.48741	0.485284	1.56765	1.22697	1.68436	2.64543	0.727289	0.40187	0.327598	0.176202	0.278896	1.65107	0.152227	0.25486	0.576481	1.28296	0.254396	0.496226
IPI00220063.5	NDUFS5	NADH dehydrogenase [ubiquinone] iron-sulfu	0.391369	0.315869	0.0964951	0.363443	0.274847	0.338376	0.464806	0.385019	0.414775	0.457423	0.131561	0.240249	0.192629	0.375426	0.15283	0.0190029	0.0766722	1.42882	0.333125	0.757751
IPI01026420.1	DNAJC10	Uncharacterized protein	1.09847	0.498581	0.254053	0.441443	0.354461	0.210954	0.218575	0.44714	0.493698	0.271552	0.256566	0.380008	0.217924	0.428599	0.130679	0.20426	0.260919	0.620292	0.178097	0.534102
IPI00967467.1	TPM3	33 kDa protein	0.210881	0.113503	0.31421	4.77632	0.336785	2.5516	2.09275	0.298024	3.00257	2.62388	0.252263	2.14622	3.74665	4.27789	2.36641	0.394737	0.38318	1.83751	0.257131	2.22359
IPI01015980.1	GLTP	Uncharacterized protein	0.961261	1.85099	1.74727	1.36311	1.34211	1.41902	1.12187	1.31942	1.17903	0.384352	0.153765	1.00856	1.47898	0.432359	1.36462	0.182574	0.167883	0.746577	0.107222	0.610935
IPI00848298.1	APOA1BP	Isoform 2 of Apolipoprotein A-I-binding protein A-I-binding	2.41162	2.29835	1.6441	3.12683	3.22254	1.42751	2.50273	4.25837	0.400202	2.46673	0.272684	2.51141	1.39059	0.353113	3.06354	0.394116	0.657582	0.870279	0.15682	0.597582
IPI00020091.1	ORM2	Alpha-1-acid glycoprotein 2	2.88166	4.7171	1.80776	6.30939	0.53559	6.7627	3.84318	2.09812	6.14707	2.15248	6.56275	1.39445	0.812365	5.01101	0.312061	0.666053	0.521505	1.29241	0.796383	0.867159
IPI00940148.1	GDI2	Rab GDP dissociation inhibitor beta beta	40.2161	30.19	32.0688	31.1638	35.6715	32.8313	40.4761	32.6588	60.0795	41.7615	46.5917	31.5529	38.2424	32.5684	26.518	0.313455	0.207173	1.22738	0.761693	1.0364
IPI01022921.1	TWF1	Uncharacterized protein	0.763871	0.635868	2.1848	0.558063	0.324098	1.29298	1.61172	2.11991	2.42301	2.15338	0.133517	1.81479	2.42167	0.34871	0.458884	0.116083	0.034877	2.14946	0.807513	1.15915
IPI00220642.7	YWHAG	41701 protein gamma	23.367	14.7864	20.8865	27.2239	15.9314	21.9599	15.3493	15.806	16.3736	16.7641	12.2109	6.21821	24.9696	21.4365	9.16859	0.331398	0.267138	0.844001	0.230382	0.724142
IPI00413324.6	RPL17	60S ribosomal protein L17	5.26999	6.55638	7.00847	5.64941	8.82013	6.65851	7.77962	7.27527	7.34723	7.63062	8.17433	0.174585	7.32587	3.93101	4.49244	0.165045	0.348577	1.10169	0.282377	0.723575
IPI00815770.2	SNX3	Isoform 1 of Sorting nexin-3 nexin-3	1.73424	0.152428	0.848331	1.1837	1.65451	0.948882	0.664573	0.333394	0.812872	0.522753	1.26523	0.895087	1.43744	1.20664	0.888781	0.169047	0.197244	0.588975	0.941047	1.02153
IPI00465294.2	CDC5L	Cell division cycle 5-like protein protein	0.212171	0.146047	0.32466	0.378168	0.279302	0.145693	0.396282	0.253244	0.642336	0.822963	0.316461	0.225094	0.241233	0.364907	0.213543	0.201655	0.221027	1.68652	0.93607	1.01559
IPI00549761.3	ALG1	Chitobiosyldiphosphodolichol beta-mannosyltransferase	0.188339	0.155955	0.268706	0.257225	0.548818	0.215014	0.198155	0.490832	0.227652	0.120993	0.388423	0.485485	0.285785	0.19725	0.17248	0.829108	0.731796	0.88274	0.81463	1.07779
IPI00827813.1	DYNC1I2	Isoform 2F of Cytoplasmic dynein 1 intermediate chain 2 dynein	1.48082	0.997854	0.970029	0.634416	0.439855	1.29003	1.31713	1.09361	1.33756	1.04232	0.173704	0.122063	1.97589	1.38915	0.296314	0.464146	0.159756	1.34439	0.795388	0.874892
IPI00256684.2	AP2A1	Isoform B of AP-2 complex subunit alpha-1 complex	5.57472	2.29008	5.08659	4.16351	0.575505	4.26989	6.25929	2.95468	6.69043	6.62996	6.08729	2.07139	4.78162	9.87034	8.84155	0.210899	0.166599	1.51519	0.141584	1.78923
IPI00012442.1	G3BP1	Ras GTPase-activat	1.41549	1.69021	1.42959	2.22453	0.603782	1.48638	2.80286	2.09115	1.73929	1.62349	2.87468	3.44953	1.00361	1.01129	2.32479	0.414581	0.214388	1.32315	0.280902	1.44819
IPI01021088.1	C4A	Uncharacterized protein	19.867	17.7445	15.8763	44.3358	4.47008	56.3327	26.9292	34.1378	78.0215	13.6658	71.3479	44.5823	11.7639	19.9263	11.7786	0.358128	0.152052	2.04399	0.421063	1.55825
IPI00306960.3	NARS	Asparaginyl-tRNA synthetase, cytoplasmic	2.65903	3.56969	4.39907	2.88966	5.27547	3.54651	4.36778	2.78929	6.31551	4.23952	8.60992	4.44752	2.67901	3.38722	3.35102	0.786078	0.5364	1.1312	0.554664	1.19591
IPI00012074.3	HNRNPR	Isoform 1 of Heterogeneous nuclear ribonucleoprotein nuclear	35.0344	33.3728	24.7387	31.6778	29.9898	25.8161	23.7754	25.0858	26.5935	27.3108	12.8118	20.5206	25.9849	28.1624	32.2449	0.108009	0.0383432	0.830558	0.114013	0.773347
IPI00028946.2	RTN3	Isoform 3 of Reticulon-3	0.184642	0.142853	0.774856	2.68943	1.91653	0.63534	0.961061	0.152386	0.821994	0.770251	0.354412	0.161197	0.258279	1.36207	0.568566	0.415909	0.408567	0.585292	0.318134	0.473787
IPI01009610.1	ISYNA1	cDNA FLJ57998, highly similar to Homo sapiens myo-inositol 1-phosphate synthase A1 (ISYNA1), mRNA to	0.162702	0.15629	0.377226	0.397217	0.12197	0.237122	0.472865	0.453634	0.366682	0.393218	0.490254	0.145996	0.16347	0.124473	0.216374	0.143733	0.0906999	1.58262	0.871685	0.938425
IPI00788612.2	LIMS1	LIM and senescent cell antigen-like-conta antigen-like-conta	0.338893	0.157978	0.296623	0.350965	1.65496	0.465193	0.192523	0.299556	0.337299	0.549846	0.317692	0.0860012	1.06992	0.182555	0.184322	0.727695	0.533405	0.658856	0.578615	0.657452
IPI00473085.3	DNM1L	Isoform 3 of Dynamin-1-like protein protein	0.672124	0.357149	0.39998	0.276816	0.528033	0.787908	0.366326	0.393354	0.989794	0.502536	1.25379	0.934781	0.368006	0.348831	0.665311	0.363374	0.290025	1.36069	0.207373	1.59828
IPI00219155.5	RPL27	60S ribosomal protein L27	4.80321	8.62306	3.13334	1.18279	7.57004	4.91265	5.62129	5.00164	6.72531	4.18579	5.55082	5.58943	4.67187	5.01691	4.84635	0.981091	0.88122	1.04481	0.960699	1.01434
IPI01015447.1	SRSF4	Uncharacterized protein	2.2885	2.76312	2.1604	3.97595	2.85462	3.66776	2.49839	2.52801	0.455051	1.95233	3.73653	2.89809	4.66701	2.37561	3.01927	0.213067	0.370814	0.790562	0.329789	1.18899
IPI01014744.1	MGST1	Uncharacterized protein	2.23861	0.822792	1.54039	1.74799	6.5673	1.18945	2.91036	1.50462	3.27229	0.22597	8.49845	4.41833	0.157334	3.5389	5.73185	0.218881	0.536505	0.704702	0.303474	1.72987
IPI00020194.1	TAF15	Isoform Short of TATA-binding protein-associated factor 2N protein-associated	5.57009	5.5274	4.43951	4.74103	2.33448	3.28251	1.96564	4.33821	2.78041	2.8483	4.36052	2.27695	7.36303	3.55734	3.19297	0.280489	0.0746592	0.672861	0.733526	0.91767
IPI00941110.2	SUN2	cDNA FLJ59542, highly similar to Sad1/unc-84-like protein 2 to	0.319724	0.114586	0.185103	0.221764	0.347769	0.297055	0.532886	0.420506	0.598822	0.258135	0.212554	3.15973	1.63773	0.174367	0.342719	0.203215	0.0521914	1.7725	0.209851	4.64874
IPI00063130.2	TMEM205	Transmembrane protein 205	0.0561683	0.976709	0.418471	0.311434	1.807	0.218802	1.56949	1.91361	2.6119	1.8428	0.153499	1.75418	0.489439	0.165374	0.994953	0.127157	0.106688	2.2849	0.995606	0.996544
IPI01021487.1	PPP1R12A	protein phosphatase 1 regulatory subunit 12A isoform b subunit	0.226189	0.0957224	0.34441	0.383979	0.13836	0.474901	0.278684	0.321458	0.541825	0.374698	0.269639	0.30736	0.249654	0.454232	0.190017	0.11023	0.0631301	1.67547	0.453618	1.23744
IPI00300371.5	SF3B3	Isoform 1 of Splicing factor 3B subunit 3 factor	5.11701	2.20519	4.064	2.52871	4.54317	2.35137	2.32028	2.18495	8.1664	4.74728	1.42514	4.70861	1.92853	3.00778	2.17754	0.507714	0.845517	1.07109	0.233348	0.717713
IPI01018834.1	MACF1	Uncharacterized protein	0.133231	0.313492	0.197757	0.39061	0.359235	0.458788	0.30619	0.227179	0.693323	0.702904	0.190254	0.368414	0.342743	0.492126	0.112344	0.157147	0.118842	1.71293	0.796101	1.08001
IPI00719549.2	RBM14	RBM14-RBM4 protein isoform 1	0.300492	0.328371	0.166917	0.43161	0.176067	0.221135	0.344577	0.484074	0.554016	0.345295	0.44359	0.108375	0.398873	0.418587	0.287055	0.424188	0.193556	1.38878	0.542037	1.18029
IPI00181283.2	PLCB3	1-phosphatidylinositol-4,5-bisphosphate phosphodiesterase beta-3 isoform 2 2	0.237056	0.198402	0.379586	0.373402	0.0239306	0.202571	0.639537	0.617452	0.437726	0.180879	0.172014	0.168113	0.16738	0.109606	0.164493	0.0548609	0.185167	1.71413	0.260886	0.644689
IPI00303318.2	FAM49B	FAM49B Protein FAM49B	0.556595	0.281557	0.542765	0.365869	0.432958	0.720215	1.04117	1.15205	1.89882	0.389852	1.11798	0.349194	1.74751	0.784367	0.907016	0.100474	0.0738714	2.38656	0.0749176	2.25075
IPI00967533.1	TMEM33	Uncharacterized protein	0.416301	0.470022	0.376025	0.193164	1.56017	0.667482	0.858208	0.778895	0.374724	0.595016	0.326126	0.375166	0.337206	0.522282	0.234165	0.366481	0.848877	1.08577	0.377411	0.595204
IPI00216293.6	TST	Thiosulfate sulfurtransferase	2.0668	3.59776	6.0285	4.23922	8.50375	1.83401	2.6257	3.53669	5.79497	4.84333	4.98882	4.40793	5.0183	3.78528	3.66598	0.587096	0.408602	0.76259	0.67324	0.894839
IPI00964686.1	HNRNPAB	Uncharacterized protein	14.4932	12.638	8.86487	9.40612	6.62766	7.6603	8.43449	9.513	7.62058	2.11052	7.98726	6.31332	7.08418	7.97287	5.29415	0.0883053	0.117738	0.679204	0.0669035	0.665998
IPI00982553.1	CD44	20 kDa protein	5.30996	2.28992	4.5046	4.23952	2.422	3.20273	5.91673	1.78287	4.21052	2.88466	7.44515	6.20917	4.4119	3.72825	3.23777	0.330117	0.871263	0.959048	0.24422	1.33391
IPI00021924.1	H1FX	Histone H1x	3.85572	4.05331	5.38483	9.53214	7.33858	7.02306	1.35707	5.10744	5.21512	2.86731	5.63846	8.90737	7.29901	2.54471	12.0353	0.2762	0.273175	0.715078	0.534211	1.20754
IPI01010035.1	COPS2	cDNA FLJ52928, highly similar to COP9 signalosome complex subunit 2 to	0.193338	0.342008	0.190333	0.424019	0.549922	0.488761	0.257528	0.308234	0.665311	0.511427	0.348904	0.108172	0.709217	0.157968	0.345534	0.584867	0.323041	1.3128	0.963622	0.982452
IPI00219029.3	GOT1	Aspartate aminotransferase, cytoplasmic	2.56561	8.13533	7.73553	5.36843	3.84211	2.81747	0.118323	5.94674	4.8706	6.50929	2.38105	5.36025	5.66352	6.40767	4.39542	0.594191	0.380508	0.732898	0.609135	0.875607
IPI00797148.1	HNRNPA1	Isoform 2 of Heterogeneous nuclear ribonucleoprotein A1 nuclear	34.3753	47.1309	58.4001	48.5097	29.9088	39.4513	33.9091	42.9474	53.6795	34.5664	41.0582	23.0725	40.4986	56.953	29.6467	0.744071	0.673512	0.936924	0.503443	0.875892
IPI00873926.1	CAPRIN1	Isoform 2 of Caprin-1	1.51236	2.82138	2.04401	4.76904	2.53415	3.38417	3.42357	1.65818	3.28684	2.34567	2.34339	3.55537	4.38446	3.19873	3.28524	0.552376	0.902562	1.03052	0.372561	1.22559
IPI00759824.2	ANP32B	Isoform 2 of Acidic leucine-rich nuclear phosphoprotein 32 family member B leucine-rich	2.22515	2.30825	0.296417	1.50129	5.32728	2.56099	2.32882	2.42805	3.28206	3.26685	4.62002	3.98147	2.52731	1.94774	4.68711	0.365335	0.630514	1.18942	0.262186	1.52368
IPI00006211.4	VAPB	Isoform 1 of Vesicle-associated membrane protein-associated protein B/C membrane	0.745924	0.506242	0.166351	0.647387	0.234101	0.182453	1.26251	0.169411	0.303191	0.737901	0.211217	0.096904	0.196282	0.459297	0.193714	0.331068	0.775527	1.15455	0.124356	0.503223
IPI00011253.3	RPS3	40S ribosomal p	26.2801	18.1525	16.9252	21.8158	24.725	19.3465	18.3715	18.2055	22.9004	14.2225	23.5769	18.0197	15.3132	27.2446	16.3747	0.546375	0.231051	0.862349	0.627206	0.931699
IPI00045051.3	PURB	Transcriptional activator protein Pur-beta	0.400341	0.271383	0.269377	0.145199	0.58447	0.323245	0.287872	0.469664	0.378588	0.259751	0.2863	0.196527	0.155858	0.155361	0.187401	0.105848	0.911372	1.02894	0.140458	0.587422
IPI00921523.1	CFB	Isoform 1 of Complement factor B (Fragment)	1.46206	2.91743	0.239351	8.84278	0.475264	13.5179	6.74117	0.74841	35.0295	9.70346	35.3442	8.13645	0.309326	8.75556	1.15958	0.353271	0.153631	4.71701	0.286772	3.85345
IPI00980423.1	SPARC	MGSNLSPQLCLMPFILGLLSGGVTTTPWSLARPQGSCSLEGVEIKGGSFRLLQEGQALEY	0.541563	0.391016	0.48562	0.281987	0.357249	0.167566	1.71048	0.921528	0.680893	0.850333	0.824905	0.41094	0.144656	1.72297	0.0874135	0.395512	0.14222	2.10495	0.496021	1.55091
IPI00982304.1	PSMC3	Uncharacterized protein	0.229124	0.172623	0.593574	0.224658	0.333995	0.333648	0.810228	0.29993	0.41737	1.1591	0.327757	0.352526	0.361985	0.219349	0.208946	0.110973	0.162503	1.94358	0.846783	0.946323
IPI00011229.1	CTSD	Cathepsin D	28.7363	16.9099	17.9014	23.1686	25.2271	20.8865	21.2133	22.6102	14.8049	20.3055	14.0724	11.537	33.062	28.3328	18.4891	0.833749	0.384122	0.891705	0.792819	0.942381
IPI01015998.1	ABCF1	ATP-binding cassette, sub-family F, member 1 variant member	0.724069	0.297158	0.30116	0.376625	0.400952	0.391912	0.352159	0.307147	0.880381	0.149612	0.587842	0.618566	0.368542	0.225422	0.172372	0.981128	0.98026	0.99107	0.838076	0.939419
IPI00061525.3	GNPNAT1	Glucosamine 6-phosphate N-acetyltransferase	0.243636	0.14165	0.276586	0.313992	0.282593	0.337673	0.420011	0.315979	0.244719	0.211393	0.393272	0.470804	0.409774	0.296808	0.230398	0.155913	0.284258	1.2156	0.075047	1.43116
IPI00307572.1	TMEM165	Transmembrane protein 165	0.266739	0.86334	0.819661	0.254617	0.197963	1.45095	0.40607	0.889644	2.23009	0.226095	0.280369	0.118339	2.53678	2.23876	0.261539	0.481834	0.2118	2.16576	0.327287	2.26273
IPI00935516.1	HSBP1	Heat shock factor-binding protein 1 1	0.253455	0.553325	0.152798	0.249221	0.343647	0.169036	0.146047	0.477277	0.384139	0.297261	0.242608	0.327258	0.258314	0.238242	0.147103	0.677503	0.869168	0.949314	0.39669	0.781686
IPI00007752.1	TUBB2C	Tubulin beta-2C chain	66.0369	41.8629	64.4496	18.6448	46.2314	43.7557	28.9682	25.5172	37.9808	47.1145	43.3061	52.542	46.7631	49.8251	39.2086	0.370611	0.306064	0.772837	0.9062	0.976476
IPI00009659.3	RPRD1B	Regulation of nuclear pre-mRNA domain-containing protein 1B domain-containing	4.9106	0.908148	0.391287	2.00611	0.144266	2.42049	1.35707	0.16687	1.57047	1.43764	0.138494	0.390447	1.91255	1.04913	0.258458	0.528769	0.776342	0.831603	0.366374	0.448433
IPI00020042.2	PSMC4	Isoform 1 of 26S protease regulatory subunit 6B protease	3.13986	6.09193	6.48452	7.06113	2.353	0.203246	6.88759	15.6946	0.444822	1.86555	0.308	4.74892	3.84851	0.136389	0.0985569	0.406902	0.998297	0.998623	0.0511316	0.363717
IPI00797970.1	COPS3	Uncharacterized protein	0.497166	0.174138	0.192443	0.217819	1.77645	0.70696	0.218484	0.63905	0.237368	0.467099	0.560661	1.30071	0.288852	0.236514	8.38436	0.378675	0.730585	0.793893	0.374552	3.76873
IPI00978387.1	NPEPPS	Uncharacterized protein	6.20272	5.40502	5.28389	1.8226	7.36609	6.2606	0.914782	5.34541	2.5345	4.97191	11.7868	9.10273	3.07396	4.06597	6.19026	0.290124	0.397573	0.767904	0.4127	1.31209
IPI00025427.2	RNASE3	Eosinophil cationic protein	0.271307	0.172588	0.584227	0.148538	0.327576	0.825935	0.390637	0.449876	0.42685	0.403097	0.251756	0.273403	0.15845	0.158703	0.239534	0.0309221	0.118245	1.65958	0.35035	0.7192
IPI00420014.2	SNRNP200	Isoform 1 of U5 small nuclear ribonucleoprotein 200 kDa helicase small	2.44071	2.29756	3.1186	2.91723	0.411453	2.21899	0.750175	2.998	5.24739	5.50827	5.65529	3.96192	2.99281	3.10458	4.57668	0.184818	0.321166	1.49504	0.0295637	1.81406
IPI00927087.2	NUP35	Uncharacterized protein	0.328212	0.187193	0.337626	0.155858	0.443375	0.771052	0.235402	0.266296	0.249083	0.225688	0.233841	0.259949	0.143468	0.197428	0.220752	0.393245	0.635167	1.20331	0.21725	0.726754
IPI00299506.9	GFPT1	Isoform 2 of Glucosamine--fructose-6-phosphate aminotransferase [isomerizing] 1 aminotransferase	1.04964	0.176092	0.256957	0.611363	2.21606	1.03247	10.6546	1.62428	0.285705	1.53666	0.330357	2.50828	0.405535	0.139748	0.374646	0.327698	0.326776	3.5112	0.853381	0.872034
IPI00152377.1	STT3B	Dolichyl-diphosphooligosaccharide--protein glycosyltransferase subunit STT3B	0.196146	0.901001	1.3743	1.50139	1.65107	0.938742	0.956012	1.32694	0.822393	0.763553	0.140282	0.312342	1.16578	1.08606	0.152101	0.200472	0.586847	0.854857	0.152515	0.507932
IPI00968274.1	FAM114A1	Uncharacterized protein	0.35767	0.956476	0.16141	0.25474	0.327394	0.212657	0.274866	0.153691	0.167926	0.20113	0.221872	0.17136	0.277123	0.240182	0.242155	0.192828	0.211052	0.490973	0.267925	0.560187
IPI00748856.3	SYNE1	Uncharacterized protein	0.217396	0.167032	0.24249	0.508106	0.390069	0.268185	0.402204	0.242962	0.151165	1.53135	0.483002	0.291567	0.28277	0.739745	0.116065	0.656676	0.457873	1.7021	0.551822	1.25445
IPI00017963.1	SNRPD2	Small nuclear ribonucleoprotein Sm D2 D2	2.60341	5.99641	6.76036	3.59328	4.84535	5.97691	5.05496	5.05426	11.5083	5.82759	1.90726	3.81293	7.1602	6.20874	4.97674	0.324866	0.224475	1.40436	0.965433	1.01122
IPI00922456.1	SH3GLB2	Uncharacterized protein	0.124706	1.58975	0.164231	0.252928	1.9855	0.158132	0.212849	0.336179	0.395925	0.54055	0.11396	0.101532	0.140759	0.337744	0.223214	0.17319	0.285403	0.39922	0.184515	0.22278
IPI00473068.1		Isoform 1 of Polypyrimidine tract-binding protein 1	0.159022	0.148126	0.474046	0.404525	0.285745	0.392292	0.106284	0.43888	0.688248	0.417544	0.409093	1.38022	0.423343	0.215043	0.334366	0.43942	0.344168	1.38858	0.296089	1.87709
IPI00179964.5	PTBP1	Isoform 1 of Polypyrimidine tract-binding protein 1 tract-binding	44.0509	44.3573	39.591	34.8238	27.2881	43.0816	40.2802	37.1502	52.7427	44.0815	48.1545	45.8039	32.4692	28.1156	31.5332	0.385718	0.225171	1.14321	0.880147	0.978778
IPI00396383.1	VWA1	Isoform 1 of von Willebrand factor A domain-containing protein 1 Willebrand	0.201954	0.134651	1.04095	0.271627	0.253666	0.717425	0.24879	0.648105	0.60374	0.823705	0.645773	0.458343	0.16519	0.436817	2.5156	0.497236	0.279861	1.59853	0.3544	2.21863
IPI00023598.2	TUBB4	Tubulin beta-4 chain	0.257706	0.119352	0.291931	0.17467	0.553594	1.6505	1.00619	0.343005	0.39379	0.220722	0.286161	0.263523	0.274029	0.195739	0.359983	0.121802	0.177785	2.58665	0.965958	0.987247
IPI00220754.1	ADD3	Isoform 1 of Gamma-adducin	0.636618	0.165328	1.19201	0.712223	0.216284	2.12447	1.63705	0.186533	0.404749	0.239202	2.20015	0.264988	2.62297	1.52414	2.29756	0.0834356	0.481535	1.57128	0.0433768	3.04873
IPI00927255.1	LANCL1	Uncharacterized protein	0.321993	0.3989	0.267832	0.720315	2.15293	0.516844	0.350965	2.0942	0.515699	3.01467	0.144586	0.369796	0.366326	0.418935	0.28636	0.214761	0.438733	1.68111	0.269259	0.410672
IPI00029629.4	TRIM25	E3 ubiquitin/ISG15 ligase TRIM25	0.706617	0.642247	1.28886	1.082	0.779003	0.37935	0.819605	0.939327	0.445964	0.176862	0.616854	0.443744	1.43445	1.22103	0.331872	0.34285	0.102325	0.613753	0.731371	0.899799
IPI00979506.1	SRSF10	serine/arginine-rich splicing factor 10 isoform 6	0.67301	0.588821	0.778085	0.177723	0.281889	0.290136	0.220982	0.177268	0.449564	0.53189	0.407932	0.358414	0.540737	1.12678	0.560738	0.270517	0.258228	0.668062	0.596714	1.19807
IPI00783987.2	C3	Complement C3 (Fragment)	128.944	102.672	68.2378	134.662	44.7061	169.53	129.257	82.969	350.823	149.262	269.53	163.744	70.1709	115.448	47.2846	0.32734	0.160442	1.84015	0.422302	1.39012
IPI00015077.1	EIF1	Eukaryotic translation initiation factor 1 1	1.69572	8.43565	2.93997	4.844	2.52696	5.40315	4.88887	4.30377	5.67177	4.2152	2.88386	4.48249	4.76508	5.01657	2.75987	0.662686	0.545873	1.19765	0.937315	0.973856
IPI00031397.3	ACSL3	Long-chain-fatty-acid--Co	0.700375	0.122029	0.516665	0.683541	0.193285	0.0996007	0.685914	0.18315	0.132017	0.241417	0.277854	0.551526	0.27458	0.085769	0.137757	0.414562	0.312373	0.605669	0.26286	0.599075
IPI00444262.3	NCL	cDNA FLJ45706 fis, clone FEBRA2028457, highly similar to Nucleolin FEBRA2028457,	46.2025	41.1637	38.5859	38.5805	32.2472	33.7684	31.0969	29.9213	34.3896	38.4683	36.2322	22.2927	45.0358	38.2397	23.6259	0.288071	0.0683992	0.85194	0.25108	0.840668
IPI00790317.1	DPM1	Uncharacterized protein	0.304265	0.273592	1.08756	1	1.25527	0.340588	0.189281	1.02243	0.244414	0.815637	0.218212	0.3067	0.65697	0.221473	0.257867	0.178232	0.354277	0.666298	0.0950421	0.423706
IPI00978187.1	NDUFV1	Isoform 2 of NADH dehydrogenase [ubiquinone] flavoprotein 1, mitochondrial dehydrogenase	0.832026	0.729763	1	0.979149	1.13014	1.12685	0.643896	0.839324	2.1658	1.22357	2.90855	3.09792	0.719267	0.824734	1.06984	0.28826	0.376931	1.28438	0.208577	1.84547
IPI00514053.1	ARCN1	Coatomer subunit delta	10.4346	4.30287	7.17312	6.08982	7.33807	5.57472	5.5902	5.28975	8.08585	5.55236	11.4304	14.8388	4.93757	5.30554	6.03436	0.428777	0.387943	0.851562	0.538794	1.20397
IPI00291928.8	RAB14	Ras-related protein Rab-14	15.9535	10.9822	11.0694	13.563	25.0997	13.0955	8.49727	9.91354	19.8312	5.49112	14.9109	8.51673	6.12368	13.3179	13.0267	0.375036	0.299342	0.741232	0.22172	0.729068
IPI00944980.1	TAPBP	Uncharacterized protein	0.129354	0.16795	0.27327	0.198554	0.402706	0.310938	0.501076	0.161387	0.766257	0.648824	0.203077	0.183214	0.186442	1.04957	0.708186	0.324806	0.0931231	2.03824	0.26685	1.98875
IPI00887461.4	HLA-B	LOC441528 Major histocompatibility complex, class I, B	0.161813	0.128693	0.576543	0.300347	0.441351	0.323514	0.314471	0.21173	0.12671	0.418616	4.56084	0.246917	0.406746	0.142595	0.229808	0.436566	0.677526	0.867161	0.409326	3.47283
IPI00843886.1	APOO	20 kDa protein	0.279283	0.379692	0.214121	0.130869	0.562062	0.145955	0.235631	0.458661	0.643584	0.207819	0.20657	0.136304	0.386275	0.461947	0.249723	0.899649	0.838195	1.08022	0.79965	0.920047
IPI00847896.1	GRWD1	Similar to Glutamate-rich WD repeat-containing protein 1 repeat-containing	0.19106	0.265135	0.599362	0.521161	0.278317	0.584024	0.355076	0.3989	0.320634	0.523079	0.180166	0.409802	0.228616	0.485048	0.172827	0.348479	0.511218	1.1761	0.48071	0.79592
IPI01015295.1	PSMD3	Uncharacterized protein	1.73351	1.95098	1.25128	0.59903	0.502536	0.601068	2.92493	2.72962	2.6857	1.84255	2.10921	1.44543	3.70096	1.44995	1.27969	0.234534	0.110718	1.78619	0.184615	1.65391
IPI00029717.1	FGA	Isoform 2 of Fibrinogen alpha chain alpha	213.516	92.2003	64.799	324.798	29.493	77.9026	77.854	154.933	577.109	136.466	217.339	75.1187	66.9773	57.8682	111.384	0.571329	0.601262	1.41316	0.549612	0.729418
IPI00783665.5	LAMA5	Laminin subunit alpha-5	0.167915	0.0841963	0.280078	0.435758	0.373997	0.287972	0.4185	0.24917	0.43149	0.387025	0.401007	0.158736	0.575186	0.266093	2.70682	0.351334	0.285743	1.32208	0.311897	3.06111
IPI00218732.4	PON1	Serum paraoxonase/arylesterase 1	1.00765	0.13039	0.20288	2.44257	0.16967	1.68389	2.21545	0.276069	5.8722	2.03468	3.102	3.42808	0.585483	0.296006	0.334181	0.314305	0.167532	3.05636	0.393594	1.95938
IPI00063245.3	FUBP3	Uncharacterized protein	0.189465	0.284993	0.195644	0.245705	0.231503	0.341297	0.323918	0.436423	0.481364	0.29084	0.162229	0.473718	0.57054	0.292519	0.194198	0.156723	0.0116612	1.63325	0.244652	1.4758
IPI00956631.3	ALPL	alkaline phosphatase, tissue-nonspecific isozyme isoform 2 isoform	0.426702	0.999861	0.260942	0.364174	0.301786	0.35834	0.455114	0.826737	0.42845	0.328895	0.165867	0.354437	0.231727	0.975829	0.203218	0.852128	0.958223	1.01873	0.687694	0.820525
IPI00008529.1	RPLP2	60S acidic ribosomal protein P2 P2	40.1047	32.6407	87.366	53.5346	43.3452	53.4753	46.0714	42.7573	76.1304	45.3396	8.97368	39.5855	65.2814	49.8596	33.0505	0.491651	0.908547	1.02639	0.394656	0.765593
IPI00337741.4	APEH	Acylamino-acid-releasing enzyme	0.364225	0.620026	0.632791	1.31887	2.71471	0.99323	0.166674	0.359983	2.54506	0.737799	4.7361	3.25239	0.502397	1.19731	1.26558	0.291546	0.784538	0.84995	0.278475	1.93851
IPI00005978.8	SRSF2	Serine/arginine-rich splicing factor 2	5.03363	7.06995	3.90304	0.162262	3.50812	3.86857	5.49188	4.51304	4.36294	4.78427	5.39043	4.44628	6.10292	2.68663	3.36895	0.819348	0.591997	1.16993	0.731298	1.11781
IPI00014263.1	EIF4H	Isoform Long of Eukaryotic translation initiation factor 4H translation	1.82046	4.36808	1.77916	3.39286	6.38816	1.76137	2.54312	2.07197	3.76591	2.52941	0.232887	2.03694	2.93508	2.07729	3.33549	0.28157	0.321519	0.713955	0.204601	0.598222
IPI00068430.1	SNRPEL1	Putative small nuclear ribonucleoprotein polypeptide E-like protein 1 polypeptide	1.61653	4.0917	6.78947	2.87308	1.65187	1.83325	2.21115	2.5252	2.10745	2.31739	0.518207	0.908274	1.47182	2.74708	6.90624	0.610782	0.279218	0.645871	0.570109	0.737348
IPI01009940.2	NDUFA10	Uncharacterized protein	8.14266	4.24128	3.02996	3.89953	0.301473	3.4103	2.38849	1.61328	2.25824	3.27433	0.614677	0.145108	3.74457	3.22925	3.64217	0.399252	0.35781	0.65994	0.305236	0.579956
IPI00029140.7	CRAT	Uncharacterized protein	0.190597	0.360882	0.346013	0.107522	0.130083	0.103192	0.174053	0.355815	1.05981	0.256086	0.286419	0.437544	0.201646	0.156594	0.298644	0.565893	0.411195	1.71699	0.514121	1.2165
IPI00009253.2	NAPA	Alpha-soluble NSF attachment protein	0.82955	3.31613	2.25074	0.282339	0.402734	1.20623	0.950198	1.3027	1.52045	1.64422	0.346638	0.3888	0.753145	0.190096	0.866517	0.181672	0.886031	0.935366	0.201363	0.359415
IPI00024282.1	RAB8B	Ras-related protein Rab-8B	0.177612	0.37322	0.161578	0.905069	0.395541	0.184105	0.306445	0.224876	0.448289	0.180666	1.1256	0.361759	0.418674	0.351306	0.253771	0.431752	0.393814	0.667843	0.644486	1.24744
IPI00472939.3	SPCS2	#REF!	0.147573	0.783171	0.170672	0.432538	0.435698	0.83503	0.509799	0.803127	0.751372	0.924471	0.271703	0.411425	0.468298	0.365135	0.631783	0.0174341	0.0300959	1.94136	0.792306	1.09072
IPI00104128.3	SEC11A	Signal peptidase complex catalytic subunit SEC11A subunit	1.4286	1.12951	1.04008	0.361985	2.23845	1.6481	1.92332	1.92439	1.91348	0.189294	3.22769	2.47101	3.41267	0.838917	1.8335	0.136665	0.554796	1.22585	0.088244	1.90103
IPI00893431.2	EIF3B	cDNA FLJ53410, highly similar to Eukaryotic translation initiation factor 3 subunit 9 to	1.5538	1.0749	0.778517	0.965735	0.169317	1.17048	1.13022	8.64101	2.08667	1.46866	3.36405	1.71321	0.955283	1.19748	0.156996	0.308141	0.242088	3.19159	0.368441	1.62628
IPI01026455.1	NDUFS8	Uncharacterized protein	1.19839	1.06526	0.499757	0.679008	0.61289	0.362587	0.496787	0.230958	0.211877	0.450375	0.214478	0.119759	0.844986	0.809218	1.26672	0.12966	0.0236022	0.432171	0.548197	0.802693
IPI00102821.4	MZB1	Isoform 1 of Plasma cell-induced resident endoplasmic reticulum protein cell-induced	0.071988	0.199353	0.359011	0.432388	0.349872	0.321903	0.208758	0.211276	1.02222	0.294431	0.130715	0.626115	0.232596	2.34909	0.254899	0.493962	0.472652	1.45729	0.356384	2.54381
IPI00304803.3	GMPR	GMP reductase 1	0.608277	0.160996	1.59781	0.681412	0.384379	0.25407	0.280778	0.154674	0.710054	0.36913	0.672124	0.437089	0.27127	0.245995	0.408413	0.314154	0.26001	0.515225	0.328386	0.592765
IPI00008527.3	RPLP1	60S acidic ribosomal protein P1 P1	6.38108	21.2369	11.3184	16.193	7.74197	12.6415	11.6794	13.0955	18.5571	26.1638	5.61389	3.85171	23.0341	10.2255	4.67381	0.304479	0.347964	1.30644	0.512526	0.753905
IPI00909975.1	UBE2L3	cDNA FLJ59174, highly similar to Ubiquitin-conjugating enzyme E2 L3 to	11.6908	7.03232	12.6898	14.7128	20.7897	13.0955	18.1802	13.4087	11.002	19.7297	12.6144	4.74826	11.028	18.9405	5.94427	0.379334	0.559642	1.12704	0.444765	0.79616
IPI00922838.1	HYOU1	cDNA FLJ56074, highly similar to 150 kDa oxygen-regulated protein to	9.17622	15.1097	10.3489	1.32767	11.9663	13.739	9.29465	3.481	10.8649	15.5205	5.32322	5.996	16.7536	11.8638	7.00022	0.918386	0.756371	1.10372	0.951436	0.979307
IPI00929470.1	RBM42	Isoform 4 of RNA-binding protein 42 protein	0.18152	0.334992	0.502397	0.202136	0.301933	0.458852	0.384405	0.308106	0.229967	0.291951	0.431819	0.0983317	0.18696	0.182314	0.139612	0.242539	0.678922	1.09869	0.270327	0.682241
IPI00029628.1	RCN2	Reticulocalbin-2	1.275	0.209018	0.209033	2.1601	1.55833	0.200323	0.246558	0.483839	1.77412	0.584834	0.532406	0.513843	0.28035	0.301243	0.240982	0.23692	0.404521	0.607905	0.139138	0.345344
IPI00946557.1	ATG3	Uncharacterized protein	0.195888	0.191817	0.190663	0.0925707	0.426643	0.541112	0.251129	0.134455	0.357273	0.407197	0.49404	0.244957	0.426909	0.277739	0.210866	0.328387	0.218201	1.54081	0.191052	1.50742
IPI00964151.1	ADD1	Uncharacterized protein	1.2853	4.69362	1.02215	0.518279	0.221242	3.07418	0.40796	1.45649	3.22769	0.419052	0.710497	0.966539	1.98908	3.06545	1.59295	0.981583	0.872351	1.10914	0.901995	1.07544
IPI00025329.1	RPL19	60S ribosomal protein L19	10.2995	6.44419	9.81236	12.0913	9.34827	7.86039	6.34931	6.50162	11.1913	10.5246	8.74465	8.44794	14.137	9.31399	5.81105	0.768573	0.437618	0.883981	0.855677	0.967892
IPI00022143.3	ESYT1	Isoform 1 of Extended synaptotagmin-1 synaptotagmin-1	7.51514	4.69492	4.00916	3.60001	0.793719	9.81508	3.4174	8.25518	6.99294	7.05477	4.63028	5.14439	8.28212	3.60925	4.96846	0.138688	0.0831898	1.72394	0.395041	1.29213
IPI00219526.6	PGM1	Isoform 1 of Phosphoglucomutase-1	1.69431	1.72178	2.16835	2.63134	1.50358	2.2414	1.46927	1.22485	1.51708	1.77338	3.36335	0.330403	1	1.48432	1.13053	0.599097	0.296373	0.846349	0.418986	0.751963
IPI00896380.1	IGHM	Isoform 2 of Ig mu chain C region mu	27.9079	9.93555	14.0724	29.2629	9.59977	15.5065	27.0321	23.167	29.7971	25.809	31.669	19.1199	21.7403	29.2568	15.2538	0.411033	0.263334	1.33635	0.355422	1.28929
IPI00001539.8	ACAA2	3-ketoacyl-CoA thiolase, mitochondrial	0.977996	0.715786	21.0041	1.26866	0.909093	0.850628	0.202276	0.658612	0.770037	1.73448	3.76252	1.00563	1.17016	0.993161	0.982003	0.437386	0.361269	0.169484	0.44729	0.318121
IPI00470924.2	TMTC3	Isoform 2 of Transmembrane and TPR repeat-containing protein 3 and	0.201423	0.18371	0.144967	0.210268	0.172014	0.293636	0.0705505	0.233501	0.360857	0.0913849	0.210239	0.451876	0.241116	0.295555	0.074599	0.584063	0.656321	1.15076	0.307473	1.39567
IPI00985110.2	NSF	cDNA FLJ59316, highly similar to Vesicle-fusing ATPase to	1.26348	1.42524	1.54414	0.20925	1.4281	0.313253	0.659388	0.467585	0.374335	0.288012	0.479532	1.77855	0.162465	1.00793	0.676705	0.0861924	0.0348488	0.358177	0.367391	0.699326
IPI00927670.1	MTX2	Uncharacterized protein	0.118159	0.288172	0.153063	0.272212	0.701055	0.558334	0.19183	0.449627	1.41863	0.4102	0.202683	0.457772	0.0538765	0.396804	0.342506	0.251791	0.253077	1.97606	0.904289	0.948443
IPI00854743.1	LOC652113	Immunglobulin heavy chain variable region region	0.756861	0.660349	0.245467	0.728197	0.181055	0.200143	0.381459	0.338822	0.447854	0.293901	1.11853	0.294839	0.183481	0.478171	0.452597	0.504551	0.225256	0.646277	0.966571	0.982771
IPI00470619.4	GNG2	Guanine nucleotide-binding protein G(I)/G(S)/G(O) subunit gamma-2 subunit	0.139265	0.126824	0.301661	0.620585	0.242877	0.536593	0.400313	0.226252	0.256672	0.771694	0.350844	0.121573	0.373686	0.236514	0.338095	0.347073	0.290941	1.53124	0.984121	0.992664
IPI01015600.1	SARNP	CIP29 protein	0.797966	0.324907	0.152196	0.19876	0.27745	0.0856146	0.154953	0.0753839	0.522173	0.435185	0.732601	0.244262	0.225375	0.223539	0.0929501	0.821939	0.539589	0.727074	0.778913	0.86721
IPI00031804.1	VDAC3	Isoform 1 of Voltage-dependent anion-selective channel protein 3 anion-selective	2.99405	3.57316	4.40579	3.70995	6.16842	3.64344	2.91299	3.10717	6.07633	2.64799	6.13728	4.22046	2.91117	5.2784	5.46757	0.413843	0.568703	0.881857	0.444307	1.15172
IPI00645898.3	XPNPEP1	X-prolyl aminopeptidase (Aminopeptidase P) 1, soluble 1,	1.11435	1.61485	1.62383	1.19582	1.88022	0.184859	1.05614	2.8414	0.811296	0.313601	0.608403	0.233906	0.89888	0.411111	2.00361	0.408024	0.415839	0.700935	0.10958	0.559412
IPI00004534.5	PFAS	Phosphoribosylformylglycinamidine synthase	0.440648	0.0767282	1.37659	0.0813	0.762495	1.40971	0.622437	0.303086	0.17085	0.521703	1.79776	0.296869	0.432598	0.599487	0.637457	0.830301	0.863036	1.10593	0.58652	1.37491
IPI00216492.1	HNRNPH3	Isoform 2 of Heterogeneous nuclear ribonucleoprotein H3 nuclear	5.42003	8.49904	8.25633	6.81116	11.652	5.80461	3.91687	9.69069	8.37506	4.67803	2.33189	6.11647	5.66313	8.95877	9.19341	0.511803	0.311686	0.798879	0.335256	0.793919
IPI00032313.1	S100A4	S100A4 Protein S100-A4	1.29918	0.276126	1.36197	0.642559	0.221334	0.185218	3.65051	0.321569	0.512882	4.92458	8.52914	4.4067	3.46415	0.291951	1.90607	0.148639	0.312469	2.52416	0.100186	4.8927
IPI00643617.1	CUL2	Uncharacterized protein	0.301766	0.220508	0.426022	0.194454	0.565618	0.255838	0.485957	0.538232	0.295269	0.418007	0.0636763	0.179543	0.336062	0.288291	0.205898	0.108562	0.534976	1.16679	0.171835	0.628361
IPI00019568.1	F2	Prothrombin (Fragment)	2.88726	1.65015	0.18413	4.34423	1.59804	6.27145	3.12531	1.96864	10.1746	2.89367	19.7598	7.11962	0.216915	1.47202	1.8706	0.480862	0.151706	2.29127	0.339456	2.85442
IPI00514669.1	SH3BGRL3	Uncharacterized protein	8.13025	6.29105	9.72703	8.39191	7.80988	10.5458	8.79876	8.86979	11.1905	11.8146	34.2754	25.7625	6.74632	8.1817	5.19311	0.275399	0.029766	1.26938	0.248142	1.98659
IPI00655650.2	RPS26	40S ribosomal protein S26	3.04808	6.34227	0.134046	7.98726	6.03394	2.61389	3.51884	4.74464	3.0962	5.19455	2.09856	6.12114	3.16433	5.05006	6.83244	0.788522	0.579431	0.814086	0.974039	0.988148
IPI00384155.1	LGMN	Uncharacterized protein	0.826336	1.57058	3.03901	1.66671	0.218681	1.33358	1.47509	0.77448	0.51853	2.65167	0.990549	1.87332	4.51836	3.10093	2.71678	0.160218	0.855059	0.922422	0.162194	1.80295
IPI00743775.1	CCDC47	Isoform 2 of Coiled-coil domain-containing protein 47 domain-containing	0.215685	0.113637	0.153818	0.509905	0.417226	0.464291	0.482968	0.206369	0.825706	0.325381	0.420186	2.46212	0.229108	0.220324	0.659205	0.379967	0.207974	1.63424	0.292971	2.82991
IPI00020510.1	CISD1	CDGSH iron-sulfur domain-containing protein 1 1	0.337673	0.230382	0.394036	1.21909	0.290679	0.167554	0.758174	0.758226	0.754608	0.192496	0.5677	0.322663	0.218424	0.394227	0.273687	0.658253	0.894166	1.06441	0.504196	0.718772
IPI01010638.1	PHGDH	Uncharacterized protein	1.75005	1.53241	0.273668	0.336808	0.352721	0.562451	0.218666	0.346998	1.00982	0.60815	0.513202	0.293188	0.366148	0.359609	0.239683	0.267448	0.431295	0.646799	0.204045	0.417328
IPI00978195.1	ABI1	abl interactor 1 isoform j j	0.726382	0.119121	0.224455	0.253666	0.418645	0.220462	0.591111	0.812759	0.367904	0.223787	0.221595	0.243434	0.105265	0.413655	0.26906	0.383524	0.560484	1.27192	0.436719	0.719182
IPI00031169.1	RAB2A	Ras-related protein Rab-2A	6.29628	6.86519	7.94089	6.33656	8.91417	5.30996	6.409	7.96017	9.36514	7.34417	7.15524	7.18207	4.78063	6.21433	6.21347	0.392861	0.993615	1.00097	0.189774	0.86776
IPI00645630.2	ECHDC1	enoyl-CoA hydratase domain-containing protein 1 isoform 3 1	0.217728	0.232306	0.226801	0.801792	0.305406	0.840256	0.48761	0.169681	0.170247	0.223772	0.614634	0.34813	0.423519	0.532813	0.267498	0.856801	0.903376	1.06027	0.552972	1.22565
IPI00016786.1	CDC42	Isoform 2 of Cell division control protein 42 homolog division	40.3837	13.2205	10.0026	12.2814	15.7448	7.30305	10.1029	11.7827	16.2492	20.0454	12.0712	7.32892	13.3318	13.329	7.66667	0.33972	0.42355	0.714627	0.250991	0.586336
IPI00477831.2	ERAP1	Isoform 1 of Endoplasmic reticulum aminopeptidase 1 reticulum	1.6576	1.43515	2.24435	1.94248	3.06822	2.2664	1.35783	0.248635	3.73809	1.9726	0.191976	0.818583	5.95252	3.51762	1.24306	0.91284	0.818952	0.926143	0.813249	1.13297
IPI00926007.2	TMEM43	FLJ00144 protein (Fragment)	0.206985	0.392945	0.444206	0.294349	0.353186	0.382492	0.341699	0.360682	0.2355	0.406295	0.138092	0.711877	0.173247	0.217427	0.061785	0.667835	0.89353	1.02069	0.55384	0.769906
IPI00019345.1	RAP1A	Ras-related	0.373661	0.300305	0.277239	0.351501	0.207618	0.446831	0.158077	0.248928	0.23139	0.346878	0.184693	0.157225	0.305237	0.21173	0.297055	0.404827	0.795993	0.948211	0.128406	0.765359
IPI00181728.1	BRIX1	Ribosome biogenesis protein BRX1 homolog homolog	0.73316	0.10373	0.287792	0.374698	0.198471	0.273839	0.373246	0.267183	0.285785	0.0986662	0.563232	0.175909	0.240215	0.304877	0.394774	0.722861	0.523887	0.764919	0.977284	0.988901
IPI00024913.2	C21orf33	Isoform Long of ES1 protein homolog, mitochondrial protein	2.12889	1.9308	3.05294	6.59193	5.94427	4.81021	3.30878	4.45647	13.5855	4.26723	6.11096	5.19672	4.23599	4.21666	3.08806	0.485885	0.350445	1.5486	0.583005	1.16284
IPI00924820.1		similar to kappa light chain variable region chain	0.634108	0.169905	0.263304	0.286677	0.325787	0.144136	0.508564	0.369309	1.13824	0.278742	0.918977	1.12631	0.192163	0.169599	0.595594	0.503295	0.457275	1.45197	0.253527	1.78752
IPI00921822.2	PNPLA6	neuropathy target esterase isoform c c	0.0845296	0.489574	0.146158	0.735298	0.459265	0.111537	0.341344	0.347937	0.721064	0.449004	0.11753	0.414516	0.313492	0.521811	0.199436	0.824397	0.944208	1.02928	0.634994	0.81824
IPI00555565.1	HSP90AB4P	Putative heat shock protein HSP 90-beta 4 HSP	3.68024	0.115415	1.34201	1.63184	0.69892	1.1299	0.739796	1.04986	0.288631	0.949342	0.523841	0.193929	1.95775	1.29801	1.74098	0.539699	0.342872	0.556681	0.631317	0.765156
IPI00302458.10	XPO7	Exportin-7	0.366174	0.275858	0.149519	0.662458	0.436151	0.259283	0.170649	0.329694	0.798409	0.567346	0.416157	0.357893	0.255784	0.207158	0.219425	0.551332	0.750977	1.12444	0.398065	0.770526
IPI00017160.3	VTA1	Vacuolar protein sorting-associated protein VTA1 homolog VTA1	0.235647	1.61429	0.556827	2.00125	0.199838	1.33099	0.331045	2.1625	0.464452	0.465677	1.17007	2.211	2.5135	1.40075	0.803405	0.313148	0.955661	1.03186	0.194162	1.7576
IPI00026328.3	TXNDC12	Thioredoxin domain-containing protein 12	0.282887	0.356161	0.443283	0.211716	0.35829	0.722565	0.354068	0.847274	0.482433	0.367318	0.266517	0.135259	0.755393	0.510612	0.329123	0.217848	0.0856739	1.67863	0.573177	1.20853
IPI00788840.1	NAP1L4	Uncharacterized protein	2.41279	3.51738	2.44409	2.32012	2.46622	2.97791	2.33367	2.19132	3.85679	1.95599	3.22478	0.128925	2.41045	2.02216	1.60192	0.288702	0.941727	1.01178	0.230262	0.713359
IPI00549189.4	THOP1	Thimet oligopeptidase	0.0641725	0.303149	0.284875	0.185334	0.186597	0.242524	0.269247	0.600527	0.506172	0.293432	0.144346	0.186675	0.348807	0.360307	0.274352	0.101553	0.0741905	1.86686	0.365947	1.28352
IPI00783228.4	SPTB	Isoform 1 of Spectrin beta chain, erythrocyte beta	1.31759	0.210457	0.369309	0.38064	0.388719	0.266979	0.243501	0.231695	0.331642	0.266425	0.161735	0.142803	0.69892	0.140476	0.30817	0.316546	0.253472	0.502582	0.322236	0.54453
IPI00964788.1	NDUFS4	13 kDa protein	0.522499	0.992404	0.818583	0.215401	0.504211	0.328508	0.27005	0.195847	0.426022	0.25444	0.480098	0.188273	0.164733	0.476022	0.232612	0.0502431	0.0784245	0.483072	0.0939536	0.504975
IPI00012268.3	PSMD2	26S proteasome non-ATPase regulatory subunit 2 subunit	0.87843	6.05783	2.34421	3.07162	1.98027	1.41088	1.84984	1.65324	0.400424	2.16565	4.78328	2.94915	1.85793	0.950396	2.25246	0.327905	0.198527	0.521899	0.784299	0.892611
IPI00018364.2	RAP2B	Ras-related protein Rap-2b	0.293575	0.591849	0.552367	0.420361	0.409973	0.41633	0.655833	0.199215	1.13627	1.072	0.227478	0.135522	1.06563	0.331275	0.156442	0.329784	0.260958	1.53415	0.715854	0.844902
IPI00385260.1	RPRD1A	Isoform 3 of Regulation of nuclear pre-mRNA domain-containing protein 1A of	0.23115	0.237138	0.424401	0.19199	0.259607	0.152069	0.18554	0.205442	0.2397	0.337954	0.312364	0.268669	0.211012	0.266074	0.227778	0.592931	0.411037	0.83368	0.800771	0.956566
IPI00007074.5	YARS	Tyrosyl-tRNA synthetase, cytoplasmic	0.659983	0.376625	0.766204	0.457359	0.431909	0.603698	0.585402	0.697952	0.455714	0.624771	0.764082	1.72238	0.398541	0.847685	0.609501	0.241618	0.536884	1.10232	0.226974	1.61295
IPI00339274.5	HIST2H2AC	Histone H2A type 2-C	913.651	804.361	562.457	577.789	694.581	520.336	503.413	577.269	903.136	631.571	1170.09	863.529	707.703	341.964	690.597	0.646133	0.42318	0.882597	0.778565	1.06221
IPI00031820.3	FARSA	Phenylalanyl-tRNA synthetase alpha chain	2.77618	3.39286	1.99253	2.30825	2.3153	0.119858	2.9555	3.96989	2.2664	2.67938	1.33265	1.00926	2.66586	2.39429	3.03669	0.762372	0.824382	0.93789	0.343928	0.816477
IPI00855957.3	KHSRP	Isoform 2 of Far upstream element-binding protein 2 upstream	10.2817	8.98177	10.9526	14.6843	6.84429	10.7027	12.0487	11.4375	7.78663	8.59978	13.6535	8.9507	10.9663	9.57319	11.8072	0.819334	0.883016	0.977402	0.689279	1.06196
IPI00642632.2	IGLC7	Ig lambda-7 chain C region region	0.302331	0.107753	0.24936	0.469013	0.937766	0.286856	0.318994	0.333209	0.289653	0.340777	0.628812	0.385259	0.578264	0.394364	0.234344	0.596395	0.527035	0.759594	0.853177	1.07493
IPI00735310.2	LAMA4	Laminin subunit alpha-4	0.183176	0.0998081	0.192977	0.458248	0.492536	0.0957954	0.282966	0.654743	0.306339	1.75784	0.353553	0.249429	0.362914	0.167276	0.346854	0.359034	0.333191	2.17115	0.907868	1.03735
IPI00910126.1	REEP6	cDNA FLJ59119, highly similar to Receptor expression-enhancing protein 6 to	0.839731	0.125	0.257332	0.24714	0.448444	0.176092	0.0685405	0.219547	0.394118	0.472963	0.35584	0.15963	0.180041	0.209889	0.128292	0.373406	0.448199	0.694216	0.238475	0.539042
IPI00556190.2	NDUFB5	NADH dehydrogenase [ubiquinone] 1 beta subcomplex subunit 5, mitochondrial isoform 2 beta	0.272193	0.301975	0.533552	0.295986	0.271326	0.21037	0.158813	0.421323	0.494314	0.227336	0.249446	0.537412	0.205684	0.279554	0.504211	0.833427	0.703563	0.902763	0.818322	1.06046
IPI00745502.2	PSMC5	26S protease regulatory subunit 8 isoform 2 8	2.09304	2.87368	1.61597	1.10826	1.14647	0.922742	0.674879	0.274656	4.67997	1.22561	2.41329	0.87618	1.58052	1.40766	0.743188	0.887802	0.814991	0.880105	0.436869	0.794444
IPI01009034.1	OSBPL8	oxysterol-binding protein-related protein 8 isoform b isoform	0.312754	0.222658	0.249429	0.226189	0.527704	0.177649	0.273043	0.701007	1.24643	0.500728	0.344769	1.02463	0.424195	0.508211	0.312386	0.36477	0.231805	1.88392	0.185103	1.69892
IPI00215917.3	ARF3	ADP-ribosylation factor 3	10.5123	7.48188	6.76036	10.3031	10.1612	9.79741	8.41638	10.6339	12.7206	5.89912	3.63108	7.04989	8.90614	10.2845	4.26427	0.222738	0.75519	1.04973	0.188295	0.754906
IPI00008240.2	MARS	Methionyl-tRNA synthetase, cytoplasmic	1.30315	0.571688	0.869646	2.47512	1.89619	1.13328	0.246114	2.54983	3.52812	2.33966	2.59548	1.81039	2.42099	1.7708	4.78328	0.246383	0.450793	1.3768	0.0971354	1.88046
IPI00024266.3	MGST3	Microsomal glutathione S-transferase 3	0.0989882	0.47477	0.197538	0.915289	0.369975	0.657836	0.27327	0.226283	2.58775	0.478171	0.0877413	0.426761	0.357249	0.290297	0.43392	0.37244	0.395448	2.05358	0.576929	0.776037
IPI00172656.6	FAF2	FAS-associated factor 2	0.241417	0.188888	0.533404	0.455051	0.43413	0.0694684	0.0764945	0.365464	0.281284	0.457264	0.367904	0.270706	0.106424	0.247723	0.610727	0.547335	0.271102	0.674608	0.653109	0.865397
IPI00009456.1	NT5E	5-nucleotidase	4.11759	1.10957	2.93936	1.11049	2.44088	1.91242	0.316198	5.23032	6.21433	0.226314	2.45003	2.13998	2.10074	0.206899	1.00125	0.598118	0.762111	1.18619	0.316821	0.67409
IPI00337736.1	KTN1	Isoform 2 of Kinectin	1.3017	6.15603	2.74328	2.92878	1.74606	6.11605	5.59214	7.39628	2.06108	3.42191	2.93834	0.820799	2.19178	3.73757	2.27726	0.101009	0.169022	1.65284	0.572311	0.804374
IPI00218830.1	NMT1	Isoform Short of Glycylpeptide N-tetradecanoyltransferase 1 N-tetradecanoyltransferase	0.263797	0.153318	0.425108	0.36377	0.268538	0.607813	0.159508	1.5997	0.251024	0.0726849	0.217125	0.33847	0.185308	0.361333	0.168883	0.448703	0.438236	1.8248	0.526599	0.86205
IPI00027212.1	INSRR	Insulin receptor-related protein	0.244245	0.166963	0.209889	0.166293	0.329763	0.190307	0.231535	0.604117	0.4194	0.264035	0.356309	0.131798	0.171562	0.283535	0.259409	0.267082	0.205493	1.53013	0.743307	1.0765
IPI01015591.2	DHX15	Uncharacterized protein	0.189885	1.25579	2.88886	4.17015	2.46383	0.926588	1.2373	8.40589	18.2889	12.3968	1.86219	2.74594	2.69802	2.27647	6.14452	0.11281	0.1431	3.76127	0.38173	1.43384
IPI00023591.1	PURA	Transcriptional activator protein Pur-alpha	0.187583	0.201339	0.242877	0.17963	0.356655	0.290096	0.392238	0.257796	0.345247	0.158088	0.388046	1	0.147798	0.295248	0.662412	0.14161	0.31808	1.23575	0.154782	2.1347
IPI00012382.3	SNRPA	U1 small nuclear ribonucleoprotein A A	1.54767	1.16837	0.863998	0.348758	1.21698	0.392428	0.154042	1.2937	0.216554	0.160173	1.42011	0.139216	0.339363	1.26663	1.13556	0.213801	0.0835458	0.430818	0.621787	0.835807
IPI00908532.1	LAMP1	cDNA FLJ57633, highly similar to Lysosome-associated membrane glycoprotein 1 to	0.500381	0.210735	0.208772	0.324165	0.300263	0.205883	0.374179	0.245467	0.630033	0.254	1.83223	1.29999	0.122385	0.924727	0.139023	0.129205	0.735003	1.107	0.170967	2.79629
IPI01014445.1	KIAA1210	Conserved hypothetical protein	0.423343	0.0677282	0.474211	0.18103	0.577383	0.377985	0.157116	0.219182	0.108909	0.548818	0.517346	0.307104	0.567306	0.464999	0.194413	0.563158	0.630689	0.819176	0.59442	1.18998
IPI00641181.5	MARCKSL1	MARCKS-related protein	2.01712	1.90119	0.413712	0.532222	0.425196	2.36936	1.93321	0.410883	2.34665	2.01266	0.299556	0.154524	1.81819	2.24809	1.75844	0.388333	0.181176	1.71526	0.735795	1.18704
IPI00382459.1	CUL3	Isoform 3 of Cullin-3	0.113684	0.291466	0.379139	0.345343	0.291587	0.513025	0.512882	0.205812	0.583417	0.338259	0.240482	0.161074	0.265209	0.483002	0.165982	0.131147	0.121588	1.51517	0.784332	0.925789
IPI00876888.1	IGHV4-31	IGHG1 44 kDa protein	5.72232	4.43305	6.229	9.18704	0.198031	1.29792	2.35055	0.264291	0.611956	6.3234	6.07591	3.26843	0.466937	2.59836	0.310013	0.210868	0.144412	0.420968	0.189756	0.493594
IPI00220993.1	CNP	Isoform CNPI of 2,3-cyclic-nucleotide 3-phosphodiesterase 3-phosphodiesterase	0.169024	0.569947	0.194494	1.18987	0.706225	1.31203	0.318464	1.67226	0.477277	1.87761	0.204532	0.304138	0.939262	1.15141	0.329671	0.205193	0.168909	1.99948	0.942721	1.03515
IPI00221360.1	PYCARD	Isoform 2 of Apoptosis-associated speck-like protein containing a CARD speck-like	0.146615	0.094706	0.385579	0.373091	0.597123	0.139072	0.147604	0.214894	0.402874	0.137671	0.230782	0.228268	0.488659	0.188757	0.152375	0.541014	0.324949	0.652499	0.587924	0.806981
IPI00916802.1	SSB	Uncharacterized protein	6.58143	5.33578	6.3886	5.5755	4.95539	10.1781	8.29476	8.15904	3.03438	8.30972	6.64468	3.67132	6.1804	6.59375	0.661036	0.157653	0.206081	1.31693	0.439148	0.823645
IPI00017339.1	SF3B4	Splicing factor 3B subunit 4 4	0.352037	0.0896595	0.223617	0.409433	0.163142	0.303212	0.337299	0.180079	0.591808	0.879527	0.409689	0.392346	0.21903	0.832949	0.274523	0.319116	0.180089	1.85148	0.196149	1.71949
IPI00981730.1	CRYAB	Uncharacterized protein	0.145895	0.338634	0.170247	7.75486	2.3692	4.89531	2.91986	3.21206	0.376025	0.964732	3.32487	3.99778	3.41645	1.6077	1.83987	0.89185	0.855311	1.14743	0.676188	1.31616
IPI00220835.7	SEC61B	Protein transport protein Sec61 subunit beta subunit	2.7706	1.40961	1.86451	1.96251	1.96061	2.10482	0.365717	0.338963	2.93284	1.81592	2.91481	0.199962	1.78336	1.58733	1.14076	0.647491	0.420256	0.758265	0.380019	0.765082
IPI01026045.1	IGKV3D-15	Myosin-reactive immunoglobulin light chain variable region variable	0.287772	0.186701	0.3252	0.583175	0.406098	0.402539	0.227006	0.602069	0.475264	0.465547	0.261195	0.341439	0.350771	0.343314	0.192589	0.253255	0.420636	1.21436	0.446853	0.832506
IPI00032460.3	LSM2	LSM2 U6 snRNA-associated Sm-like protein LSm2	1.85305	1.83566	1.23713	3.56104	2.99136	2.5944	4.15313	3.95918	3.74769	3.6782	0.133416	3.68637	2.6524	4.03089	0.997923	0.160668	0.0343576	1.57974	0.995974	1.00198
IPI00945736.1	ACOT9	30 kDa protein	0.188626	1.272	0.160673	0.590496	0.694429	1.46958	2.0327	0.374412	2.48923	2.38105	0.269826	0.221949	2.29104	2.24793	0.300471	0.133767	0.0365906	3.00974	0.400998	1.83441
IPI00375513.3	COMT	Isoform Soluble of Catechol O-methyltransferase O-methyltransferase	0.348952	1.42612	1.72345	0.230302	0.189846	2.1489	2.73739	0.198884	0.184782	3.6447	0.608825	0.659434	3.01969	3.98285	0.698146	0.424292	0.241926	2.27492	0.248813	2.28877
IPI00746165.2	WDR1	Isoform 1 of WD repeat-containing protein 1 repeat-containing	17.3902	13.5348	19.3063	18.6215	34.2492	22.5101	27.2333	24.0273	30.88	22.7154	30.1336	31.435	22.3934	30.4675	14.0335	0.417914	0.262464	1.23534	0.328244	1.24598
IPI00953925.1	AIP	Aryl hydrocarbon receptor interacting protein	1.39939	0.424254	0.850569	0.401341	0.885031	0.650671	0.192977	0.458947	0.357521	0.417631	0.310744	0.148322	0.580191	0.565226	0.221227	0.0638618	0.11157	0.524606	0.082109	0.46097
IPI01012772.1	LRG1	cDNA FLJ54228, highly similar to Leucine-rich alpha-2-glycoprotein to	0.0765263	1.06977	0.159519	1.04812	0.511923	3.09599	0.394227	0.439611	0.799738	0.54025	0.435155	1.01094	0.469664	2.5142	0.123382	0.696999	0.425299	1.83883	0.504794	1.58883
IPI01018111.1	FKBP1A	FK506 binding protein12	0.44547	3.25893	2.88686	2.5463	4.01277	4.14652	4.23247	5.30481	4.99609	3.14727	7.83808	4.59352	3.25645	0.145541	3.67769	0.336229	0.045017	1.65982	0.391216	1.48371
IPI00789324.4	JUP	Uncharacterized protein	0.317164	0.169364	0.218348	0.233113	0.776038	0.395267	0.423197	0.608741	0.485048	0.742776	5.7132	0.169929	0.345582	0.223276	0.210925	0.524541	0.189452	1.549	0.41859	3.88729
IPI00215780.5	RPS19	40S ribosomal protein S19	22.8925	18.9667	18.5983	25.2726	21.231	16.3713	17.4445	18.5507	17.6403	19.0947	41.5968	14.6609	5.29269	19.1982	12.7048	0.773195	0.0426349	0.833027	0.687404	0.873714
IPI00009958.6	COPS5	COP9 signalosome complex subunit 5 5	1.26742	0.268296	0.424931	0.292194	0.476253	0.967209	0.22622	0.229617	0.22444	0.351282	0.169446	0.389988	0.371285	0.31745	0.218484	0.451122	0.550972	0.732391	0.247182	0.537413
IPI00941172.1	SEC61A1	Isoform 1 of Protein transport protein Sec61 subunit alpha isoform 1 transport	0.262338	0.189294	0.242037	1.66752	1.09293	1.70645	1	1.10145	1.07371	1.58271	1.67644	0.159254	1.19715	1.40027	0.976573	0.242876	0.119275	1.87148	0.348844	1.56616
IPI00297477.3	SNRPA1	U2 small nuclear ribonucleoprotein A A	0.202206	1.29657	0.747736	0.561244	0.215461	0.731282	1.39668	1.14092	2.35283	0.356383	1.03412	0.885522	0.162521	0.753459	1.90277	0.35646	0.181189	1.9774	0.353165	1.56733
IPI00221089.5	RPS13	40S ribosomal protein S13	21.4365	25.834	19.3478	0.303296	7.45754	18.9064	20.1834	12.7145	19.8656	9.47023	0.183252	4.51304	8.41988	14.5002	8.82013	0.163189	0.804794	1.0909	0.203857	0.489875
IPI00555743.2	API5	Isoform 3 of Apoptosis inhibitor 5 inhibitor	3.52983	2.99115	2.36789	2.08118	1.52594	1.98563	0.172552	1.57451	0.451688	1.39079	0.273062	0.332886	2.75356	2.1434	1.99101	0.0826179	0.0224823	0.446157	0.146487	0.599706
IPI00026089.4	SF3B1	Splicing factor 3B subunit 1 1	2.20381	1.76908	3.28319	1.3357	1.07729	2.78331	2.84415	3.73705	2.43648	2.4894	2.63481	1.12319	3.46295	2.0351	3.54356	0.237987	0.0833633	1.47795	0.326052	1.32377
IPI00943563.1	FLNB	Isoform 2 of Filamin-B	10.8551	13.9394	12.3805	22.3314	23.7787	30.7838	10.2952	10.6967	26.1656	20.8749	14.2847	40.9275	21.6141	10.8604	35.195	0.462429	0.545647	1.18648	0.266875	1.47543
IPI00024175.3	PSMA7	Isoform 1 of Proteasome subunit alpha type-7 subunit	8.32009	4.16322	7.34977	7.2145	7.40192	8.80486	8.2101	7.4907	9.53016	7.77639	10.4556	6.93694	8.93706	8.56647	4.45616	0.395156	0.11469	1.21372	0.455563	1.14231
IPI00220342.5	DDAH1	N(G),N(G)-dimethylarginine dimethylaminohydrolase 1	2.28358	1.89054	0.284677	0.328053	1.6529	0.621058	0.353725	1.58909	0.224518	0.168989	0.273782	1.43863	0.169552	0.782574	1.53613	0.34388	0.198815	0.459238	0.401243	0.652303
IPI00217960.1	PRKACA	Isoform 2 of cAMP-dependent protein kinase catalytic subunit alpha protein	0.799295	0.325764	0.342553	0.206699	0.236383	0.619553	0.765142	0.991923	0.701639	0.40416	0.564208	0.505436	0.126965	0.945075	1.98646	0.312888	0.0608857	1.82259	0.244567	2.16055
IPI00375145.1	USP5	Isoform Short of Ubiquitin carboxyl-terminal hydrolase 5 carboxyl-terminal	4.27819	5.44375	6.49577	9.0681	6.5796	4.43029	4.79124	5.18161	0.894839	7.06897	4.51492	1.43187	6.04315	5.41439	2.47615	0.178351	0.177777	0.70192	0.0773942	0.623889
IPI00640805.3	FREM2	Isoform 2 of FRAS1-related extracellular matrix protein 2 extracellular	0.357471	0.300097	0.280661	0.238374	0.973667	0.328121	0.186365	2.4402	0.475362	0.226424	0.366402	0.468981	0.319968	0.185064	0.371362	0.561333	0.535329	1.70047	0.571763	0.796076
IPI00878612.1	MYADM	Uncharacterized protein	2.87249	2.60828	1.25815	1.57429	0.243687	3.1773	0.570382	1.9833	2.37611	2.43902	3.48558	3.32534	0.386275	3.98754	4.04013	0.239997	0.552686	1.23247	0.150807	1.77925
IPI00419919.6	RPL29	RPL29;RPL29P4 Ribosomal protein L29	0.251617	0.32844	0.112633	6.74258	0.190478	3.7667	0.204873	0.281479	0.455903	0.299411	0.514057	0.191166	0.279419	0.561283	0.493082	0.66099	0.735013	0.65677	0.440468	0.267385
IPI00847986.1	RPS24	Isoform 2 of 40S ribosomal protein S24 ribosomal	2.42957	5.31401	2.25762	4.06118	3.23732	3.2664	4.38933	2.96843	7.94639	3.98423	5.98686	8.91911	1.19201	4.4266	4.64249	0.507505	0.354735	1.30377	0.298343	1.45477
IPI01015902.1	CYBB	Uncharacterized protein	0.225531	0.102906	0.182327	0.299183	0.353431	0.156041	0.138629	0.317494	0.290377	0.257439	0.225578	0.19905	0.346614	1.19748	0.472537	0.212098	0.990739	0.997079	0.240882	2.09842
IPI00966171.1	SYNPO2	Protein	0.141984	0.213958	0.210691	0.116734	0.136815	0.406211	0.0977405	0.312472	0.192043	0.578545	0.25092	0.318022	0.333787	0.192069	0.360932	0.13126	0.141928	1.93495	0.0107505	1.77489
IPI01014892.1	SGSH	Uncharacterized protein	0.432478	0.117709	0.21585	0.180817	0.614592	0.272948	0.46246	0.340211	0.382836	0.355076	0.278838	0.432808	0.216885	0.199436	0.26387	0.627932	0.626888	1.16144	0.749526	0.891377
IPI00455383.4	CLTC	Isoform 2 of Clathrin heavy chain 1 heavy	100.559	70.1611	82.3274	108.571	97.9518	65.8312	82.8425	93.3579	114.818	86.925	88.4813	97.2819	105.317	101.871	83.0898	0.787309	0.77197	0.965628	0.695515	1.03584
IPI00794678.2	MHC	MHC class I antigen	0.119394	0.176838	0.253842	0.195454	0.449346	0.415898	0.31165	0.738208	0.17912	0.346493	0.201758	0.356679	0.392564	0.29991	1.53922	0.381998	0.190562	1.66659	0.271115	2.33509
IPI00030243.1	PSME3	Isoform 1 of Proteasome activator complex subunit 3 activator	3.20095	0.8337	2.31418	1.71511	0.511888	2.13554	1.92345	1.47131	0.639759	0.189307	0.47784	1.56341	2.44223	0.342601	0.97786	0.624695	0.493193	0.741546	0.400953	0.67678
IPI00647194.1	RER1	Uncharacterized protein	0.918722	2.09087	0.92871	0.559263	1.15517	0.759646	0.806865	1.6037	0.662274	1.19665	0.983843	1.26497	0.640913	0.701493	1.70444	0.917639	0.701212	0.889682	0.831564	0.936833
IPI00979423.1	PSMC3	Uncharacterized protein	3.46199	2.46092	4.37323	5.11949	0.579588	5.48998	3.39262	4.26191	1.28165	4.95539	6.18126	2.04217	5.63885	3.88281	6.9702	0.33869	0.548971	1.21171	0.180608	1.54517
IPI00005198.2	ILF2	Interleukin enhancer-binding factor 2	15.3004	14.1311	13.5997	21.2781	24.7679	22.0591	19.1703	19.9304	17.7753	24.9281	23.3962	26.1384	12.2296	15.5033	14.2225	0.594392	0.286695	1.16599	0.89426	1.02708
IPI00183695.9	S100A10	Protein S100-A10	0.814225	8.91973	2.47976	5.01726	7.89369	3.76748	4.71612	3.12185	11.248	7.10483	10.164	0.194077	5.14653	1.50723	3.18148	0.694074	0.66295	1.19239	0.682984	0.803726
IPI00387005.1	JAGN1	GL009	0.251251	0.462716	0.372187	0.264566	0.259787	0.276299	0.227762	0.360232	0.644566	0.213484	0.328167	0.166097	0.273649	0.305131	0.738157	0.933786	0.810948	1.06944	0.720465	1.12462
IPI00003327.1	ARL3	ADP-ribosylation factor-like protein 3	0.215536	0.183761	0.329032	0.55321	2.09798	0.325696	0.284756	0.170412	0.518351	0.586336	0.512669	0.266369	0.306211	0.710595	1.01537	0.654946	0.460459	0.557935	0.780438	0.831838
IPI00644697.2	HEBP2	HEBP2 protein (Fragment)	3.20428	3.50157	3.7667	4.36899	5.63611	7.50213	3.94384	5.16869	1.76137	2.75414	6.46074	6.6539	5.87586	2.86791	1.94518	0.842494	0.908775	1.03187	0.559361	1.16242
IPI00909562.1	-	cDNA FLJ52462, moderately similar to Mus musculus proteasome (prosome, macropain) 26S subunit, non-ATPase, 8 (Psmd8), mRNA to	0.174053	0.167705	0.119975	0.264621	0.762389	0.369104	0.169964	0.212686	1.15998	0.255306	1.57026	0.297508	0.469371	0.298107	0.140437	0.659194	0.556443	1.45562	0.403419	1.86444
IPI01012026.1	CHD4	Uncharacterized protein	0.339339	0.216074	0.771212	0.43594	0.522535	0.447202	0.0794395	0.178253	0.334088	0.549656	0.11793	0.288471	0.311888	0.623863	0.0667541	0.396196	0.304768	0.695216	0.231611	0.616562
IPI00215983.3	CA1	Carbonate dehydratase I	80.5214	25.7804	43.013	37.7028	11.8935	46.4208	32.6045	56.5753	67.7242	127.557	88.9363	71.3232	101.343	20.0704	21.3905	0.454569	0.228233	1.66347	0.343261	1.52361
IPI01012045.1	GNA13	cDNA FLJ53108, highly similar to Guanine nucleotide-binding protein alpha-13 subunit to	0.272287	0.445377	0.309583	0.182631	0.997923	1.29981	0.14694	0.298045	2.15786	0.19303	0.276567	0.327894	1.48566	0.754138	0.458184	0.633685	0.411456	1.8551	0.437441	1.4958
IPI00412752.3	STAT3	signal transducer and activator of transcription 3 isoform 3 of	1.43694	1.33654	2.15472	2.07613	1.80675	2.46673	2.44545	1.54885	2.51996	2.27127	0.424489	2.02609	0.8682	2.07153	1.46541	0.0610395	0.0807949	1.27706	0.321665	0.778079
IPI00909013.1	IST1	cDNA FLJ52541	0.192629	0.08837	0.309047	0.371903	0.324592	0.181595	0.181772	0.171943	0.922423	1.29191	0.629684	0.345654	0.40915	0.450438	0.303401	0.376124	0.285064	2.13723	0.0567264	1.66207
IPI00910422.2	EIF3L	cDNA FLJ52802, highly similar to Eukaryotic translation initiation factor 3subunit 6-interacting protein to	0.876302	1.49952	1.04819	3.00799	0.26486	1.83159	0.156561	0.345942	4.08178	1.7825	2.72924	1.59394	1.83579	0.370565	0.758068	0.92544	0.731806	1.22421	0.853905	1.08821
IPI00479877.4	ALDH9A1	4-trimethylaminobutyraldehyde dehydrogenase	0.854528	0.94514	0.79482	0.673757	1.8483	0.174536	1.64832	0.931095	0.458438	1.12842	1.77375	0.63728	1.01565	2.14414	1.32225	0.356002	0.654263	0.848387	0.328562	1.34721
IPI00073772.6	FBP1	Fructose-1,6-bisphosphatase 1	0.390474	0.608867	0.435547	0.228616	0.341344	0.147001	0.251442	1.73219	0.36844	0.334853	0.291224	0.121279	0.21476	0.156605	0.259517	0.377982	0.608039	1.41354	0.0336725	0.52043
IPI00395565.4	PTGES2	Uncharacterized protein	0.349339	0.168113	0.10827	0.263925	0.27797	0.325223	0.253297	0.200295	0.186235	0.260689	0.143557	0.150455	0.142546	0.2283	0.402483	0.856656	0.820711	1.04978	0.767875	0.91412
IPI00028055.4	TMED10	Transmembrane emp24 domain-containing protein 10 10	4.76607	7.11765	8.48491	9.38073	14.5102	3.35916	9.14701	8.47081	8.3299	6.15262	8.4497	6.93166	7.94694	5.46643	4.92219	0.427449	0.392841	0.801171	0.279269	0.761799
IPI00395674.1	SNRPB	Isoform SM-B of Small nuclear ribonucleoprotein-associated proteins B and B nuclear	2.39463	1.02038	1.06047	0.331045	1.86477	0.911175	1.00055	0.233097	0.711285	0.961594	3.93128	1.09688	0.477443	0.653383	0.98808	0.51413	0.197448	0.572259	0.900342	1.07132
IPI00215919.5	ARF5	ADP-ribosylation factor 5	2.81064	3.25871	5.67964	4.21578	3.39427	1.36708	1.64217	2.1634	2.68626	2.22962	5.26999	3.25871	0.297055	4.03173	4.54916	0.10566	0.0174271	0.521128	0.708368	0.899148
IPI00096066.2	SUCLG2	Succinyl-CoA ligase [GDP-forming] subunit beta, mitochondrial beta,	2.02216	2.03186	2.3499	5.8462	4.88074	0.198912	4.10505	3.94849	2.86414	5.62362	5.74816	4.74563	4.81188	4.62066	3.8169	0.337312	0.950141	0.977196	0.184961	1.38599
IPI00473011.3	HBD	Hemoglobin subunit delta	110.868	31.7151	44.7743	72.1436	55.1275	68.0725	62.4314	101.519	109.554	186.07	157.455	106.212	139.227	43.1803	36.1845	0.341034	0.147494	1.67704	0.27708	1.53279
IPI00382476.1		Ig heavy chain V-III region WEA region	0.214121	0.102337	0.1394	0.655878	0.277912	0.296479	0.261576	0.253016	0.227652	0.370514	1.60481	0.19843	0.281518	0.325358	0.379297	0.407591	0.971087	1.0141	0.364642	2.00728
IPI00022334.1	OAT	Ornithine aminotransferase, mitochondrial	0.184488	0.298313	0.263815	0.184284	0.255731	0.67301	0.140155	0.199464	0.249342	0.347359	0.492433	0.367776	0.240082	0.423784	0.248445	0.421182	0.427124	1.35622	0.0766905	1.49374
IPI00848226.1	GNB2L1	Guanine nucleotide-binding protein subunit beta-2-like 1 beta-2-like	15.7918	19.4312	10.4657	17.4179	20.93	17.4978	20.083	18.0935	25.9219	16.8971	29.5134	18.5494	6.36473	19.2448	16.184	0.729844	0.271395	1.17203	0.787057	1.06925
IPI01014915.1	QKI	Uncharacterized protein	0.717574	0.499031	0.148363	0.313058	0.270219	0.144106	0.206727	0.397768	0.869525	0.254705	0.331757	0.180204	0.167137	0.670821	0.151911	0.831527	0.929215	0.961292	0.54061	0.770863
IPI00329801.12	ANXA5	Annexin A5	244.654	253.335	149.003	205.515	182.38	232.857	182.443	213.176	218.577	205.188	178.787	187.806	287.895	214.807	145.17	0.959016	0.875439	1.01677	0.898115	0.980268
IPI00028064.1	CTSG	Cathepsin G	0.113141	0.304645	0.147767	0.365109	0.334737	0.432538	0.286916	0.373842	0.273194	0.174319	0.23342	0.212922	0.312299	0.221841	0.323223	0.608203	0.44049	1.21765	0.896719	1.03027
IPI00856098.2		P180/ribosome Receptor	22.2017	21.2885	23.3767	26.5898	25.8878	29.7002	23.2797	22.8972	30.3137	26.5051	23.5752	22.4478	28.5358	26.0805	20.7811	0.346095	0.19483	1.11187	0.81493	1.01739
IPI01010794.1	THOC4	THO complex subunit 4	2.86354	5.57897	2.39147	4.09028	0.158011	2.05025	1.88348	2.77541	2.85264	0.58776	2.99717	0.840139	2.29342	0.339786	0.15368	0.229278	0.360713	0.672945	0.15764	0.439204
IPI00871975.2	DHRS7B	35 kDa protein	0.103006	1.52562	0.411254	1.41883	1.96428	0.890878	0.179742	1.08922	0.185784	0.822678	0.49428	1.76003	0.982957	1.03893	0.672404	0.465224	0.302746	0.584236	0.825904	0.912522
IPI00414836.6	OSTF1	Osteoclast-stimulating factor 1	0.136455	0.280875	0.158274	0.245995	0.683446	0.196841	0.216044	1.67272	9.41917	1.11234	0.270125	0.20483	0.327462	2.7488	0.287593	0.322279	0.272376	8.38321	0.404449	2.55062
IPI00982418.1	ACSL1	cDNA FLJ53511, highly similar to Long-chain-fatty-acid--CoA ligase 1 to	0.256993	0.15822	0.282829	0.212348	1.71345	0.221764	0.314406	0.179829	0.369796	1.12443	0.158879	2.08464	1.27412	0.480231	0.299038	0.571814	0.817925	0.842367	0.496461	1.63765
IPI00218176.3	POFUT1	Isoform 2 of GDP-fucose protein O-fucosyltransferase 1 protein	0.259068	0.199505	0.27327	0.155168	0.578906	0.157957	0.251355	0.291244	0.121903	0.479134	0.159929	0.252525	0.454074	0.218197	0.35133	0.927752	0.744627	0.887903	0.949397	0.97963
IPI00796515.1	MX1	Uncharacterized protein	0.180729	0.106122	0.417486	0.2271	0.4542	0.368337	0.302184	0.17117	0.475066	0.593451	0.182529	0.424872	0.462684	0.48337	0.37379	0.435114	0.320848	1.37858	0.248794	1.39087
IPI00031836.3	DRG1	Developmentally-regulated GTP-binding protein 1	2.43581	2.20259	1.50504	1.01939	0.229045	0.297261	0.302268	0.551946	1.81315	0.449253	0.213085	0.274656	1.2308	0.367063	1.2945	0.162547	0.149001	0.461843	0.132838	0.457275
IPI00170935.1	LRRC47	Leucine-rich repeat-containing protein 47	0.964598	1.05768	1.76027	1.38973	2.46007	0.607476	1.30414	1.05015	1.8533	0.537784	0.663055	1.13422	1.34957	2.09304	1.75078	0.448555	0.245967	0.701339	0.735975	0.915926
IPI00215768.3	GCLC	Glutamate--cysteine ligase catalytic subunit	0.643316	0.829607	0.341747	0.87527	0.27095	0.212112	0.139864	0.432478	0.422259	0.704123	0.29074	0.29082	0.551144	0.263651	0.32457	0.188213	0.222629	0.645359	0.119583	0.581218
IPI00640833.1	ANP32E	acidic leucine-rich nuclear phosphoprotein 32 family member E isoform 3 32	1.84881	2.51734	2.95857	0.402706	1.9696	0.42682	1.71618	0.701785	0.243029	1.33062	1.22706	0.762495	1.26225	1.77645	0.938416	0.0876332	0.0802232	0.455648	0.167432	0.615309
IPI00646779.2	TUBB6	TUBB6 protein	0.417602	0.137881	0.28529	0.357992	4.74464	3.50691	0.469761	0.383049	7.17809	0.524604	3.69123	0.281557	3.17884	2.89227	1.86775	0.618788	0.469456	2.02954	0.303563	2.00418
IPI00845473.4	GBA	cDNA FLJ50709, highly similar to Glucosylceramidase to	0.426377	0.404357	0.257492	0.735145	0.428332	0.249481	0.323806	0.560428	0.337767	0.610516	0.293026	0.406295	0.279806	0.270669	0.286141	0.277726	0.755937	0.924633	0.142968	0.682123
IPI00218606.7	RPS23	40S ribosomal protein S23	4.41925	4.36173	2.39197	0.146117	4.3268	1.26453	0.137252	1.39784	5.05496	3.83706	0.121979	9.19086	3.83307	3.06312	3.3945	0.613526	0.540368	0.747267	0.655616	1.25295
IPI00029715.4	AOX1	Aldehyde oxidase	0.575385	0.103787	0.218863	0.491547	0.387965	0.138754	0.374386	0.380482	0.267368	0.705002	0.155998	0.216644	0.337978	0.48488	0.273062	0.769453	0.893292	1.04976	0.569157	0.826173
IPI00977809.1		similar to Imuunoglobulin mu-chain D-J4-region D-J4-region	0.223075	0.12974	0.471883	0.272967	0.178971	0.306084	0.366732	0.0974091	0.276337	0.337556	0.544499	0.480264	0.193835	0.523913	0.349436	0.138028	0.784034	1.08419	0.102357	1.63864
IPI00023048.4	EEF1D	Isoform 1 of Elongation facto facto	9.72164	6.63962	8.33337	10.6782	22.6102	13.062	12.2576	11.1009	19.1703	12.2712	32.6701	14.8707	9.27984	8.8391	11.1533	0.708023	0.557318	1.17037	0.499617	1.32475
IPI00514905.4	NUP133	Uncharacterized protein	0.44615	0.155168	0.33006	0.289092	0.591931	0.342957	0.278163	2.1495	0.49579	0.427116	0.196445	0.127397	0.918085	0.293799	0.152407	0.400055	0.353266	2.03792	0.885498	0.931435
IPI00657796.1	CD9	Uncharacterized protein	0.279981	0.220523	0.543104	0.375114	17.5792	0.3643	0.278626	0.197483	0.564991	0.194306	0.336062	1.06955	0.183786	0.347793	0.135475	0.399895	0.36969	0.0842041	0.381747	0.109099
IPI00396321.1	LRRC59	Leucine-rich repeat-containing protein 59	8.6518	12.4761	7.47255	13.1985	15.7339	5.32285	14.6883	11.7925	6.10377	8.03612	12.9439	7.9856	13.6715	10.0408	6.96054	0.585261	0.350335	0.798564	0.572234	0.89692
IPI00015947.5	DNAJB1	DnaJ homolog subfamily B member 1 member	1.25466	0.873452	0.38657	0.185013	0.796364	1.23362	0.239417	0.337931	0.234897	0.218499	0.117034	1.4904	0.77255	0.275304	0.930385	0.625729	0.391859	0.647691	0.955293	1.02563
IPI00258833.1	SNX6	sorting nexin-6 isoform a	1.01368	1.07878	0.853344	0.834047	0.493082	1	0.75555	0.168942	1.28298	0.940761	0.234604	0.435728	1.06459	1.00968	0.417602	0.561706	0.909907	0.970817	0.29981	0.740056
IPI00514375.2	TXNIP	cDNA FLJ59613, highly similar to Homo sapiens thioredoxin interacting protein (TXNIP), mRNA to	0.26334	0.634591	0.351964	0.291668	0.647926	0.612508	0.308683	0.453162	0.685867	0.269695	0.275285	0.294308	0.168661	0.21944	0.4194	0.172413	0.816834	1.06414	0.136432	0.628957
IPI00290416.3	OLA1	Isoform 1 of Obg-like ATPase 1 ATPase	3.51982	2.47049	1.08696	2.26608	1.5389	0.197004	1.465	3.7782	0.154042	2.03369	0.131761	3.09728	1.15373	0.198086	0.95694	0.412378	0.438217	0.700952	0.157027	0.508883
IPI00013679.2	DUT	27 kDa protein	0.208093	0.359135	0.169611	0.280058	0.262994	0.362713	0.195332	0.409405	0.401174	0.249239	0.101658	0.419808	0.184911	0.318618	0.0775301	0.349316	0.247075	1.26406	0.644069	0.86142
IPI00789674.2	COPB2	cDNA FLJ56271, highly similar to Coatomer subunit beta to	12.4149	8.39133	8.059	6.26016	10.6775	11.447	9.79944	7.32181	14.4671	9.233	9.11663	8.6506	7.33044	8.70594	6.38417	0.254984	0.445728	1.14116	0.383514	0.877407
IPI00647418.2	NUDC	NPD011	0.251634	2.10964	0.319348	0.974004	0.451219	0.357769	0.126088	0.840139	0.274828	0.523042	0.204674	0.154	0.338048	0.447637	0.19876	0.21228	0.329254	0.516791	0.186629	0.327123
IPI00892695.1	BRE	Uncharacterized protein	0.130824	1.18386	0.253139	0.725526	0.292803	0.529646	0.445377	0.82302	0.609247	0.582165	0.372471	0.899254	0.183493	0.414775	0.14634	0.630711	0.710055	1.15595	0.644367	0.779665
IPI00419802.4	HIBCH	Isoform 1 of 3-hydroxyisobutyryl-CoA hydrolase, mitochondrial hydrolase,	0.173295	0.165971	0.801903	0.158582	0.867479	0.550151	0.468396	0.554439	0.787908	0.24125	0.326465	0.302708	0.342933	0.473488	1.73556	0.760918	0.656514	1.20068	0.549691	1.46784
IPI00013068.1	EIF3E	Eukaryotic translation initiation factor 3 subunit E 3	0.196309	0.258279	1.95775	0.315694	0.237204	0.448911	0.253191	0.50118	0.291042	0.692987	0.136228	0.245042	0.186895	0.655288	0.202122	0.59667	0.678164	0.73765	0.427939	0.480762
IPI00642256.2	CAPZB	Isoform 2 of F-actin-capping protein subunit beta protein	0.377801	3.59701	3.24698	6.85901	4.40273	3.4295	5.62245	3.33526	1.70031	4.53311	9.61975	4.80088	5.15689	11.077	5.93439	0.0425861	0.982878	1.00742	0.0600671	1.97954
IPI00009822.1	SRP54	Signal recognition particle 54 kDa protein kDa	2.26388	0.391233	0.659754	0.492126	0.217849	0.244804	0.575944	0.229045	0.668547	0.434913	0.567188	0.304286	0.305427	0.207833	0.221595	0.311657	0.377282	0.53499	0.265415	0.399104
IPI00297982.7	EIF2S3	Eukaryotic translation initiation factor 2 subunit 3 2	1.45417	2.91319	1.99419	2.3938	3.36755	0.205998	0.184693	4.24275	4.47721	0.771373	0.341415	1.3961	2.40744	2.35871	1.88635	0.712999	0.683424	0.815154	0.180417	0.69208
IPI00062884.4	CTTN	src substrate cortactin isoform b b	2.40961	3.61501	2.13421	3.10523	3.09534	2.25215	0.193084	2.55992	4.74497	5.13299	6.0285	4.29364	4.1193	1.8197	2.64231	0.604064	0.915804	1.03647	0.292778	1.31645
IPI00399170.1	UPF1	Isoform 2 of Regulator of nonsense transcripts 1 of	0.112758	1.05651	0.368491	0.562802	0.383793	0.289513	0.224518	0.193513	0.321524	0.274238	0.448817	0.282966	0.146696	0.310077	0.254088	0.205598	0.208464	0.524606	0.263992	0.580693
IPI00981395.1	PARP1	cDNA FLJ53442, highly similar to Poly (ADP-ribose) polymerase 1 to	2.57648	4.53342	1.08425	5.22489	5.48085	2.91198	1.45186	2.90231	4.67608	2.44172	4.14364	4.64507	2.88486	4.33881	3.67514	0.428635	0.394753	0.76106	0.867652	1.04167
IPI00292135.1	LBR	Lamin-B receptor	0.692411	0.606046	0.187869	0.187427	0.227006	0.168288	0.216419	0.235598	0.411653	0.78057	0.0999673	0.121827	1.58667	0.622782	0.212465	0.789577	0.913755	0.953581	0.642664	1.39087
IPI00165261.6	SCFD1	Sec1 family domain-containing protein 1 1	0.721064	1.93536	1.34025	0.257849	0.452158	1.3251	1.97904	1.43157	1.74557	1.18591	0.378929	0.887304	0.38907	1.11915	2.16986	0.272552	0.135617	1.629	0.918559	1.05049
IPI00025086.4	COX5A	Cytochrome c oxidase subunit 5A, mitochondrial 5A,	3.94493	4.50335	4.1173	5.85594	6.05657	3.81161	5.98479	5.32802	8.2781	6.44553	5.03712	7.20451	6.32559	3.97568	3.82696	0.486055	0.250758	1.21938	0.648113	1.07728
IPI00303476.1	ATP5B	ATP synthase subunit beta, mitochondrial mitochondrial	101.652	125.401	125.201	153.32	136.817	91.7159	122.09	111.965	165.708	126.509	105.471	114.865	125.635	112.408	102.765	0.43594	0.750532	0.962013	0.135334	0.873526
IPI00647118.1	EIF1AY	Uncharacterized protein	0.116726	0.701882	0.663929	0.310443	1.01375	0.686295	0.819548	0.473029	0.696261	0.277239	1.63478	0.260183	0.194535	0.960795	0.847156	0.673659	0.87922	1.05189	0.500942	1.38861
IPI00977658.1	EIF3H	Eukaryotic translation initiation factor 3 subunit H 3	0.79935	0.895832	0.2581	0.523804	0.262684	0.242827	1.8015	0.278606	0.265319	0.58362	0.413598	0.427679	0.865257	0.2926	1.39571	0.91466	0.800816	1.15772	0.606893	1.2391
IPI00029739.5	CFH	Isoform 1 of Complement factor H factor	0.663515	1.11311	0.296993	0.54145	0.397768	1.47253	1.59793	1.07237	3.36429	1.4573	25.5544	1.13532	0.243265	0.944813	0.295125	0.459803	0.0386939	2.9754	0.36979	9.35096
IPI00941907.1	STRAP	Serine-threonine kinase receptor-associated protein	1.8202	1.45619	1.21285	1.89737	0.313058	2.60611	2.70889	0.395212	0.337042	3.24226	2.84081	1.17821	3.1974	1.7087	0.866817	0.623685	0.477623	1.38656	0.29018	1.46156
IPI00742682.2	TPR	Nucleoprotein TPR	2.40861	2.71076	1.05044	0.557251	2.22962	3.4257	2.3499	3.74924	0.548172	6.60427	0.817505	1.38233	3.28957	0.374153	0.864957	0.14175	0.206241	1.86199	0.519607	0.751228
IPI00790462.1	PTGES3	cDNA FLJ50819, highly similar to Prostaglandin E synthase 3 to	2.70757	5.85147	2.83549	3.32511	7.55536	1.36462	4.42354	3.29391	4.79357	3.41219	8.31491	3.0887	0.860472	4.87297	5.74457	0.681448	0.408944	0.776109	0.940825	1.02723
IPI00872762.2	SUCLG1	Succinyl-CoA ligase [GDP-forming] subunit alpha, mitochondrial alpha,	0.88497	0.961061	2.50759	2.15442	2.29772	0.509375	1.8891	0.829032	1.22859	2.14652	1.50828	1.76492	0.482299	2.24249	2.19056	0.625877	0.371253	0.749807	0.800142	0.929908
IPI00939515.1	NRP1	Uncharacterized protein	0.370951	0.241936	0.552865	0.511321	0.283437	0.119651	0.239384	0.325967	0.590169	0.990686	0.85922	0.156095	0.312277	0.265172	0.146899	0.832887	0.728478	1.15575	0.771857	0.887353
IPI00217975.4	LMNB1	Lamin-B1	26.2419	29.0024	24.0056	38.5458	31.7085	31.2503	27.6805	30.1002	31.459	34.6072	48.6646	35.8947	30.0501	27.9854	28.9361	0.514483	0.700225	1.03741	0.370213	1.14733
IPI00018931.6	VPS35	Vacuolar protein sorting-associated protein 35 35	5.15796	9.04989	8.36868	9.28885	6.58781	5.57434	9.02045	8.15452	8.64281	9.44074	3.69379	4.7171	8.67823	7.60844	6.46926	0.245461	0.660802	1.06188	0.262668	0.810513
IPI00074489.1	NDUFB10	Uncharacterized protein	1.56331	0.905571	1.39107	0.533145	0.21696	0.241735	0.5958	0.51164	0.218166	0.511923	1.75808	0.984048	0.137843	0.747632	0.687962	0.232729	0.117045	0.451028	0.875835	0.936119
IPI00024821.1	PSMD14	26S proteasome non-ATPase regulatory subunit 14 subunit	1.19831	0.182049	1.58788	1.5017	0.256033	0.411026	0.206813	0.573077	0.203768	0.470217	1.25076	0.938091	0.653519	0.234685	0.376103	0.196089	0.13344	0.394607	0.498446	0.730676
IPI00024920.1	ATP5D	ATP synthase subunit delta, mitochondrial mitochondrial	0.232887	1.05555	1.62902	0.177169	1.67272	0.150925	0.344243	0.38101	2.29231	1.83668	2.23767	1.41265	2.61734	1.34192	0.501666	0.412577	0.933178	1.04988	0.212255	1.70142
IPI00003348.3	GNB2	Guanine nucleotide-bin	1.39339	0.924663	0.421937	0.109333	2.61118	0.19725	3.03417	3.01634	6.11308	4.19102	6.23375	6.59558	0.258082	3.9845	2.25793	0.120774	0.0838983	3.0312	0.0810054	3.53994
IPI00216631.1	SNTB2	Isoform 2 of Beta-2-syntrophin	0.283339	0.138667	0.209366	0.328508	0.132761	0.282398	0.665772	0.493014	0.142773	0.319769	0.305702	0.311175	0.360307	0.239517	0.203415	0.190842	0.155877	1.74232	0.211165	1.29971
IPI00219021.2	PGR	Isoform A of Progesterone receptor receptor	0.190122	0.206484	0.220967	0.269657	0.185373	0.116508	0.368133	0.398127	0.289874	0.522028	0.219653	0.302247	0.298045	0.178043	0.166328	0.129267	0.137651	1.57996	0.593941	1.08551
IPI00021794.8	CTSA	Lysosomal protective protein	0.532074	0.222349	0.628332	0.568251	0.864657	0.320146	0.574071	0.118618	0.593986	0.616896	0.63402	0.400146	0.710103	1.31421	0.521269	0.327864	0.428433	0.789766	0.445918	1.27137
IPI01010188.2	AKAP9	Uncharacterized protein	0.377356	0.123296	0.134735	0.321703	0.311413	0.375608	0.247998	0.271872	0.495377	0.276299	1.01868	0.267962	0.27561	0.242087	0.318795	0.4672	0.285307	1.31427	0.328744	1.67373
IPI00012912.1	CPT2	Carnitine O-palmitoyltransferase 2, mitochondrial	0.167519	0.115775	0.157181	0.418239	0.121691	0.124119	0.147083	0.156866	0.204944	0.378719	0.142398	0.175397	0.679855	0.828285	0.135475	0.29686	0.933629	1.03195	0.273508	2.00061
IPI00941614.1	GORASP2	Isoform 1 of Golgi reassembly-stacking protein 2 reassembly-stacking	1	0.466516	0.51306	0.997439	1.0752	0.50705	1.33533	0.61994	0.481965	0.263067	0.502536	0.147655	0.66508	0.807425	0.832545	0.567006	0.47705	0.791507	0.262644	0.729291
IPI00944640.1	ASPH	aspartyl/asparaginyl beta-hydroxylase isoform f	0.363266	0.815524	0.514485	0.57256	0.210428	0.208425	1.41353	0.418732	0.414804	0.566285	0.201493	0.176777	0.558953	0.283712	0.260183	0.324909	0.65747	1.2203	0.148856	0.598126
IPI00219034.3	NDUFA8	NADH dehydrogenase [ubiquinone] 1 alpha subcomplex subunit 8 alpha	1.80776	1.62091	0.878065	0.53585	0.955018	0.208656	0.343719	0.348275	0.289032	1.60926	4.28323	0.0978557	0.213144	1.67644	2.06337	0.306835	0.130764	0.482777	0.553912	1.4375
IPI00642982.1	LONP1	Lon protease homolog	0.845748	0.311737	1.11134	0.754765	2.16535	0.296027	0.170188	0.308534	0.330243	1.0071	0.134502	2.1006	0.810172	0.515341	1.61183	0.258461	0.12579	0.407036	0.994637	0.996821
IPI00296165.7	C1R	Complement C1r subcomponent	0.101454	0.0927313	0.356729	0.576623	0.477873	0.588902	0.656606	1.04449	0.143896	0.442454	2.40311	0.21699	0.321703	0.460509	0.898693	0.355586	0.192928	1.79166	0.256428	2.67907
IPI00027463.1	S100A6	Protein S100-A6	11.0594	5.41965	6.85141	0.243366	4.02113	7.73714	30.1879	3.82802	17.5172	17.4445	38.4737	0.355175	0.65506	12.7489	0.487948	0.424099	0.100101	2.78003	0.540262	1.91052
IPI00900380.1	MCTS1	Isoform 2 of Malignant T cell-amplified sequence 1 T	0.182163	7.08565	0.201842	0.281323	0.267331	0.232758	0.282046	0.100809	0.341061	0.260129	0.194805	0.258727	3.67489	0.471556	0.239019	0.567669	0.37724	0.151753	0.692398	0.603493
IPI01009357.1	FKBP7	Isoform 3 of Peptidyl-prolyl cis-trans isomerase FKBP7 cis-trans	0.165076	0.865077	0.923894	0.285725	0.260255	0.368925	0.919996	0.191538	1.68658	0.333486	0.248187	0.817449	0.277835	0.206742	0.210662	0.477654	0.553598	1.40019	0.483662	0.704342
IPI00013415.1	RPS7	40S ribosomal protein	25.7018	20.4255	31.2525	22.3856	29.6159	0.189032	24.109	16.9875	42.4914	8.03835	4.77434	13.6649	24.9022	61.1212	11.2714	0.76402	0.368461	0.709649	0.802075	0.894518
IPI01015427.1	PSMC1	cDNA FLJ58247, highly similar to 26S protease regulatory subunit 4 to	1.92599	1.20414	0.122836	1.7719	2.67233	3.03859	2.89869	3.07588	0.1877	3.70455	0.364705	1.51477	2.29437	1.41108	0.159088	0.142055	0.205039	1.67664	0.519326	0.746248
IPI00025796.3	NDUFS3	NADH dehydrogenase [ubiquinone] iron-sulfur protein 3, mitochondrial protein	2.04542	4.88277	5.1476	4.74892	5.09506	4.74991	3.29071	4.37748	7.59474	7.53601	2.42066	3.43426	5.33172	4.20323	2.39546	0.174058	0.320391	1.2568	0.337984	0.811383
IPI00291867.4	CFI	Complement factor I	0.26314	0.372807	0.383953	1.19532	0.256601	1.27695	0.173403	0.15932	3.20961	0.522753	4.07472	3.0729	0.29441	0.956542	0.436786	0.309316	0.384174	2.16117	0.172333	3.57443
IPI00178047.7	PELP1	Uncharacterized protein	0.222241	0.254652	0.28531	0.21344	0.623646	0.457454	0.135156	0.832026	0.539203	0.257528	0.203754	0.147655	0.432838	0.3291	0.115743	0.318531	0.413689	1.38897	0.469322	0.768523
IPI00443657.2	CIRBP	Uncharacterized protein	3.17026	4.01862	6.06959	4.19276	2.03017	1.68378	3.54233	3.70558	3.21162	3.52763	4.72856	1.8168	6.24369	3.13138	5.06162	0.488067	0.353865	0.804405	0.776478	1.07703
IPI00025491.1	EIF4A1	Eukaryotic initiation factor 4A-I	26.3348	22.894	18.2446	24.4252	23.401	26.6193	25.3164	19.9111	33.759	21.8521	30.3726	26.3915	23.3621	22.7123	21.3387	0.635916	0.407191	1.10545	0.42247	1.07699
IPI00413958.5	FLNC	Isoform 2 of Filamin-C	0.261993	0.342055	0.352452	0.54878	2.76657	0.64287	0.210516	0.367369	0.237237	0.537635	0.955879	4.2187	0.203035	0.226048	0.242692	0.598471	0.400557	0.467157	0.740552	1.36858
IPI01009380.1	SEC16A	Uncharacterized protein (Fragment)	0.137376	0.308812	0.108751	0.354412	0.292073	0.461883	0.285053	0.232548	0.39251	0.530491	0.202965	0.956873	0.147983	0.373583	0.212716	0.515457	0.0939625	1.58352	0.419647	1.57656
IPI00010865.1	CSNK2B	Casein kinase II subunit beta	0.142675	0.259625	0.283614	1.8045	0.249308	0.273801	0.89094	0.352892	0.343695	0.440771	0.455714	1.08749	0.188914	0.152597	0.152936	0.901131	0.803786	0.840267	0.711137	0.743743
IPI00939491.1	CARS	Isoform 2 of Cysteinyl-tRNA synthetase, cytoplasmic synthetase,	0.304898	0.26409	0.232161	0.29388	0.347793	0.313427	0.169376	0.482667	0.153989	0.353823	1.02321	0.494143	0.408753	0.127291	0.854291	0.0988555	0.928161	1.02111	0.141584	2.01528
IPI00456013.1	ATP5J2	ATP synthase subunit f, mitochondrial isoform 2c mitochondrial	2.167	4.85813	0.200893	4.95093	6.29323	2.60286	2.99925	3.70944	4.52526	4.81588	2.13746	1.36699	2.46092	2.03821	1.11876	0.128135	0.976479	1.00988	0.166271	0.493896
IPI00220637.5	SARS	Seryl-tRNA synthetase, cytoplasmic	3.37714	1.99543	1.88505	2.76868	3.348	2.78041	3.57465	2.03792	2.72773	3.15622	6.86139	2.48733	2.79084	3.8944	2.46383	0.381944	0.670858	1.06749	0.300958	1.38308
IPI00005809.7	SDPR	Serum deprivation-response protein	0.2552	0.653201	0.284145	0.26192	0.555169	0.932774	0.314362	0.439367	0.873149	0.396475	0.164243	1.7182	0.480897	0.337346	0.129695	0.755972	0.259883	1.47098	0.617031	1.40841
IPI00183046.3	PTPN6	cDNA FLJ60320, highly similar to Tyrosine-protein phosphatase non-receptor type6 to	0.474375	0.119999	0.0855078	0.416244	0.228585	0.447451	0.475758	0.234799	0.348541	0.875695	0.144466	0.192243	1.06977	0.227888	0.246678	0.517168	0.155521	1.79831	0.582876	1.41997
IPI00024773.1	FARP1	Isoform 1 of FERM, RhoGEF and pleckstrin domain-containing protein 1 RhoGEF	0.196568	0.177464	0.181507	0.367318	0.329717	1.17977	1.59416	0.164265	0.143031	2.08046	0.289995	0.138312	1.42356	0.242911	0.408498	0.140246	0.112729	4.12086	0.349896	1.9985
IPI00016077.1	GBAS	Protein NipSnap homolog 2	0.172671	0.789603	0.260183	0.264548	0.179742	0.436091	0.122165	0.333232	0.329923	0.134074	0.124223	0.201744	0.332655	0.180454	0.447885	0.791277	0.651176	0.813251	0.57968	0.772139
IPI00014577.1	RAB18	Ras-related protein Rab-18	0.606677	0.758068	0.70745	0.563817	0.590169	0.40562	1.10865	0.394939	0.430475	0.177206	0.211129	1.22315	0.469046	0.658657	0.827712	0.638408	0.426916	0.780144	0.859747	1.05068
IPI00472633.7	TRA2B	Isoform 3 of Transformer-2 protein homolog beta protein	0.938872	0.0957157	0.371775	0.272911	0.756703	0.448351	0.169658	0.224611	0.688916	0.247346	0.550266	0.874239	0.226738	0.833989	0.541488	0.400972	0.497978	0.730254	0.563582	1.24251
IPI00010463.5	GTPBP1	GTP-binding protein 1	0.310421	0.249049	0.183404	0.163097	0.671752	0.33981	0.166466	0.319348	0.900938	0.429878	0.387052	0.193969	0.294084	0.337673	0.137614	0.476781	0.4797	1.36681	0.676184	0.855912
IPI00171611.7	HIST2H3D	Histone H3.2;Histone H3/m	12.8456	21.4143	35.4521	27.1034	15.8719	0.293351	25.8699	96.0491	0.387401	0.146026	34.7346	0.110921	8.97057	57.4685	2.88166	0.978726	0.920292	1.08926	0.89016	0.924384
IPI00216472.1	CLTB	Isoform Non-brain of Clathrin light chain B light	0.990274	0.492809	0.43176	0.248222	0.967746	0.143011	0.585159	0.197182	0.611956	0.843523	1.82766	0.879588	0.43173	0.297694	1.26699	0.279025	0.475498	0.760452	0.359501	1.50238
IPI00646899.2	SNORA70	Putative uncharacterized protein RPL10	2.39695	3.21763	2.44376	5.82598	3.88685	3.81214	5.9028	3.85599	3.41811	5.96284	4.45307	2.07168	4.54254	6.36826	0.944551	0.570588	0.252514	1.29152	0.918898	1.03427
IPI00985037.1	MCCC1	cDNA, FLJ79327, highly similar to Methylcrotonoyl-CoA carboxylase subunit alpha, mitochondrial to	0.525732	0.0845823	0.459584	0.168766	0.850333	0.114174	0.176019	0.273649	0.278105	0.384432	0.297199	0.461371	0.233711	0.263724	0.14533	0.376559	0.286508	0.587065	0.388909	0.670817
IPI00845339.1	HSPA1B	highly similar to Heat shock 70 kDa protein 1	94.2421	83.2512	101.273	118.34	155.546	117.458	100.629	124.207	163.438	115.72	116.493	125.488	105.398	84.0922	85.4613	0.395538	0.427237	1.12449	0.650054	0.935365
IPI00031131.4	C20orf3	Isoform 1 of Adipocyte plasma membrane-associated protein plasma	1.60214	3.40723	1.65542	1.75394	1.46683	3.20139	0.184565	2.33335	2.73	1.65726	3.63259	0.316373	2.09914	3.35404	0.219334	0.992417	0.94654	1.02236	0.950105	0.973286
IPI01025047.1	SRSF5	cDNA FLJ57379, highly similar to Splicing factor, arginine/serine-rich 5 to	0.133601	0.170566	0.68179	0.311888	0.368644	0.615572	0.184757	0.285606	0.398348	0.389097	0.910102	0.260761	0.374049	0.245331	0.140993	0.932616	0.741729	1.12415	0.760564	1.15887
IPI00019038.1	LYZ	Lysozyme C	0.127591	0.380508	0.0848877	0.208989	0.270481	0.183341	0.345079	0.32599	0.544612	1.82868	0.711778	0.182567	0.16566	0.906513	0.367598	0.32924	0.227667	3.00963	0.1678	2.17642
IPI00399007.7	IGHG2	Putative uncharacterized protein DKFZp686I04196 (Fragment) (Fragment)	57.9044	60.5729	31.4198	71.7596	27.2635	95.1611	65.7856	37.2044	105.288	51.3467	207.361	46.4852	22.2541	99.388	42.4179	0.543048	0.214935	1.4253	0.377557	1.67888
IPI00783781.2	NUP205	Nuclear pore complex protein Nup205 Nup205	0.336855	0.160162	0.157792	0.534662	0.288972	0.305914	0.298644	0.239169	0.318486	0.336458	0.0651857	0.194037	0.0868338	0.404469	0.29759	0.452817	0.957203	1.01368	0.388594	0.708932
IPI00922289.1	PYCR1	cDNA FLJ56284, moderately similar to Pyrroline-5-carboxylate reductase 1 to	0.682831	0.177304	0.236367	0.486395	0.412967	0.395212	0.199326	0.4341	0.493903	0.190399	0.190809	0.264676	0.270594	0.27257	0.217909	0.259831	0.622397	0.858245	0.161177	0.60954
IPI00005578.1	EHD4	EH domain-containing protein 4	0.403964	0.206398	0.300867	0.158802	0.744065	0.494691	0.155987	0.79218	1.01185	1.39881	0.381724	0.207934	0.775017	0.964264	0.104879	0.247714	0.137762	2.12421	0.546534	1.34161
IPI00022463.2	TF	Serotransferrin	367.525	232.583	194.672	257.174	175.752	301.413	407.004	241.252	694.244	327.488	1064.6	370.184	113.709	293.558	173.057	0.545337	0.141547	1.60576	0.41476	1.64136
IPI00942032.1	AGR2	Anterior gradient protein 2 homolog homolog	4.7856	10.2852	4.51273	2.07657	6.83054	6.8709	3.77375	4.13876	6.48767	8.78596	0.283575	5.78814	10.0067	23.8729	6.91103	0.525913	0.855317	1.05498	0.420242	1.64483
IPI00028006.1	PSMB2	Proteasome subunit beta type-2	0.123939	1.46876	1.25902	0.373816	0.1981	1.88322	0.174682	0.253806	0.272325	0.48707	0.260273	0.206727	1.4653	1.45841	0.393954	0.944587	0.873225	0.897029	0.862661	1.10545
IPI00927674.1	RAB5A	cDNA FLJ51867, highly similar to Ras-related protein Rab-5A to	0.122887	0.378116	0.246575	0.456156	0.152534	0.539689	0.154032	1.59284	0.451876	0.476154	0.299723	0.396337	0.154942	0.202852	0.285983	0.16639	0.210213	2.37017	0.966972	0.987885
IPI00642244.2	KIAA0090	Isoform 4 of Uncharacterized protein KIAA0090 protein	0.186727	0.249221	0.421265	0.437059	0.310658	0.4825	0.240399	0.410997	0.159674	0.229474	0.112173	0.216149	0.218045	0.421557	0.164117	0.442915	0.838457	0.948977	0.222206	0.705353
IPI00983214.1	CD81	Uncharacterized protein	14.2106	16.6206	11.409	10.3116	13.8902	13.1273	15.7208	11.7322	18.9615	16.5161	7.62322	16.0433	11.2262	11.1603	14.189	0.253276	0.288892	1.14472	0.516263	0.906684
IPI00220827.5	TMSB10	Thymosin beta-10	3.9071	1.05577	5.26561	0.179418	0.2131	0.212834	3.96577	5.41289	0.522463	3.03774	0.248342	1.62507	4.74333	0.219455	0.152333	0.676815	0.734714	1.23827	0.608765	0.657991
IPI00293088.7	GAA	Lysosomal alpha-glucosidase	3.11493	0.619296	1.98701	4.3214	4.8249	0.392727	2.51316	4.61874	0.52326	4.72987	0.185026	3.51056	0.203105	2.21914	3.00174	0.608861	0.740282	0.859439	0.299841	0.613388
IPI00072377.1	SET	Isoform 1 of Protein SET SET	0.202192	0.205584	0.157891	0.632045	1.2585	0.0739913	0.238325	0.125739	0.40279	0.378221	0.284559	0.38228	0.606214	0.2708	0.131424	0.448445	0.314749	0.49632	0.517176	0.682058
IPI00013179.1	PTGDS	Prostaglandin-H2 D-isomerase	1.07333	0.370026	1.20631	0.52785	0.548742	0.393982	0.268129	2.18283	0.385392	0.68639	0.426583	1.65623	0.384885	0.293453	0.227352	0.881241	0.926149	1.05111	0.653357	0.80201
IPI00945375.1	CUTA	Uncharacterized protein	1.58667	1.29729	2.35904	3.27342	4.79689	0.407028	2.60756	2.72622	4.78162	3.23777	3.89683	2.54735	0.331619	0.520511	0.932193	0.459567	0.927116	1.03357	0.307831	0.618066
IPI00939160.2	HBG2	G-gamma globin Paulinia variant	0.208946	0.289312	0.435064	0.235598	0.581399	0.368772	0.352184	1.95247	0.21381	0.409575	0.631739	0.336972	0.338048	0.247414	0.302163	0.48078	0.40057	1.88355	0.832234	1.06057
IPI00925346.1	BDH1	Uncharacterized protein	0.932257	0.136191	1.967	0.256583	0.381988	0.339245	2.7808	0.48849	2.79181	0.38845	0.377356	2.4832	0.278915	0.154727	0.315082	0.559217	0.388815	1.84778	0.982015	0.982378
IPI00646339.1	EPS15L1	cDNA FLJ14104 fis, clone MAMMA1001198, highly similar to Epidermal growth factor receptor substrate 15-like 1 MAMMA1001198,	0.17701	0.11089	0.154374	0.137357	0.631958	0.273877	0.347576	0.449253	0.450781	0.326578	0.111021	0.434311	0.218499	0.606467	0.21198	0.53942	0.275683	1.52533	0.592109	1.30595
IPI00022394.2	C1QC	Complement C1q subcompo	0.882091	0.408271	0.556479	0.21717	0.229553	0.646356	1.04044	0.495927	1.56558	0.628289	1.76027	0.231166	0.249602	0.779219	0.657152	0.385663	0.115361	1.90821	0.401014	1.60336
IPI00009104.7	RUVBL2	RuvB-like 2	2.69185	3.45527	3.16872	3.70532	3.27955	2.82157	1.54531	2.3628	2.90795	4.23775	3.30649	3.20939	3.02283	2.15367	3.38863	0.538545	0.347566	0.851213	0.411505	0.925174
IPI00642042.3	TPM3	Putative uncharacterized protein DKFZp686J1372	9.56788	13.5978	22.7848	13.5217	9.86829	14.1703	11.2699	11.3451	14.0432	15.3834	12.9645	6.76083	13.8922	15.4421	9.22213	0.656215	0.814441	0.954882	0.466718	0.840517
IPI01011313.1	PBXIP1	Uncharacterized protein	0.117783	0.158571	0.259068	0.367496	0.398431	0.281089	0.228268	0.49107	0.347311	0.183176	0.29179	0.0635969	0.0801919	0.257207	0.178847	0.228764	0.568062	1.17641	0.266617	0.669792
IPI00011730.3	EMILIN3	EMILIN-3	0.277719	0.0936031	0.288912	0.260165	0.717674	0.181268	0.166235	0.362512	3.9754	0.36844	0.441046	0.43882	0.158274	0.327553	2.59962	0.632865	0.411859	3.08524	0.369675	2.42072
IPI00004671.2	GOLGB1	Golgin subfamily B member 1 1	0.424342	0.104314	0.84839	0.864178	0.227226	0.447668	0.398624	0.396502	0.50059	0.265264	0.359609	0.415379	0.538195	0.417255	0.390556	0.778537	0.596124	0.813728	0.684088	0.859241
IPI01024738.1	CNOT1	Uncharacterized protein	0.210706	0.121178	0.332102	0.440832	0.41792	0.147942	0.325696	0.365692	0.388234	0.12685	0.416561	0.327462	0.317758	0.34587	0.327054	0.559027	0.694153	0.88946	0.536897	1.1392
IPI00643577.1	ME2	NAD-dependent malic enzyme, mitochondrial isoform 2 precursor isoform	0.128461	0.202796	0.323514	0.562997	0.493082	0.255731	0.265319	0.358216	0.354781	0.561205	0.289633	0.0994352	0.149872	0.181444	0.537039	0.549283	0.869896	1.04933	0.44803	0.73497
IPI00955815.2	PDHA1	pyruvate dehydrogenase E1 component subunit alpha, somatic form, mi subunit	2.53925	2.18935	0.203049	2.8564	1.74993	1.55649	1.21529	1.40581	2.14682	1.66163	1.29963	0.970298	2.17618	1.37392	4.09539	0.801958	0.554726	0.837289	0.920328	1.03957
IPI01014460.1	NDUFS2	cDNA, FLJ78876, highly similar to NADH-ubiquinone oxidoreductase 49 kDa subunit, mitochondrial to	1.61038	0.515985	0.770625	0.807929	1.76504	0.480964	0.458375	0.399232	6.70901	0.0869	1.97986	2.52503	0.484544	1.58557	1.02094	0.877847	0.70071	1.48712	0.36027	1.38867
IPI00221093.7	RPS17	40S ribosomal protein S17	9.14637	5.44828	5.00302	6.97262	2.97461	3.85679	6.09658	6.15987	4.64056	5.84539	13.12	7.93923	5.019	6.36826	3.79237	0.493267	0.621729	0.900297	0.509296	1.22657
IPI00182289.6	RPS29	40S ribosomal protein S29	0.155944	0.162375	0.12181	0.168486	0.432628	0.198595	0.277873	0.23376	0.408271	0.378693	0.23462	0.200406	0.281401	0.435366	0.0817521	0.485187	0.231011	1.43789	0.64676	1.18469
IPI00005537.3	SLC25A10	cDNA FLJ60124, highly similar to Mitochondrial dicarboxylate carrier to	2.11536	2.03059	0.970164	2.10979	1.67006	0.783334	1.04812	0.842413	1.22264	1.26129	3.93455	2.28548	1.04449	0.230382	2.37528	0.237569	0.0226733	0.579791	0.782775	1.10951
IPI00017283.2	IARS2	Isoleucyl-tRNA synthetase, mitochondrial	1.00856	0.313492	0.604955	0.373195	0.146808	0.213632	0.744632	0.155933	0.412624	0.293819	0.420506	0.5705	0.227857	0.196963	0.480064	0.701121	0.513011	0.744026	0.531596	0.774778
IPI00982696.1	NDUFB6	NADH dehydrogenase [ubiquinone] 1 beta subcomplex subunit 6 isoform 3 beta	0.153382	0.443929	0.318044	0.652794	0.431072	0.302457	0.242625	0.232967	0.537337	1.34118	0.465967	0.234783	0.91187	0.699163	1.98192	0.341567	0.583928	1.3288	0.208462	2.14769
IPI00985234.1	MRPS27	cDNA FLJ54799, highly similar to Mitochondrial 28S ribosomal protein S27 to	0.350941	0.172995	0.221365	0.478171	0.243012	0.341037	0.0925772	0.182707	0.679714	0.21567	0.343266	0.428837	0.182681	0.227462	0.469827	0.934729	0.940379	1.03084	0.646506	1.12655
IPI00012011.6	CFL1	Cofilin-1	146.789	96.8648	92.5846	127.169	152.874	85.0359	133.593	103.623	142.045	110.968	91.1203	69.8312	135.214	146.038	75.3168	0.572267	0.625254	0.933445	0.353141	0.839747
IPI00021857.1	APOC3	Apolipoprotein C-III	2.25777	1.73436	1.16821	1.68681	1.11837	5.77932	2.04075	0.199505	3.95259	1.68028	4.70241	2.32898	1.92292	2.00264	1.11466	0.486253	0.310065	1.71394	0.257006	1.51548
IPI00219678.3	EIF2S1	Eukaryotic translation initiation factor 2 subunit 1 2	1.94787	1.40688	1.68904	1.5619	2.04387	2.19801	2.12535	1.55283	1.66071	1.92052	1.95206	2.09623	1.36727	2.64983	1.47529	0.712168	0.377446	1.0934	0.518118	1.10303
IPI00796552.4	ACE	cDNA FLJ53482, moderately similar to Angiotensin-converting enzyme, somatic isoform to	0.148641	0.0888983	0.225281	0.261521	0.650671	0.384485	0.13348	0.244143	0.318441	0.239135	0.175811	0.358613	0.282691	0.434461	0.301724	0.875728	0.921515	0.959763	0.752444	1.12966
IPI00877947.1	TTC38	Protein	0.171075	0.203204	0.68179	0.516844	0.341913	0.264988	0.432478	0.267609	0.697855	0.248411	0.333949	0.349436	0.259733	0.181671	0.114872	0.405977	0.995826	0.998181	0.253908	0.647401
IPI00103483.1	COBRA1	Negative elongation factor B	0.168883	0.151753	0.251599	0.19358	0.187362	0.335736	0.423167	0.280583	0.308812	0.181721	0.293392	0.414861	0.370488	0.132283	0.0686451	0.244738	0.0390939	1.60518	0.393385	1.34253
IPI00978986.1	NUP160	140 kDa protein	0.151291	0.548172	0.189032	0.253648	0.42264	0.210224	0.630383	0.548514	0.44476	0.462588	0.185656	0.43161	0.19799	0.36478	1.23945	0.602833	0.193002	1.4676	0.448842	1.54621
IPI00304082.8	ISOC1	Isochorismatase domain-containing protein 1	0.824048	1.18575	2.21776	0.182024	0.42682	0.178117	1.56667	0.22115	2.94425	0.459871	0.294512	0.16372	1.10949	0.143478	1.97192	0.848708	0.872243	1.11034	0.659403	0.761542
IPI00797738.1	COX6B1	Cytochrome c oxidase subunit 6B1 6B1	1.97548	2.82001	2.45343	2.51368	3.51908	0.227936	3.26345	1.85961	7.7061	0.211672	1.60815	1.68389	0.348493	3.19076	1.84433	0.687332	0.99862	0.999028	0.123268	0.653203
IPI00939159.6	CAP1	Adenylyl cyclase-associated protein	3.26436	4.24481	11.549	9.24838	7.46375	6.71785	7.94749	9.0832	12.4201	12.4779	14.3313	10.3009	4.79523	5.58594	7.5496	0.499256	0.222314	1.35997	0.574724	1.1899
IPI00028122.1	PSIP1	Isoform 1 of PC4 and SFRS1-interacting protein and	0.244431	0.143279	0.361458	0.467682	0.828113	0.261159	0.210939	0.228791	0.378457	0.589964	0.520908	0.274276	0.43419	0.325088	0.15811	0.80434	0.60294	0.816303	0.636779	0.837458
IPI00549919.1	CUL4A	Isoform 2 of Cullin-4A	0.285785	0.288551	0.343361	0.261394	0.552674	0.298996	0.197086	0.187479	0.223307	0.719168	0.133536	0.487847	0.277104	0.408215	0.234832	0.937782	0.858479	0.938947	0.657062	0.890151
IPI01012504.1	PGD	6-phosphogluconate dehydrogenase, decarboxylating	9.9908	8.41696	12.9009	11.3396	9.84847	7.38757	7.6587	9.23044	10.9602	11.1464	8.63263	7.38757	12.3848	8.25747	9.08257	0.446579	0.296909	0.883545	0.271862	0.871388
IPI00013890.2	SFN	Isoform 1 of 41701 protein sigma protein	0.104799	0.243012	0.541788	2.37743	1.00208	1.48123	0.980507	0.287852	5.43244	0.964331	0.140662	0.741747	0.632922	0.216254	1.1734	0.326972	0.37359	2.14245	0.569498	0.680468
IPI00218693.8	APRT	Adenine phosphoribosyltransferase	3.31659	4.71841	3.88712	5.32765	5.83204	4.73118	4.647	1.47836	5.29159	3.66725	4.99125	5.07849	3.80501	3.56055	6.07633	0.585603	0.449195	0.858485	0.897972	1.01862
IPI01011853.1	TUBB6	cDNA FLJ35358 fis, clone PUAEN2000497, highly similar to Tubulin beta-6 chain PUAEN2000497,	0.552904	0.126096	0.27969	0.136295	0.535441	1.66002	1.15821	0.141258	0.296684	1.66106	0.223261	1.56786	0.171681	0.835551	0.165225	0.220004	0.114758	3.01592	0.40052	1.81767
IPI00643530.1	CYB5R1	Protein	1.57102	1.82665	0.224938	1.272	1.37012	0.510648	1.542	0.294369	2.16775	0.193969	0.439977	0.449191	0.324795	0.257546	1.88596	0.474444	0.533492	0.751627	0.194849	0.535932
IPI00020436.4	RAB11B	Ras-related protein Rab-11B	7.14186	4.38963	8.80974	8.57419	1.72429	7.73392	7.79203	5.98811	6.79795	8.03056	10.5093	8.27638	7.41219	5.54582	6.31245	0.532065	0.456917	1.18613	0.386791	1.24205
IPI00016513.5	RAB10	Ras-related protein Rab-10	12.6135	2.05922	4.22339	6.57185	2.75414	0.164767	6.93021	1.6341	2.02258	6.67654	2.48958	0.652885	5.48845	4.5071	4.12473	0.49213	0.389291	0.617537	0.337341	0.611674
IPI00217766.3	SCARB2	Lysosome membrane protein 2	1.50077	1.63275	1.44493	0.277546	0.264273	0.199547	2.3669	0.208295	0.349073	1.11327	1.90752	1.2126	0.174307	0.331895	2.53661	0.793403	0.74258	0.827513	0.714524	1.20364
IPI00549467.3	NIT2	Omega-amidase NIT2	0.595305	0.349242	0.174815	0.415523	0.202866	0.292417	0.108789	0.557792	0.661769	0.335085	0.702466	0.555978	0.275954	0.175799	0.583822	0.697768	0.735814	1.12551	0.402699	1.32011
IPI00375396.4	FAP	cDNA FLJ60298, highly similar to Seprase to	0.422054	0.112352	0.128764	0.253244	0.383235	0.24714	0.184181	0.243332	0.225766	0.204037	0.143229	0.131524	0.293453	0.467423	0.285191	0.808929	0.575983	0.849811	0.962861	1.01629
IPI00909375.1	TMED2	cDNA FLJ52154, moderately similar to Transmembrane emp24 domain-containing protein 2 to	2.61407	2.92777	3.86	2.94833	0.368593	3.38675	3.69788	3.71767	2.43648	4.13332	2.73853	0.733363	3.42475	2.56365	2.38386	0.221652	0.202701	1.36586	0.817778	0.931235
IPI00976939.1	HARS	cDNA FLJ42841 fis, clone BRCOC2003213, highly similar to Histidyl-tRNA synthetase BRCOC2003213,	0.234913	0.133619	2.35023	0.393818	0.358514	3.32787	0.359733	0.518171	0.360932	0.286538	5.19167	0.128737	0.142942	0.145875	2.65112	0.634351	0.713132	1.39819	0.418361	2.37975
IPI01015586.1	GNS	Uncharacterized protein	0.293067	0.232645	0.150757	0.598324	0.386516	0.262393	0.393927	0.382783	0.890261	0.399841	0.274771	0.400618	0.2807	0.309026	0.179269	0.298651	0.349289	1.40203	0.627755	0.869425
IPI00880022.1	MMP11	cDNA PSEC0140 fis, clone PLACE1005783, highly similar to STROMELYSIN-3 PLACE1005783,	0.239434	0.171372	0.338447	0.419604	0.446645	0.365185	0.21717	0.287473	0.26722	0.84078	0.502571	0.138437	0.0741299	0.219349	0.238325	0.422445	0.585416	1.22428	0.356779	0.725974
IPI00037448.3	GRHPR	Glyoxylate reductase/hydroxypyruvate reductase	3.77506	4.72692	4.44567	5.50369	9.8396	6.4715	6.63778	7.77423	8.85689	9.83347	11.6012	13.0457	8.44794	3.59502	2.78659	0.446071	0.119258	1.39882	0.373754	1.39537
IPI01008853.1	SLC39A7	Uncharacterized protein	0.200392	0.158428	1.03965	2.01643	1.13398	1.20924	0.186973	0.339269	0.127282	0.780516	0.323716	0.375582	0.232387	0.743137	0.24608	0.305549	0.374617	0.581083	0.204902	0.42228
IPI00026530.4	LMAN1	Protein ERGIC-53	6.27885	5.19563	5.89789	5.13691	6.88759	5.30187	7.93648	6.41211	2.71246	2.39579	4.68452	5.02666	9.1337	5.61544	5.6824	0.594931	0.44546	0.842222	0.869318	1.02537
IPI00642807.1	NDUFB8	Uncharacterized protein	0.314493	0.24438	0.145128	0.712618	0.298437	0.297425	0.350722	0.223183	0.757018	0.163414	0.608572	0.899129	0.676518	0.13792	0.527228	0.297094	0.91705	1.04473	0.190633	1.66138
IPI01012417.1	NSUN2	59 kDa protein	0.220798	0.258978	0.172875	0.305999	0.62369	0.216855	0.452315	0.428302	0.215088	0.271966	0.298541	0.159431	0.457359	0.231246	0.135851	0.751251	0.996461	1.00138	0.561304	0.810463
IPI00013405.1	MMP10	Stromelysin-2	0.668732	0.440679	0.520763	0.339504	0.32529	0.247912	0.302373	0.278298	0.210501	0.353259	0.261304	0.114586	0.424725	0.445501	0.148301	0.0631688	0.0435549	0.606694	0.0895461	0.607597
IPI00719611.2	GPD2	Isoform 2 of Glycerol-3-phosphate dehydrogenase, mitochondrial dehydrogenase,	0.857614	0.909976	0.233	0.315191	1.50233	0.47038	0.204745	1.00961	0.206527	0.53812	0.323088	0.306594	2.55886	0.188378	0.736726	0.706774	0.344104	0.636279	0.909741	1.0774
IPI00294911.1	SDHB	Succinate dehydrogenase [ubiquinone] iron-sulfur subunit, mitochondrial subunit,	1.14409	0.492433	0.831103	1.09802	1.77043	1.41265	0.371697	0.365109	1.73917	0.367369	0.429193	2.05552	0.522861	0.875088	1.02712	0.851941	0.574042	0.797589	0.818532	0.92011
IPI00216003.4	CUL5	Cullin-5	0.102337	0.205228	0.545329	0.910859	0.112383	0.157399	0.285468	0.34234	0.380087	0.274143	0.537114	0.451626	0.236252	0.366961	0.261032	0.783311	0.612942	0.767234	0.978848	0.98766
IPI00478127.3	TCEAL3	Transcription elongation factor A protei protei	0.251617	0.226628	0.185475	0.260562	0.477807	1.26094	0.467002	0.187427	0.348493	0.359061	1.24868	0.153276	0.192763	0.826508	0.690254	0.348172	0.273193	1.87072	0.173585	2.21917
IPI00298057.3	PPL	Periplakin	0.487205	0.197155	0.174162	1.10703	0.367012	0.208975	0.561477	0.292012	0.183608	0.633098	0.539614	0.704123	0.377985	0.426288	0.184373	0.861217	0.655858	0.805623	0.919791	0.95705
IPI00783287.1		Immunglobulin heavy chain variable region (Fragment) region	11.5859	7.15028	10.8513	14.0763	8.45908	17.779	15.1874	10.3081	20.1736	16.8959	34.411	24.6378	5.44262	11.213	9.31593	0.354465	0.0269332	1.54143	0.29621	1.63115
IPI00103636.1	WFDC2	Isoform 2 of WAP four-disulfide core domain protein 2 four-disulfide	0.319458	0.251948	0.160528	0.458629	0.980847	0.255359	0.372394	0.34683	0.203288	1.78188	0.443621	0.219167	0.185077	0.398099	0.228078	0.571902	0.652603	1.36305	0.407053	0.678841
IPI00647467.1	PTPMT1	Isoform 2 of Protein-tyrosine phosphatase mitochondrial 1 phosphatase	0.149872	0.3989	0.166017	0.492843	0.761544	0.233566	0.343266	0.240632	0.383368	0.201144	0.27822	0.0627126	0.201577	0.209337	0.363166	0.290263	0.384638	0.71196	0.220627	0.566233
IPI00025039.1	FBL	rRNA 2-O-methyltransferase fibrillarin	3.53081	1.80939	3.15622	2.01531	0.305321	2.66549	4.91741	1.63354	3.42357	4.10534	0.330495	4.38933	1.9752	3.17752	4.54128	0.453781	0.178143	1.54805	0.482516	1.33251
IPI00027442.4	AARS	Alanyl-tRNA synthetase, cytoplasmic	0.650175	0.0869783	2.5352	0.186921	0.367318	0.617367	0.311003	0.517417	0.264529	0.393354	2.63865	0.168346	0.318927	2.42368	0.158978	0.501225	0.491565	0.54975	0.619381	1.49182
IPI00032179.3	SERPINC1	Antithrombin-III	14.9939	9.75877	9.60776	12.1291	7.58474	11.6625	12.2262	8.89503	24.366	11.5514	18.6073	12.952	1.7486	7.16119	8.70232	0.503169	0.369262	1.2705	0.763626	0.909332
IPI00025974.3	CHMP4B	Charged multivesicular body protein 4b 4b	0.0714461	0.481865	0.895894	1.43555	1.72596	0.528106	0.1877	0.177059	0.465967	0.453948	0.284106	0.481965	0.812027	1.19309	0.515341	0.188123	0.138939	0.393167	0.467001	0.712802
IPI00910594.2	DCAF7	Uncharacterized protein	0.377173	0.0840214	0.217095	0.410428	0.151585	0.406915	0.210137	0.358191	0.393954	0.253718	0.258458	0.204802	0.241116	0.194872	0.139952	0.212707	0.340189	1.30848	0.573017	0.837859
IPI00964207.1	OCIAD1	Uncharacterized protein	1.51835	2.25433	0.593368	0.581641	0.626723	0.387213	1.01227	1.81164	0.514449	1.34099	0.534218	1.19864	0.275438	0.625768	1.25597	0.673304	0.818172	0.908898	0.415699	0.697838
IPI00027252.6	PHB2	Prohibitin-2	17.9735	15.4668	21.6636	21.4886	29.1414	16.771	26.142	28.1078	38.4763	32.8313	0.281323	33.3265	29.334	16.4168	18.8606	0.310585	0.133098	1.3461	0.818217	0.928928
IPI00013847.4	UQCRC1	Cytochrome b-c1 complex subunit 1, mitochondrial 1,	9.6331	4.79756	5.81952	4.59957	5.3015	3.05146	5.77412	2.24996	2.0701	7.29597	0.280156	6.86376	7.31572	7.76239	6.11351	0.457357	0.20115	0.677969	0.832725	0.93978
IPI00641957.4	SRSF11	SFRS11 protein	0.496753	0.0713323	0.210253	0.927681	0.352062	0.359983	0.664988	0.171099	0.144066	0.727541	0.287792	0.234344	0.24345	0.130724	0.149623	0.361982	0.992238	1.00466	0.243983	0.508208
IPI00909705.1	cDNA FLJ57896	cDNA FLJ57896, highly similar to Arylsulfatase A to	0.203641	0.262957	0.379192	0.567936	3.80026	0.393982	1.81051	0.677503	0.402399	0.385099	0.294329	0.101821	0.688343	0.538232	0.129695	0.546527	0.694756	0.703779	0.376909	0.3361
IPI00025849.1	ANP32A	Acidic leucine-rich nuclear phosphoprotein 32 family member A	14.6132	15.3525	9.06621	18.2396	12.3539	14.7138	16.8608	14.9368	17.7199	18.2067	32.3658	16.4795	9.74999	13.6497	14.7772	0.596515	0.184073	1.18402	0.442906	1.24986
IPI00643918.1	PSMF1	Uncharacterized protein	1.07096	0.236416	1.03807	0.34587	0.161511	0.836073	1.18921	1.072	1.48483	1.21841	0.153765	0.179009	2.2858	1.74473	0.419546	0.368047	0.0397353	2.03326	0.459583	1.67653
IPI00021338.2	DLAT	Dihydrolipoyllysine-residue acetyltransferase component of pyruvate dehydrogen pyruvate	2.0806	4.21783	0.928388	2.80578	0.505751	2.52941	3.51445	2.03186	2.914	2.914	4.06935	6.35988	0.805636	0.770785	9.20489	0.354441	0.386488	1.31935	0.276264	2.0127
IPI00878876.1	SNRPD3	Uncharacterized protein	5.02492	5.81992	9.67526	3.31199	6.90289	7.42762	5.41214	4.33731	0.343909	7.92549	7.89369	4.75716	4.58747	5.40202	4.52212	0.775248	0.5565	0.827932	0.5821	0.883764
IPI00925950.1	TNS1	Uncharacterized protein	0.420769	0.285151	0.345654	0.219836	0.268278	0.797358	0.36913	0.33432	0.2375	0.642514	0.832891	0.568881	0.263432	0.941674	0.256246	0.228383	0.189369	1.5463	0.135406	1.85955
IPI00010404.1	SF3B5	Splicing factor 3B subunit 5 5	0.320212	0.117221	0.201786	0.271383	0.615786	0.180955	0.891558	0.269807	0.469208	0.195075	0.173921	0.187064	0.2926	0.074094	0.278433	0.353102	0.562239	1.31461	0.311265	0.659145
IPI00168728.1	IGHM	FLJ00385 protein (Fragment)	66.5008	11.8523	7.36712	33.345	14.5758	20.1681	9.86692	4.328	24.0573	8.09314	53.416	22.6619	3.45959	13.9684	7.75754	0.545026	0.296825	0.497702	0.657808	0.757728
IPI00607799.5	BDH2	Isoform 1 of 3-hydroxybutyrate dehydrogenase type 2 dehydrogenase	0.352623	0.325787	0.165213	0.336528	1.14687	0.29441	0.794214	0.624511	0.325719	0.89577	0.131944	0.106668	0.364073	0.232338	1.26462	0.786963	0.58367	1.26111	0.873916	0.902287
IPI01010639.1	FBLN2	Isoform 1 of Fibulin-2	0.34496	0.075097	0.307807	1.41637	0.167694	1.24868	0.319835	0.495549	0.526681	0.507929	0.254529	0.638607	1.03483	0.212274	0.186378	0.808569	0.606943	1.3403	0.992296	1.00635
IPI00760554.2	HLA-B	HLA class I histocompatibility antigen, A-69 alpha chain	0.102422	0.218015	0.257903	0.320968	0.481231	0.287493	0.134549	0.183163	0.958998	0.550418	0.453319	0.180917	3.11299	0.204164	0.646759	0.390386	0.410482	1.53174	0.311926	3.33069
IPI00477971.4	TBL3	Transducin beta-like protein 3	0.113747	0.853108	0.364401	0.510188	0.536481	0.298024	0.183735	0.227258	0.645863	0.350236	0.348058	0.23897	0.148496	0.486496	0.130933	0.315212	0.38567	0.71706	0.185189	0.568964
IPI00642948.1	CD99	CD99 antigen isoform b precursor precursor	1.17048	1.26822	0.215745	0.243299	0.3881	1.99931	1.23593	0.15811	0.294614	1.11134	0.182239	0.309712	1.32225	1.22213	1.27863	0.739041	0.48267	1.4606	0.565561	1.3132
IPI00003217.3	PSMB7	Proteasome subunit beta type-7	0.362261	0.256939	0.271985	0.245501	1.04398	0.284974	0.49199	0.305279	0.426317	0.203105	0.506699	0.305978	0.212348	0.306403	0.142349	0.608255	0.587819	0.784926	0.429331	0.675836
IPI00794643.1	RAE1	Uncharacterized protein	0.488625	0.245654	0.426199	0.132485	0.522354	0.371182	0.253226	0.17776	0.296664	0.240732	0.241618	0.290619	0.223477	0.105338	0.313166	0.228472	0.291469	0.737923	0.175915	0.646839
IPI00964626.1	ITGA2	Uncharacterized protein	0.31517	0.159906	0.163901	0.267535	0.194238	0.619167	0.227116	0.419313	0.417833	0.419837	0.478835	0.196255	0.807705	0.199367	0.384272	0.15112	0.0281964	1.91076	0.164016	1.87729
IPI00012585.1	HEXB	Beta-hexosaminidase subunit beta	0.668639	0.269583	0.582286	0.297859	0.280778	0.512385	0.199395	0.217804	0.552521	0.466193	0.718221	0.174875	0.423373	0.130462	0.529719	0.969704	0.797444	0.928139	0.864836	0.941646
IPI00219160.3	RPL34	60S ribosomal protein L34	2.66272	0.145561	0.293107	0.267183	1.22961	0.188117	0.357273	0.513986	2.47152	0.220126	2.80539	3.06397	0.280544	0.330243	2.28913	0.361689	0.799506	0.815763	0.311837	1.90712
IPI00473014.5	DSTN	Destrin	1.53975	1.82741	2.02651	4.01667	3.32119	4.34212	0.190478	4.75024	2.36805	2.40227	4.2149	1.47662	1.70515	3.72903	3.27728	0.925419	0.788671	1.10381	0.658142	1.13128
IPI00218547.1	ALDH18A1	Isoform Short of Delta-1-pyrroline-5-carboxylate synthase synthase	0.672777	0.301577	0.30018	0.391016	0.233339	0.26934	0.733821	0.378116	0.543556	0.283417	0.388423	0.13324	0.200295	0.540438	0.246609	0.482786	0.611892	1.16292	0.484318	0.794678
IPI00642518.1	C19orf66	Isoform 3 of UPF0515 protein C19orf66 protein	0.281909	0.133443	0.16397	0.225328	0.453508	0.64287	0.144036	0.244957	0.807817	0.407141	0.270763	0.281538	0.374776	0.942981	0.166189	0.443418	0.197779	1.7858	0.3418	1.61843
IPI01022666.2	HLA-DRB4	HLA-DRB5 MHC class II antigen (Fragment)	0.266166	0.287414	0.55164	0.350236	0.254723	0.227242	0.230878	0.241518	0.43882	0.55756	0.470739	0.281538	1.03047	0.735501	0.272495	0.231956	0.974891	0.991719	0.220722	1.63184
IPI00744062.1	TCERG1	Isoform 2 of Transcription elongation regulator 1 elongation	0.189241	0.170495	0.409433	0.222134	0.148909	0.243079	0.177661	0.276318	0.112127	0.23493	0.950725	0.226361	0.112298	0.226424	0.381988	0.383739	0.73806	0.91572	0.378765	1.66442
IPI00853068.2	HBA2	Hemoglobin alpha-2	0.170058	0.135908	0.359808	0.178946	0.174029	0.212583	0.271703	0.225891	0.327848	0.292113	0.249187	0.320723	0.585321	0.255891	0.173343	0.293298	0.215276	1.30566	0.211892	1.5553
IPI00922277.1	PARVA	cDNA FLJ54827, highly similar to Alpha-parvin to	2.08421	2.43767	5.03084	0.200073	1.17072	3.49139	2.64359	0.641357	5.45357	0.385606	7.66189	2.33011	1.50598	2.16745	0.224985	0.920043	0.792114	1.15489	0.706719	1.27161
IPI00217950.5	HMGN2	Non-histone chromosomal protein HMG-17	0.151302	32.1066	0.174827	0.21173	18.892	34.9956	15.1044	44.9578	14.9617	0.384112	57.6441	42.362	0.119187	0.127317	34.1284	0.42821	0.286708	2.14224	0.256349	2.60749
IPI00017726.1	HSD17B10	Isoform 1 of 3-hydroxyacyl-CoA dehydrogenase type-2 dehydrogenase	8.58311	8.73072	8.98738	11.3443	13.7943	9.6719	9.29078	9.75066	18.0122	16.8842	11.8581	16.2357	13.6063	7.43277	11.2652	0.518543	0.308142	1.23658	0.343305	1.17415
IPI00221111.1	PACSIN2	Isoform 2 of Protein kinase C and casein kinase substrate in neurons protein 2 kinase	0.313253	2.7317	0.139884	0.965401	2.11301	0.112446	0.950461	1.19408	2.09682	0.129426	0.220034	0.147409	0.467293	0.167438	1.60792	0.45102	0.587251	0.715799	0.251281	0.416733
IPI00383680.3	RPN2	dolichyl-diphosphooligosaccharide--protein glycosyltransferase subunit 2 isoform 2 precursor isoform	37.8363	39.5882	49.3063	32.7495	51.3289	36.7915	32.3703	41.5507	38.9999	50.4052	26.2983	39.7009	41.5104	29.969	35.1341	0.247928	0.656966	0.949283	0.132991	0.81881
IPI00984941.1	LYPLA1	Uncharacterized protein	2.42553	0.212701	0.196772	0.0814015	2.7683	0.23019	0.137147	2.13539	0.385874	0.645908	0.336832	0.335783	0.535701	0.211203	0.142942	0.388519	0.560874	0.621758	0.241488	0.274853
IPI00155168.2	PTPRC	Protein tyrosine phosphatase, receptor type, C type,	0.304877	0.284322	0.281928	0.319126	0.547526	0.297096	0.195915	0.244262	0.62179	0.613102	0.167079	0.335527	0.913895	0.90175	0.191087	0.632147	0.671414	1.13488	0.422133	1.44399
IPI00977083.1	DDB1	Uncharacterized protein	1.56623	1.28405	0.701639	0.198857	1.36974	0.391776	0.494623	0.495721	0.460317	0.448289	0.0989539	0.868983	0.544121	0.569789	0.841421	0.0772636	0.0875572	0.447362	0.175187	0.570893
IPI00893222.1	TOMM7	Uncharacterized protein	0.320723	0.484141	0.517489	0.178909	0.170176	0.400202	0.506699	0.106786	0.71862	0.316132	0.237352	0.228458	0.17496	0.240265	0.220691	0.219059	0.564816	1.22555	0.195897	0.659149
IPI00216425.1	TES	Isoform 2 of Testin	0.659571	0.0702382	0.266296	0.272551	0.267239	0.186571	0.480264	0.303549	0.541	0.21424	0.168568	0.41354	0.60257	0.514271	0.417891	0.596879	0.759578	1.12353	0.365059	1.37825
IPI00026546.1	PAFAH1B2	Platelet-activating factor acetylhydrolase IB subunit beta subunit	2.79898	2.95386	2.32028	2.51246	5.24994	2.65903	2.58327	2.98432	2.73246	2.85977	7.22251	2.84356	2.39728	3.02639	3.00029	0.558702	0.492998	0.872649	0.625016	1.16763
IPI00008530.1	RPLP0	60S acidic ribosomal protein P0 P0	45.4308	56.4069	52.7537	53.3716	44.345	39.3311	46.3437	36.9397	62.2025	51.4037	43.0338	33.0711	48.1813	55.0473	46.4884	0.592623	0.552109	0.936239	0.259022	0.895025
IPI00219994.2	CSE1L	Isoform 3 of Exportin-2	21.5214	21.0551	24.5321	13.8864	17.966	0.267628	19.6547	17.9561	17.5731	23.2991	15.4389	7.31116	19.8202	18.1765	15.8631	0.487481	0.395308	0.795773	0.151689	0.774141
IPI00216237.5	RPL36	60S ribosomal protein L36	13.9317	3.98837	4.54002	0.206169	4.92936	4.65893	3.73498	3.65964	4.8239	5.41214	8.07297	5.47591	6.19112	7.2516	3.52274	0.707503	0.666222	0.807722	0.817376	1.10577
IPI00003470.1		Ig kappa chain V-I region Wes region	0.128701	0.32329	0.251564	0.32651	0.407847	0.168019	0.293717	0.480231	0.153754	0.409093	0.092963	0.0863895	0.488828	0.304434	0.207416	0.74979	0.871222	1.04653	0.578397	0.820655
IPI00924791.1	COPS6	Uncharacterized protein	0.152576	0.478669	0.2833	0.531448	0.458089	0.455177	0.156681	0.507402	0.260454	0.778895	0.657289	0.907708	0.430713	0.275018	0.475923	0.475549	0.704529	1.13367	0.234558	1.44251
IPI00025019.3	PSMB1	Proteasome subunit beta type-1	2.21039	2.78369	4.50117	1.91242	2.23024	5.57086	2.59188	3.46055	2.77176	4.88379	4.47659	1.84792	2.98369	3.46967	2.23829	0.299918	0.173	1.41362	0.68591	1.10106
IPI00925023.9	NDUFS1	NADH-ubiquinone oxidoreductase 75 kDa subunit, mitochondrial isoform 4 subunit,	3.65051	3.59004	8.1851	6.54231	6.90672	5.92288	4.85241	8.17489	11.1804	9.40286	3.91904	5.62167	9.90049	5.62206	4.74793	0.310025	0.186946	1.36914	0.895797	1.03243
IPI00479503.1	DYNLT1	Uncharacterized protein	0.422522	0.270444	0.193781	0.639094	0.771373	0.2462	0.337509	1.66221	0.522861	0.796364	0.100009	0.53868	0.393654	0.192723	0.142526	0.217063	0.39972	1.55194	0.214468	0.595326
IPI00220994.3	H2AFY2	Core histone macro-H2A.2	2.4801	3.38933	8.92282	6.97648	0.114269	6.70436	4.06851	4.63638	1.32198	1.91361	3.59976	4.97846	4.28442	2.71886	5.10956	0.916206	0.738217	0.852024	0.890892	0.945531
IPI00018342.5	AK1	Adenylate kinase isoenzyme 1	0.269153	0.388531	0.38915	0.906765	0.284165	0.175106	0.327054	0.220691	0.338587	0.373014	0.815751	0.15655	0.651528	0.491547	0.122478	0.486465	0.251902	0.64102	0.999922	1.00004
IPI00449920.1	IGHA1	cDNA FLJ90170 fis, clone MAMMA1000370, highly similar to Ig alpha-1 chain C region MAMMA1000370,	143.35	28.9783	49.5324	84.3198	49.4363	93.2544	88.7577	32.7472	209.456	128.32	262.323	74.3675	52.1213	110.776	39.745	0.616665	0.301771	1.55373	0.447887	1.51661
IPI00219446.5	PEBP1	Phosphatidylethanolamine-binding protein 1	51.4286	52.9589	57.3094	83.7664	113.135	55.9862	67.8558	63.9911	80.1539	58.6679	86.1035	58.6639	54.614	44.462	45.7342	0.533756	0.634531	0.910922	0.360767	0.807526
IPI00297492.2	STT3A	Dolichyl-diphosphooligosaccharide--protein glycosyltrans	3.24721	5.46606	2.53415	0.285963	2.46947	3.58258	3.17532	3.80844	4.14767	3.43498	4.42507	4.46203	1.23739	2.4681	3.74042	0.63664	0.379306	1.29609	0.666355	1.16641
IPI00026602.2	HLA-B	LOC441528 HLA class I histocompatibility antigen, B-41 alpha chain	0.299536	0.123023	0.331022	0.239567	0.240649	1.62597	0.219258	0.258153	0.235484	0.687676	2.02722	0.286618	0.14694	0.176275	0.155006	0.594115	0.255721	2.45303	0.445961	2.26298
IPI00030847.3	TM9SF3	Transmembrane 9 superfamily member 3 3	1.60603	0.844635	1.25832	0.205641	0.513238	0.264658	1.02513	0.114205	1.07721	0.783226	0.284145	0.184885	0.273991	1.60714	1.25432	0.800324	0.48788	0.737245	0.682602	0.814045
IPI00023014.3	VWF	von Willebrand factor	0.248531	0.271891	0.344888	0.298086	0.272476	0.534292	0.324637	0.360857	0.238688	0.336482	0.61617	0.213011	0.227084	0.508669	0.587068	0.263561	0.22016	1.25008	0.178998	1.49874
IPI00384401.1		Myosin-reactive immunoglobulin kappa chain variable region (Fragment) variable	3.82856	3.5534	7.81638	6.37666	2.3408	3.30145	3.43474	2.0711	5.25758	3.39168	3.07247	6.16799	1.78893	4.78295	2.44071	0.480597	0.29504	0.729918	0.404935	0.763222
IPI00218343.4	TUBA1C	Tubulin alpha-1C chain	0.414689	0.440587	0.670217	0.624122	1.14798	0.191923	1.46165	1.37078	0.174355	0.627245	0.371234	1.04877	0.126473	0.312841	0.792619	0.721153	0.743747	1.16023	0.564996	0.804203
IPI00553185.2	CCT3	T-complex protein 1 subunit gamma gamma	16.9616	18.7433	18.213	19.5162	33.745	13.2682	18.9957	19.4595	24.2078	21.6846	31.7371	23.5263	9.72434	15.1118	22.4027	0.904641	0.61279	0.910773	0.85306	0.956364
IPI00911058.1		cDNA FLJ57382, highly similar to Ribonuclease P protein subunit P30 to	0.250711	0.291325	0.295289	0.355717	0.365616	0.23676	0.295248	0.217607	0.812534	0.114705	0.220477	0.228379	0.456694	0.178785	0.0921418	0.661546	0.858329	1.07583	0.286718	0.754801
IPI00013452.11	EPRS	Bifunctional aminoacyl-tRNA synthetase	0.334181	1.33062	1.5756	2.50967	2.13022	1.58337	3.6902	2.7042	0.761808	4.80355	0.216584	2.43496	2.40744	2.10453	1.65829	0.300026	0.212611	1.71861	0.743341	1.11948
IPI00790634.2	WIBG	Isoform 2 of Partner of Y14 and mago of	0.195373	0.207517	0.749292	0.240515	0.653519	0.372884	0.212451	0.115944	0.293249	0.812985	0.263724	0.279767	0.390962	0.360482	0.0887383	0.663687	0.786569	0.883345	0.355994	0.676211
IPI00217519.3	RALA	Ras-related protein Ral-A	0.262811	0.483437	0.297508	0.382545	0.220676	0.293107	0.32099	0.934716	0.635824	0.200476	0.822279	0.131142	0.559302	0.705931	1.3017	0.194056	0.352045	1.44818	0.120011	2.13747
IPI00030009.4	PAPSS2	Isoform A of Bifunctional 3-phosphoadenosine 5-phosphosulfate synthase 2 3-phosphoadenosine	0.218787	0.381485	0.330403	0.699841	0.252735	0.263834	0.0817408	0.498097	0.285785	0.382068	0.227494	0.376051	0.210297	0.216509	0.167299	0.377631	0.519019	0.802613	0.195944	0.635948
IPI00940330.1	BCAT1	branched-chain-amino-acid aminotransferase, cytosolic isoform 3 3	0.220645	0.883193	0.316045	0.278626	0.253121	0.73693	0.285705	0.179009	0.435336	0.425343	1.00989	0.266406	0.372807	0.306318	0.27127	0.949905	0.890725	1.05672	0.778494	1.14094
IPI00018331.3	SNAPIN	SNARE-associated protein Snapin	0.381406	0.15921	0.159298	0.301389	0.166385	0.519322	0.217638	0.261739	0.291405	0.341605	1.11497	0.322462	0.412882	0.0957091	0.17755	0.502944	0.219332	1.39738	0.357987	1.81861
IPI00926196.2	HIP1	cDNA FLJ56396, highly similar to Huntingtin-interacting protein 1 to	0.442914	0.593122	0.164436	0.197908	0.629859	0.10509	0.105127	0.1863	0.456916	0.313014	0.0768346	0.259859	0.139642	0.742931	0.45952	0.476768	0.187404	0.575103	0.664582	0.827706
IPI00032561.1	CAB39	Calcium-binding protein 39	0.416994	0.333255	0.434913	0.641713	0.38035	0.330678	0.361082	0.305957	0.387831	0.777007	1.24091	0.289373	0.393081	0.422815	0.143747	0.923644	0.932844	0.979762	0.788869	1.12808
IPI00550243.2	THUMPD1	THUMP domain-containing protein 1	1.89421	2.90936	1.67621	2.83412	2.81201	0.905571	1.89855	4.07133	0.269135	2.20503	2.63847	4.60276	3.09964	0.147379	3.17488	0.583715	0.462754	0.771045	0.706693	1.12677
IPI00294955.3	LSM4	U6 snRNA-associated Sm-like protein LSm4 LSm4	0.239036	1.2743	0.533441	0.352843	0.310034	0.694959	0.472406	0.132917	0.270387	0.260039	0.42499	0.257992	1.23114	0.182694	0.367955	0.743931	0.441774	0.675626	0.859443	0.909628
IPI00166845.2	FYN	Isoform 3 of Tyrosine-protein kinase Fyn kinase	1.12467	1.396	1.05336	0.281245	0.183087	0.909471	0.998338	0.746907	1.26637	1.19102	3.28843	0.72618	0.314973	1.54917	0.997854	0.501064	0.445093	1.26589	0.361771	1.70282
IPI00943181.1	PSME2	Uncharacterized protein	17.3986	5.92987	6.07633	4.76409	5.02492	9.64245	3.88092	1.35585	1.84357	11.2029	6.29846	0.824448	20.6476	7.8833	1.18296	0.833077	0.495092	0.712503	0.916298	0.939861
IPI00978981.1	SQLE	Uncharacterized protein	1.04095	0.204178	0.844986	0.116468	0.162668	0.216749	0.760648	0.307232	0.36377	0.334667	0.438364	0.240799	0.123032	0.373894	0.355199	0.66412	0.733524	0.837002	0.44791	0.646317
IPI00002552.2	AP1M2	Isoform 1 of AP-1 complex subunit mu-2 complex	0.138523	0.358539	0.360382	0.57153	1.08975	0.534662	0.436998	0.114705	0.525477	0.220278	0.300159	0.154513	0.116516	0.332586	0.471229	0.375888	0.48014	0.7274	0.243241	0.545912
IPI00973067.1	POR	Uncharacterized protein	0.466258	0.303528	0.292174	0.647521	0.268538	0.305724	0.248842	0.290176	0.448817	0.202248	0.145713	0.329557	0.305406	0.341794	0.369744	0.362513	0.287497	0.756214	0.280376	0.754398
IPI01024900.1	HLA-DRB4	HLA-DRB5 MHC class II antigen (Fragment)	0.290458	0.166397	0.190412	0.168579	0.430624	0.264933	0.529389	0.161488	0.721764	0.17066	0.209511	0.248876	0.731941	0.777654	0.300888	0.379177	0.362308	1.48278	0.184046	1.82024
IPI00893035.1	CAD	Uncharacterized protein	0.75278	0.128194	0.41879	0.265503	1.08088	0.22037	0.21053	0.449907	0.293901	0.478205	1.12646	0.332425	0.447482	0.181986	0.799406	0.461324	0.325775	0.62465	0.847324	1.09131
IPI00025178.3	BCAS2	Pre-mRNA-splicing factor SPF27	0.223694	0.275133	0.339834	0.139322	0.696164	0.408498	0.508035	0.276356	0.203966	0.550685	0.203443	0.256317	0.192203	0.474737	0.399122	0.726994	0.653428	1.1633	0.79817	0.911402
IPI00026650.1	HLA-B	HLA class I histocompatibility antigen, Cw-1 alpha chain	0.518674	0.381618	0.322149	0.267276	0.388692	0.180516	0.169364	0.160028	1.08771	0.239833	0.415437	0.186106	0.64296	0.176777	0.116298	0.910561	0.966685	0.978198	0.549065	0.818553
IPI00554681.2	NDUFA5	NADH dehydrogenase [ubiquinone] 1 alpha subcomplex subunit 5 alpha	4.24128	4.31093	1.5154	2.09087	2.10439	2.75834	2.3692	2.09536	5.21403	3.48124	4.36838	2.97729	2.63627	4.07105	2.26655	0.843858	0.694604	1.11606	0.584627	1.1442
IPI01025005.1	RPL6	Uncharacterized protein	19.2555	16.3986	11.8745	25.5155	12.4149	17.4348	13.8144	15.2401	17.4034	14.9887	15.378	15.3153	17.0713	19.2635	15.8598	0.837353	0.636169	0.923032	0.852038	0.969914
IPI00412607.6	RPL35	60S ribosomal protein L35	2.67548	2.59242	1.92412	5.29562	3.86669	4.51367	0.135419	2.57255	2.5926	2.9304	0.348517	3.41078	3.94165	2.96452	3.61426	0.738028	0.455657	0.779282	0.649496	0.873146
IPI00888868.5	C10orf112	MAM and LDL-receptor class A domain-containing protein C10orf112 A	0.38175	0.223477	0.632659	0.192897	0.505261	0.299515	0.356778	0.271797	0.598242	0.68739	0.413053	0.445007	0.337626	0.538493	0.197127	0.836123	0.651302	1.14343	0.99278	0.997554
IPI00972999.1	HDAC2	Histone deacetylase	1.09422	0.76993	0.72618	1.13847	1.72118	0.19695	1.23516	0.871637	0.549922	0.901688	1.21159	0.571094	0.312472	1.00153	1.2676	0.429184	0.212996	0.689059	0.423895	0.800788
IPI00654755.3	HBB	Hemoglobin subunit beta	3836.83	2254.51	1896.99	3154.95	2367.26	2507.79	2374.98	3589.08	5275.53	4905.89	5527.84	4201.82	3849.09	1841.93	1358.97	0.491031	0.1842	1.38065	0.472495	1.24197
IPI00478231.2	RHOA	Transforming protein RhoA	8.38203	11.4304	11.7958	9.02984	10.193	4.44382	9.11536	6.1894	9.31141	9.43485	10.5021	9.63777	0.626897	12.8029	13.5442	0.513188	0.0812632	0.757311	0.770637	0.926872
IPI00909336.1		cDNA FLJ59092	1.32042	2.71246	1.04312	3.3844	2.60846	2.25511	1.92719	1.79427	2.28374	2.25293	0.325313	3.05908	0.961794	0.961527	2.44765	0.471065	0.818153	0.949804	0.358177	0.700648
IPI00856091.1	COMMD9	Isoform 2 of COMM domain-containing protein 9 domain-containing	0.206541	0.0830314	0.42499	0.432329	0.338893	1.04768	0.32421	0.113094	0.231647	1.22357	0.361759	0.127565	0.124473	0.373427	0.217231	0.214509	0.278503	1.97889	0.534264	0.810653
IPI00217626.5	RBM12B	Uncharacterized protein	1.12763	0.128318	0.467034	0.658612	0.309862	0.415667	0.279651	0.621015	0.314166	0.165706	0.317846	0.26672	0.315104	0.266019	0.342696	0.311343	0.379884	0.667372	0.23992	0.560433
IPI00977405.1		similar to Ig kappa chain V-III region VG precursor chain	7.94364	5.30922	5.30775	6.91534	4.45153	6.21951	6.99246	5.74457	17.354	5.95211	10.5392	6.14111	3.00486	6.84476	4.15256	0.467514	0.340381	1.41217	0.920134	1.02523
IPI00795118.2	COL7A1	Isoform 2 of Collagen alpha-1(VII) chain alpha-1(VII)	0.103651	0.250538	0.224175	0.460381	0.153893	0.175592	0.528326	0.269583	0.244923	0.323245	0.469371	0.167822	0.472767	0.184834	0.409745	0.522739	0.438612	1.29265	0.296579	1.42922
IPI00304267.3	NXN	Isoform 1 of Nucleoredoxin	0.252036	0.168474	0.393	0.191193	0.0632803	0.197209	0.210793	0.297446	0.250139	0.20432	0.143737	0.278317	0.136162	0.174452	0.210837	0.707082	0.761734	1.08607	0.693841	0.883446
IPI00748640.3	MPI	cDNA FLJ56688, highly similar to Mannose-6-phosphate isomerase to	0.310809	0.81609	0.327576	0.173764	0.518027	0.225375	0.412653	0.305724	0.361032	0.308748	0.242222	0.0760979	0.262356	0.718171	0.233194	0.599872	0.401714	0.751786	0.451226	0.713817
IPI00798302.2	EIF4B	cDNA FLJ59405, highly similar to Eukaryotic translation initiation factor 4B to	0.310163	0.93504	0.378693	0.43419	0.290518	0.159309	0.3888	0.769504	0.405873	0.183061	0.534885	0.735247	0.664389	0.383554	0.475165	0.479965	0.599779	0.811779	0.533967	1.18932
IPI00872036.1	2016-09-10	Isoform 3 of Septin-10	0.182935	0.155157	0.169047	0.49665	0.237352	0.444144	0.57149	0.146899	0.236351	0.232097	0.480331	0.174645	0.308962	0.357819	0.288651	0.644608	0.463417	1.3141	0.388601	1.29752
IPI00647890.1	C9orf64	Uncharacterized protein	0.183659	0.170495	0.10815	0.600943	0.523369	0.343552	0.129462	0.302038	0.751945	0.539091	0.195143	0.351257	0.453539	0.402734	0.256708	0.722107	0.533534	1.3022	0.901063	1.04586
IPI00020495.1	MRPS36	28S ribosomal protein S36, mitochondrial mitochondrial	0.361709	0.624425	0.209628	0.218	0.252473	0.43398	0.281967	0.373686	0.206641	0.241618	0.106935	0.206355	0.454389	0.408809	0.10097	0.710394	0.781009	0.922975	0.491024	0.766674
IPI00917198.1	NAGA	N-acetylgalactosaminidase, alpha-	0.141709	0.350601	0.203938	0.571252	0.367139	0.239019	0.35451	0.327735	0.250347	1.10206	0.505541	0.21714	0.202951	0.369002	0.222781	0.587122	0.505154	1.39093	0.811619	0.928288
IPI00395488.2	VASN	Vasorin	0.227399	0.336295	0.438698	0.285864	0.858089	0.385152	0.61553	0.416619	0.351769	0.287613	0.131469	0.631345	0.266277	0.227478	0.260598	0.563116	0.891225	0.958225	0.401378	0.706861
IPI00002270.3	C6orf211	UPF0364 protein C6orf211	0.691116	0.845865	1.29226	0.201046	0.201521	0.932839	0.435094	0.615231	0.360557	0.471458	0.184041	0.476253	0.885706	0.252613	0.231198	0.544786	0.730229	0.871084	0.359096	0.628072
[truncated: 371 more rows]

## Sheet: Supplementary Table 2
Supplementary Table 2. 87 proteins were both significantly changed in N Vs. A and N Vs. La. N: normal control; A: GnRH antagonist treated group (GnRH-a); La: GnRH agonist treated group (GnRH-a).
[truncated: 88 more rows]

[truncated: 2 more sheets: Supplementary Table 3, Supplementary Table 4]
